# Supplementary material
Source: publisher figshare collection journal article supplement (https://acs.figshare.com/ndownloader/files/4037068)
Supplement: Supplementary file 1 [file 4037068]

 
data_bdr92fmi
 
_audit_creation_method            SHELXL-2012
_chemical_name_systematic
;
 ?
;
_chemical_name_common             ?
_chemical_melting_point           ?
_chemical_formula_moiety          'C60 H74 Se2'
_chemical_formula_sum
 'C60 H74 Se2' 
_chemical_formula_weight          953.11

loop_
 _atom_type_symbol
 _atom_type_description
 _atom_type_scat_dispersion_real
 _atom_type_scat_dispersion_imag
 _atom_type_scat_source
 'C'  'C'   0.0033   0.0016
 'International Tables Vol C Tables 4.2.6.8 and 6.1.1.4'
 'H'  'H'   0.0000   0.0000
 'International Tables Vol C Tables 4.2.6.8 and 6.1.1.4'
 'Se'  'Se'  -0.0929   2.2259
 'International Tables Vol C Tables 4.2.6.8 and 6.1.1.4'
 
_space_group_crystal_system       monoclinic
_space_group_IT_number            15
_space_group_name_H-M_alt         'C 2/c'
_space_group_name_Hall            '-C 2yc'
 
_shelx_space_group_comment
;
The symmetry employed for this shelxl refinement is uniquely defined
by the following loop, which should always be used as a source of
symmetry information in preference to the above space-group names.
They are only intended as comments.
;
 
loop_
 _space_group_symop_operation_xyz
 'x, y, z'
 '-x, y, -z+1/2'
 'x+1/2, y+1/2, z'
 '-x+1/2, y+1/2, -z+1/2'
 '-x, -y, -z'
 'x, -y, z-1/2'
 '-x+1/2, -y+1/2, -z'
 'x+1/2, -y+1/2, z-1/2'
 
_cell_length_a                    15.4658(14)
_cell_length_b                    16.1684(15)
_cell_length_c                    20.5084(19)
_cell_angle_alpha                 90
_cell_angle_beta                  91.888(5)
_cell_angle_gamma                 90
_cell_volume                      5125.5(8)
_cell_formula_units_Z             4
_cell_measurement_temperature     90(2)
_cell_measurement_reflns_used    9783
_cell_measurement_theta_min        2.66
_cell_measurement_theta_max       27.63
 
_exptl_crystal_description       'Block'
_exptl_crystal_colour            'Red'
_exptl_crystal_density_meas       ? 
_exptl_crystal_density_method     ?              
_exptl_crystal_density_diffrn     1.235          
_exptl_crystal_F_000              2008
_exptl_transmission_factor_min    ?
_exptl_transmission_factor_max    ?
_exptl_crystal_size_max           0.710
_exptl_crystal_size_mid           0.520
_exptl_crystal_size_min           0.430
_exptl_absorpt_coefficient_mu     1.479
_shelx_estimated_absorpt_T_min    0.420
_shelx_estimated_absorpt_T_max    0.569
_exptl_absorpt_correction_type    Multi-scan
_exptl_absorpt_correction_T_min   0.4461
_exptl_absorpt_correction_T_max   0.5553
_exptl_absorpt_process_details    'SADABS 2012/1 (Sheldrick, 2008)'
 
_exptl_special_details
;
 ?
;
 
_diffrn_ambient_temperature       90(2)
_diffrn_radiation_wavelength      0.71073
_diffrn_radiation_type            MoK\a
_diffrn_source                    ?                       
_diffrn_source_monochromator      ?       
_diffrn_measurement_device_type   'Bruker APEX-II CCD'

_diffrn_measurement_method        '\f and \w scans'

_diffrn_detector_area_resol_mean  ? 
_diffrn_reflns_number             19548
_diffrn_reflns_av_unetI/netI      0.0120
_diffrn_reflns_av_R_equivalents   0.0129
_diffrn_reflns_limit_h_min        -19
_diffrn_reflns_limit_h_max        20
_diffrn_reflns_limit_k_min        -20
_diffrn_reflns_limit_k_max        20
_diffrn_reflns_limit_l_min        -26
_diffrn_reflns_limit_l_max        25
_diffrn_reflns_theta_min          1.823
_diffrn_reflns_theta_max          27.498
_diffrn_reflns_theta_full         25.242
_diffrn_measured_fraction_theta_max   0.999
_diffrn_measured_fraction_theta_full  0.999
_diffrn_reflns_Laue_measured_fraction_max    0.999
_diffrn_reflns_Laue_measured_fraction_full   0.999
_diffrn_reflns_point_group_measured_fraction_max   0.999
_diffrn_reflns_point_group_measured_fraction_full  0.999
_reflns_number_total              5875
_reflns_number_gt                 5579
_reflns_threshold_expression      'I > 2\s(I)'
_reflns_Friedel_coverage          0.000
_reflns_Friedel_fraction_max      .
_reflns_Friedel_fraction_full     .
 
_reflns_special_details
;
 Reflections were merged by SHELXL according to the crystal
 class for the calculation of statistics and refinement.
 
 _reflns_Friedel_fraction is defined as the number of unique
 Friedel pairs measured divided by the number that would be
 possible theoretically, ignoring centric projections and
 systematic absences.

220_ALERT_2_B Large Non-Solvent  C  Ueq(max)/Ueq(min) ...   4.2 Ratio
Terminal methyl group C(30) exhibits libration which is normal for these
types of ligand groups.

;
 
_computing_data_collection        'Apex2 (2010-7) (Bruker, 2010)'
_computing_cell_refinement        'SAINT (8.27b) (Bruker, 2012)'
_computing_data_reduction         'SAINT (8.27b) (Bruker, 2012)'
_computing_structure_solution     'SHELXS-97 (Sheldrick, 2008)'
_computing_structure_refinement   'SHELXL-2012 (Sheldrick, 2012)'
_computing_molecular_graphics     'Bruker SHELXTL'
_computing_publication_material   'Bruker SHELXTL'
 
_refine_special_details
;
 ?
;
_refine_ls_structure_factor_coef  Fsqd
_refine_ls_matrix_type            full
_refine_ls_weighting_scheme       calc
_refine_ls_weighting_details
;
 w=1/[\s^2^(Fo^2^)+(0.0283P)^2^+3.9560P]
 where P=(Fo^2^+2Fc^2^)/3
;
_atom_sites_solution_primary      ?
_atom_sites_solution_secondary    ?
_atom_sites_solution_hydrogens    geom
_refine_ls_hydrogen_treatment     refu
_refine_ls_extinction_method      none
_refine_ls_extinction_coef        .
_refine_ls_number_reflns          5875
_refine_ls_number_parameters      325
_refine_ls_number_restraints      0
_refine_ls_R_factor_all           0.0221
_refine_ls_R_factor_gt            0.0207
_refine_ls_wR_factor_ref          0.0556
_refine_ls_wR_factor_gt           0.0548
_refine_ls_goodness_of_fit_ref    1.056
_refine_ls_restrained_S_all       1.056
_refine_ls_shift/su_max           0.003
_refine_ls_shift/su_mean          0.000
 
loop_
 _atom_site_label
 _atom_site_type_symbol
 _atom_site_fract_x
 _atom_site_fract_y
 _atom_site_fract_z
 _atom_site_U_iso_or_equiv
 _atom_site_adp_type
 _atom_site_occupancy
 _atom_site_site_symmetry_order  
 _atom_site_calc_flag
 _atom_site_refinement_flags_posn
 _atom_site_refinement_flags_adp
 _atom_site_refinement_flags_occupancy
 _atom_site_disorder_assembly
 _atom_site_disorder_group
Se1 Se 1.02475(2) 0.76122(2) 0.69609(2) 0.01783(4) Uani 1 1 d . . . . .
C1 C 0.91989(7) 0.72777(7) 0.64904(5) 0.0155(2) Uani 1 1 d . . . . .
C2 C 0.83769(7) 0.76198(7) 0.65956(5) 0.0168(2) Uani 1 1 d . . . . .
C3 C 0.76800(8) 0.73493(7) 0.61967(6) 0.0215(2) Uani 1 1 d . . . . .
H3 H 0.7121 0.7570 0.6264 0.026(4) Uiso 1 1 calc R . . . .
C4 C 0.77825(8) 0.67695(8) 0.57076(6) 0.0246(2) Uani 1 1 d . . . . .
H4 H 0.7295 0.6576 0.5458 0.033(4) Uiso 1 1 calc R . . . .
C5 C 0.86049(7) 0.64746(8) 0.55854(5) 0.0221(2) Uani 1 1 d . . . . .
H5 H 0.8681 0.6090 0.5242 0.030(4) Uiso 1 1 calc R . . . .
C6 C 0.93204(7) 0.67380(7) 0.59629(5) 0.0169(2) Uani 1 1 d . . . . .
C7 C 0.82034(7) 0.82869(7) 0.70845(5) 0.0177(2) Uani 1 1 d . . . . .
C8 C 0.76694(7) 0.81245(7) 0.76144(5) 0.0199(2) Uani 1 1 d . . . . .
C9 C 0.74965(8) 0.87664(8) 0.80503(6) 0.0255(2) Uani 1 1 d . . . . .
H9 H 0.7147 0.8661 0.8413 0.035(4) Uiso 1 1 calc R . . . .
C10 C 0.78258(9) 0.95486(8) 0.79603(6) 0.0289(3) Uani 1 1 d . . . . .
H10 H 0.7709 0.9976 0.8263 0.035(4) Uiso 1 1 calc R . . . .
C11 C 0.83285(8) 0.97116(8) 0.74269(6) 0.0265(3) Uani 1 1 d . . . . .
H11 H 0.8543 1.0256 0.7364 0.028(4) Uiso 1 1 calc R . . . .
C12 C 0.85256(7) 0.90945(7) 0.69809(6) 0.0208(2) Uani 1 1 d . . . . .
C13 C 0.72501(8) 0.72842(8) 0.77228(6) 0.0224(2) Uani 1 1 d . . . . .
H13 H 0.7501 0.6883 0.7410 0.021(3) Uiso 1 1 calc R . . . .
C14 C 0.74279(8) 0.69550(9) 0.84151(6) 0.0284(3) Uani 1 1 d . . . . .
H14A H 0.8054 0.6937 0.8506 0.037(4) Uiso 1 1 calc R . . . .
H14B H 0.7187 0.6397 0.8452 0.038(4) Uiso 1 1 calc R . . . .
H14C H 0.7157 0.7321 0.8730 0.046(5) Uiso 1 1 calc R . . . .
C15 C 0.62699(9) 0.73319(9) 0.75753(7) 0.0314(3) Uani 1 1 d . . . . .
H15A H 0.6013 0.6783 0.7629 0.039(4) Uiso 1 1 calc R . . . .
H15B H 0.6164 0.7522 0.7126 0.045(5) Uiso 1 1 calc R . . . .
H15C H 0.6008 0.7721 0.7877 0.049(5) Uiso 1 1 calc R . . . .
C16 C 0.90274(8) 0.93036(7) 0.63743(6) 0.0229(2) Uani 1 1 d . . . . .
H16 H 0.9354 0.8796 0.6252 0.026(4) Uiso 1 1 calc R . . . .
C17 C 0.96872(9) 0.99972(9) 0.64786(7) 0.0344(3) Uani 1 1 d . . . . .
H17A H 0.9384 1.0520 0.6550 0.046(5) Uiso 1 1 calc R . . . .
H17B H 1.0040 1.0046 0.6092 0.043(5) Uiso 1 1 calc R . . . .
H17C H 1.0062 0.9871 0.6860 0.049(5) Uiso 1 1 calc R . . . .
C18 C 0.84050(9) 0.95125(9) 0.57994(6) 0.0315(3) Uani 1 1 d . . . . .
H18A H 0.7986 0.9063 0.5737 0.041(5) Uiso 1 1 calc R . . . .
H18B H 0.8734 0.9580 0.5402 0.038(4) Uiso 1 1 calc R . . . .
H18C H 0.8098 1.0028 0.5892 0.039(4) Uiso 1 1 calc R . . . .
C19 C 1.01997(7) 0.65123(7) 0.57297(5) 0.0179(2) Uani 1 1 d . . . . .
C20 C 1.05800(8) 0.70426(8) 0.52740(5) 0.0218(2) Uani 1 1 d . . . . .
C21 C 1.13505(8) 0.67933(9) 0.49928(6) 0.0267(3) Uani 1 1 d . . . . .
H21 H 1.1623 0.7149 0.4694 0.036(4) Uiso 1 1 calc R . . . .
C22 C 1.17198(8) 0.60376(9) 0.51441(6) 0.0287(3) Uani 1 1 d . . . . .
H22 H 1.2227 0.5865 0.4934 0.038(4) Uiso 1 1 calc R . . . .
C23 C 1.13515(8) 0.55314(8) 0.56016(6) 0.0254(2) Uani 1 1 d . . . . .
H23 H 1.1614 0.5014 0.5705 0.028(4) Uiso 1 1 calc R . . . .
C24 C 1.06009(7) 0.57658(7) 0.59145(5) 0.0199(2) Uani 1 1 d . . . . .
C25 C 1.01689(8) 0.78624(8) 0.50704(6) 0.0257(2) Uani 1 1 d . . . . .
H25 H 0.9671 0.7963 0.5359 0.027(4) Uiso 1 1 calc R . . . .
C26 C 1.07987(11) 0.85835(9) 0.51644(8) 0.0396(3) Uani 1 1 d . . . . .
H26A H 1.1031 0.8585 0.5615 0.050(5) Uiso 1 1 calc R . . . .
H26B H 1.0495 0.9105 0.5075 0.046(5) Uiso 1 1 calc R . . . .
H26C H 1.1274 0.8523 0.4864 0.052(5) Uiso 1 1 calc R . . . .
C27 C 0.98100(10) 0.78291(10) 0.43652(7) 0.0358(3) Uani 1 1 d . . . . .
H27A H 1.0284 0.7723 0.4071 0.050(5) Uiso 1 1 calc R . . . .
H27B H 0.9536 0.8359 0.4252 0.042(5) Uiso 1 1 calc R . . . .
H27C H 0.9381 0.7384 0.4322 0.049(5) Uiso 1 1 calc R . . . .
C28 C 1.02557(8) 0.52219(7) 0.64500(6) 0.0233(2) Uani 1 1 d . . . . .
H28 H 0.9773 0.5526 0.6656 0.027(4) Uiso 1 1 calc R . . . .
C29 C 1.09538(10) 0.50567(12) 0.69788(7) 0.0439(4) Uani 1 1 d . . . . .
H29A H 1.0713 0.4714 0.7323 0.048(5) Uiso 1 1 calc R . . . .
H29B H 1.1155 0.5583 0.7166 0.083(8) Uiso 1 1 calc R . . . .
H29C H 1.1441 0.4767 0.6787 0.074(7) Uiso 1 1 calc R . . . .
C30 C 0.98931(17) 0.44196(12) 0.61756(9) 0.0649(6) Uani 1 1 d . . . . .
H30A H 1.0352 0.4114 0.5961 0.099(9) Uiso 1 1 calc R . . . .
H30B H 0.9424 0.4541 0.5857 0.085(8) Uiso 1 1 calc R . . . .
H30C H 0.9669 0.4084 0.6531 0.063(6) Uiso 1 1 calc R . . . .
 
loop_
 _atom_site_aniso_label
 _atom_site_aniso_U_11
 _atom_site_aniso_U_22
 _atom_site_aniso_U_33
 _atom_site_aniso_U_23
 _atom_site_aniso_U_13
 _atom_site_aniso_U_12
Se1 0.01289(6) 0.02647(7) 0.01404(6) 0.00045(4) -0.00108(4) -0.00086(4)
C1 0.0138(5) 0.0190(5) 0.0137(5) 0.0021(4) -0.0015(4) -0.0005(4)
C2 0.0158(5) 0.0192(5) 0.0153(5) 0.0022(4) 0.0006(4) 0.0005(4)
C3 0.0139(5) 0.0295(6) 0.0210(5) -0.0001(4) -0.0007(4) 0.0013(4)
C4 0.0172(5) 0.0347(7) 0.0216(5) -0.0040(5) -0.0030(4) -0.0043(5)
C5 0.0211(6) 0.0273(6) 0.0179(5) -0.0050(4) 0.0003(4) -0.0025(4)
C6 0.0163(5) 0.0189(5) 0.0156(5) 0.0018(4) 0.0018(4) -0.0009(4)
C7 0.0140(5) 0.0214(5) 0.0175(5) -0.0003(4) -0.0025(4) 0.0045(4)
C8 0.0164(5) 0.0238(5) 0.0195(5) 0.0006(4) -0.0014(4) 0.0051(4)
C9 0.0237(6) 0.0316(6) 0.0212(5) -0.0027(5) 0.0019(4) 0.0071(5)
C10 0.0309(7) 0.0278(6) 0.0279(6) -0.0084(5) -0.0018(5) 0.0084(5)
C11 0.0269(6) 0.0211(6) 0.0312(6) -0.0017(5) -0.0044(5) 0.0029(5)
C12 0.0169(5) 0.0225(5) 0.0229(5) 0.0016(4) -0.0038(4) 0.0033(4)
C13 0.0201(6) 0.0265(6) 0.0208(5) 0.0013(4) 0.0039(4) 0.0020(4)
C14 0.0268(6) 0.0353(7) 0.0235(6) 0.0064(5) 0.0041(5) 0.0018(5)
C15 0.0215(6) 0.0386(7) 0.0342(7) 0.0044(6) 0.0000(5) -0.0013(5)
C16 0.0216(6) 0.0213(5) 0.0257(6) 0.0043(4) -0.0007(4) 0.0016(4)
C17 0.0299(7) 0.0345(7) 0.0386(7) 0.0051(6) -0.0006(6) -0.0080(6)
C18 0.0306(7) 0.0359(7) 0.0278(6) 0.0087(5) -0.0044(5) -0.0015(5)
C19 0.0161(5) 0.0235(5) 0.0142(5) -0.0036(4) 0.0002(4) -0.0012(4)
C20 0.0206(5) 0.0281(6) 0.0169(5) -0.0012(4) 0.0005(4) -0.0029(4)
C21 0.0207(6) 0.0401(7) 0.0196(5) 0.0000(5) 0.0042(4) -0.0044(5)
C22 0.0174(6) 0.0457(8) 0.0232(6) -0.0078(5) 0.0035(4) 0.0026(5)
C23 0.0201(6) 0.0308(6) 0.0252(6) -0.0067(5) -0.0012(4) 0.0043(5)
C24 0.0175(5) 0.0239(5) 0.0181(5) -0.0040(4) -0.0010(4) -0.0004(4)
C25 0.0268(6) 0.0273(6) 0.0232(6) 0.0044(5) 0.0052(5) -0.0026(5)
C26 0.0465(9) 0.0334(7) 0.0387(8) 0.0053(6) 0.0005(6) -0.0122(6)
C27 0.0379(8) 0.0393(8) 0.0298(7) 0.0063(6) -0.0049(6) 0.0022(6)
C28 0.0218(6) 0.0233(6) 0.0247(6) 0.0010(5) 0.0000(4) 0.0013(4)
C29 0.0305(7) 0.0682(11) 0.0328(7) 0.0185(7) -0.0015(6) 0.0050(7)
C30 0.1085(18) 0.0446(10) 0.0417(9) -0.0023(8) 0.0035(11) -0.0430(11)
 
_geom_special_details
;
 All esds (except the esd in the dihedral angle between two l.s. planes)
 are estimated using the full covariance matrix.  The cell esds are taken
 into account individually in the estimation of esds in distances, angles
 and torsion angles; correlations between esds in cell parameters are only
 used when they are defined by crystal symmetry.  An approximate (isotropic)
 treatment of cell esds is used for estimating esds involving l.s. planes.
;
 
loop_
 _geom_bond_atom_site_label_1
 _geom_bond_atom_site_label_2
 _geom_bond_distance
 _geom_bond_site_symmetry_2
 _geom_bond_publ_flag
Se1 C1 1.9366(11) . ?
Se1 Se1 2.3637(3) 2_756 ?
C1 C6 1.4073(15) . ?
C1 C2 1.4096(15) . ?
C2 C3 1.4016(16) . ?
C2 C7 1.5027(15) . ?
C3 C4 1.3858(17) . ?
C3 H3 0.9500 . ?
C4 C5 1.3889(17) . ?
C4 H4 0.9500 . ?
C5 C6 1.3959(15) . ?
C5 H5 0.9500 . ?
C6 C19 1.5014(15) . ?
C7 C8 1.4110(16) . ?
C7 C12 1.4162(16) . ?
C8 C9 1.4013(16) . ?
C8 C13 1.5249(17) . ?
C9 C10 1.3781(19) . ?
C9 H9 0.9500 . ?
C10 C11 1.3880(19) . ?
C10 H10 0.9500 . ?
C11 C12 1.3940(17) . ?
C11 H11 0.9500 . ?
C12 C16 1.5259(16) . ?
C13 C14 1.5325(17) . ?
C13 C15 1.5379(18) . ?
C13 H13 1.0000 . ?
C14 H14A 0.9800 . ?
C14 H14B 0.9800 . ?
C14 H14C 0.9800 . ?
C15 H15A 0.9800 . ?
C15 H15B 0.9800 . ?
C15 H15C 0.9800 . ?
C16 C17 1.5265(18) . ?
C16 C18 1.5349(17) . ?
C16 H16 1.0000 . ?
C17 H17A 0.9800 . ?
C17 H17B 0.9800 . ?
C17 H17C 0.9800 . ?
C18 H18A 0.9800 . ?
C18 H18B 0.9800 . ?
C18 H18C 0.9800 . ?
C19 C24 1.4035(16) . ?
C19 C20 1.4109(16) . ?
C20 C21 1.4001(17) . ?
C20 C25 1.5226(18) . ?
C21 C22 1.380(2) . ?
C21 H21 0.9500 . ?
C22 C23 1.3820(19) . ?
C22 H22 0.9500 . ?
C23 C24 1.3972(16) . ?
C23 H23 0.9500 . ?
C24 C28 1.5175(16) . ?
C25 C26 1.5273(19) . ?
C25 C27 1.5328(18) . ?
C25 H25 1.0000 . ?
C26 H26A 0.9800 . ?
C26 H26B 0.9800 . ?
C26 H26C 0.9800 . ?
C27 H27A 0.9800 . ?
C27 H27B 0.9800 . ?
C27 H27C 0.9800 . ?
C28 C30 1.514(2) . ?
C28 C29 1.5284(18) . ?
C28 H28 1.0000 . ?
C29 H29A 0.9800 . ?
C29 H29B 0.9800 . ?
C29 H29C 0.9800 . ?
C30 H30A 0.9800 . ?
C30 H30B 0.9800 . ?
C30 H30C 0.9800 . ?
 
loop_
 _geom_angle_atom_site_label_1
 _geom_angle_atom_site_label_2
 _geom_angle_atom_site_label_3
 _geom_angle
 _geom_angle_site_symmetry_1
 _geom_angle_site_symmetry_3
 _geom_angle_publ_flag
C1 Se1 Se1 100.04(3) . 2_756 ?
C6 C1 C2 120.33(10) . . ?
C6 C1 Se1 115.17(8) . . ?
C2 C1 Se1 123.98(8) . . ?
C3 C2 C1 117.92(10) . . ?
C3 C2 C7 117.57(10) . . ?
C1 C2 C7 124.44(10) . . ?
C4 C3 C2 121.98(11) . . ?
C4 C3 H3 119.0 . . ?
C2 C3 H3 119.0 . . ?
C3 C4 C5 119.34(11) . . ?
C3 C4 H4 120.3 . . ?
C5 C4 H4 120.3 . . ?
C4 C5 C6 120.61(11) . . ?
C4 C5 H5 119.7 . . ?
C6 C5 H5 119.7 . . ?
C5 C6 C1 119.47(10) . . ?
C5 C6 C19 117.32(10) . . ?
C1 C6 C19 122.74(10) . . ?
C8 C7 C12 120.33(10) . . ?
C8 C7 C2 120.14(10) . . ?
C12 C7 C2 119.35(10) . . ?
C9 C8 C7 118.84(11) . . ?
C9 C8 C13 118.41(11) . . ?
C7 C8 C13 122.73(10) . . ?
C10 C9 C8 121.00(12) . . ?
C10 C9 H9 119.5 . . ?
C8 C9 H9 119.5 . . ?
C9 C10 C11 119.93(12) . . ?
C9 C10 H10 120.0 . . ?
C11 C10 H10 120.0 . . ?
C10 C11 C12 121.43(12) . . ?
C10 C11 H11 119.3 . . ?
C12 C11 H11 119.3 . . ?
C11 C12 C7 118.42(11) . . ?
C11 C12 C16 120.30(11) . . ?
C7 C12 C16 121.17(10) . . ?
C8 C13 C14 112.36(10) . . ?
C8 C13 C15 110.35(10) . . ?
C14 C13 C15 110.20(10) . . ?
C8 C13 H13 107.9 . . ?
C14 C13 H13 107.9 . . ?
C15 C13 H13 107.9 . . ?
C13 C14 H14A 109.5 . . ?
C13 C14 H14B 109.5 . . ?
H14A C14 H14B 109.5 . . ?
C13 C14 H14C 109.5 . . ?
H14A C14 H14C 109.5 . . ?
H14B C14 H14C 109.5 . . ?
C13 C15 H15A 109.5 . . ?
C13 C15 H15B 109.5 . . ?
H15A C15 H15B 109.5 . . ?
C13 C15 H15C 109.5 . . ?
H15A C15 H15C 109.5 . . ?
H15B C15 H15C 109.5 . . ?
C12 C16 C17 113.83(11) . . ?
C12 C16 C18 110.61(10) . . ?
C17 C16 C18 110.21(11) . . ?
C12 C16 H16 107.3 . . ?
C17 C16 H16 107.3 . . ?
C18 C16 H16 107.3 . . ?
C16 C17 H17A 109.5 . . ?
C16 C17 H17B 109.5 . . ?
H17A C17 H17B 109.5 . . ?
C16 C17 H17C 109.5 . . ?
H17A C17 H17C 109.5 . . ?
H17B C17 H17C 109.5 . . ?
C16 C18 H18A 109.5 . . ?
C16 C18 H18B 109.5 . . ?
H18A C18 H18B 109.5 . . ?
C16 C18 H18C 109.5 . . ?
H18A C18 H18C 109.5 . . ?
H18B C18 H18C 109.5 . . ?
C24 C19 C20 120.75(10) . . ?
C24 C19 C6 121.33(10) . . ?
C20 C19 C6 117.71(10) . . ?
C21 C20 C19 118.48(11) . . ?
C21 C20 C25 119.41(11) . . ?
C19 C20 C25 122.09(10) . . ?
C22 C21 C20 120.93(12) . . ?
C22 C21 H21 119.5 . . ?
C20 C21 H21 119.5 . . ?
C21 C22 C23 120.02(11) . . ?
C21 C22 H22 120.0 . . ?
C23 C22 H22 120.0 . . ?
C22 C23 C24 121.22(12) . . ?
C22 C23 H23 119.4 . . ?
C24 C23 H23 119.4 . . ?
C23 C24 C19 118.42(11) . . ?
C23 C24 C28 119.51(11) . . ?
C19 C24 C28 122.06(10) . . ?
C20 C25 C26 111.78(11) . . ?
C20 C25 C27 111.29(11) . . ?
C26 C25 C27 110.83(11) . . ?
C20 C25 H25 107.6 . . ?
C26 C25 H25 107.6 . . ?
C27 C25 H25 107.6 . . ?
C25 C26 H26A 109.5 . . ?
C25 C26 H26B 109.5 . . ?
H26A C26 H26B 109.5 . . ?
C25 C26 H26C 109.5 . . ?
H26A C26 H26C 109.5 . . ?
H26B C26 H26C 109.5 . . ?
C25 C27 H27A 109.5 . . ?
C25 C27 H27B 109.5 . . ?
H27A C27 H27B 109.5 . . ?
C25 C27 H27C 109.5 . . ?
H27A C27 H27C 109.5 . . ?
H27B C27 H27C 109.5 . . ?
C30 C28 C24 111.24(11) . . ?
C30 C28 C29 110.99(14) . . ?
C24 C28 C29 110.96(11) . . ?
C30 C28 H28 107.8 . . ?
C24 C28 H28 107.8 . . ?
C29 C28 H28 107.8 . . ?
C28 C29 H29A 109.5 . . ?
C28 C29 H29B 109.5 . . ?
H29A C29 H29B 109.5 . . ?
C28 C29 H29C 109.5 . . ?
H29A C29 H29C 109.5 . . ?
H29B C29 H29C 109.5 . . ?
C28 C30 H30A 109.5 . . ?
C28 C30 H30B 109.5 . . ?
H30A C30 H30B 109.5 . . ?
C28 C30 H30C 109.5 . . ?
H30A C30 H30C 109.5 . . ?
H30B C30 H30C 109.5 . . ?
 
loop_
 _geom_torsion_atom_site_label_1
 _geom_torsion_atom_site_label_2
 _geom_torsion_atom_site_label_3
 _geom_torsion_atom_site_label_4
 _geom_torsion
 _geom_torsion_site_symmetry_1
 _geom_torsion_site_symmetry_2
 _geom_torsion_site_symmetry_3
 _geom_torsion_site_symmetry_4
 _geom_torsion_publ_flag
C6 C1 C2 C3 5.49(16) . . . . ?
Se1 C1 C2 C3 176.79(8) . . . . ?
C6 C1 C2 C7 -171.30(10) . . . . ?
Se1 C1 C2 C7 0.00(15) . . . . ?
C1 C2 C3 C4 -0.54(17) . . . . ?
C7 C2 C3 C4 176.47(11) . . . . ?
C2 C3 C4 C5 -3.18(19) . . . . ?
C3 C4 C5 C6 1.96(19) . . . . ?
C4 C5 C6 C1 2.93(17) . . . . ?
C4 C5 C6 C19 -169.45(11) . . . . ?
C2 C1 C6 C5 -6.72(16) . . . . ?
Se1 C1 C6 C5 -178.75(8) . . . . ?
C2 C1 C6 C19 165.23(10) . . . . ?
Se1 C1 C6 C19 -6.79(14) . . . . ?
C3 C2 C7 C8 67.02(14) . . . . ?
C1 C2 C7 C8 -116.18(12) . . . . ?
C3 C2 C7 C12 -108.17(12) . . . . ?
C1 C2 C7 C12 68.63(15) . . . . ?
C12 C7 C8 C9 -2.78(16) . . . . ?
C2 C7 C8 C9 -177.93(10) . . . . ?
C12 C7 C8 C13 175.44(10) . . . . ?
C2 C7 C8 C13 0.29(16) . . . . ?
C7 C8 C9 C10 1.22(17) . . . . ?
C13 C8 C9 C10 -177.08(11) . . . . ?
C8 C9 C10 C11 0.78(19) . . . . ?
C9 C10 C11 C12 -1.25(19) . . . . ?
C10 C11 C12 C7 -0.30(18) . . . . ?
C10 C11 C12 C16 175.83(11) . . . . ?
C8 C7 C12 C11 2.33(16) . . . . ?
C2 C7 C12 C11 177.52(10) . . . . ?
C8 C7 C12 C16 -173.77(10) . . . . ?
C2 C7 C12 C16 1.42(16) . . . . ?
C9 C8 C13 C14 -53.61(14) . . . . ?
C7 C8 C13 C14 128.16(11) . . . . ?
C9 C8 C13 C15 69.81(14) . . . . ?
C7 C8 C13 C15 -108.43(12) . . . . ?
C11 C12 C16 C17 33.05(15) . . . . ?
C7 C12 C16 C17 -150.93(11) . . . . ?
C11 C12 C16 C18 -91.68(14) . . . . ?
C7 C12 C16 C18 84.34(13) . . . . ?
C5 C6 C19 C24 -88.79(13) . . . . ?
C1 C6 C19 C24 99.10(13) . . . . ?
C5 C6 C19 C20 85.97(13) . . . . ?
C1 C6 C19 C20 -86.15(13) . . . . ?
C24 C19 C20 C21 2.26(16) . . . . ?
C6 C19 C20 C21 -172.53(10) . . . . ?
C24 C19 C20 C25 -179.10(11) . . . . ?
C6 C19 C20 C25 6.12(16) . . . . ?
C19 C20 C21 C22 1.62(18) . . . . ?
C25 C20 C21 C22 -177.06(11) . . . . ?
C20 C21 C22 C23 -3.04(19) . . . . ?
C21 C22 C23 C24 0.56(19) . . . . ?
C22 C23 C24 C19 3.22(17) . . . . ?
C22 C23 C24 C28 -175.42(11) . . . . ?
C20 C19 C24 C23 -4.62(16) . . . . ?
C6 C19 C24 C23 169.98(10) . . . . ?
C20 C19 C24 C28 173.99(10) . . . . ?
C6 C19 C24 C28 -11.41(16) . . . . ?
C21 C20 C25 C26 -55.48(15) . . . . ?
C19 C20 C25 C26 125.88(13) . . . . ?
C21 C20 C25 C27 69.04(15) . . . . ?
C19 C20 C25 C27 -109.60(13) . . . . ?
C23 C24 C28 C30 -69.93(17) . . . . ?
C19 C24 C28 C30 111.47(16) . . . . ?
C23 C24 C28 C29 54.16(15) . . . . ?
C19 C24 C28 C29 -124.44(13) . . . . ?
 
_refine_diff_density_max    0.347
_refine_diff_density_min   -0.293
_refine_diff_density_rms    0.042

_shelxl_version_number 2012-5

_shelx_res_file
;
TITL BDR92Fmi in C2/c  JCF MERGE-I 15OCT2012
CELL  0.71073  15.4658  16.1684  20.5084   90.000   91.888   90.000
ZERR    4.00   0.0014   0.0015   0.0019   0.000   0.005   0.000
LATT 7
SYMM -X, Y, 1/2-Z
SFAC C  H  Se
UNIT 240  296  8
L.S. 19
OMIT -3 55.00
ACTA
BOND $H
FMAP 2
PLAN 20
SIZE 0.43 0.52 0.71
CONF
WPDB -2
HTAB
REM NEGATIVE EXTI 0.0001
TEMP -183.000
WGHT    0.028300    3.956000
FVAR       0.08456
SE1   3    1.024748    0.761215    0.696087    11.00000    0.01289    0.02647 =
         0.01404    0.00045   -0.00108   -0.00086
C1    1    0.919888    0.727773    0.649040    11.00000    0.01376    0.01898 =
         0.01369    0.00213   -0.00152   -0.00051
C2    1    0.837687    0.761985    0.659565    11.00000    0.01583    0.01918 =
         0.01534    0.00225    0.00057    0.00049
C3    1    0.768000    0.734925    0.619666    11.00000    0.01386    0.02949 =
         0.02098   -0.00013   -0.00074    0.00128
AFIX  43
H3    2    0.712057    0.756993    0.626353    11.00000    0.02622
AFIX   0
C4    1    0.778245    0.676950    0.570757    11.00000    0.01717    0.03469 =
         0.02157   -0.00399   -0.00302   -0.00431
AFIX  43
H4    2    0.729499    0.657568    0.545831    11.00000    0.03265
AFIX   0
C5    1    0.860490    0.647462    0.558542    11.00000    0.02110    0.02735 =
         0.01786   -0.00501    0.00034   -0.00252
AFIX  43
H5    2    0.868125    0.609014    0.524179    11.00000    0.03012
AFIX   0
C6    1    0.932035    0.673797    0.596291    11.00000    0.01628    0.01890 =
         0.01562    0.00180    0.00180   -0.00087
C7    1    0.820337    0.828689    0.708454    11.00000    0.01401    0.02144 =
         0.01754   -0.00030   -0.00252    0.00447
C8    1    0.766937    0.812448    0.761437    11.00000    0.01644    0.02376 =
         0.01949    0.00058   -0.00136    0.00509
C9    1    0.749648    0.876638    0.805032    11.00000    0.02367    0.03163 =
         0.02117   -0.00269    0.00194    0.00714
AFIX  43
H9    2    0.714695    0.866073    0.841344    11.00000    0.03478
AFIX   0
C10   1    0.782582    0.954860    0.796028    11.00000    0.03091    0.02782 =
         0.02788   -0.00838   -0.00179    0.00840
AFIX  43
H10   2    0.770892    0.997579    0.826297    11.00000    0.03497
AFIX   0
C11   1    0.832848    0.971163    0.742687    11.00000    0.02687    0.02109 =
         0.03121   -0.00168   -0.00443    0.00290
AFIX  43
H11   2    0.854283    1.025553    0.736435    11.00000    0.02768
AFIX   0
C12   1    0.852558    0.909453    0.698092    11.00000    0.01686    0.02249 =
         0.02290    0.00155   -0.00375    0.00331
C13   1    0.725009    0.728417    0.772284    11.00000    0.02014    0.02653 =
         0.02085    0.00132    0.00394    0.00201
AFIX  13
H13   2    0.750150    0.688318    0.740984    11.00000    0.02111
AFIX   0
C14   1    0.742789    0.695502    0.841506    11.00000    0.02678    0.03527 =
         0.02347    0.00637    0.00412    0.00179
AFIX 137
H14A  2    0.805359    0.693675    0.850634    11.00000    0.03699
H14B  2    0.718687    0.639700    0.845154    11.00000    0.03835
H14C  2    0.715691    0.732083    0.872998    11.00000    0.04584
AFIX   0
C15   1    0.626993    0.733186    0.757531    11.00000    0.02147    0.03856 =
         0.03422    0.00444   -0.00005   -0.00130
AFIX 137
H15A  2    0.601292    0.678302    0.762890    11.00000    0.03944
H15B  2    0.616435    0.752161    0.712588    11.00000    0.04472
H15C  2    0.600793    0.772133    0.787713    11.00000    0.04916
AFIX   0
C16   1    0.902745    0.930359    0.637425    11.00000    0.02164    0.02132 =
         0.02568    0.00430   -0.00075    0.00158
AFIX  13
H16   2    0.935406    0.879595    0.625202    11.00000    0.02589
AFIX   0
C17   1    0.968723    0.999721    0.647859    11.00000    0.02986    0.03446 =
         0.03863    0.00506   -0.00059   -0.00805
AFIX 137
H17A  2    0.938383    1.051981    0.655041    11.00000    0.04595
H17B  2    1.003965    1.004647    0.609202    11.00000    0.04269
H17C  2    1.006177    0.987063    0.686031    11.00000    0.04940
AFIX   0
C18   1    0.840501    0.951250    0.579940    11.00000    0.03056    0.03592 =
         0.02776    0.00869   -0.00443   -0.00149
AFIX 137
H18A  2    0.798552    0.906289    0.573667    11.00000    0.04105
H18B  2    0.873369    0.958042    0.540246    11.00000    0.03770
H18C  2    0.809841    1.002756    0.589203    11.00000    0.03938
AFIX   0
C19   1    1.019973    0.651231    0.572973    11.00000    0.01613    0.02350 =
         0.01418   -0.00364    0.00019   -0.00123
C20   1    1.058003    0.704260    0.527403    11.00000    0.02058    0.02808 =
         0.01688   -0.00119    0.00054   -0.00294
C21   1    1.135051    0.679332    0.499285    11.00000    0.02067    0.04008 =
         0.01965   -0.00003    0.00416   -0.00445
AFIX  43
H21   2    1.162285    0.714949    0.469368    11.00000    0.03569
AFIX   0
C22   1    1.171983    0.603761    0.514414    11.00000    0.01745    0.04574 =
         0.02320   -0.00784    0.00348    0.00263
AFIX  43
H22   2    1.222746    0.586524    0.493376    11.00000    0.03791
AFIX   0
C23   1    1.135152    0.553135    0.560163    11.00000    0.02013    0.03082 =
         0.02525   -0.00670   -0.00118    0.00434
AFIX  43
H23   2    1.161359    0.501437    0.570531    11.00000    0.02757
AFIX   0
C24   1    1.060086    0.576576    0.591450    11.00000    0.01755    0.02393 =
         0.01811   -0.00401   -0.00104   -0.00044
C25   1    1.016888    0.786243    0.507042    11.00000    0.02676    0.02734 =
         0.02320    0.00439    0.00520   -0.00255
AFIX  13
H25   2    0.967077    0.796282    0.535895    11.00000    0.02675
AFIX   0
C26   1    1.079868    0.858348    0.516445    11.00000    0.04654    0.03344 =
         0.03873    0.00527    0.00049   -0.01221
AFIX 137
H26A  2    1.103144    0.858461    0.561471    11.00000    0.05019
H26B  2    1.049462    0.910518    0.507529    11.00000    0.04603
H26C  2    1.127408    0.852332    0.486368    11.00000    0.05194
AFIX   0
C27   1    0.980996    0.782910    0.436525    11.00000    0.03788    0.03935 =
         0.02979    0.00634   -0.00486    0.00220
AFIX 137
H27A  2    1.028350    0.772288    0.407051    11.00000    0.05006
H27B  2    0.953570    0.835863    0.425200    11.00000    0.04208
H27C  2    0.938121    0.738446    0.432239    11.00000    0.04886
AFIX   0
C28   1    1.025570    0.522192    0.644997    11.00000    0.02175    0.02329 =
         0.02473    0.00099   -0.00003    0.00127
AFIX  13
H28   2    0.977266    0.552643    0.665609    11.00000    0.02749
AFIX   0
C29   1    1.095378    0.505675    0.697881    11.00000    0.03048    0.06816 =
         0.03276    0.01853   -0.00147    0.00499
AFIX 137
H29A  2    1.071315    0.471388    0.732266    11.00000    0.04766
H29B  2    1.115496    0.558327    0.716559    11.00000    0.08301
H29C  2    1.144083    0.476720    0.678726    11.00000    0.07415
AFIX   0
C30   1    0.989308    0.441962    0.617565    11.00000    0.10854    0.04465 =
         0.04166   -0.00232    0.00355   -0.04296
AFIX 137
H30A  2    1.035177    0.411429    0.596149    11.00000    0.09912
H30B  2    0.942376    0.454084    0.585725    11.00000    0.08515
H30C  2    0.966902    0.408449    0.653066    11.00000    0.06288
AFIX   0
HKLF 4

REM  BDR92Fmi in C2/c  JCF MERGE-I 15OCT2012
REM R1 =  0.0207 for    5579 Fo > 4sig(Fo)  and  0.0221 for all    5875 data
REM    325 parameters refined using      0 restraints

END

WGHT      0.0283      3.9526

REM No hydrogen bonds found for HTAB generation

REM Highest difference peak  0.347,  deepest hole -0.293,  1-sigma level  0.042
Q1    1   1.0392  0.7474  0.5197  11.00000  0.05    0.35
Q2    1   0.7450  0.7695  0.7658  11.00000  0.05    0.32
Q3    1   0.8798  0.7492  0.6520  11.00000  0.05    0.32
Q4    1   0.8028  0.7465  0.6407  11.00000  0.05    0.32
Q5    1   1.0429  0.5505  0.6172  11.00000  0.05    0.32
Q6    1   0.9803  0.6620  0.5863  11.00000  0.05    0.31
Q7    1   1.0285  0.7099  0.6972  11.00000  0.05    0.31
Q8    1   1.0397  0.6757  0.5495  11.00000  0.05    0.31
Q9    1   0.9631  0.7471  0.6709  11.00000  0.05    0.30
Q10   1   1.0191  0.7675  0.6561  11.00000  0.05    0.30
Q11   1   1.0415  0.6132  0.5842  11.00000  0.05    0.30
Q12   1   0.8426  0.8670  0.7059  11.00000  0.05    0.30
Q13   1   0.8300  0.7967  0.6855  11.00000  0.05    0.30
Q14   1   0.7851  0.8228  0.7287  11.00000  0.05    0.29
Q15   1   0.8765  0.9193  0.6689  11.00000  0.05    0.28
Q16   1   0.8960  0.6619  0.5791  11.00000  0.05    0.28
Q17   1   1.0058  0.8183  0.6956  11.00000  0.05    0.27
Q18   1   1.0000  0.7642  0.7500  10.50000  0.05    0.27
Q19   1   0.7584  0.8460  0.7794  11.00000  0.05    0.27
Q20   1   0.8738  0.9393  0.6116  11.00000  0.05    0.26
;
_shelx_res_checksum   99633

_shelx_hkl_file
;
   0  -4 -26   47.53    0.78
   2  -4 -26   21.63    0.42
  -1  -3 -26    0.78    0.16
   1  -3 -26    0.23    0.16
   3  -3 -26    3.42    0.32
  -2  -2 -26    7.12    0.27
   0  -2 -26   47.29    0.78
   2  -2 -26   13.78    0.47
   4  -2 -26   40.22    0.68
  -3  -1 -26    0.09    0.16
  -1  -1 -26    1.06    0.16
   1  -1 -26    0.27    0.15
   3  -1 -26    0.82    0.16
   5  -1 -26    4.35    0.35
  -2   0 -26    8.68    0.28
   0   0 -26   44.50    0.74
   2   0 -26   14.22    0.34
   4   0 -26   95.75    1.49
  -3   1 -26   -0.03    0.16
  -1   1 -26    0.84    0.16
   1   1 -26    0.02    0.15
   3   1 -26    0.43    0.16
   5   1 -26    3.83    0.36
  -2   2 -26    7.37    0.26
   0   2 -26   47.40    0.79
   2   2 -26   13.96    0.34
   4   2 -26   39.47    0.69
  -1   3 -26    0.80    0.13
   1   3 -26    0.53    0.17
   3   3 -26    3.15    0.25
   0   4 -26   46.79    0.79
   2   4 -26   20.98    0.44
  -1  -7 -25   18.72    0.55
   1  -7 -25    3.98    0.34
  -2  -6 -25    0.74    0.16
   0  -6 -25    2.56    0.20
   2  -6 -25    9.79    0.41
   4  -6 -25    4.07    0.35
  -3  -5 -25    0.30    0.16
  -1  -5 -25   24.03    0.46
   1  -5 -25    2.79    0.22
   3  -5 -25   20.58    0.57
  -4  -4 -25   -0.03    0.16
  -2  -4 -25    1.51    0.17
   0  -4 -25    3.79    0.22
   2  -4 -25    0.34    0.15
   6  -4 -25    5.08    0.37
  -5  -3 -25    1.54    0.18
  -3  -3 -25    1.09    0.16
  -1  -3 -25   14.67    0.34
   1  -3 -25   33.07    0.57
   3  -3 -25   37.16    0.90
   5  -3 -25   10.16    0.42
  -6  -2 -25    3.19    0.34
  -4  -2 -25    0.98    0.17
  -2  -2 -25    1.08    0.16
   0  -2 -25    0.27    0.15
   2  -2 -25    1.11    0.13
   4  -2 -25    0.21    0.15
   6  -2 -25    2.07    0.18
  -5  -1 -25   12.16    0.32
  -3  -1 -25    0.82    0.16
  -1  -1 -25    6.25    0.25
   1  -1 -25   27.07    0.39
   3  -1 -25   46.90    0.78
   5  -1 -25   44.76    0.75
   7  -1 -25   16.26    0.38
  -6   0 -25   -0.04    0.16
  -4   0 -25   -0.06    0.15
  -2   0 -25    0.17    0.15
   0   0 -25    0.03    0.12
   2   0 -25    0.15    0.15
   4   0 -25    0.17    0.16
   6   0 -25   -0.11    0.16
  -5   1 -25   11.76    0.32
  -3   1 -25    0.97    0.16
  -1   1 -25    6.43    0.20
   1   1 -25   25.85    0.39
   3   1 -25   47.09    0.78
   5   1 -25   44.60    0.75
   7   1 -25   16.93    0.38
  -6   2 -25    3.67    0.36
  -4   2 -25    1.02    0.16
  -2   2 -25    1.18    0.16
   0   2 -25    0.33    0.12
   2   2 -25    1.08    0.16
   4   2 -25    0.06    0.16
   6   2 -25    2.32    0.19
  -5   3 -25    1.60    0.17
  -3   3 -25    0.74    0.16
  -1   3 -25   14.51    0.27
   1   3 -25   32.63    0.58
   3   3 -25   37.08    0.65
   5   3 -25   10.55    0.31
   7   3 -25   25.24    0.70
  -4   4 -25    0.12    0.15
  -2   4 -25    1.20    0.13
   0   4 -25    3.74    0.24
   2   4 -25    0.38    0.16
   4   4 -25    0.09    0.16
   6   4 -25    4.99    0.27
  -3   5 -25    0.16    0.13
  -1   5 -25   23.88    0.37
   1   5 -25    2.50    0.19
   3   5 -25   20.93    0.43
   5   5 -25   26.69    0.52
  -2   6 -25    0.53    0.13
   0   6 -25    2.26    0.21
   2   6 -25    9.65    0.31
   4   6 -25    4.65    0.27
  -1   7 -25   18.48    0.60
   1   7 -25    3.44    0.26
   1  -9 -24    1.12    0.25
  -2  -8 -24    0.70    0.16
   0  -8 -24    8.73    0.40
   2  -8 -24    3.40    0.32
   4  -8 -24   17.40    0.53
  -5  -7 -24    1.83    0.24
  -3  -7 -24    4.16    0.24
  -1  -7 -24    0.24    0.15
   1  -7 -24    2.03    0.25
   3  -7 -24   11.09    0.41
   5  -7 -24   16.30    0.52
  -6  -6 -24   10.95    0.44
  -4  -6 -24    5.51    0.25
  -2  -6 -24    2.05    0.17
   0  -6 -24    2.39    0.19
   2  -6 -24    0.86    0.22
   4  -6 -24    9.30    0.38
   6  -6 -24   29.21    0.75
  -5  -5 -24   -0.06    0.16
  -3  -5 -24    1.65    0.16
  -1  -5 -24    0.18    0.14
   1  -5 -24    1.31    0.15
   3  -5 -24    0.98    0.22
   5  -5 -24    1.74    0.25
   7  -5 -24    5.45    0.37
  -6  -4 -24   16.54    0.38
  -4  -4 -24    1.88    0.17
  -2  -4 -24    4.77    0.23
   0  -4 -24    3.81    0.22
   2  -4 -24   23.09    0.43
   4  -4 -24   35.38    0.61
   6  -4 -24   28.76    0.75
   8  -4 -24   16.36    0.54
  -7  -3 -24    1.06    0.17
  -5  -3 -24   -0.10    0.15
  -3  -3 -24    3.70    0.23
  -1  -3 -24    0.44    0.14
   1  -3 -24    0.84    0.14
   3  -3 -24    2.68    0.16
   5  -3 -24    0.32    0.14
   7  -3 -24    0.73    0.24
  -6  -2 -24   39.97    0.68
  -4  -2 -24    6.17    0.25
  -2  -2 -24    0.20    0.14
   0  -2 -24    4.00    0.21
   2  -2 -24   13.79    0.25
   4  -2 -24   42.98    0.71
   6  -2 -24   26.61    0.49
   8  -2 -24   41.91    1.02
  -7  -1 -24   -0.06    0.16
  -5  -1 -24    6.65    0.26
  -3  -1 -24    9.57    0.28
  -1  -1 -24    1.03    0.15
   1  -1 -24    0.26    0.11
   3  -1 -24    0.76    0.15
   5  -1 -24    0.50    0.15
   7  -1 -24    1.28    0.16
   9  -1 -24    0.00    0.25
  -8   0 -24   10.58    0.32
  -6   0 -24   38.94    0.67
  -4   0 -24   17.54    0.37
  -2   0 -24   11.93    0.30
   0   0 -24   11.75    0.23
   2   0 -24   21.51    0.33
   4   0 -24   74.38    1.17
   6   0 -24   21.80    0.43
   8   0 -24   18.25    0.39
  -7   1 -24    0.07    0.16
  -5   1 -24    6.61    0.26
  -3   1 -24    9.86    0.28
  -1   1 -24    0.92    0.11
   1   1 -24    0.27    0.11
   3   1 -24    0.79    0.15
   5   1 -24    0.84    0.16
   7   1 -24    1.10    0.16
   9   1 -24    0.21    0.17
  -6   2 -24   39.46    0.68
  -4   2 -24    5.56    0.24
  -2   2 -24   -0.02    0.11
   0   2 -24    3.84    0.17
   2   2 -24   13.87    0.32
   4   2 -24   43.04    0.72
   6   2 -24   26.49    0.50
   8   2 -24   42.10    0.73
  -7   3 -24    1.00    0.17
  -5   3 -24    0.08    0.15
  -3   3 -24    4.05    0.18
  -1   3 -24    0.27    0.11
   1   3 -24    0.80    0.15
   3   3 -24    2.60    0.22
   5   3 -24    0.42    0.16
   7   3 -24    0.66    0.17
  -6   4 -24   16.37    0.37
  -4   4 -24    1.76    0.13
  -2   4 -24    4.81    0.18
   0   4 -24    3.71    0.17
   2   4 -24   22.42    0.44
   4   4 -24   35.97    0.63
   6   4 -24   29.29    0.55
   8   4 -24   16.01    0.38
  -5   5 -24   -0.07    0.12
  -3   5 -24    1.50    0.13
  -1   5 -24    0.32    0.12
   1   5 -24    1.21    0.16
   3   5 -24    0.83    0.16
   5   5 -24    1.69    0.18
   7   5 -24    5.37    0.27
  -6   6 -24   11.16    0.31
  -4   6 -24    5.69    0.20
  -2   6 -24    1.92    0.13
   0   6 -24    2.27    0.18
   2   6 -24    0.79    0.17
   4   6 -24    9.14    0.30
   6   6 -24   29.37    0.55
  -5   7 -24    1.92    0.17
  -3   7 -24    4.31    0.19
  -1   7 -24    0.08    0.16
   1   7 -24    1.90    0.18
   3   7 -24   10.87    0.32
   5   7 -24   17.55    0.40
  -2   8 -24    0.48    0.13
   0   8 -24    9.05    0.30
   2   8 -24    3.04    0.25
   4   8 -24   17.94    0.41
  -1   9 -24    0.45    0.25
   1   9 -24    0.96    0.18
  -2 -10 -23    0.17    0.25
   0 -10 -23   -0.18    0.24
   2 -10 -23    1.35    0.25
  -5  -9 -23   17.95    0.54
  -3  -9 -23    8.15    0.27
  -1  -9 -23    2.19    0.26
   1  -9 -23   -0.18    0.23
   3  -9 -23    9.99    0.41
   5  -9 -23    4.75    0.34
  -6  -8 -23    5.35    0.35
  -4  -8 -23   12.85    0.33
  -2  -8 -23    1.07    0.16
   0  -8 -23    0.43    0.23
   2  -8 -23    0.50    0.22
   4  -8 -23    8.31    0.38
   6  -8 -23    6.32    0.37
  -7  -7 -23   21.07    0.60
  -5  -7 -23    7.27    0.27
  -3  -7 -23   10.79    0.29
  -1  -7 -23    0.60    0.15
   1  -7 -23    0.15    0.21
   3  -7 -23    0.42    0.21
   5  -7 -23   10.79    0.41
   7  -7 -23   14.91    0.49
  -6  -6 -23    9.75    0.29
  -4  -6 -23    1.39    0.16
  -2  -6 -23    1.62    0.16
   0  -6 -23    1.39    0.15
   2  -6 -23    0.10    0.13
   4  -6 -23    0.14    0.19
   6  -6 -23    0.91    0.23
   8  -6 -23    0.75    0.24
  -7  -5 -23   14.85    0.36
  -5  -5 -23    7.88    0.27
  -3  -5 -23    1.08    0.15
  -1  -5 -23    0.56    0.14
   1  -5 -23    1.48    0.14
   3  -5 -23   27.43    0.48
   5  -5 -23    5.31    0.33
   7  -5 -23   30.71    0.77
   9  -5 -23   48.01    1.16
  -8  -4 -23    0.06    0.17
  -6  -4 -23    0.37    0.16
  -4  -4 -23    9.05    0.27
  -2  -4 -23    4.98    0.22
   0  -4 -23    4.90    0.21
   2  -4 -23    3.15    0.20
   4  -4 -23    0.96    0.11
   6  -4 -23    0.14    0.22
   8  -4 -23    8.26    0.40
  -9  -3 -23   42.60    1.03
  -7  -3 -23   29.86    0.54
  -5  -3 -23   26.75    0.49
  -3  -3 -23    7.89    0.25
  -1  -3 -23    4.99    0.21
   1  -3 -23    1.60    0.14
   3  -3 -23   11.67    0.23
   5  -3 -23   15.10    0.33
   7  -3 -23   40.18    0.97
   9  -3 -23   41.97    1.03
  -8  -2 -23    6.99    0.28
  -6  -2 -23    7.54    0.27
  -4  -2 -23    1.54    0.16
  -2  -2 -23    0.21    0.14
   0  -2 -23    2.89    0.19
   2  -2 -23    3.86    0.16
   4  -2 -23    6.13    0.23
   6  -2 -23    1.50    0.15
   8  -2 -23    0.10    0.24
  10  -2 -23    5.60    0.39
  -9  -1 -23   48.97    0.82
  -7  -1 -23   23.89    0.46
  -5  -1 -23   95.18    1.46
  -3  -1 -23    1.39    0.15
  -1  -1 -23    2.89    0.20
   1  -1 -23    3.15    0.15
   3  -1 -23    7.20    0.19
   5  -1 -23   16.57    0.35
   7  -1 -23   28.02    0.51
   9  -1 -23   34.43    0.88
  -8   0 -23    0.08    0.16
  -6   0 -23    0.16    0.15
  -4   0 -23    0.13    0.14
  -2   0 -23    0.15    0.13
   0   0 -23    0.47    0.11
   2   0 -23    0.04    0.10
   4   0 -23   -0.03    0.14
   6   0 -23   -0.18    0.14
   8   0 -23   -0.09    0.15
  10   0 -23    0.04    0.25
  -9   1 -23   49.20    0.82
  -7   1 -23   23.54    0.46
  -5   1 -23   95.25    1.46
  -3   1 -23    1.43    0.15
  -1   1 -23    2.88    0.16
   1   1 -23    2.97    0.16
   3   1 -23    7.44    0.24
   5   1 -23   15.67    0.35
   7   1 -23   27.96    0.51
   9   1 -23   34.99    0.62
  -8   2 -23    7.02    0.27
  -6   2 -23    7.51    0.26
  -4   2 -23    1.81    0.16
  -2   2 -23    0.22    0.11
   0   2 -23    2.76    0.16
   2   2 -23    4.02    0.21
   4   2 -23    5.96    0.24
   6   2 -23    1.43    0.16
   8   2 -23    0.21    0.16
  10   2 -23    5.79    0.27
  -9   3 -23   41.04    0.71
  -7   3 -23   28.99    0.53
  -5   3 -23   26.23    0.49
  -3   3 -23    7.96    0.20
  -1   3 -23    4.95    0.17
   1   3 -23    1.62    0.12
   3   3 -23   11.67    0.30
   5   3 -23   15.82    0.35
   7   3 -23   40.82    0.70
   9   3 -23   43.77    0.86
  -8   4 -23    0.11    0.16
  -6   4 -23    0.48    0.15
  -4   4 -23    8.87    0.21
  -2   4 -23    4.91    0.17
   0   4 -23    5.25    0.17
   2   4 -23    3.41    0.21
   4   4 -23    0.71    0.15
   6   4 -23    0.23    0.15
   8   4 -23    8.29    0.29
  10   4 -23    2.22    0.26
  -7   5 -23   14.65    0.35
  -5   5 -23    8.06    0.21
  -3   5 -23    1.14    0.12
  -1   5 -23    0.69    0.11
   1   5 -23    1.54    0.16
   3   5 -23   27.34    0.51
   5   5 -23    5.17    0.25
   7   5 -23   29.91    0.56
   9   5 -23   49.76    0.84
  -6   6 -23    9.39    0.23
  -4   6 -23    1.46    0.13
  -2   6 -23    1.42    0.12
   0   6 -23    1.45    0.16
   2   6 -23    0.22    0.15
   4   6 -23    0.11    0.16
   6   6 -23    0.89    0.17
   8   6 -23    1.08    0.18
  -7   7 -23   19.53    0.33
  -5   7 -23    7.17    0.21
  -3   7 -23   10.68    0.23
  -1   7 -23    0.76    0.12
   1   7 -23    0.27    0.16
   3   7 -23    0.28    0.16
   5   7 -23   10.76    0.32
   7   7 -23   15.10    0.37
  -6   8 -23    5.38    0.20
  -4   8 -23   12.72    0.26
  -2   8 -23    1.07    0.13
   0   8 -23    0.36    0.16
   2   8 -23    0.22    0.16
   4   8 -23    8.63    0.30
   6   8 -23    6.66    0.29
  -3   9 -23    8.09    0.28
  -1   9 -23    1.88    0.18
   1   9 -23    0.20    0.16
   3   9 -23    9.64    0.31
   5   9 -23    4.38    0.27
  -2  10 -23    0.05    0.17
   0  10 -23    0.00    0.17
   2  10 -23    1.43    0.18
   4  10 -23    4.59    0.40
  -3 -11 -22   18.52    0.58
  -1 -11 -22    2.09    0.28
   1 -11 -22    0.35    0.24
   3 -11 -22    2.83    0.28
  -4 -10 -22   14.27    0.34
  -2 -10 -22   11.41    0.45
   0 -10 -22    6.48    0.38
   2 -10 -22    0.23    0.23
   4 -10 -22    0.94    0.23
   6 -10 -22    0.41    0.23
  -5  -9 -22   19.08    0.40
  -3  -9 -22   14.66    0.34
  -1  -9 -22    0.37    0.23
   1  -9 -22    4.48    0.34
   3  -9 -22    0.12    0.21
   5  -9 -22    5.64    0.34
   7  -9 -22    0.86    0.17
  -6  -8 -22   23.47    0.46
  -4  -8 -22   12.29    0.31
  -2  -8 -22   19.10    0.38
   0  -8 -22    9.83    0.38
   2  -8 -22    8.01    0.36
   4  -8 -22   23.30    0.61
   6  -8 -22    9.87    0.28
   8  -8 -22   11.08    0.44
  -7  -7 -22   31.00    0.55
  -5  -7 -22   24.04    0.46
  -3  -7 -22   10.61    0.28
  -1  -7 -22    1.23    0.15
   1  -7 -22    2.22    0.17
   3  -7 -22    1.21    0.21
   5  -7 -22    6.08    0.23
   7  -7 -22    3.55    0.33
   9  -7 -22    2.38    0.27
  -8  -6 -22   70.71    1.11
  -6  -6 -22   66.70    1.04
  -4  -6 -22   16.21    0.35
  -2  -6 -22   19.50    0.38
   0  -6 -22    4.19    0.20
   2  -6 -22    0.49    0.13
   4  -6 -22    7.87    0.24
   6  -6 -22    4.67    0.32
   8  -6 -22   27.22    0.72
  10  -6 -22   41.20    1.01
  -9  -5 -22    1.69    0.18
  -7  -5 -22   25.72    0.48
  -5  -5 -22    4.34    0.23
  -3  -5 -22    3.84    0.21
  -1  -5 -22    4.37    0.21
   1  -5 -22   -0.05    0.12
   3  -5 -22    3.51    0.16
   5  -5 -22    0.22    0.13
   7  -5 -22    0.54    0.22
   9  -5 -22    1.67    0.25
 -10  -4 -22   53.13    1.25
  -8  -4 -22   50.85    0.83
  -6  -4 -22   34.73    0.60
  -4  -4 -22   26.64    0.48
  -2  -4 -22   24.98    0.45
   0  -4 -22   13.78    0.30
   2  -4 -22    1.39    0.11
   4  -4 -22    8.59    0.19
   6  -4 -22   16.28    0.50
   8  -4 -22   38.38    0.93
  10  -4 -22   70.15    1.58
  -9  -3 -22    2.82    0.25
  -7  -3 -22    9.35    0.29
  -5  -3 -22    3.47    0.22
  -3  -3 -22    5.63    0.22
  -1  -3 -22   17.04    0.35
   1  -3 -22    2.88    0.14
   3  -3 -22   13.80    0.24
   5  -3 -22   23.17    0.43
   7  -3 -22    0.45    0.21
   9  -3 -22   14.39    0.49
  11  -3 -22   -0.02    0.25
 -10  -2 -22   39.64    0.69
  -8  -2 -22   44.68    0.74
  -6  -2 -22   69.96    1.10
  -4  -2 -22   31.63    0.55
  -2  -2 -22   15.11    0.32
   0  -2 -22   23.15    0.34
   2  -2 -22    8.83    0.19
   4  -2 -22    0.46    0.10
   6  -2 -22   31.33    0.54
   8  -2 -22   35.60    0.88
  10  -2 -22   58.44    1.36
  -9  -1 -22    2.27    0.18
  -7  -1 -22    0.87    0.15
  -5  -1 -22    3.91    0.22
  -3  -1 -22    1.53    0.15
  -1  -1 -22    0.81    0.10
   1  -1 -22    0.22    0.10
   3  -1 -22    0.05    0.10
   5  -1 -22    0.86    0.14
   7  -1 -22    0.02    0.14
   9  -1 -22    2.21    0.19
  11  -1 -22    0.28    0.26
 -10   0 -22   43.26    0.73
  -8   0 -22   56.04    0.91
  -6   0 -22  116.02    1.76
  -4   0 -22   38.28    0.64
  -2   0 -22    7.83    0.18
   0   0 -22   61.97    0.79
   2   0 -22    1.28    0.11
   4   0 -22    2.18    0.19
   6   0 -22   12.16    0.29
   8   0 -22   18.56    0.38
  10   0 -22   61.33    1.00
  -9   1 -22    2.34    0.20
  -7   1 -22    0.79    0.16
  -5   1 -22    3.92    0.21
  -3   1 -22    1.64    0.11
  -1   1 -22    0.84    0.10
   1   1 -22    0.23    0.10
   3   1 -22   -0.01    0.13
   5   1 -22    0.68    0.13
   7   1 -22   -0.03    0.14
   9   1 -22    2.17    0.19
  11   1 -22    0.00    0.16
 -10   2 -22   40.44    0.69
  -8   2 -22   43.66    0.74
  -6   2 -22   69.50    1.09
  -4   2 -22   31.57    0.44
  -2   2 -22   15.24    0.26
   0   2 -22   22.83    0.34
   2   2 -22    8.85    0.19
   4   2 -22    0.35    0.14
   6   2 -22   31.01    0.55
   8   2 -22   35.67    0.62
  10   2 -22   58.96    0.96
  -9   3 -22    3.08    0.24
  -7   3 -22    9.88    0.28
  -5   3 -22    3.12    0.16
  -3   3 -22    5.63    0.17
  -1   3 -22   17.23    0.28
   1   3 -22    2.52    0.15
   3   3 -22   13.67    0.31
   5   3 -22   23.61    0.45
   7   3 -22    0.56    0.15
   9   3 -22   14.24    0.34
  11   3 -22    0.24    0.17
 -10   4 -22   52.39    0.87
  -8   4 -22   49.21    0.82
  -6   4 -22   34.03    0.48
  -4   4 -22   26.43    0.39
  -2   4 -22   24.45    0.36
   0   4 -22   13.78    0.24
   2   4 -22    1.28    0.15
   4   4 -22    8.16    0.26
   6   4 -22   16.39    0.36
   8   4 -22   39.12    0.67
  10   4 -22   69.61    1.19
  -9   5 -22    1.63    0.18
  -7   5 -22   25.36    0.38
  -5   5 -22    4.27    0.17
  -3   5 -22    3.74    0.16
  -1   5 -22    4.34    0.17
   1   5 -22    0.09    0.11
   3   5 -22    3.54    0.22
   5   5 -22    0.28    0.15
   7   5 -22    0.48    0.16
   9   5 -22    1.30    0.17
  -8   6 -22   68.81    0.89
  -6   6 -22   64.47    0.84
  -4   6 -22   16.17    0.28
  -2   6 -22   18.90    0.31
   0   6 -22    4.37    0.17
   2   6 -22    0.16    0.14
   4   6 -22    7.54    0.26
   6   6 -22    4.52    0.24
   8   6 -22   27.12    0.52
  10   6 -22   41.73    0.73
  -7   7 -22   29.93    0.44
  -5   7 -22   23.41    0.36
  -3   7 -22   10.53    0.22
  -1   7 -22    1.27    0.12
   1   7 -22    2.27    0.17
   3   7 -22    1.27    0.16
   5   7 -22    5.75    0.26
   7   7 -22    3.45    0.25
   9   7 -22    2.57    0.22
  -6   8 -22   22.94    0.36
  -4   8 -22   12.08    0.25
  -2   8 -22   18.87    0.31
   0   8 -22    9.35    0.29
   2   8 -22    7.67    0.27
   4   8 -22   22.59    0.46
   6   8 -22    9.82    0.30
   8   8 -22   10.68    0.33
  -5   9 -22   19.74    0.41
  -3   9 -22   14.71    0.35
  -1   9 -22    0.35    0.16
   1   9 -22    4.27    0.24
   3   9 -22   -0.01    0.16
   5   9 -22    5.42    0.27
   7   9 -22    1.08    0.18
  -4  10 -22   14.54    0.36
  -2  10 -22   11.35    0.32
   0  10 -22    7.01    0.28
   2  10 -22    0.46    0.17
   4  10 -22    0.87    0.18
   6  10 -22    0.44    0.18
  -3  11 -22   18.65    0.41
  -1  11 -22    2.00    0.19
   1  11 -22    0.19    0.17
   3  11 -22    3.29    0.26
   5  11 -22    0.99    0.27
  -2 -12 -21   15.32    0.53
   0 -12 -21    8.32    0.41
   2 -12 -21    0.32    0.25
   4 -12 -21    9.37    0.42
  -5 -11 -21    8.80    0.28
  -3 -11 -21    9.09    0.43
  -1 -11 -21   16.46    0.53
   1 -11 -21    1.48    0.25
   3 -11 -21    0.64    0.23
   5 -11 -21    0.93    0.24
  -6 -10 -21    4.73    0.24
  -4 -10 -21   34.18    0.60
  -2 -10 -21    9.71    0.42
   0 -10 -21    7.88    0.38
   2 -10 -21    0.15    0.22
   4 -10 -21    0.79    0.22
   6 -10 -21   -0.26    0.21
   8 -10 -21    0.20    0.25
  -7  -9 -21   11.20    0.31
  -5  -9 -21   19.50    0.40
  -3  -9 -21   20.76    0.41
  -1  -9 -21   30.85    0.59
   1  -9 -21   19.98    0.56
   3  -9 -21    0.89    0.21
   5  -9 -21    1.28    0.22
   7  -9 -21    5.42    0.24
   9  -9 -21    9.94    0.43
  -8  -8 -21   17.64    0.39
  -6  -8 -21   18.31    0.38
  -4  -8 -21    9.04    0.26
  -2  -8 -21   15.54    0.34
   0  -8 -21    9.98    0.26
   2  -8 -21    1.54    0.22
   4  -8 -21    0.01    0.19
   6  -8 -21   -0.03    0.14
   8  -8 -21    0.10    0.23
  -9  -7 -21   14.47    0.35
  -7  -7 -21   36.54    0.62
  -5  -7 -21   58.75    0.92
  -3  -7 -21   39.20    0.65
  -1  -7 -21   29.81    0.51
   1  -7 -21   12.59    0.29
   3  -7 -21    0.47    0.19
   5  -7 -21    2.12    0.17
   7  -7 -21    2.43    0.30
   9  -7 -21   20.34    0.61
 -10  -6 -21    1.65    0.18
  -8  -6 -21    1.90    0.17
  -6  -6 -21   18.41    0.38
  -4  -6 -21   21.98    0.42
  -2  -6 -21    7.59    0.23
   0  -6 -21    2.46    0.18
   2  -6 -21    0.09    0.12
   4  -6 -21    0.16    0.13
   6  -6 -21    0.83    0.14
   8  -6 -21    5.60    0.34
  10  -6 -21    0.39    0.25
  -9  -5 -21   60.90    0.97
  -7  -5 -21   54.07    0.87
  -5  -5 -21   88.54    1.35
  -3  -5 -21   62.72    0.98
  -1  -5 -21   31.30    0.53
   1  -5 -21   20.40    0.37
   3  -5 -21    0.46    0.10
   5  -5 -21    0.49    0.13
   7  -5 -21   18.27    0.51
   9  -5 -21   15.29    0.50
  11  -5 -21   31.84    0.83
 -10  -4 -21    0.47    0.17
  -8  -4 -21    4.13    0.23
  -6  -4 -21   27.33    0.50
  -4  -4 -21   12.52    0.29
  -2  -4 -21   23.88    0.43
   0  -4 -21    4.74    0.20
   2  -4 -21    0.64    0.10
   4  -4 -21   11.84    0.22
   6  -4 -21    1.31    0.21
   8  -4 -21    4.53    0.32
  10  -4 -21    0.72    0.24
  12  -4 -21    0.87    0.27
 -11  -3 -21   43.11    0.73
  -9  -3 -21   51.97    0.84
  -7  -3 -21   28.59    0.51
  -5  -3 -21   38.62    0.64
  -3  -3 -21   62.42    0.97
  -1  -3 -21   73.02    1.11
   1  -3 -21    8.73    0.18
   3  -3 -21   18.37    0.28
   5  -3 -21    2.43    0.14
   7  -3 -21   14.93    0.32
   9  -3 -21   29.30    0.76
  11  -3 -21   26.83    0.74
 -10  -2 -21    0.20    0.16
  -8  -2 -21    1.46    0.16
  -6  -2 -21    3.55    0.21
  -4  -2 -21   10.50    0.27
  -2  -2 -21    1.86    0.16
   0  -2 -21    0.98    0.10
   2  -2 -21    0.54    0.09
   4  -2 -21    2.07    0.13
   6  -2 -21    4.71    0.21
   8  -2 -21    5.25    0.22
  10  -2 -21   -0.05    0.23
  12  -2 -21    2.87    0.37
 -11  -1 -21   28.28    0.53
  -9  -1 -21   59.75    0.95
  -7  -1 -21   46.58    0.76
  -5  -1 -21   69.98    1.08
  -3  -1 -21    4.72    0.20
  -1  -1 -21  127.81    1.56
   1  -1 -21   13.25    0.23
   3  -1 -21   10.00    0.19
   5  -1 -21    2.64    0.18
   7  -1 -21    2.21    0.17
   9  -1 -21   56.24    0.91
  11  -1 -21   29.77    0.79
 -10   0 -21    0.17    0.16
  -8   0 -21    0.21    0.15
  -6   0 -21    0.10    0.13
  -4   0 -21    0.28    0.13
  -2   0 -21    0.14    0.09
   0   0 -21    1.13    0.10
   2   0 -21    0.15    0.09
   4   0 -21    0.08    0.12
   6   0 -21   -0.02    0.13
   8   0 -21    0.03    0.14
  10   0 -21   -0.04    0.15
  12   0 -21   -0.35    0.24
 -11   1 -21   28.65    0.53
  -9   1 -21   59.01    0.95
  -7   1 -21   45.82    0.76
  -5   1 -21   68.58    1.08
  -3   1 -21    4.32    0.15
  -1   1 -21  128.27    1.57
   1   1 -21   13.17    0.23
   3   1 -21    9.87    0.20
   5   1 -21    2.40    0.18
   7   1 -21    2.41    0.18
   9   1 -21   56.13    0.92
  11   1 -21   29.90    0.55
 -10   2 -21   -0.01    0.16
  -8   2 -21    1.33    0.16
  -6   2 -21    3.23    0.21
  -4   2 -21   10.59    0.21
  -2   2 -21    1.68    0.11
   0   2 -21    0.99    0.10
   2   2 -21    0.61    0.09
   4   2 -21    1.88    0.16
   6   2 -21    4.49    0.21
   8   2 -21    5.41    0.23
  10   2 -21   -0.06    0.15
  12   2 -21    3.21    0.24
 -11   3 -21   42.56    0.73
  -9   3 -21   50.30    0.83
  -7   3 -21   28.40    0.51
  -5   3 -21   37.83    0.51
  -3   3 -21   61.34    0.78
  -1   3 -21   71.28    0.90
   1   3 -21    8.51    0.19
   3   3 -21   18.39    0.36
   5   3 -21    2.32    0.19
   7   3 -21   14.88    0.33
   9   3 -21   30.12    0.54
  11   3 -21   27.95    0.53
 -10   4 -21    0.51    0.16
  -8   4 -21    4.08    0.23
  -6   4 -21   27.63    0.40
  -4   4 -21   12.34    0.23
  -2   4 -21   23.51    0.35
   0   4 -21    5.05    0.16
   2   4 -21    0.75    0.10
   4   4 -21   11.80    0.29
   6   4 -21    1.39    0.15
   8   4 -21    4.47    0.23
  10   4 -21    0.84    0.16
  12   4 -21    1.32    0.18
  -9   5 -21   60.22    0.97
  -7   5 -21   53.39    0.70
  -5   5 -21   86.80    1.09
  -3   5 -21   62.31    0.80
  -1   5 -21   30.50    0.43
   1   5 -21   20.15    0.31
   3   5 -21    0.39    0.13
   5   5 -21    0.21    0.14
   7   5 -21   16.97    0.37
   9   5 -21   15.33    0.36
  11   5 -21   31.49    0.59
 -10   6 -21    1.31    0.17
  -8   6 -21    1.83    0.13
  -6   6 -21   18.53    0.30
  -4   6 -21   22.13    0.34
  -2   6 -21    7.29    0.18
   0   6 -21    2.45    0.15
   2   6 -21    0.15    0.13
   4   6 -21   -0.05    0.14
   6   6 -21    0.70    0.15
   8   6 -21    5.92    0.25
  10   6 -21    0.18    0.17
  -9   7 -21   13.59    0.27
  -7   7 -21   35.14    0.50
  -5   7 -21   56.55    0.74
  -3   7 -21   38.81    0.53
  -1   7 -21   29.24    0.42
   1   7 -21   12.88    0.31
   3   7 -21    0.52    0.15
   5   7 -21    1.87    0.17
   7   7 -21    2.27    0.19
   9   7 -21   21.25    0.44
  11   7 -21    7.56    0.42
  -8   8 -21   17.44    0.31
  -6   8 -21   17.83    0.30
  -4   8 -21    8.32    0.21
  -2   8 -21   15.94    0.27
   0   8 -21    9.89    0.28
   2   8 -21    1.31    0.16
   4   8 -21    0.23    0.15
   6   8 -21   -0.18    0.15
   8   8 -21    0.10    0.17
  10   8 -21   15.84    0.38
  -7   9 -21   10.78    0.30
  -5   9 -21   19.29    0.40
  -3   9 -21   20.79    0.42
  -1   9 -21   31.99    0.57
   1   9 -21   20.33    0.42
   3   9 -21    0.85    0.16
   5   9 -21    1.18    0.17
   7   9 -21    5.77    0.27
   9   9 -21   10.07    0.32
  -6  10 -21    4.63    0.25
  -4  10 -21   34.55    0.61
  -2  10 -21    9.97    0.30
   0  10 -21    8.04    0.28
   2  10 -21    0.34    0.16
   4  10 -21    0.80    0.17
   6  10 -21   -0.05    0.16
   8  10 -21    0.50    0.18
  -5  11 -21    8.64    0.29
  -3  11 -21    8.50    0.29
  -1  11 -21   16.78    0.38
   1  11 -21    1.53    0.18
   3  11 -21    0.33    0.17
   5  11 -21    0.46    0.17
   7  11 -21    3.72    0.39
  -4  12 -21   31.60    0.58
  -2  12 -21   15.64    0.38
   0  12 -21    8.75    0.30
   2  12 -21   -0.04    0.17
   4  12 -21    9.55    0.31
   1  13 -21    2.98    0.39
  -3 -13 -20   22.52    0.64
  -1 -13 -20    5.51    0.38
   1 -13 -20   25.02    0.70
   3 -13 -20   10.13    0.43
  -6 -12 -20   20.24    0.57
  -4 -12 -20    0.21    0.25
  -2 -12 -20   47.96    1.12
   0 -12 -20   18.73    0.58
   2 -12 -20    8.98    0.41
   4 -12 -20    0.17    0.23
   6 -12 -20    0.04    0.23
  -7 -11 -20   10.67    0.30
  -5 -11 -20    9.09    0.28
  -3 -11 -20   36.91    0.89
  -1 -11 -20    7.04    0.37
   1 -11 -20   28.08    0.73
   3 -11 -20    6.51    0.36
   5 -11 -20    3.17    0.31
   7 -11 -20    0.17    0.23
  -8 -10 -20   13.00    0.33
  -6 -10 -20   14.00    0.33
  -4 -10 -20    8.57    0.26
  -2 -10 -20   16.09    0.35
   0 -10 -20    8.78    0.38
   2 -10 -20    8.47    0.37
   4 -10 -20    2.57    0.29
   6 -10 -20   -0.15    0.21
   8 -10 -20   21.53    0.42
  -9  -9 -20    1.30    0.17
  -7  -9 -20   23.17    0.44
  -5  -9 -20    3.87    0.22
  -3  -9 -20   11.19    0.28
  -1  -9 -20   20.93    0.40
   1  -9 -20   17.59    0.51
   3  -9 -20    5.18    0.31
   5  -9 -20    1.51    0.15
   7  -9 -20    6.30    0.24
   9  -9 -20    3.93    0.35
 -10  -8 -20    7.02    0.27
  -8  -8 -20   22.66    0.44
  -6  -8 -20   14.38    0.33
  -4  -8 -20   40.19    0.66
  -2  -8 -20   62.24    0.98
   0  -8 -20   32.91    0.55
   2  -8 -20   23.88    0.61
   4  -8 -20    5.65    0.21
   6  -8 -20    9.71    0.26
   8  -8 -20    2.91    0.33
 -11  -7 -20    0.38    0.22
  -9  -7 -20    5.87    0.25
  -7  -7 -20    6.59    0.25
  -5  -7 -20    0.94    0.14
  -3  -7 -20    6.79    0.23
  -1  -7 -20   16.38    0.33
   1  -7 -20   11.50    0.26
   3  -7 -20    5.13    0.20
   5  -7 -20    5.66    0.21
   7  -7 -20    0.89    0.14
   9  -7 -20    1.40    0.24
  11  -7 -20    1.32    0.27
 -10  -6 -20    2.12    0.18
  -8  -6 -20   27.34    0.49
  -6  -6 -20   53.34    0.84
  -4  -6 -20   72.77    1.12
  -2  -6 -20   42.79    0.69
   0  -6 -20   28.59    0.48
   2  -6 -20   51.04    0.65
   4  -6 -20    2.09    0.15
   6  -6 -20    0.08    0.12
   8  -6 -20    2.92    0.31
  10  -6 -20    0.87    0.24
  12  -6 -20    8.22    0.44
 -11  -5 -20    3.31    0.24
  -9  -5 -20    0.02    0.15
  -7  -5 -20    0.19    0.14
  -5  -5 -20   22.40    0.42
  -3  -5 -20   13.39    0.29
  -1  -5 -20    7.01    0.21
   1  -5 -20    4.21    0.16
   3  -5 -20    7.99    0.17
   5  -5 -20    3.84    0.19
   7  -5 -20    0.93    0.20
   9  -5 -20    0.03    0.21
  11  -5 -20   -0.05    0.24
 -12  -4 -20    2.80    0.22
 -10  -4 -20   16.87    0.37
  -8  -4 -20   18.22    0.38
  -6  -4 -20   70.52    1.09
  -4  -4 -20   68.13    1.04
  -2  -4 -20  130.09    1.92
   0  -4 -20   74.78    0.93
   2  -4 -20   92.82    1.13
   4  -4 -20    8.85    0.18
   6  -4 -20    3.12    0.14
   8  -4 -20    1.93    0.22
  10  -4 -20    0.83    0.23
  12  -4 -20   15.67    0.54
 -11  -3 -20    0.11    0.16
  -9  -3 -20    1.73    0.16
  -7  -3 -20    6.13    0.23
  -5  -3 -20   18.16    0.36
  -3  -3 -20    1.19    0.13
  -1  -3 -20   18.82    0.28
   1  -3 -20   -0.03    0.09
   3  -3 -20   13.67    0.23
   5  -3 -20    1.48    0.10
   7  -3 -20    0.16    0.12
   9  -3 -20    0.51    0.21
  11  -3 -20    1.56    0.25
  13  -3 -20   15.71    0.55
 -12  -2 -20    1.00    0.17
 -10  -2 -20    6.54    0.25
  -8  -2 -20   27.77    0.50
  -6  -2 -20   60.50    0.95
  -4  -2 -20    5.07    0.20
  -2  -2 -20  132.33    1.61
   0  -2 -20   43.12    0.55
   2  -2 -20   24.26    0.34
   4  -2 -20   24.77    0.35
   6  -2 -20    9.80    0.25
   8  -2 -20    0.66    0.13
  10  -2 -20    5.30    0.34
  12  -2 -20    1.10    0.25
 -11  -1 -20    0.94    0.17
  -9  -1 -20    0.96    0.15
  -7  -1 -20    0.06    0.14
  -5  -1 -20    6.12    0.22
  -3  -1 -20    3.51    0.14
  -1  -1 -20    1.28    0.13
   1  -1 -20    1.43    0.10
   3  -1 -20    8.08    0.17
   5  -1 -20   13.01    0.28
   7  -1 -20    1.25    0.13
   9  -1 -20    0.03    0.13
  11  -1 -20   -0.06    0.22
  13  -1 -20    0.56    0.26
 -12   0 -20    0.05    0.16
 -10   0 -20    7.31    0.26
  -8   0 -20   29.12    0.52
  -6   0 -20   83.73    1.29
  -4   0 -20   23.12    0.33
  -2   0 -20   69.99    0.88
   0   0 -20  161.02    1.95
   2   0 -20   72.23    0.89
   4   0 -20    4.81    0.15
   6   0 -20    0.13    0.12
   8   0 -20    0.19    0.13
  10   0 -20   25.75    0.48
  12   0 -20    1.57    0.25
 -11   1 -20    0.67    0.16
  -9   1 -20    1.10    0.15
  -7   1 -20    0.01    0.13
  -5   1 -20    6.29    0.17
  -3   1 -20    3.53    0.14
  -1   1 -20    0.91    0.17
   1   1 -20    1.39    0.10
   3   1 -20    8.08    0.17
   5   1 -20   12.80    0.29
   7   1 -20    1.41    0.14
   9   1 -20   -0.03    0.13
  11   1 -20   -0.08    0.15
  13   1 -20    0.39    0.25
 -12   2 -20    0.97    0.17
 -10   2 -20    6.16    0.25
  -8   2 -20   27.47    0.50
  -6   2 -20   60.55    0.77
  -4   2 -20    5.16    0.15
  -2   2 -20  132.49    1.62
   0   2 -20   42.31    0.55
   2   2 -20   23.19    0.34
   4   2 -20   24.51    0.44
   6   2 -20    9.86    0.26
   8   2 -20    0.81    0.14
  10   2 -20    5.12    0.23
  12   2 -20    1.15    0.17
 -11   3 -20    0.15    0.15
  -9   3 -20    1.85    0.16
  -7   3 -20    6.15    0.18
  -5   3 -20   18.27    0.29
  -3   3 -20    1.27    0.10
  -1   3 -20   18.99    0.29
   1   3 -20   -0.05    0.09
   3   3 -20   14.01    0.30
   5   3 -20    1.46    0.14
   7   3 -20    0.19    0.13
   9   3 -20    0.38    0.14
  11   3 -20    1.75    0.17
  13   3 -20   15.72    0.38
 -12   4 -20    2.67    0.21
 -10   4 -20   16.50    0.37
  -8   4 -20   18.49    0.33
  -6   4 -20   69.20    0.88
  -4   4 -20   66.42    0.85
  -2   4 -20  125.98    1.56
   0   4 -20   73.68    0.93
   2   4 -20   90.21    1.14
   4   4 -20    9.05    0.25
   6   4 -20    2.84    0.20
   8   4 -20    1.58    0.15
  10   4 -20    0.60    0.16
  12   4 -20   16.15    0.37
 -11   5 -20    3.11    0.23
  -9   5 -20   -0.11    0.14
  -7   5 -20    0.13    0.11
  -5   5 -20   22.21    0.34
  -3   5 -20   13.14    0.23
  -1   5 -20    6.91    0.17
   1   5 -20    4.12    0.15
   3   5 -20    7.77    0.24
   5   5 -20    4.11    0.21
   7   5 -20    0.88    0.15
   9   5 -20   -0.13    0.14
  11   5 -20   -0.06    0.16
  13   5 -20    1.94    0.25
 -10   6 -20    2.19    0.19
  -8   6 -20   26.67    0.40
  -6   6 -20   51.73    0.68
  -4   6 -20   71.31    0.91
  -2   6 -20   42.33    0.56
   0   6 -20   27.93    0.39
   2   6 -20   50.39    0.82
   4   6 -20    1.95    0.15
   6   6 -20    0.00    0.14
   8   6 -20    3.19    0.22
  10   6 -20    0.91    0.16
  12   6 -20    7.83    0.29
 -11   7 -20    0.52    0.23
  -9   7 -20    5.67    0.20
  -7   7 -20    6.68    0.19
  -5   7 -20    0.75    0.11
  -3   7 -20    6.94    0.18
  -1   7 -20   16.36    0.27
   1   7 -20   11.56    0.22
   3   7 -20    5.16    0.22
   5   7 -20    6.63    0.24
   7   7 -20    1.01    0.16
   9   7 -20    0.92    0.17
  11   7 -20    1.01    0.18
 -10   8 -20    6.43    0.26
  -8   8 -20   22.32    0.35
  -6   8 -20   14.26    0.26
  -4   8 -20   39.29    0.54
  -2   8 -20   61.91    0.80
   0   8 -20   32.60    0.57
   2   8 -20   24.13    0.46
   4   8 -20    5.52    0.23
   6   8 -20    9.48    0.28
   8   8 -20    3.26    0.23
  10   8 -20    4.91    0.26
  -9   9 -20    1.48    0.17
  -7   9 -20   23.02    0.45
  -5   9 -20    3.90    0.22
  -3   9 -20   11.44    0.29
  -1   9 -20   21.20    0.42
   1   9 -20   18.11    0.38
   3   9 -20    5.37    0.24
   5   9 -20    1.36    0.16
   7   9 -20    6.25    0.26
   9   9 -20    4.25    0.26
  -8  10 -20   12.88    0.33
  -6  10 -20   13.66    0.33
  -4  10 -20    8.26    0.27
  -2  10 -20   16.66    0.36
   0  10 -20    8.97    0.28
   2  10 -20    9.14    0.28
   4  10 -20    2.56    0.20
   6  10 -20    0.04    0.16
   8  10 -20   21.82    0.45
  -7  11 -20   10.69    0.31
  -5  11 -20    9.29    0.29
  -3  11 -20   36.71    0.64
  -1  11 -20    7.25    0.27
   1  11 -20   29.36    0.53
   3  11 -20    7.28    0.27
   5  11 -20    3.29    0.24
   7  11 -20    0.20    0.17
  -6  12 -20   19.88    0.43
  -4  12 -20    0.16    0.16
  -2  12 -20   47.72    0.81
   0  12 -20   20.45    0.42
   2  12 -20    9.05    0.30
   4  12 -20    0.40    0.17
   6  12 -20   -0.07    0.17
  -3  13 -20   21.29    0.44
  -1  13 -20    6.47    0.27
   1  13 -20   25.80    0.51
   3  13 -20   10.28    0.32
   5  13 -20   13.78    0.36
  -2 -14 -19   17.71    0.58
   0 -14 -19   14.17    0.52
   2 -14 -19    6.93    0.41
   4 -14 -19   22.16    0.64
  -5 -13 -19    0.94    0.27
  -3 -13 -19    7.33    0.40
  -1 -13 -19   28.18    0.76
   1 -13 -19   15.82    0.52
   3 -13 -19    8.23    0.41
   5 -13 -19    3.63    0.35
  -6 -12 -19    7.59    0.27
  -4 -12 -19   20.48    0.60
  -2 -12 -19   18.94    0.56
   0 -12 -19   21.19    0.59
   2 -12 -19   23.13    0.63
   4 -12 -19   24.47    0.65
   6 -12 -19    2.96    0.32
   8 -12 -19    3.34    0.24
  -9 -11 -19    1.02    0.22
  -7 -11 -19    6.74    0.26
  -5 -11 -19    3.65    0.21
  -3 -11 -19   20.05    0.39
  -1 -11 -19   28.97    0.74
   1 -11 -19   11.40    0.42
   3 -11 -19   16.72    0.50
   5 -11 -19    8.86    0.37
   7 -11 -19    1.14    0.16
   9 -11 -19    2.32    0.19
  -8 -10 -19    0.99    0.16
  -6 -10 -19    3.52    0.21
  -4 -10 -19   45.22    0.74
  -2 -10 -19    9.08    0.25
   0 -10 -19   24.39    0.63
   2 -10 -19   12.24    0.41
   4 -10 -19   11.63    0.40
   6 -10 -19    4.13    0.22
   8 -10 -19    1.20    0.16
  10 -10 -19    2.17    0.28
  -9  -9 -19   11.56    0.31
  -7  -9 -19    4.40    0.22
  -5  -9 -19   28.94    0.51
  -3  -9 -19   42.35    0.69
  -1  -9 -19   28.95    0.50
   1  -9 -19   15.49    0.46
   3  -9 -19   21.45    0.56
   5  -9 -19   33.00    0.55
   7  -9 -19    8.14    0.25
   9  -9 -19    0.67    0.24
  11  -9 -19    0.48    0.26
 -10  -8 -19    1.69    0.17
  -8  -8 -19   11.28    0.30
  -6  -8 -19    4.03    0.21
  -4  -8 -19    8.49    0.24
  -2  -8 -19   16.48    0.33
   0  -8 -19   18.71    0.35
   2  -8 -19    9.84    0.35
   4  -8 -19   29.81    0.50
   6  -8 -19    3.57    0.19
   8  -8 -19    0.10    0.14
  10  -8 -19    1.35    0.25
  12  -8 -19   -0.21    0.27
 -11  -7 -19    2.06    0.18
  -9  -7 -19   17.32    0.37
  -7  -7 -19   12.79    0.30
  -5  -7 -19    8.36    0.24
  -3  -7 -19   51.69    0.81
  -1  -7 -19   75.62    1.16
   1  -7 -19   12.05    0.26
   3  -7 -19   36.41    0.58
   5  -7 -19   25.30    0.43
   7  -7 -19    8.93    0.24
   9  -7 -19    0.08    0.23
  11  -7 -19    4.05    0.36
 -12  -6 -19    1.29    0.17
 -10  -6 -19   10.52    0.30
  -8  -6 -19    2.19    0.18
  -6  -6 -19    0.11    0.13
  -4  -6 -19    3.92    0.19
  -2  -6 -19    1.40    0.13
   0  -6 -19    6.23    0.20
   2  -6 -19    1.86    0.12
   4  -6 -19   12.35    0.22
   6  -6 -19    4.55    0.19
   8  -6 -19    0.02    0.20
  10  -6 -19    2.77    0.33
 -11  -5 -19    0.46    0.16
  -9  -5 -19    6.67    0.24
  -7  -5 -19    7.91    0.24
  -5  -5 -19   56.42    0.89
  -3  -5 -19   68.68    1.06
  -1  -5 -19  103.03    1.54
   1  -5 -19  166.73    1.99
   3  -5 -19   65.86    0.82
   5  -5 -19   35.86    0.48
   7  -5 -19    5.44    0.20
   9  -5 -19    1.13    0.22
  11  -5 -19    0.81    0.24
  13  -5 -19    0.98    0.27
 -12  -4 -19    1.35    0.17
 -10  -4 -19    0.35    0.15
  -8  -4 -19    0.95    0.14
  -6  -4 -19    2.98    0.19
  -4  -4 -19    5.27    0.20
  -2  -4 -19   21.26    0.38
   0  -4 -19    3.72    0.13
   2  -4 -19    1.19    0.09
   4  -4 -19   83.50    1.03
   6  -4 -19    2.17    0.13
   8  -4 -19    3.73    0.30
  10  -4 -19   -0.06    0.21
  12  -4 -19    2.21    0.27
 -13  -3 -19    5.09    0.26
 -11  -3 -19    0.10    0.15
  -9  -3 -19    2.03    0.16
  -7  -3 -19   22.92    0.42
  -5  -3 -19   30.75    0.52
  -3  -3 -19  102.81    1.55
  -1  -3 -19  133.33    1.60
   1  -3 -19   28.68    0.39
   3  -3 -19   33.02    0.44
   5  -3 -19   34.25    0.45
   7  -3 -19    4.06    0.18
   9  -3 -19    0.02    0.20
  11  -3 -19    0.34    0.23
  13  -3 -19    8.93    0.44
 -12  -2 -19   -0.03    0.15
 -10  -2 -19    0.09    0.14
  -8  -2 -19    5.51    0.22
  -6  -2 -19    4.96    0.20
  -4  -2 -19    0.63    0.12
  -2  -2 -19   10.86    0.19
   0  -2 -19   16.42    0.25
   2  -2 -19    7.33    0.16
   4  -2 -19    9.76    0.18
   6  -2 -19   10.69    0.25
   8  -2 -19   13.13    0.29
  10  -2 -19    1.49    0.22
  12  -2 -19   -0.04    0.23
  14  -2 -19    1.00    0.27
 -13  -1 -19    1.77    0.18
 -11  -1 -19    0.19    0.15
  -9  -1 -19    0.63    0.14
  -7  -1 -19   25.80    0.46
  -5  -1 -19   47.68    0.76
  -3  -1 -19  141.82    1.72
  -1  -1 -19  160.75    1.94
   1  -1 -19   73.89    0.91
   3  -1 -19   54.71    0.68
   5  -1 -19   17.35    0.26
   7  -1 -19    1.17    0.13
   9  -1 -19   -0.04    0.12
  11  -1 -19    0.44    0.22
  13  -1 -19    9.24    0.41
 -12   0 -19    0.26    0.16
 -10   0 -19   -0.06    0.14
  -8   0 -19    0.02    0.13
  -6   0 -19    0.14    0.12
  -4   0 -19    0.06    0.08
  -2   0 -19    0.38    0.08
   0   0 -19    1.60    0.13
   2   0 -19    0.27    0.08
   4   0 -19   -0.02    0.08
   6   0 -19    0.17    0.11
   8   0 -19    0.03    0.12
  10   0 -19    0.09    0.13
  12   0 -19   -0.01    0.22
  14   0 -19    0.09    0.26
 -13   1 -19    2.09    0.18
 -11   1 -19    0.49    0.15
  -9   1 -19    0.84    0.14
  -7   1 -19   25.57    0.46
  -5   1 -19   47.03    0.61
  -3   1 -19  142.06    1.73
  -1   1 -19  159.59    1.94
   1   1 -19   72.42    0.91
   3   1 -19   54.27    0.68
   5   1 -19   17.52    0.34
   7   1 -19    1.19    0.13
   9   1 -19    0.07    0.13
  11   1 -19   -0.03    0.14
  13   1 -19    8.24    0.29
 -12   2 -19    0.03    0.15
 -10   2 -19    0.16    0.14
  -8   2 -19    5.16    0.22
  -6   2 -19    4.93    0.15
  -4   2 -19    0.57    0.09
  -2   2 -19   10.41    0.19
   0   2 -19   15.93    0.25
   2   2 -19    7.17    0.16
   4   2 -19    9.96    0.24
   6   2 -19   10.61    0.26
   8   2 -19   13.03    0.30
  10   2 -19    2.21    0.18
  12   2 -19    0.14    0.15
  14   2 -19    0.85    0.17
 -13   3 -19    5.45    0.26
 -11   3 -19   -0.09    0.14
  -9   3 -19    1.76    0.15
  -7   3 -19   22.72    0.34
  -5   3 -19   30.68    0.42
  -3   3 -19  101.94    1.26
  -1   3 -19  130.35    1.61
   1   3 -19   28.26    0.39
   3   3 -19   32.82    0.44
   5   3 -19   34.83    0.58
   7   3 -19    4.20    0.20
   9   3 -19    0.15    0.13
  11   3 -19    0.26    0.14
  13   3 -19    9.03    0.29
 -12   4 -19    1.43    0.17
 -10   4 -19    0.52    0.15
  -8   4 -19    0.97    0.11
  -6   4 -19    3.28    0.15
  -4   4 -19    5.08    0.16
  -2   4 -19   20.45    0.31
   0   4 -19    3.85    0.14
   2   4 -19    1.22    0.09
   4   4 -19   83.59    1.30
   6   4 -19    2.22    0.18
   8   4 -19    4.06    0.21
  10   4 -19    0.02    0.14
  12   4 -19    2.74    0.23
  14   4 -19    7.45    0.39
 -11   5 -19    0.12    0.15
  -9   5 -19    6.41    0.19
  -7   5 -19    7.44    0.19
  -5   5 -19   55.80    0.72
  -3   5 -19   68.37    0.86
  -1   5 -19  100.72    1.25
   1   5 -19  161.65    2.00
   3   5 -19   64.65    1.02
   5   5 -19   36.23    0.61
   7   5 -19    5.29    0.22
   9   5 -19    1.45    0.15
  11   5 -19    0.85    0.16
  13   5 -19    1.02    0.17
 -12   6 -19    1.43    0.17
 -10   6 -19   10.55    0.23
  -8   6 -19    2.37    0.16
  -6   6 -19    0.07    0.10
  -4   6 -19    3.93    0.15
  -2   6 -19    1.56    0.10
   0   6 -19    6.26    0.16
   2   6 -19    1.65    0.10
   4   6 -19   12.79    0.29
   6   6 -19    4.84    0.21
   8   6 -19   -0.01    0.14
  10   6 -19    2.44    0.22
  12   6 -19    4.11    0.25
 -11   7 -19    1.93    0.14
  -9   7 -19   17.54    0.30
  -7   7 -19   12.12    0.24
  -5   7 -19    8.55    0.19
  -3   7 -19   50.79    0.66
  -1   7 -19   75.28    0.95
   1   7 -19   11.92    0.22
   3   7 -19   35.60    0.61
   5   7 -19   24.62    0.46
   7   7 -19    9.47    0.27
   9   7 -19    0.17    0.15
  11   7 -19    4.15    0.19
  13   7 -19    4.11    0.37
 -10   8 -19    1.87    0.17
  -8   8 -19   11.15    0.23
  -6   8 -19    3.89    0.16
  -4   8 -19    8.22    0.19
  -2   8 -19   16.41    0.27
   0   8 -19   18.70    0.37
   2   8 -19   10.08    0.27
   4   8 -19   29.40    0.52
   6   8 -19    3.14    0.21
   8   8 -19    0.04    0.15
  10   8 -19    2.73    0.23
  12   8 -19   -0.09    0.14
  -9   9 -19   11.56    0.31
  -7   9 -19    4.01    0.22
  -5   9 -19   27.90    0.51
  -3   9 -19   42.01    0.70
  -1   9 -19   28.34    0.52
   1   9 -19   16.21    0.35
   3   9 -19   22.02    0.42
   5   9 -19   32.99    0.58
   7   9 -19    8.15    0.27
   9   9 -19    1.19    0.17
  11   9 -19    0.50    0.17
  -8  10 -19    1.19    0.16
  -6  10 -19    3.22    0.22
  -4  10 -19   45.15    0.76
  -2  10 -19    8.94    0.27
   0  10 -19   24.92    0.47
   2  10 -19   12.05    0.31
   4  10 -19   11.63    0.30
   6  10 -19    4.68    0.24
   8  10 -19    1.14    0.17
  10  10 -19    2.37    0.21
  -9  11 -19    1.02    0.23
  -7  11 -19    6.73    0.26
  -5  11 -19    3.63    0.23
  -3  11 -19   19.27    0.40
  -1  11 -19   29.82    0.54
   1  11 -19   12.18    0.31
   3  11 -19   17.48    0.38
   5  11 -19    8.81    0.28
   7  11 -19    1.03    0.17
   9  11 -19    2.06    0.19
  -6  12 -19    8.10    0.28
  -4  12 -19   21.08    0.43
  -2  12 -19   18.94    0.40
   0  12 -19   20.99    0.43
   2  12 -19   23.27    0.46
   4  12 -19   25.38    0.49
   6  12 -19    2.58    0.22
   8  12 -19    3.15    0.26
  -5  13 -19    0.99    0.17
  -3  13 -19    7.65    0.27
  -1  13 -19   29.80    0.55
   1  13 -19   16.29    0.38
   3  13 -19    9.44    0.30
   5  13 -19    3.51    0.26
   7  13 -19    2.25    0.20
  -4  14 -19   11.17    0.46
  -2  14 -19   18.63    0.41
   0  14 -19   14.78    0.36
   2  14 -19    7.49    0.29
   4  14 -19   22.05    0.47
  -1 -15 -18   10.35    0.46
   1 -15 -18   26.72    0.74
   3 -15 -18   25.18    0.70
  -4 -14 -18    5.05    0.38
  -2 -14 -18    6.45    0.40
   0 -14 -18    5.47    0.38
   2 -14 -18    2.21    0.27
   4 -14 -18   17.72    0.55
   6 -14 -18   19.49    0.57
  -7 -13 -18    9.48    0.45
  -5 -13 -18    0.14    0.24
  -3 -13 -18   20.59    0.59
  -1 -13 -18   19.05    0.57
   1 -13 -18   14.42    0.49
   3 -13 -18   18.92    0.56
   5 -13 -18   15.54    0.49
   7 -13 -18    2.22    0.26
  -8 -12 -18    5.72    0.38
  -6 -12 -18    6.33    0.25
  -4 -12 -18    3.17    0.20
  -2 -12 -18   41.91    0.99
   0 -12 -18   18.79    0.55
   2 -12 -18   27.99    0.71
   4 -12 -18   21.56    0.59
   6 -12 -18    6.92    0.35
   8 -12 -18    1.33    0.17
  -9 -11 -18    0.20    0.24
  -7 -11 -18    2.27    0.19
  -5 -11 -18    1.61    0.15
  -3 -11 -18   17.49    0.35
  -1 -11 -18    4.36    0.32
   1 -11 -18   51.99    1.18
   3 -11 -18    7.04    0.34
   5 -11 -18   13.25    0.43
   7 -11 -18    2.58    0.18
   9 -11 -18    2.46    0.20
 -10 -10 -18    0.45    0.16
  -8 -10 -18    0.29    0.15
  -6 -10 -18    2.06    0.15
  -4 -10 -18   42.95    0.70
  -2 -10 -18   19.78    0.37
   0 -10 -18   13.96    0.44
   2 -10 -18   31.44    0.75
   4 -10 -18   21.69    0.57
   6 -10 -18   22.08    0.41
   8 -10 -18    5.20    0.23
  10 -10 -18   15.64    0.51
 -11  -9 -18    0.42    0.16
  -9  -9 -18    3.02    0.22
  -7  -9 -18    1.67    0.15
  -5  -9 -18   12.39    0.29
  -3  -9 -18   31.80    0.54
  -1  -9 -18    0.55    0.12
   1  -9 -18    6.06    0.31
   3  -9 -18   20.39    0.53
   5  -9 -18    6.95    0.22
   7  -9 -18    1.76    0.15
   9  -9 -18    2.09    0.18
  11  -9 -18    0.22    0.25
 -12  -8 -18    5.25    0.26
 -10  -8 -18    2.81    0.22
  -8  -8 -18   14.65    0.33
  -6  -8 -18   14.39    0.31
  -4  -8 -18   33.96    0.57
  -2  -8 -18   52.57    0.84
   0  -8 -18   54.73    0.86
   2  -8 -18   56.22    1.23
   4  -8 -18   39.94    0.63
   6  -8 -18   18.84    0.36
   8  -8 -18   21.73    0.40
  10  -8 -18    4.50    0.35
  12  -8 -18    1.41    0.28
 -11  -7 -18    0.15    0.15
  -9  -7 -18   15.24    0.34
  -7  -7 -18    8.70    0.25
  -5  -7 -18    6.92    0.22
  -3  -7 -18    0.90    0.12
  -1  -7 -18    9.81    0.23
   1  -7 -18   17.35    0.32
   3  -7 -18   16.30    0.25
   5  -7 -18    1.24    0.13
   7  -7 -18    5.29    0.20
   9  -7 -18    0.68    0.21
  11  -7 -18    0.88    0.25
 -12  -6 -18    8.70    0.29
 -10  -6 -18    7.30    0.26
  -8  -6 -18    4.45    0.21
  -6  -6 -18    1.03    0.13
  -4  -6 -18    1.35    0.12
  -2  -6 -18   39.50    0.63
   0  -6 -18   66.10    1.01
   2  -6 -18   70.61    0.86
   4  -6 -18   34.10    0.45
   6  -6 -18   54.82    0.84
   8  -6 -18    8.49    0.23
  10  -6 -18    0.48    0.23
  12  -6 -18    1.90    0.27
 -13  -5 -18    0.34    0.16
 -11  -5 -18    0.07    0.15
  -9  -5 -18    2.69    0.20
  -7  -5 -18    4.06    0.20
  -5  -5 -18    8.64    0.23
  -3  -5 -18    1.92    0.16
  -1  -5 -18    8.17    0.21
   1  -5 -18    2.21    0.12
   3  -5 -18   27.02    0.36
   5  -5 -18    1.56    0.09
   7  -5 -18    2.54    0.17
   9  -5 -18    2.81    0.30
  11  -5 -18    2.96    0.34
 -12  -4 -18   19.44    0.40
 -10  -4 -18    0.86    0.15
  -8  -4 -18    0.14    0.13
  -6  -4 -18   13.73    0.30
  -4  -4 -18   27.81    0.47
  -2  -4 -18   83.85    1.26
   0  -4 -18   79.88    0.98
   2  -4 -18  154.17    1.84
   4  -4 -18   15.77    0.24
   6  -4 -18   60.09    0.75
   8  -4 -18    4.62    0.30
  10  -4 -18    5.79    0.34
  12  -4 -18    2.85    0.34
  14  -4 -18    1.69    0.29
 -13  -3 -18    1.77    0.17
 -11  -3 -18    3.68    0.22
  -9  -3 -18    1.47    0.14
  -7  -3 -18    0.09    0.12
  -5  -3 -18    5.15    0.19
  -3  -3 -18   12.31    0.26
  -1  -3 -18   20.49    0.29
   1  -3 -18    5.50    0.14
   3  -3 -18   20.34    0.29
   5  -3 -18    0.70    0.09
   7  -3 -18   13.56    0.28
   9  -3 -18    0.86    0.20
  11  -3 -18    0.18    0.22
  13  -3 -18    0.36    0.25
 -14  -2 -18    3.64    0.25
 -12  -2 -18   13.28    0.33
 -10  -2 -18   11.17    0.29
  -8  -2 -18    1.59    0.14
  -6  -2 -18   22.44    0.41
  -4  -2 -18   64.04    0.99
  -2  -2 -18  163.06    1.96
   0  -2 -18   27.41    0.36
   2  -2 -18   86.58    1.05
   4  -2 -18   45.05    0.57
   6  -2 -18   13.13    0.21
   8  -2 -18    3.71    0.18
  10  -2 -18   16.35    0.51
  12  -2 -18    8.60    0.41
  14  -2 -18   13.60    0.50
 -13  -1 -18    0.56    0.16
 -11  -1 -18    0.45    0.15
  -9  -1 -18    0.31    0.13
  -7  -1 -18    6.67    0.22
  -5  -1 -18    6.85    0.21
  -3  -1 -18    7.44    0.16
  -1  -1 -18    3.63    0.12
   1  -1 -18    4.54    0.13
   3  -1 -18   14.28    0.22
   5  -1 -18    4.14    0.13
   7  -1 -18    9.32    0.23
   9  -1 -18    0.99    0.15
  11  -1 -18    2.77    0.19
  13  -1 -18    0.12    0.23
  15  -1 -18    0.15    0.26
 -14   0 -18   19.56    0.41
 -12   0 -18   -0.02    0.15
 -10   0 -18   16.81    0.35
  -8   0 -18    1.18    0.13
  -6   0 -18    7.38    0.22
  -4   0 -18   71.15    0.89
  -2   0 -18  175.36    2.12
   0   0 -18  180.01    2.16
   2   0 -18   97.54    1.19
   4   0 -18   44.94    0.57
   6   0 -18   11.91    0.26
   8   0 -18    3.87    0.19
  10   0 -18   20.43    0.39
  12   0 -18    1.39    0.15
  14   0 -18   33.74    0.87
 -13   1 -18    0.61    0.16
 -11   1 -18    0.61    0.15
  -9   1 -18    0.28    0.13
  -7   1 -18    6.91    0.22
  -5   1 -18    6.71    0.16
  -3   1 -18    7.17    0.16
  -1   1 -18    3.50    0.13
   1   1 -18    4.58    0.13
   3   1 -18   13.74    0.22
   5   1 -18    3.82    0.17
   7   1 -18    9.61    0.24
   9   1 -18    0.68    0.13
  11   1 -18    2.46    0.20
  13   1 -18    0.79    0.15
  15   1 -18    0.03    0.26
 -14   2 -18    4.08    0.25
 -12   2 -18   13.90    0.33
 -10   2 -18   11.48    0.29
  -8   2 -18    1.64    0.14
  -6   2 -18   22.80    0.33
  -4   2 -18   63.40    0.81
  -2   2 -18  160.45    1.96
   0   2 -18   26.66    0.37
   2   2 -18   85.39    1.05
   4   2 -18   44.48    0.57
   6   2 -18   13.00    0.28
   8   2 -18    4.10    0.19
  10   2 -18   17.90    0.36
  12   2 -18    9.47    0.27
  14   2 -18   13.87    0.35
 -13   3 -18    2.23    0.19
 -11   3 -18    4.14    0.22
  -9   3 -18    1.27    0.14
  -7   3 -18    0.18    0.09
  -5   3 -18    4.93    0.15
  -3   3 -18   11.92    0.21
  -1   3 -18   20.25    0.29
   1   3 -18    5.43    0.14
   3   3 -18   19.85    0.29
   5   3 -18    0.66    0.12
   7   3 -18   13.76    0.29
   9   3 -18    0.95    0.14
  11   3 -18    0.48    0.14
  13   3 -18    0.68    0.16
  15   3 -18    0.38    0.22
 -12   4 -18   18.92    0.39
 -10   4 -18    0.90    0.14
  -8   4 -18    0.51    0.10
  -6   4 -18   13.92    0.24
  -4   4 -18   26.78    0.38
  -2   4 -18   82.32    1.03
   0   4 -18   78.67    0.98
   2   4 -18  149.71    1.85
   4   4 -18   15.61    0.32
   6   4 -18   60.80    0.95
   8   4 -18    5.43    0.21
  10   4 -18    6.26    0.23
  12   4 -18    3.62    0.23
  14   4 -18    1.95    0.18
 -13   5 -18    0.44    0.16
 -11   5 -18    0.11    0.14
  -9   5 -18    2.68    0.15
  -7   5 -18    4.15    0.15
  -5   5 -18    8.65    0.18
  -3   5 -18    1.64    0.10
  -1   5 -18    7.97    0.17
   1   5 -18    2.01    0.12
   3   5 -18   26.13    0.37
   5   5 -18    1.43    0.13
   7   5 -18    2.86    0.19
   9   5 -18    2.95    0.20
  11   5 -18    3.37    0.22
  13   5 -18   21.21    0.44
 -12   6 -18    9.16    0.28
 -10   6 -18    7.68    0.20
  -8   6 -18    4.51    0.16
  -6   6 -18    1.06    0.10
  -4   6 -18    1.30    0.10
  -2   6 -18   38.78    0.52
   0   6 -18   65.18    0.83
   2   6 -18   68.11    0.87
   4   6 -18   33.23    0.57
   6   6 -18   54.87    0.88
   8   6 -18    8.70    0.26
  10   6 -18    1.19    0.15
  12   6 -18    3.09    0.23
  14   6 -18    2.33    0.21
 -11   7 -18    0.28    0.12
  -9   7 -18   15.35    0.27
  -7   7 -18    8.81    0.20
  -5   7 -18    6.92    0.17
  -3   7 -18    0.87    0.10
  -1   7 -18    9.56    0.19
   1   7 -18   17.24    0.27
   3   7 -18   16.23    0.33
   5   7 -18    1.11    0.14
   7   7 -18    5.34    0.22
   9   7 -18    1.67    0.12
  11   7 -18    1.26    0.13
  13   7 -18    3.73    0.20
 -12   8 -18    4.60    0.25
 -10   8 -18    2.57    0.21
  -8   8 -18   14.44    0.26
  -6   8 -18   14.59    0.25
  -4   8 -18   33.80    0.46
  -2   8 -18   53.68    0.69
   0   8 -18   55.29    0.88
   2   8 -18   56.12    0.91
   4   8 -18   39.63    0.67
   6   8 -18   19.00    0.38
   8   8 -18   21.70    0.43
  10   8 -18    4.08    0.19
  12   8 -18    2.15    0.16
 -11   9 -18    0.43    0.16
  -9   9 -18    3.09    0.21
  -7   9 -18    1.86    0.15
  -5   9 -18   12.68    0.30
  -3   9 -18   31.66    0.55
  -1   9 -18    0.65    0.13
   1   9 -18    6.36    0.23
   3   9 -18   20.49    0.40
   5   9 -18    6.33    0.24
   7   9 -18    1.55    0.16
   9   9 -18    2.01    0.17
  11   9 -18    0.17    0.16
 -10  10 -18    0.25    0.15
  -8  10 -18    0.18    0.14
  -6  10 -18    1.97    0.16
  -4  10 -18   42.24    0.71
  -2  10 -18   19.91    0.39
   0  10 -18   14.36    0.32
   2  10 -18   31.85    0.56
   4  10 -18   22.58    0.43
   6  10 -18   21.96    0.43
   8  10 -18    5.10    0.25
  10  10 -18   14.93    0.36
  -9  11 -18    0.03    0.15
  -7  11 -18    2.60    0.22
  -5  11 -18    1.58    0.16
  -3  11 -18   17.46    0.37
  -1  11 -18    5.07    0.23
   1  11 -18   52.65    0.86
   3  11 -18    7.37    0.25
   5  11 -18   13.25    0.33
   7  11 -18    2.48    0.20
   9  11 -18    3.02    0.25
  11  11 -18    0.92    0.26
  -8  12 -18    5.99    0.25
  -6  12 -18    6.47    0.25
  -4  12 -18    3.04    0.22
  -2  12 -18   42.52    0.72
   0  12 -18   18.39    0.39
   2  12 -18   28.17    0.52
   4  12 -18   22.07    0.44
   6  12 -18    7.28    0.27
   8  12 -18    1.22    0.18
  -7  13 -18   10.25    0.30
  -5  13 -18    0.40    0.16
  -3  13 -18   20.78    0.42
  -1  13 -18   18.65    0.40
   1  13 -18   15.41    0.36
   3  13 -18   19.57    0.41
   5  13 -18   15.81    0.37
   7  13 -18    2.27    0.19
  -6  14 -18    4.64    0.35
  -4  14 -18    5.15    0.25
  -2  14 -18    6.48    0.26
   0  14 -18    6.33    0.26
   2  14 -18    2.78    0.24
   4  14 -18   18.11    0.41
   6  14 -18   19.40    0.43
  -3  15 -18    3.61    0.25
  -1  15 -18    9.83    0.31
   1  15 -18   27.73    0.53
   3  15 -18   25.47    0.51
   0 -16 -17    5.98    0.40
  -5 -15 -17    0.04    0.26
  -3 -15 -17    6.57    0.40
  -1 -15 -17    4.50    0.37
   1 -15 -17    0.23    0.25
   3 -15 -17    0.41    0.25
   5 -15 -17    9.71    0.43
  -6 -14 -17   -0.15    0.25
  -4 -14 -17    0.63    0.25
  -2 -14 -17   28.32    0.72
   0 -14 -17    5.59    0.37
   2 -14 -17   18.19    0.56
   4 -14 -17   23.03    0.62
   6 -14 -17   15.59    0.50
   8 -14 -17    1.73    0.25
  -7 -13 -17    0.45    0.25
  -5 -13 -17    2.60    0.33
  -3 -13 -17    2.51    0.32
  -1 -13 -17    8.52    0.39
   1 -13 -17    1.82    0.24
   3 -13 -17   10.44    0.41
   5 -13 -17   19.53    0.56
   7 -13 -17    9.28    0.28
   9 -13 -17    6.88    0.27
  -8 -12 -17    3.36    0.34
  -6 -12 -17    4.09    0.34
  -4 -12 -17    0.18    0.13
  -2 -12 -17   13.96    0.46
   0 -12 -17   16.58    0.50
   2 -12 -17   17.75    0.52
   4 -12 -17   30.73    0.75
   6 -12 -17   19.00    0.37
   8 -12 -17    2.76    0.22
  10 -12 -17   10.76    0.30
  -9 -11 -17    0.29    0.23
  -7 -11 -17    0.00    0.14
  -5 -11 -17    0.88    0.13
  -3 -11 -17   26.54    0.47
  -1 -11 -17   22.81    0.61
   1 -11 -17    8.19    0.35
   3 -11 -17   22.60    0.59
   5 -11 -17   15.80    0.32
   7 -11 -17    7.11    0.24
   9 -11 -17   24.75    0.44
  11 -11 -17    3.07    0.37
 -10 -10 -17    1.76    0.16
  -8 -10 -17    0.39    0.14
  -6 -10 -17    0.36    0.13
  -4 -10 -17   19.87    0.37
  -2 -10 -17    2.26    0.15
   0 -10 -17   12.69    0.42
   2 -10 -17   14.34    0.44
   4 -10 -17   44.74    0.70
   6 -10 -17   22.85    0.41
   8 -10 -17    7.58    0.24
  10 -10 -17    0.14    0.15
  12 -10 -17    1.16    0.28
 -11  -9 -17   10.16    0.29
  -9  -9 -17   16.27    0.35
  -7  -9 -17   -0.18    0.12
  -5  -9 -17    7.72    0.23
  -3  -9 -17   39.22    0.64
  -1  -9 -17   13.10    0.28
   1  -9 -17   74.37    1.60
   3  -9 -17   54.14    0.83
   5  -9 -17   26.96    0.46
   7  -9 -17   15.08    0.31
   9  -9 -17   21.01    0.39
  11  -9 -17    9.32    0.43
  13  -9 -17    0.11    0.28
 -12  -8 -17   35.59    0.62
 -10  -8 -17   -0.03    0.14
  -8  -8 -17    0.08    0.13
  -6  -8 -17    0.59    0.13
  -4  -8 -17   14.29    0.30
  -2  -8 -17   20.34    0.37
   0  -8 -17   19.32    0.35
   2  -8 -17   16.44    0.25
   4  -8 -17   49.02    0.76
   6  -8 -17    5.74    0.20
   8  -8 -17   29.24    0.50
  10  -8 -17    1.99    0.24
  12  -8 -17    5.29    0.38
 -13  -7 -17   28.94    0.53
 -11  -7 -17    5.55    0.24
  -9  -7 -17   16.30    0.35
  -7  -7 -17    0.21    0.12
  -5  -7 -17    1.13    0.12
  -3  -7 -17   29.19    0.49
  -1  -7 -17   26.40    0.44
   1  -7 -17   60.64    0.75
   3  -7 -17   66.60    0.83
   5  -7 -17   41.68    0.65
   7  -7 -17   25.56    0.44
   9  -7 -17   15.89    0.33
  11  -7 -17    3.37    0.34
  13  -7 -17   -0.20    0.27
 -14  -6 -17    3.80    0.35
 -12  -6 -17    1.31    0.16
 -10  -6 -17    1.13    0.15
  -8  -6 -17    2.85    0.19
  -6  -6 -17   13.03    0.28
  -4  -6 -17    8.62    0.22
  -2  -6 -17    4.90    0.17
   0  -6 -17   24.08    0.33
   2  -6 -17   17.40    0.25
   4  -6 -17   13.54    0.22
   6  -6 -17    5.91    0.19
   8  -6 -17    8.15    0.22
  12  -6 -17    0.88    0.25
  14  -6 -17    0.77    0.28
 -13  -5 -17   35.59    0.62
 -11  -5 -17   20.37    0.40
  -9  -5 -17    5.22    0.21
  -7  -5 -17    5.96    0.21
  -5  -5 -17    1.12    0.12
  -3  -5 -17   31.90    0.52
  -1  -5 -17   44.04    0.61
   1  -5 -17   69.16    0.85
   3  -5 -17   47.15    0.59
   5  -5 -17  114.96    1.40
   7  -5 -17   67.06    1.02
   9  -5 -17   11.99    0.41
  11  -5 -17    5.39    0.35
  13  -5 -17    0.18    0.25
 -14  -4 -17    3.44    0.24
 -12  -4 -17    4.00    0.23
 -10  -4 -17    0.25    0.13
  -8  -4 -17    1.66    0.14
  -6  -4 -17    0.00    0.11
  -4  -4 -17    1.76    0.15
  -2  -4 -17    3.39    0.11
   0  -4 -17    0.54    0.07
   2  -4 -17    7.51    0.15
   4  -4 -17   59.57    0.73
   6  -4 -17    1.52    0.09
   8  -4 -17    7.89    0.34
  10  -4 -17    1.21    0.22
  12  -4 -17    2.87    0.33
  14  -4 -17    0.33    0.27
 -13  -3 -17   46.04    0.76
 -11  -3 -17   41.41    0.70
  -9  -3 -17    4.65    0.21
  -7  -3 -17    9.00    0.24
  -5  -3 -17   20.82    0.37
  -3  -3 -17   89.45    1.10
  -1  -3 -17   37.66    0.48
   1  -3 -17   34.82    0.45
   3  -3 -17  176.89    2.10
   5  -3 -17   75.26    0.92
   7  -3 -17   32.67    0.43
   9  -3 -17   76.09    1.68
  11  -3 -17    1.20    0.22
  13  -3 -17   -0.03    0.24
  15  -3 -17    0.82    0.28
 -14  -2 -17    0.05    0.16
 -12  -2 -17    0.06    0.14
 -10  -2 -17    5.41    0.22
  -8  -2 -17    0.64    0.12
  -6  -2 -17    5.62    0.19
  -4  -2 -17    0.37    0.07
  -2  -2 -17    4.55    0.12
   0  -2 -17   13.08    0.20
   2  -2 -17    1.23    0.09
   4  -2 -17    3.08    0.12
   6  -2 -17   11.51    0.19
   8  -2 -17    0.72    0.11
  10  -2 -17    0.72    0.12
  12  -2 -17    4.40    0.34
  14  -2 -17   -0.35    0.24
 -15  -1 -17   53.35    1.27
 -13  -1 -17   18.62    0.39
 -11  -1 -17   36.36    0.61
  -9  -1 -17    2.28    0.18
  -7  -1 -17    4.31    0.19
  -5  -1 -17    5.96    0.14
  -3  -1 -17   57.01    0.71
  -1  -1 -17  131.90    1.60
   1  -1 -17   97.79    1.18
   3  -1 -17   91.39    1.11
   5  -1 -17  229.16    2.73
   7  -1 -17   51.99    0.82
   9  -1 -17   80.38    1.24
  11  -1 -17    3.90    0.19
  13  -1 -17    1.39    0.24
  15  -1 -17   18.97    0.59
 -14   0 -17    0.19    0.16
 -12   0 -17    0.04    0.14
 -10   0 -17   -0.03    0.13
  -8   0 -17    0.03    0.11
  -6   0 -17    0.02    0.08
  -4   0 -17    0.00    0.07
  -2   0 -17   -0.04    0.07
   0   0 -17    0.55    0.07
   2   0 -17    0.05    0.07
   4   0 -17    0.03    0.07
   6   0 -17   -0.03    0.10
   8   0 -17   -0.05    0.11
  10   0 -17    0.04    0.12
  12   0 -17    0.09    0.13
  14   0 -17    0.17    0.24
 -15   1 -17   53.03    0.87
 -13   1 -17   18.89    0.39
 -11   1 -17   35.89    0.61
  -9   1 -17    2.38    0.18
  -7   1 -17    4.58    0.14
  -5   1 -17    5.94    0.14
  -3   1 -17   56.95    0.71
  -1   1 -17  131.25    1.60
   1   1 -17   96.54    1.18
   3   1 -17   90.78    1.11
   5   1 -17  225.02    2.73
   7   1 -17   52.61    0.83
   9   1 -17   81.00    1.25
  11   1 -17    3.41    0.20
  13   1 -17    1.09    0.15
  15   1 -17   19.26    0.60
 -14   2 -17   -0.04    0.16
 -12   2 -17   -0.03    0.14
 -10   2 -17    5.71    0.22
  -8   2 -17    0.68    0.09
  -6   2 -17    5.69    0.15
  -4   2 -17    0.45    0.08
  -2   2 -17    4.22    0.13
   0   2 -17   12.54    0.20
   2   2 -17    1.03    0.08
   4   2 -17    2.98    0.11
   6   2 -17   11.04    0.25
   8   2 -17    0.70    0.12
  10   2 -17    0.75    0.13
  12   2 -17    5.17    0.22
  14   2 -17    0.12    0.14
 -13   3 -17   46.32    0.76
 -11   3 -17   42.30    0.69
  -9   3 -17    4.89    0.15
  -7   3 -17    8.80    0.18
  -5   3 -17   20.98    0.30
  -3   3 -17   88.97    1.10
  -1   3 -17   36.76    0.48
   1   3 -17   33.89    0.45
   3   3 -17  172.72    2.10
   5   3 -17   74.87    1.16
   7   3 -17   33.16    0.55
   9   3 -17   77.10    1.20
  11   3 -17    1.57    0.15
  13   3 -17    0.10    0.15
  15   3 -17    0.83    0.16
 -14   4 -17    3.48    0.24
 -12   4 -17    4.01    0.22
 -10   4 -17    0.29    0.10
  -8   4 -17    1.67    0.11
  -6   4 -17    0.04    0.08
  -4   4 -17    1.53    0.11
  -2   4 -17    3.40    0.12
   0   4 -17    0.48    0.08
   2   4 -17    7.44    0.15
   4   4 -17   58.12    0.92
   6   4 -17    1.19    0.13
   8   4 -17    8.49    0.23
  10   4 -17    1.41    0.14
  12   4 -17    3.23    0.22
  14   4 -17    0.08    0.15
 -13   5 -17   34.82    0.61
 -11   5 -17   20.18    0.32
  -9   5 -17    5.12    0.16
  -7   5 -17    5.97    0.16
  -5   5 -17    1.17    0.09
  -3   5 -17   31.03    0.42
  -1   5 -17   43.95    0.57
   1   5 -17   67.59    0.85
   3   5 -17   46.00    0.59
   5   5 -17  114.66    1.75
   7   5 -17   67.78    1.06
   9   5 -17   12.73    0.29
  11   5 -17    5.77    0.23
  13   5 -17    0.57    0.15
  15   5 -17    6.28    0.28
 -14   6 -17    4.14    0.36
 -12   6 -17    1.44    0.13
 -10   6 -17    1.28    0.12
  -8   6 -17    3.11    0.15
  -6   6 -17   12.62    0.22
  -4   6 -17    8.81    0.18
  -2   6 -17    5.08    0.14
   0   6 -17   24.22    0.34
   2   6 -17   16.92    0.26
   4   6 -17   13.87    0.29
   6   6 -17    6.09    0.21
   8   6 -17    8.10    0.24
  10   6 -17    4.00    0.22
  12   6 -17    1.35    0.16
  14   6 -17    1.30    0.14
 -13   7 -17   28.86    0.76
 -11   7 -17    5.35    0.19
  -9   7 -17   16.24    0.27
  -7   7 -17    0.39    0.10
  -5   7 -17    1.38    0.10
  -3   7 -17   28.87    0.40
  -1   7 -17   26.05    0.36
   1   7 -17   59.12    0.75
   3   7 -17   66.51    1.04
   5   7 -17   41.11    0.68
   7   7 -17   25.36    0.38
   9   7 -17   16.76    0.28
  11   7 -17    3.85    0.18
  13   7 -17    0.15    0.13
 -12   8 -17   35.65    0.62
 -10   8 -17   -0.01    0.14
  -8   8 -17    0.29    0.11
  -6   8 -17    0.55    0.10
  -4   8 -17   13.93    0.24
  -2   8 -17   20.59    0.30
   0   8 -17   19.66    0.37
   2   8 -17   16.59    0.33
   4   8 -17   48.75    0.79
   6   8 -17    6.02    0.22
   8   8 -17   29.61    0.43
  10   8 -17    2.80    0.17
  12   8 -17    5.66    0.21
  14   8 -17    0.69    0.24
 -11   9 -17   10.11    0.29
  -9   9 -17   16.10    0.35
  -7   9 -17    0.10    0.13
  -5   9 -17    7.48    0.23
  -3   9 -17   38.67    0.65
  -1   9 -17   12.99    0.29
   1   9 -17   74.02    1.17
   3   9 -17   53.23    0.87
   5   9 -17   26.59    0.48
   7   9 -17   14.64    0.33
   9   9 -17   20.91    0.42
  11   9 -17    9.16    0.23
  13   9 -17    0.04    0.14
 -10  10 -17    1.42    0.16
  -8  10 -17   -0.10    0.14
  -6  10 -17    0.50    0.14
  -4  10 -17   19.17    0.38
  -2  10 -17    2.39    0.19
   0  10 -17   12.98    0.30
   2  10 -17   14.91    0.32
   4  10 -17   44.00    0.74
   6  10 -17   22.85    0.44
   8  10 -17    7.45    0.26
  10  10 -17   -0.02    0.16
  12  10 -17    2.12    0.16
 -11  11 -17    3.93    0.34
  -9  11 -17    0.32    0.15
  -7  11 -17    0.13    0.14
  -5  11 -17    0.63    0.14
  -3  11 -17   26.94    0.49
  -1  11 -17   23.16    0.44
   1  11 -17    8.38    0.25
   3  11 -17   22.95    0.44
   5  11 -17   15.57    0.35
   7  11 -17    7.25    0.26
   9  11 -17   22.99    0.46
  11  11 -17    2.06    0.19
 -10  12 -17    0.40    0.16
  -8  12 -17    3.47    0.22
  -6  12 -17    4.06    0.22
  -4  12 -17    0.21    0.14
  -2  12 -17   14.33    0.33
   0  12 -17   17.11    0.36
   2  12 -17   17.88    0.38
   4  12 -17   30.84    0.55
   6  12 -17   18.61    0.40
   8  12 -17    2.81    0.24
  10  12 -17   10.20    0.32
  -7  13 -17    0.41    0.15
  -5  13 -17    2.41    0.22
  -3  13 -17    2.55    0.21
  -1  13 -17    8.41    0.27
   1  13 -17    2.06    0.19
   3  13 -17   10.61    0.30
   5  13 -17   19.76    0.41
   7  13 -17    8.93    0.30
   9  13 -17    6.55    0.28
  -6  14 -17    0.15    0.16
  -4  14 -17    0.50    0.16
  -2  14 -17   26.86    0.51
   0  14 -17    5.81    0.25
   2  14 -17   19.59    0.41
   4  14 -17   22.02    0.45
   6  14 -17   15.58    0.37
   8  14 -17    1.73    0.19
  -5  15 -17   -0.07    0.16
  -3  15 -17    6.48    0.26
  -1  15 -17    4.40    0.25
   1  15 -17    0.05    0.16
   3  15 -17    0.21    0.17
   5  15 -17    9.41    0.31
  -2  16 -17    4.61    0.37
   0  16 -17    5.94    0.38
   2  16 -17   42.09    0.73
  -4 -16 -16   -0.24    0.26
  -2 -16 -16    0.48    0.27
   0 -16 -16    1.19    0.27
   2 -16 -16    0.06    0.25
   4 -16 -16    4.20    0.38
  -5 -15 -16    4.44    0.37
  -3 -15 -16    1.49    0.27
  -1 -15 -16    6.08    0.37
   1 -15 -16   20.13    0.61
   3 -15 -16   30.43    0.79
   5 -15 -16   19.14    0.56
   7 -15 -16   13.64    0.48
  -8 -14 -16    5.38    0.39
  -6 -14 -16    2.71    0.34
  -4 -14 -16   -0.20    0.23
  -2 -14 -16    0.05    0.23
   0 -14 -16    2.65    0.33
   2 -14 -16    3.07    0.32
   4 -14 -16    9.19    0.40
   6 -14 -16    1.54    0.24
   8 -14 -16    3.96    0.25
  -9 -13 -16    3.79    0.35
  -7 -13 -16    5.24    0.36
  -5 -13 -16    3.64    0.33
  -3 -13 -16    2.62    0.26
  -1 -13 -16   10.44    0.41
   1 -13 -16   15.39    0.48
   3 -13 -16   24.64    0.64
   5 -13 -16    8.29    0.37
   7 -13 -16   17.90    0.37
   9 -13 -16    8.89    0.28
 -10 -12 -16    2.81    0.28
  -8 -12 -16    2.00    0.25
  -6 -12 -16    0.60    0.23
  -4 -12 -16    0.79    0.21
  -2 -12 -16    2.71    0.29
   0 -12 -16    3.28    0.30
   2 -12 -16    3.70    0.30
   4 -12 -16   20.38    0.55
   6 -12 -16    3.04    0.21
   8 -12 -16   20.86    0.40
  10 -12 -16    6.40    0.26
 -11 -11 -16    1.62    0.26
  -9 -11 -16    1.59    0.24
  -7 -11 -16    2.12    0.17
  -5 -11 -16    0.86    0.13
  -3 -11 -16    2.44    0.17
  -1 -11 -16    0.58    0.20
   1 -11 -16   49.12    1.12
   3 -11 -16   41.86    0.96
   5 -11 -16   33.54    0.55
   7 -11 -16   23.53    0.42
   9 -11 -16   16.20    0.34
  11 -11 -16   12.16    0.31
 -12 -10 -16   20.08    0.58
 -10 -10 -16   56.49    1.28
  -8 -10 -16    3.29    0.20
  -6 -10 -16    8.64    0.24
  -4 -10 -16    1.33    0.12
  -2 -10 -16    7.77    0.21
   0 -10 -16   29.13    0.50
   2 -10 -16   36.16    0.83
   4 -10 -16   42.71    0.67
   6 -10 -16   36.21    0.58
   8 -10 -16   32.30    0.53
  10 -10 -16   26.15    0.47
  12 -10 -16    0.19    0.27
 -13  -9 -16   25.43    0.70
 -11  -9 -16    7.34    0.26
  -9  -9 -16    3.98    0.21
  -7  -9 -16    1.49    0.14
  -5  -9 -16    0.28    0.11
  -3  -9 -16    0.30    0.11
  -1  -9 -16   16.26    0.31
   1  -9 -16   48.67    0.77
   3  -9 -16   28.75    0.47
   5  -9 -16   26.43    0.45
   7  -9 -16   57.06    0.87
   9  -9 -16   23.29    0.42
  11  -9 -16    2.83    0.34
  13  -9 -16    3.98    0.39
 -12  -8 -16   18.20    0.38
 -10  -8 -16   37.87    0.64
  -8  -8 -16   17.48    0.35
  -6  -8 -16   13.73    0.29
  -4  -8 -16   11.31    0.25
  -2  -8 -16    0.54    0.10
   0  -8 -16   29.28    0.49
   2  -8 -16   88.36    1.07
   4  -8 -16   43.33    0.67
   6  -8 -16   14.05    0.28
   8  -8 -16   17.50    0.33
  10  -8 -16   12.90    0.30
  12  -8 -16   14.97    0.51
 -13  -7 -16   15.50    0.36
 -11  -7 -16   27.22    0.49
  -9  -7 -16   19.90    0.39
  -7  -7 -16    8.31    0.23
  -5  -7 -16    3.86    0.17
  -3  -7 -16    5.19    0.18
  -1  -7 -16   43.87    0.69
   1  -7 -16   57.50    0.72
   3  -7 -16   37.81    0.49
   5  -7 -16   15.74    0.30
   7  -7 -16   30.45    0.50
   9  -7 -16   13.81    0.29
  11  -7 -16   28.39    0.74
  13  -7 -16    1.29    0.27
 -14  -6 -16   40.21    0.69
 -12  -6 -16   27.68    0.50
 -10  -6 -16   39.37    0.66
  -8  -6 -16   10.57    0.26
  -6  -6 -16   20.85    0.38
  -4  -6 -16   35.41    0.58
  -2  -6 -16   28.62    0.47
   0  -6 -16   31.92    0.41
   2  -6 -16   55.21    0.68
   4  -6 -16   54.40    0.68
   6  -6 -16  114.23    1.69
   8  -6 -16   46.85    0.74
  10  -6 -16   49.37    1.15
  12  -6 -16    4.93    0.35
  14  -6 -16    0.05    0.26
 -15  -5 -16    4.83    0.37
 -13  -5 -16    3.50    0.23
 -11  -5 -16    0.22    0.13
  -9  -5 -16    4.40    0.20
  -7  -5 -16    1.75    0.13
  -5  -5 -16    7.02    0.20
  -3  -5 -16   10.13    0.22
  -1  -5 -16    4.04    0.11
   1  -5 -16   20.06    0.28
   3  -5 -16   44.69    0.56
   5  -5 -16    0.46    0.08
   7  -5 -16   15.44    0.30
   9  -5 -16    0.82    0.19
  11  -5 -16    9.06    0.39
  13  -5 -16   -0.09    0.25
  15  -5 -16    7.82    0.43
 -14  -4 -16   57.22    0.92
 -12  -4 -16   47.11    0.77
 -10  -4 -16   44.32    0.73
  -8  -4 -16   16.08    0.32
  -6  -4 -16    6.05    0.19
  -4  -4 -16   10.18    0.23
  -2  -4 -16   13.21    0.20
   0  -4 -16   25.04    0.33
   2  -4 -16  121.62    1.45
   4  -4 -16   67.91    0.83
   6  -4 -16   88.46    1.08
   8  -4 -16   52.71    0.68
 -15  -3 -16    2.60    0.21
 -13  -3 -16    6.66    0.25
 -11  -3 -16    2.05    0.17
  -9  -3 -16    4.89    0.20
  -7  -3 -16    1.08    0.12
  -5  -3 -16   15.73    0.31
  -3  -3 -16    3.20    0.11
  -1  -3 -16   10.78    0.17
   1  -3 -16    9.24    0.16
   3  -3 -16   60.35    0.74
   5  -3 -16    6.89    0.14
   7  -3 -16    1.98    0.11
   9  -3 -16    1.13    0.12
  11  -3 -16    9.64    0.39
  13  -3 -16    0.78    0.24
 -14  -2 -16   49.26    0.81
 -12  -2 -16   82.27    1.27
 -10  -2 -16   51.39    0.83
  -8  -2 -16   16.55    0.33
  -6  -2 -16    0.19    0.10
  -4  -2 -16   11.08    0.18
  -2  -2 -16   23.97    0.32
   0  -2 -16   42.68    0.53
   2  -2 -16  139.30    1.67
   4  -2 -16  208.11    2.47
   6  -2 -16  113.42    1.38
   8  -2 -16  169.75    2.59
  10  -2 -16   76.94    1.18
  12  -2 -16    0.63    0.22
  14  -2 -16    1.30    0.25
  16  -2 -16   -0.01    0.27
 -15  -1 -16    0.24    0.16
 -13  -1 -16    5.37    0.23
 -11  -1 -16    0.88    0.14
  -9  -1 -16    1.78    0.13
  -7  -1 -16    0.02    0.10
  -5  -1 -16    2.61    0.11
  -3  -1 -16   25.91    0.35
  -1  -1 -16    4.23    0.11
   1  -1 -16    0.94    0.07
   3  -1 -16    0.77    0.07
   5  -1 -16    1.19    0.08
   7  -1 -16   17.51    0.32
   9  -1 -16    6.19    0.20
  11  -1 -16    0.80    0.12
  13  -1 -16    3.35    0.32
  15  -1 -16    0.07    0.25
 -14   0 -16   50.29    0.82
 -12   0 -16   94.35    1.44
 -10   0 -16   55.21    0.87
  -8   0 -16    2.18    0.16
  -6   0 -16    2.02    0.11
  -4   0 -16    1.97    0.10
  -2   0 -16    1.41    0.09
   0   0 -16  107.43    1.31
   2   0 -16   87.92    1.08
   4   0 -16  137.46    1.67
   6   0 -16  275.58    3.31
   8   0 -16  328.76    4.90
  10   0 -16   90.11    1.38
  12   0 -16   12.52    0.29
  14   0 -16   10.13    0.42
  16   0 -16    0.58    0.27
 -15   1 -16    0.19    0.16
 -13   1 -16    5.35    0.23
 -11   1 -16    0.79    0.14
  -9   1 -16    1.78    0.13
  -7   1 -16   -0.03    0.08
  -5   1 -16    2.58    0.11
  -3   1 -16   26.34    0.35
  -1   1 -16    4.36    0.12
   1   1 -16    0.75    0.07
   3   1 -16    0.70    0.07
   5   1 -16    1.13    0.08
   7   1 -16   17.46    0.33
   9   1 -16    6.18    0.20
  11   1 -16    0.85    0.13
  13   1 -16    3.05    0.21
  15   1 -16   -0.02    0.24
 -14   2 -16   49.09    0.80
 -12   2 -16   82.77    1.27
 -10   2 -16   52.04    0.82
  -8   2 -16   16.89    0.26
  -6   2 -16    0.35    0.08
  -4   2 -16   11.20    0.19
  -2   2 -16   23.49    0.32
   0   2 -16   41.24    0.53
   2   2 -16  137.44    1.67
   4   2 -16  202.78    2.47
   6   2 -16  114.46    1.72
   8   2 -16  174.20    2.59
  10   2 -16   77.18    1.19
  12   2 -16    0.67    0.14
  14   2 -16    1.71    0.16
  16   2 -16    0.27    0.26
 -15   3 -16    2.75    0.23
 -13   3 -16    6.73    0.25
 -11   3 -16    2.31    0.19
  -9   3 -16    4.81    0.15
  -7   3 -16    1.24    0.09
  -5   3 -16   16.05    0.24
  -3   3 -16    3.01    0.11
  -1   3 -16   10.65    0.18
   1   3 -16    9.09    0.16
   3   3 -16   58.99    0.75
   5   3 -16    6.28    0.19
   7   3 -16    1.68    0.13
   9   3 -16    1.17    0.13
  11   3 -16   10.19    0.26
  13   3 -16    1.07    0.15
  15   3 -16    5.40    0.25
 -14   4 -16   56.42    0.91
 -12   4 -16   46.69    0.76
 -10   4 -16   45.51    0.59
  -8   4 -16   15.93    0.25
  -6   4 -16    5.95    0.15
  -4   4 -16   10.00    0.18
  -2   4 -16   13.29    0.21
   0   4 -16   23.92    0.33
   2   4 -16  117.36    1.45
   4   4 -16   66.51    0.83
   6   4 -16   88.00    1.35
   8   4 -16   54.82    0.85
  10   4 -16  105.64    1.63
  12   4 -16    6.76    0.24
  14   4 -16    4.00    0.24
  16   4 -16    0.17    0.22
 -15   5 -16    5.39    0.36
 -13   5 -16    3.12    0.22
 -11   5 -16    0.34    0.11
  -9   5 -16    4.46    0.15
  -7   5 -16    2.03    0.13
  -5   5 -16    7.23    0.16
  -3   5 -16   10.12    0.18
  -1   5 -16    4.07    0.12
   1   5 -16   20.31    0.29
   3   5 -16   43.71    0.56
   5   5 -16    0.27    0.11
   7   5 -16   15.46    0.32
   9   5 -16    1.07    0.14
  11   5 -16    9.53    0.26
  13   5 -16    0.06    0.15
  15   5 -16    7.30    0.28
 -14   6 -16   40.09    0.68
 -12   6 -16   26.88    0.40
 -10   6 -16   39.70    0.56
  -8   6 -16   10.16    0.20
  -6   6 -16   21.02    0.31
  -4   6 -16   35.31    0.47
  -2   6 -16   28.53    0.39
   0   6 -16   31.15    0.42
   2   6 -16   53.97    0.69
   4   6 -16   53.97    0.86
   6   6 -16  113.53    1.74
   8   6 -16   47.54    0.77
  10   6 -16   50.44    0.82
  12   6 -16    5.31    0.23
  14   6 -16    0.04    0.13
 -13   7 -16   16.50    0.36
 -11   7 -16   27.50    0.40
  -9   7 -16   20.31    0.31
  -7   7 -16    8.53    0.18
  -5   7 -16    3.82    0.14
  -3   7 -16    5.26    0.14
  -1   7 -16   43.51    0.56
   1   7 -16   57.82    0.73
   3   7 -16   37.52    0.62
   5   7 -16   15.52    0.26
   7   7 -16   30.57    0.43
   9   7 -16   14.25    0.25
  11   7 -16   28.73    0.43
  13   7 -16    1.70    0.14
  15   7 -16    8.01    0.41
 -12   8 -16   17.76    0.38
 -10   8 -16   38.38    0.64
  -8   8 -16   18.08    0.36
  -6   8 -16   13.58    0.24
  -4   8 -16   11.20    0.21
  -2   8 -16    0.44    0.11
   0   8 -16   29.35    0.51
   2   8 -16   86.58    1.34
   4   8 -16   42.96    0.70
   6   8 -16   14.35    0.31
   8   8 -16   17.40    0.29
  10   8 -16   13.14    0.25
  12   8 -16   14.90    0.28
  14   8 -16    4.51    0.21
 -13   9 -16   26.82    0.50
 -11   9 -16    7.66    0.26
  -9   9 -16    3.95    0.21
  -7   9 -16    1.54    0.14
  -5   9 -16    0.05    0.12
  -3   9 -16    0.25    0.12
  -1   9 -16   16.66    0.33
   1   9 -16   50.30    0.80
   3   9 -16   27.86    0.49
   5   9 -16   26.51    0.47
   7   9 -16   55.59    0.91
   9   9 -16   23.08    0.36
  11   9 -16    3.45    0.19
  13   9 -16    4.06    0.20
 -12  10 -16   20.35    0.41
 -10  10 -16   58.26    0.93
  -8  10 -16    3.07    0.20
  -6  10 -16    8.60    0.24
  -4  10 -16    1.21    0.13
  -2  10 -16    8.02    0.23
   0  10 -16   30.15    0.52
   2  10 -16   36.71    0.61
   4  10 -16   41.61    0.70
   6  10 -16   35.55    0.61
   8  10 -16   30.75    0.56
  10  10 -16   26.07    0.40
  12  10 -16    0.26    0.13
 -11  11 -16    1.76    0.17
  -9  11 -16    1.41    0.15
  -7  11 -16    1.98    0.17
  -5  11 -16    0.77    0.14
  -3  11 -16    1.92    0.16
  -1  11 -16    0.28    0.13
   1  11 -16   50.83    0.82
   3  11 -16   42.68    0.71
   5  11 -16   32.53    0.58
   7  11 -16   23.18    0.45
   9  11 -16   14.82    0.35
  11  11 -16   12.21    0.28
 -10  12 -16    3.03    0.23
  -8  12 -16    1.62    0.16
  -6  12 -16    0.30    0.14
  -4  12 -16    0.81    0.14
  -2  12 -16    2.96    0.20
   0  12 -16    3.31    0.21
   2  12 -16    4.19    0.22
   4  12 -16   20.29    0.41
   6  12 -16    2.97    0.22
   8  12 -16   19.82    0.42
  10  12 -16    6.48    0.27
  -9  13 -16    4.25    0.24
  -7  13 -16    5.64    0.24
  -5  13 -16    3.31    0.22
  -3  13 -16    2.52    0.20
  -1  13 -16   10.34    0.28
   1  13 -16   15.64    0.35
   3  13 -16   24.64    0.47
   5  13 -16    8.07    0.27
   7  13 -16   17.17    0.39
   9  13 -16    8.81    0.29
  -8  14 -16    5.34    0.25
  -6  14 -16    2.64    0.20
  -4  14 -16    0.05    0.14
  -2  14 -16    0.40    0.14
   0  14 -16    3.27    0.22
   2  14 -16    3.35    0.23
   4  14 -16    9.77    0.29
   6  14 -16    1.33    0.17
   8  14 -16    4.07    0.26
  -7  15 -16    0.31    0.21
  -5  15 -16    4.95    0.24
  -3  15 -16    1.58    0.16
  -1  15 -16    5.78    0.25
   1  15 -16   21.80    0.44
   3  15 -16   31.69    0.58
   5  15 -16   18.03    0.40
   7  15 -16   14.23    0.36
  -4  16 -16   -0.03    0.15
  -2  16 -16    0.61    0.16
   0  16 -16    1.32    0.17
   2  16 -16    0.37    0.16
   4  16 -16    4.93    0.27
  -1 -17 -15    1.17    0.28
   1 -17 -15    0.07    0.25
   3 -17 -15    0.16    0.26
  -4 -16 -15    0.27    0.26
  -2 -16 -15    5.77    0.39
   0 -16 -15    0.35    0.25
   2 -16 -15    6.34    0.38
   4 -16 -15    8.07    0.40
   6 -16 -15   12.61    0.48
  -7 -15 -15    4.07    0.37
  -5 -15 -15    0.09    0.24
  -3 -15 -15    0.22    0.24
  -1 -15 -15    0.23    0.24
   1 -15 -15   15.09    0.50
   3 -15 -15   31.64    0.80
   5 -15 -15    1.41    0.25
   7 -15 -15    1.70    0.26
  -8 -14 -15   23.63    0.64
  -6 -14 -15    1.76    0.25
  -4 -14 -15    1.47    0.25
  -2 -14 -15    6.37    0.35
   0 -14 -15    5.33    0.34
   2 -14 -15   21.29    0.59
   4 -14 -15    5.82    0.34
   6 -14 -15   15.80    0.50
   8 -14 -15   11.02    0.30
  10 -14 -15   16.27    0.50
  -9 -13 -15    3.13    0.33
  -7 -13 -15   10.43    0.42
  -5 -13 -15    3.90    0.32
  -3 -13 -15    2.83    0.30
  -1 -13 -15    3.90    0.31
   1 -13 -15    5.20    0.32
   3 -13 -15   49.09    1.13
   5 -13 -15   12.68    0.42
   7 -13 -15   16.55    0.35
   9 -13 -15    9.94    0.28
  11 -13 -15    3.04    0.24
 -10 -12 -15    2.73    0.27
  -8 -12 -15   27.66    0.72
  -6 -12 -15    9.92    0.39
  -4 -12 -15   -0.01    0.20
  -2 -12 -15    1.40    0.21
   0 -12 -15    2.45    0.23
   2 -12 -15   36.67    0.85
   4 -12 -15   30.35    0.50
   6 -12 -15   16.88    0.34
   8 -12 -15   22.09    0.40
  10 -12 -15   29.96    0.52
  12 -12 -15    2.00    0.19
 -11 -11 -15   24.12    0.65
  -9 -11 -15   16.86    0.51
  -7 -11 -15   11.15    0.41
  -5 -11 -15    8.69    0.23
  -3 -11 -15    0.25    0.11
  -1 -11 -15    5.03    0.18
   1 -11 -15    3.13    0.26
   3 -11 -15   26.22    0.44
   5 -11 -15   39.38    0.62
   7 -11 -15   40.65    0.64
   9 -11 -15   33.67    0.56
  11 -11 -15    4.74    0.24
 -12 -10 -15    6.58    0.37
 -10 -10 -15    2.80    0.31
  -8 -10 -15   33.02    0.56
  -6 -10 -15    1.15    0.13
  -4 -10 -15    1.79    0.14
  -2 -10 -15    5.56    0.18
   0 -10 -15    4.39    0.16
   2 -10 -15   35.78    0.81
   4 -10 -15    8.24    0.22
   6 -10 -15   17.08    0.33
   8 -10 -15   24.67    0.43
  10 -10 -15    9.83    0.27
  12 -10 -15   12.96    0.49
 -13  -9 -15   48.08    1.10
 -11  -9 -15   20.23    0.57
  -9  -9 -15   43.92    0.73
  -7  -9 -15   26.78    0.47
  -5  -9 -15   21.18    0.38
  -3  -9 -15    1.03    0.11
  -1  -9 -15    4.23    0.16
   1  -9 -15   45.92    0.73
   3  -9 -15   20.07    0.35
   5  -9 -15   73.05    1.09
   7  -9 -15   43.62    0.68
   9  -9 -15   32.89    0.54
  11  -9 -15   10.05    0.44
  13  -9 -15   24.56    0.70
 -14  -8 -15    2.51    0.27
 -12  -8 -15   14.38    0.33
 -10  -8 -15    9.10    0.26
  -8  -8 -15   48.22    0.79
  -6  -8 -15   29.09    0.49
  -4  -8 -15   45.70    0.72
  -2  -8 -15    2.11    0.14
   0  -8 -15    7.63    0.19
   2  -8 -15    2.88    0.11
   4  -8 -15   24.12    0.40
   6  -8 -15   17.47    0.32
   8  -8 -15   14.58    0.30
  10  -8 -15    3.03    0.19
  12  -8 -15   24.91    0.68
  14  -8 -15    6.30    0.43
 -13  -7 -15   69.62    1.10
 -11  -7 -15   33.53    0.58
  -9  -7 -15   18.73    0.36
  -7  -7 -15   35.91    0.59
  -5  -7 -15    7.83    0.21
  -3  -7 -15   21.46    0.37
  -1  -7 -15    6.84    0.18
   1  -7 -15   24.82    0.33
   3  -7 -15   23.94    0.32
   5  -7 -15  120.53    1.75
   7  -7 -15   44.03    0.68
   9  -7 -15   65.01    0.99
  11  -7 -15   15.22    0.49
  15  -7 -15    0.01    0.28
 -14  -6 -15    4.18    0.24
 -12  -6 -15    8.07    0.25
 -10  -6 -15    1.92    0.15
  -8  -6 -15   23.86    0.42
  -6  -6 -15   50.69    0.80
  -4  -6 -15    0.19    0.10
  -2  -6 -15    8.38    0.20
   0  -6 -15    3.88    0.11
   2  -6 -15   11.66    0.18
   4  -6 -15   17.87    0.25
   6  -6 -15   12.45    0.25
   8  -6 -15    9.33    0.22
  10  -6 -15    1.59    0.22
  12  -6 -15    8.25    0.40
  14  -6 -15    6.77    0.41
 -15  -5 -15   43.72    0.73
 -13  -5 -15   47.53    0.77
 -11  -5 -15   60.83    0.95
  -9  -5 -15   42.50    0.69
  -7  -5 -15   79.46    1.21
  -5  -5 -15    0.24    0.10
  -3  -5 -15    1.14    0.11
  -1  -5 -15    0.93    0.07
   1  -5 -15   16.76    0.23
   3  -5 -15   26.75    0.35
   5  -5 -15   49.06    0.61
   7  -5 -15   72.20    1.08
   9  -5 -15   73.95    1.12
  11  -5 -15   46.04    1.08
  13  -5 -15   18.72    0.56
  15  -5 -15    5.12    0.40
 -14  -4 -15    1.33    0.16
 -12  -4 -15    7.04    0.24
 -10  -4 -15    6.50    0.22
  -8  -4 -15    6.24    0.20
  -6  -4 -15    6.05    0.19
  -4  -4 -15    0.87    0.10
  -2  -4 -15    5.84    0.12
   0  -4 -15    0.49    0.06
   2  -4 -15    0.39    0.06
   4  -4 -15   11.13    0.18
   6  -4 -15    9.15    0.16
   8  -4 -15   15.34    0.23
  10  -4 -15    1.84    0.21
  12  -4 -15    5.41    0.34
  14  -4 -15    5.13    0.38
  16  -4 -15    0.59    0.28
 -15  -3 -15   79.49    1.23
 -13  -3 -15   49.91    0.80
 -11  -3 -15   52.59    0.84
  -9  -3 -15   33.00    0.56
  -7  -3 -15  100.45    1.52
  -5  -3 -15    2.27    0.14
  -3  -3 -15   17.70    0.24
  -1  -3 -15   26.10    0.34
   1  -3 -15   13.43    0.20
   3  -3 -15  159.49    1.98
   5  -3 -15   76.36    0.93
   7  -3 -15  103.24    1.26
   9  -3 -15   70.67    1.10
  15  -3 -15    1.50    0.27
 -16  -2 -15    0.09    0.16
 -14  -2 -15    0.21    0.15
 -12  -2 -15    0.42    0.13
 -10  -2 -15    2.02    0.18
  -8  -2 -15    0.10    0.11
  -6  -2 -15    9.34    0.22
  -4  -2 -15    7.35    0.14
  -2  -2 -15   13.29    0.20
   0  -2 -15    6.49    0.13
   2  -2 -15    2.26    0.10
   4  -2 -15   20.83    0.28
   6  -2 -15    2.91    0.10
   8  -2 -15    0.09    0.10
  10  -2 -15    0.07    0.11
  12  -2 -15    0.64    0.21
  14  -2 -15    1.37    0.25
  16  -2 -15   -0.17    0.27
 -15  -1 -15   57.65    0.92
 -13  -1 -15   79.65    1.22
 -11  -1 -15  144.93    2.18
  -9  -1 -15   34.16    0.57
  -7  -1 -15   69.33    1.07
  -5  -1 -15    5.74    0.13
  -3  -1 -15   16.67    0.24
  -1  -1 -15    0.32    0.06
   1  -1 -15    8.47    0.15
   3  -1 -15  103.83    1.26
   5  -1 -15   75.34    0.92
   7  -1 -15  151.44    1.83
   9  -1 -15  162.83    2.44
  11  -1 -15   21.42    0.39
  13  -1 -15   45.22    1.07
  15  -1 -15    7.39    0.39
 -16   0 -15   -0.08    0.16
 -14   0 -15    0.09    0.14
 -12   0 -15    0.28    0.13
 -10   0 -15    0.13    0.11
  -8   0 -15    0.07    0.10
  -6   0 -15   -0.01    0.07
  -4   0 -15    0.08    0.06
  -2   0 -15    0.14    0.06
   0   0 -15    0.51    0.07
   2   0 -15    0.04    0.06
   4   0 -15    0.05    0.06
   6   0 -15   -0.03    0.06
   8   0 -15    0.20    0.10
  10   0 -15    0.05    0.11
  12   0 -15   -0.02    0.12
  14   0 -15   -0.04    0.22
  16   0 -15   -0.14    0.25
 -15   1 -15   56.49    0.92
 -13   1 -15   78.02    1.22
 -11   1 -15  145.71    2.18
  -9   1 -15   35.33    0.57
  -7   1 -15   69.78    0.87
  -5   1 -15    5.59    0.13
  -3   1 -15   16.79    0.24
  -1   1 -15    0.35    0.06
   1   1 -15    8.39    0.15
   3   1 -15  103.50    1.26
   5   1 -15   74.34    0.92
   7   1 -15  150.45    2.27
   9   1 -15  164.19    2.44
  11   1 -15   21.82    0.40
  13   1 -15   46.15    0.75
  15   1 -15    6.94    0.39
 -16   2 -15    0.29    0.16
 -14   2 -15    0.23    0.14
 -12   2 -15    0.39    0.13
 -10   2 -15    2.26    0.17
  -8   2 -15    0.26    0.08
  -6   2 -15    9.34    0.17
  -4   2 -15    7.09    0.14
  -2   2 -15   12.89    0.20
   0   2 -15    6.40    0.13
   2   2 -15    2.20    0.09
   4   2 -15   20.58    0.28
   6   2 -15    2.87    0.15
   8   2 -15   -0.02    0.10
  10   2 -15   -0.10    0.11
  12   2 -15    1.16    0.14
  14   2 -15    2.57    0.21
  16   2 -15    0.07    0.16
 -15   3 -15   78.22    1.23
 -13   3 -15   49.32    0.80
 -11   3 -15   52.78    0.84
  -9   3 -15   33.92    0.46
  -7   3 -15  101.56    1.24
  -5   3 -15    2.23    0.11
  -3   3 -15   17.09    0.27
  -1   3 -15   25.74    0.35
   1   3 -15   13.02    0.20
   3   3 -15  158.00    1.91
   5   3 -15   75.75    0.94
   7   3 -15  102.96    1.57
   9   3 -15   73.13    1.11
  11   3 -15   37.20    0.61
  13   3 -15   35.56    0.61
  15   3 -15    2.32    0.19
 -14   4 -15    1.55    0.16
 -12   4 -15    7.19    0.23
 -10   4 -15    6.73    0.17
  -8   4 -15    6.41    0.16
  -6   4 -15    5.96    0.14
  -4   4 -15    0.88    0.08
  -2   4 -15    5.63    0.13
   0   4 -15    0.42    0.07
   2   4 -15    0.27    0.07
   4   4 -15   10.95    0.18
   6   4 -15    8.98    0.22
   8   4 -15   15.44    0.31
  10   4 -15    2.37    0.16
  12   4 -15    5.52    0.23
  14   4 -15    5.70    0.24
  16   4 -15    0.55    0.17
 -15   5 -15   43.09    0.72
 -13   5 -15   45.99    0.76
 -11   5 -15   60.58    0.77
  -9   5 -15   43.19    0.56
  -7   5 -15   79.49    0.99
  -5   5 -15    0.39    0.08
  -3   5 -15    1.07    0.08
  -1   5 -15    0.84    0.07
   1   5 -15   15.89    0.24
   3   5 -15   25.50    0.35
   5   5 -15   48.10    0.77
   7   5 -15   72.12    1.11
   9   5 -15   75.47    1.16
  11   5 -15   47.67    0.77
  13   5 -15   19.12    0.39
  15   5 -15    5.05    0.21
 -14   6 -15    4.28    0.34
 -12   6 -15    8.16    0.20
 -10   6 -15    2.36    0.14
  -8   6 -15   23.23    0.34
  -6   6 -15   50.69    0.65
  -4   6 -15    0.27    0.08
  -2   6 -15    8.31    0.16
   0   6 -15    3.69    0.12
   2   6 -15   11.48    0.19
   4   6 -15   17.80    0.34
   6   6 -15   12.27    0.27
   8   6 -15    9.85    0.25
  10   6 -15    1.35    0.14
  12   6 -15    8.67    0.21
  14   6 -15    6.28    0.21
  16   6 -15   -0.13    0.22
 -13   7 -15   71.19    1.11
 -11   7 -15   33.81    0.46
  -9   7 -15   18.69    0.29
  -7   7 -15   36.26    0.48
  -5   7 -15    8.31    0.17
  -3   7 -15   21.21    0.30
  -1   7 -15    6.66    0.15
   1   7 -15   24.35    0.33
   3   7 -15   23.36    0.42
   5   7 -15  118.89    1.50
   7   7 -15   43.82    0.59
   9   7 -15   65.22    0.85
  11   7 -15   15.85    0.28
  13   7 -15   40.98    0.58
  15   7 -15    0.09    0.14
 -14   8 -15    2.69    0.20
 -12   8 -15   14.66    0.33
 -10   8 -15    9.42    0.26
  -8   8 -15   49.78    0.79
  -6   8 -15   28.66    0.49
  -4   8 -15   45.56    0.73
  -2   8 -15    2.21    0.16
   0   8 -15    7.63    0.21
   2   8 -15    2.80    0.16
   4   8 -15   23.43    0.42
   6   8 -15   17.36    0.28
   8   8 -15   14.72    0.26
  10   8 -15    2.95    0.16
  12   8 -15   25.23    0.40
  14   8 -15    6.22    0.22
 -13   9 -15   48.66    0.79
 -11   9 -15   21.08    0.41
  -9   9 -15   45.20    0.73
  -7   9 -15   26.99    0.47
  -5   9 -15   21.00    0.39
  -3   9 -15    0.78    0.12
  -1   9 -15    3.87    0.18
   1   9 -15   46.24    0.75
   3   9 -15   18.93    0.37
   5   9 -15   71.42    1.13
   7   9 -15   43.22    0.59
   9   9 -15   31.79    0.46
  11   9 -15    9.73    0.23
  13   9 -15   23.90    0.39
 -12  10 -15    7.23    0.26
 -10  10 -15    2.98    0.21
  -8  10 -15   33.28    0.57
  -6  10 -15    1.32    0.13
  -4  10 -15    1.82    0.15
  -2  10 -15    5.05    0.20
   0  10 -15    4.41    0.19
   2  10 -15   33.32    0.58
   4  10 -15    8.19    0.24
   6  10 -15   16.58    0.35
   8  10 -15   24.40    0.37
  10  10 -15    9.62    0.23
  12  10 -15   12.64    0.27
  14  10 -15    1.38    0.27
 -11  11 -15   24.83    0.47
  -9  11 -15   17.73    0.36
  -7  11 -15   11.40    0.28
  -5  11 -15    8.19    0.24
  -3  11 -15    0.14    0.12
  -1  11 -15    4.86    0.20
   1  11 -15    2.76    0.18
   3  11 -15   25.13    0.46
   5  11 -15   38.36    0.65
   7  11 -15   38.05    0.66
   9  11 -15   33.18    0.48
  11  11 -15    4.68    0.20
  13  11 -15    1.12    0.15
 -10  12 -15    2.73    0.22
  -8  12 -15   28.45    0.51
  -6  12 -15   10.06    0.27
  -4  12 -15    0.06    0.13
  -2  12 -15    1.45    0.14
   0  12 -15    2.36    0.19
   2  12 -15   36.79    0.62
   4  12 -15   29.00    0.53
   6  12 -15   16.26    0.35
   8  12 -15   20.33    0.42
  10  12 -15   28.92    0.54
  12  12 -15    1.93    0.15
  -9  13 -15    3.48    0.22
  -7  13 -15   10.18    0.28
  -5  13 -15    4.30    0.22
  -3  13 -15    2.94    0.20
  -1  13 -15    3.74    0.21
   1  13 -15    5.24    0.22
   3  13 -15   50.47    0.83
   5  13 -15   12.64    0.31
   7  13 -15   16.46    0.37
   9  13 -15    9.83    0.30
  11  13 -15    3.04    0.26
  -8  14 -15   22.65    0.45
  -6  14 -15    1.50    0.16
  -4  14 -15    1.83    0.15
  -2  14 -15    5.92    0.23
   0  14 -15    5.46    0.23
   2  14 -15   21.49    0.42
   4  14 -15    6.29    0.25
   6  14 -15   16.31    0.37
   8  14 -15   11.40    0.32
  10  14 -15   16.11    0.39
  -7  15 -15    4.18    0.34
  -5  15 -15    0.34    0.15
  -3  15 -15    0.40    0.15
  -1  15 -15    0.35    0.15
   1  15 -15   15.54    0.35
   3  15 -15   32.73    0.58
   5  15 -15    1.42    0.17
   7  15 -15    1.61    0.18
  -6  16 -15   13.37    0.48
  -4  16 -15    0.43    0.16
  -2  16 -15    5.76    0.25
   0  16 -15    0.27    0.15
   2  16 -15    6.13    0.26
   4  16 -15    8.13    0.29
   6  16 -15   13.75    0.35
  -3  17 -15    0.17    0.16
  -1  17 -15    1.55    0.18
   1  17 -15   -0.02    0.16
   3  17 -15    0.25    0.17
  -3 -17 -14    0.51    0.27
  -1 -17 -14    2.85    0.36
   1 -17 -14    0.28    0.25
   3 -17 -14   -0.10    0.25
   5 -17 -14    3.17    0.35
  -6 -16 -14    0.29    0.26
  -4 -16 -14    1.17    0.26
  -2 -16 -14    0.09    0.24
   0 -16 -14    1.49    0.25
   2 -16 -14    8.80    0.42
   4 -16 -14   13.34    0.48
   6 -16 -14    0.58    0.24
  -7 -15 -14   13.23    0.47
  -5 -15 -14    7.52    0.39
  -3 -15 -14    0.31    0.24
  -1 -15 -14   -0.06    0.22
   1 -15 -14   16.24    0.51
   3 -15 -14    4.69    0.34
   5 -15 -14    1.31    0.24
   7 -15 -14   19.16    0.39
   9 -15 -14   19.98    0.40
 -10 -14 -14    2.83    0.28
  -8 -14 -14    6.76    0.38
  -6 -14 -14    6.59    0.36
  -4 -14 -14    6.98    0.36
  -2 -14 -14    0.32    0.22
   0 -14 -14    1.60    0.23
   2 -14 -14   26.47    0.69
   4 -14 -14   19.15    0.54
   6 -14 -14    5.55    0.23
   8 -14 -14   17.40    0.36
  10 -14 -14    6.07    0.26
 -11 -13 -14   18.30    0.54
  -9 -13 -14   42.25    0.99
  -7 -13 -14   25.16    0.66
  -5 -13 -14   17.71    0.52
  -3 -13 -14    2.27    0.29
  -1 -13 -14    0.58    0.20
   1 -13 -14    0.74    0.20
   3 -13 -14    8.53    0.36
   5 -13 -14    8.72    0.24
   7 -13 -14   24.78    0.45
   9 -13 -14   35.57    0.59
  11 -13 -14   25.30    0.47
 -12 -12 -14   19.52    0.56
 -10 -12 -14   11.05    0.42
  -8 -12 -14   10.08    0.40
  -6 -12 -14   19.38    0.54
  -4 -12 -14   20.71    0.56
  -2 -12 -14    0.35    0.19
   0 -12 -14    0.57    0.19
   2 -12 -14    1.45    0.20
   4 -12 -14   33.15    0.54
   6 -12 -14   16.41    0.33
   8 -12 -14   27.75    0.48
  10 -12 -14   14.29    0.32
  12 -12 -14   20.19    0.41
 -13 -11 -14   24.80    0.66
 -11 -11 -14    4.94    0.34
  -9 -11 -14   77.44    1.69
  -7 -11 -14   12.80    0.43
  -5 -11 -14   28.55    0.49
  -3 -11 -14    0.36    0.11
  -1 -11 -14   13.50    0.27
   1 -11 -14   35.37    0.81
   3 -11 -14    1.99    0.13
   5 -11 -14    1.73    0.13
   7 -11 -14   20.77    0.37
   9 -11 -14   20.40    0.39
  11 -11 -14   28.72    0.50
 -12 -10 -14   11.10    0.43
 -10 -10 -14   18.55    0.53
  -8 -10 -14   43.58    0.70
  -6 -10 -14   21.83    0.39
  -4 -10 -14    0.37    0.10
  -2 -10 -14    9.72    0.22
   0 -10 -14    1.84    0.12
   2 -10 -14   24.64    0.42
   4 -10 -14    7.84    0.21
   6 -10 -14   37.83    0.60
   8 -10 -14   59.97    0.92
  10 -10 -14   26.09    0.46
  12 -10 -14    7.79    0.42
  14 -10 -14    5.69    0.43
 -13  -9 -14   15.23    0.49
 -11  -9 -14    0.42    0.21
  -9  -9 -14   60.85    0.97
  -7  -9 -14   34.99    0.57
  -5  -9 -14   43.94    0.70
  -3  -9 -14    7.72    0.20
  -1  -9 -14   11.14    0.23
   1  -9 -14   12.58    0.20
   3  -9 -14    0.35    0.10
   5  -9 -14    7.67    0.20
   7  -9 -14    9.41    0.23
   9  -9 -14   13.32    0.29
  11  -9 -14   36.24    0.60
  13  -9 -14   15.68    0.53
 -14  -8 -14   24.19    0.64
 -12  -8 -14   52.43    1.15
 -10  -8 -14   31.67    0.55
  -8  -8 -14   27.87    0.48
  -6  -8 -14   40.06    0.65
  -4  -8 -14   59.58    0.92
  -2  -8 -14   48.86    0.76
   0  -8 -14    1.29    0.08
   2  -8 -14    0.47    0.07
   4  -8 -14   12.69    0.25
   6  -8 -14   54.43    0.83
   8  -8 -14   73.75    1.54
  10  -8 -14   47.57    0.73
  14  -8 -14   24.15    0.69
 -15  -7 -14    0.36    0.24
 -13  -7 -14   13.91    0.45
 -11  -7 -14    8.21    0.24
  -9  -7 -14    8.62    0.23
  -7  -7 -14   30.44    0.51
  -5  -7 -14   78.38    1.20
  -3  -7 -14   18.58    0.33
  -1  -7 -14   27.55    0.36
   1  -7 -14    1.18    0.08
   3  -7 -14    0.70    0.07
   5  -7 -14   13.93    0.26
   7  -7 -14    8.14    0.21
   9  -7 -14    0.77    0.12
  11  -7 -14    5.80    0.35
  13  -7 -14    3.58    0.36
 -14  -6 -14   37.23    0.64
 -12  -6 -14   87.35    1.33
 -10  -6 -14   87.70    1.35
  -8  -6 -14   47.91    0.75
  -6  -6 -14   15.51    0.30
  -4  -6 -14    2.43    0.14
  -2  -6 -14    4.49    0.10
   0  -6 -14    5.52    0.12
   2  -6 -14   11.47    0.18
   4  -6 -14   24.79    0.33
   6  -6 -14   94.77    1.40
   8  -6 -14  103.88    1.56
  10  -6 -14   80.72    1.20
  12  -6 -14   19.10    0.55
 -15  -5 -14    9.86    0.39
 -13  -5 -14    0.48    0.14
 -11  -5 -14   15.71    0.33
  -9  -5 -14   14.47    0.30
  -7  -5 -14   11.95    0.25
  -5  -5 -14   10.34    0.22
  -3  -5 -14   14.91    0.22
  -1  -5 -14    1.39    0.08
   1  -5 -14    1.81    0.09
   3  -5 -14    1.55    0.09
   5  -5 -14    0.24    0.06
   7  -5 -14   15.59    0.23
   9  -5 -14   52.70    0.81
  11  -5 -14    7.08    0.34
  13  -5 -14    4.56    0.35
  15  -5 -14    5.70    0.41
 -16  -4 -14   11.37    0.43
 -14  -4 -14   61.74    0.97
 -12  -4 -14   55.23    0.87
 -10  -4 -14   67.53    1.04
  -8  -4 -14  110.12    1.66
  -6  -4 -14   34.62    0.56
  -4  -4 -14   44.30    0.69
  -2  -4 -14  169.57    2.03
   0  -4 -14    0.54    0.06
   2  -4 -14   74.01    0.89
   4  -4 -14   10.46    0.16
   6  -4 -14   75.70    0.93
   8  -4 -14  131.39    1.59
  10  -4 -14   43.94    1.02
  12  -4 -14   43.68    1.02
  16  -4 -14   21.06    0.65
 -15  -3 -14    0.59    0.15
 -13  -3 -14    0.89    0.14
 -11  -3 -14   20.64    0.39
  -9  -3 -14    2.20    0.16
  -7  -3 -14    1.87    0.14
  -5  -3 -14    1.22    0.07
  -3  -3 -14    1.52    0.08
  -1  -3 -14    1.47    0.08
   1  -3 -14    2.27    0.09
   3  -3 -14    1.64    0.09
   5  -3 -14    0.64    0.07
   7  -3 -14    0.73    0.07
   9  -3 -14   50.71    0.89
  11  -3 -14   -0.07    0.19
  13  -3 -14    4.54    0.33
  15  -3 -14   -0.07    0.25
 -16  -2 -14   26.38    0.49
 -14  -2 -14   46.61    0.76
 -12  -2 -14   96.65    1.47
 -10  -2 -14  100.34    1.52
  -8  -2 -14  108.93    1.65
  -6  -2 -14  108.38    1.31
  -4  -2 -14   73.58    0.90
  -2  -2 -14   11.13    0.17
   0  -2 -14    0.14    0.05
   2  -2 -14   18.30    0.25
   4  -2 -14   62.71    0.76
   6  -2 -14   53.88    0.67
   8  -2 -14  112.29    1.36
  10  -2 -14   45.20    0.72
 -15  -1 -14    0.96    0.15
 -13  -1 -14    0.73    0.14
 -11  -1 -14    0.44    0.12
  -9  -1 -14    2.50    0.16
  -7  -1 -14    1.85    0.10
  -5  -1 -14    2.23    0.09
  -3  -1 -14    2.86    0.09
  -1  -1 -14    6.95    0.13
   1  -1 -14    4.40    0.10
   3  -1 -14   14.20    0.20
   5  -1 -14    6.57    0.13
   7  -1 -14   32.47    0.42
   9  -1 -14   10.78    0.24
  11  -1 -14    2.25    0.16
  13  -1 -14    0.85    0.22
  15  -1 -14    0.15    0.24
  17  -1 -14    0.58    0.28
 -16   0 -14    2.75    0.23
 -14   0 -14   55.78    0.89
 -12   0 -14   80.35    1.23
 -10   0 -14  162.18    2.42
  -8   0 -14  113.85    1.39
  -6   0 -14  125.75    1.51
  -4   0 -14   34.82    0.45
  -2   0 -14   37.87    0.48
   0   0 -14   95.32    1.16
   2   0 -14   14.12    0.20
   4   0 -14   29.09    0.38
   6   0 -14   26.16    0.34
   8   0 -14   52.21    0.82
  10   0 -14   75.04    1.15
  12   0 -14   73.13    1.15
  14   0 -14   45.28    0.74
  16   0 -14   55.99    1.31
 -15   1 -14    0.86    0.15
 -13   1 -14    0.73    0.13
 -11   1 -14    0.60    0.12
  -9   1 -14    2.56    0.12
  -7   1 -14    1.95    0.10
  -5   1 -14    2.41    0.12
  -3   1 -14    2.78    0.10
  -1   1 -14    6.73    0.13
   1   1 -14    4.30    0.10
   3   1 -14   13.97    0.20
   5   1 -14    6.86    0.13
   7   1 -14   32.91    0.53
   9   1 -14   11.02    0.24
  11   1 -14    2.20    0.17
  13   1 -14    1.23    0.14
  15   1 -14    0.27    0.14
  17   1 -14    0.33    0.26
 -16   2 -14   25.90    0.48
 -14   2 -14   46.44    0.76
 -12   2 -14   96.05    1.47
 -10   2 -14  100.99    1.24
  -8   2 -14  111.31    1.35
  -6   2 -14  106.76    1.31
  -4   2 -14   73.22    1.09
  -2   2 -14   11.31    0.21
   0   2 -14    0.15    0.05
   2   2 -14   17.81    0.25
   4   2 -14   60.84    0.76
   6   2 -14   54.00    0.84
   8   2 -14  111.47    1.70
  10   2 -14   46.17    0.73
  12   2 -14   35.99    0.59
  14   2 -14   26.16    0.47
  16   2 -14   15.56    0.35
 -15   3 -14    0.67    0.15
 -13   3 -14    1.00    0.14
 -11   3 -14   21.24    0.31
  -9   3 -14    2.36    0.12
  -7   3 -14    1.58    0.11
  -5   3 -14    1.22    0.08
  -3   3 -14    1.78    0.11
  -1   3 -14    1.32    0.10
   1   3 -14    2.39    0.09
   3   3 -14    1.43    0.08
   5   3 -14    0.64    0.06
   7   3 -14    0.63    0.10
   9   3 -14   52.57    0.82
  11   3 -14    0.28    0.12
  13   3 -14    4.88    0.21
  15   3 -14    0.02    0.14
  17   3 -14    0.16    0.16
 -16   4 -14   11.59    0.30
 -14   4 -14   60.24    0.96
 -12   4 -14   55.35    0.71
 -10   4 -14   67.89    0.85
  -8   4 -14  111.07    1.35
  -6   4 -14   35.12    0.46
  -4   4 -14   44.66    0.57
  -2   4 -14  168.72    2.46
   0   4 -14    0.60    0.07
   2   4 -14   71.48    0.89
   4   4 -14    9.85    0.16
   6   4 -14   75.08    1.16
   8   4 -14  130.46    1.98
  10   4 -14   45.83    0.73
  12   4 -14   44.38    0.72
  14   4 -14   50.52    0.84
  16   4 -14   21.55    0.61
 -15   5 -14    9.81    0.28
 -13   5 -14    0.43    0.11
 -11   5 -14   16.22    0.28
  -9   5 -14   14.85    0.24
  -7   5 -14   11.67    0.20
  -5   5 -14   10.60    0.18
  -3   5 -14   14.93    0.22
  -1   5 -14    1.45    0.11
   1   5 -14    1.70    0.11
   3   5 -14    1.37    0.08
   5   5 -14    0.03    0.09
   7   5 -14   15.20    0.31
   9   5 -14   52.44    0.84
  11   5 -14    7.28    0.23
  13   5 -14    3.96    0.21
  15   5 -14    6.41    0.21
 -14   6 -14   39.26    0.64
 -12   6 -14   86.94    1.15
 -10   6 -14   88.61    1.12
  -8   6 -14   46.84    0.61
  -6   6 -14   15.71    0.24
  -4   6 -14    2.48    0.11
  -2   6 -14    4.44    0.12
   0   6 -14    5.59    0.13
   2   6 -14   11.07    0.17
   4   6 -14   24.28    0.43
   6   6 -14   93.62    1.44
   8   6 -14  105.76    1.61
  10   6 -14   79.96    1.24
  12   6 -14   18.69    0.31
  14   6 -14   22.15    0.36
  16   6 -14   13.41    0.28
 -15   7 -14    0.36    0.15
 -13   7 -14   14.51    0.32
 -11   7 -14    8.52    0.24
  -9   7 -14    8.66    0.18
  -7   7 -14   30.75    0.41
  -5   7 -14   79.39    0.98
  -3   7 -14   18.97    0.27
  -1   7 -14   27.42    0.37
   1   7 -14    1.18    0.10
   3   7 -14    0.58    0.07
   5   7 -14   13.57    0.22
   7   7 -14    8.32    0.18
   9   7 -14    0.66    0.10
  11   7 -14    5.72    0.18
  13   7 -14    3.26    0.18
  15   7 -14    4.88    0.21
 -14   8 -14   24.73    0.46
 -12   8 -14   52.46    0.84
 -10   8 -14   32.66    0.55
  -8   8 -14   28.33    0.49
  -6   8 -14   40.78    0.66
  -4   8 -14   59.98    0.94
  -2   8 -14   48.80    0.78
   0   8 -14    1.10    0.11
   2   8 -14    0.34    0.10
   4   8 -14   12.63    0.21
   6   8 -14   54.43    0.71
   8   8 -14   74.25    0.95
  10   8 -14   46.71    0.63
  12   8 -14   38.01    0.55
  14   8 -14   23.87    0.38
 -13   9 -14   15.88    0.35
 -11   9 -14    0.47    0.13
  -9   9 -14   63.51    0.98
  -7   9 -14   34.67    0.58
  -5   9 -14   44.41    0.71
  -3   9 -14    7.98    0.21
  -1   9 -14   11.26    0.25
   1   9 -14   12.42    0.27
   3   9 -14    0.28    0.11
   5   9 -14    7.86    0.17
   7   9 -14    8.86    0.19
   9   9 -14   13.33    0.25
  11   9 -14   36.18    0.51
  13   9 -14   15.09    0.29
  15   9 -14    0.82    0.14
 -12  10 -14   11.16    0.29
 -10  10 -14   20.02    0.38
  -8  10 -14   43.94    0.71
  -6  10 -14   21.25    0.40
  -4  10 -14    0.25    0.11
  -2  10 -14    9.87    0.24
   0  10 -14    1.64    0.14
   2  10 -14   24.79    0.44
   4  10 -14    7.91    0.23
   6  10 -14   36.78    0.51
   8  10 -14   59.43    0.78
  10  10 -14   25.63    0.39
  12  10 -14    8.10    0.22
  14  10 -14    5.62    0.22
 -13  11 -14   25.13    0.68
 -11  11 -14    5.45    0.23
  -9  11 -14   80.76    1.23
  -7  11 -14   13.19    0.30
  -5  11 -14   28.61    0.50
  -3  11 -14    0.40    0.12
  -1  11 -14   13.52    0.29
   1  11 -14   35.01    0.59
   3  11 -14    1.69    0.13
   5  11 -14    1.39    0.14
   7  11 -14   19.33    0.39
   9  11 -14   19.95    0.34
  11  11 -14   28.79    0.43
  13  11 -14    5.32    0.21
 -12  12 -14   19.71    0.58
 -10  12 -14   12.00    0.30
  -8  12 -14    9.77    0.26
  -6  12 -14   19.95    0.38
  -4  12 -14   20.75    0.40
  -2  12 -14    0.30    0.12
   0  12 -14    0.91    0.13
   2  12 -14    1.46    0.14
   4  12 -14   32.48    0.56
   6  12 -14   15.77    0.34
   8  12 -14   26.63    0.50
  10  12 -14   14.03    0.27
  12  12 -14   19.91    0.35
 -11  13 -14   17.74    0.56
  -9  13 -14   43.21    0.71
  -7  13 -14   25.18    0.47
  -5  13 -14   18.10    0.36
  -3  13 -14    1.88    0.14
  -1  13 -14    0.84    0.13
   1  13 -14    0.71    0.13
   3  13 -14    8.93    0.26
   5  13 -14    8.23    0.26
   7  13 -14   25.15    0.47
   9  13 -14   33.86    0.61
  11  13 -14   25.94    0.41
 -10  14 -14    2.36    0.27
  -8  14 -14    6.82    0.37
  -6  14 -14    6.50    0.24
  -4  14 -14    6.70    0.24
  -2  14 -14    0.28    0.13
   0  14 -14    1.83    0.15
   2  14 -14   27.69    0.50
   4  14 -14   18.97    0.39
   6  14 -14    5.38    0.24
   8  14 -14   16.88    0.38
  10  14 -14    6.58    0.27
  -9  15 -14   19.78    0.60
  -7  15 -14   12.70    0.46
  -5  15 -14    7.16    0.25
  -3  15 -14    0.44    0.14
  -1  15 -14    0.17    0.14
   1  15 -14   16.39    0.36
   3  15 -14    5.40    0.24
   5  15 -14    1.41    0.17
   7  15 -14   19.50    0.41
   9  15 -14   18.34    0.42
  -6  16 -14    0.30    0.22
  -4  16 -14    1.40    0.16
  -2  16 -14    0.20    0.15
   0  16 -14    1.51    0.16
   2  16 -14   10.03    0.29
   4  16 -14   12.75    0.33
   6  16 -14    0.76    0.17
   8  16 -14   18.28    0.61
  -5  17 -14   16.47    0.53
  -3  17 -14    0.46    0.16
  -1  17 -14    3.81    0.24
   1  17 -14    0.33    0.16
   3  17 -14    0.24    0.17
   5  17 -14    2.56    0.22
  -2 -18 -13   20.93    0.62
   0 -18 -13    4.46    0.39
   2 -18 -13    1.28    0.27
  -5 -17 -13   -0.05    0.26
  -3 -17 -13    3.44    0.37
  -1 -17 -13    0.26    0.24
   1 -17 -13    0.23    0.25
   3 -17 -13    0.03    0.24
   5 -17 -13   -0.03    0.25
  -8 -16 -13   25.56    0.69
  -6 -16 -13   21.32    0.61
  -4 -16 -13    6.98    0.39
  -2 -16 -13   13.67    0.47
   0 -16 -13    6.03    0.36
   2 -16 -13    0.49    0.24
   4 -16 -13    0.05    0.23
   6 -16 -13    0.47    0.24
   8 -16 -13   21.51    0.43
  -9 -15 -13   17.07    0.53
  -7 -15 -13   12.00    0.44
  -5 -15 -13   17.15    0.53
  -3 -15 -13    4.40    0.33
  -1 -15 -13    5.13    0.33
   1 -15 -13    0.24    0.22
   3 -15 -13   -0.07    0.22
   5 -15 -13    2.64    0.31
   7 -15 -13   19.08    0.38
   9 -15 -13   12.54    0.31
 -10 -14 -13   23.97    0.63
  -8 -14 -13   38.52    0.91
  -6 -14 -13   55.36    1.22
  -4 -14 -13   11.89    0.42
  -2 -14 -13    4.08    0.31
   0 -14 -13    1.79    0.22
   2 -14 -13    0.68    0.21
   4 -14 -13   15.58    0.47
   6 -14 -13   17.03    0.35
   8 -14 -13   29.74    0.52
  10 -14 -13   29.81    0.72
 -11 -13 -13   19.67    0.55
  -9 -13 -13    8.59    0.39
  -7 -13 -13   15.24    0.47
  -5 -13 -13   30.01    0.74
  -3 -13 -13   17.73    0.50
  -1 -13 -13    1.68    0.21
   1 -13 -13    7.21    0.33
   3 -13 -13    3.82    0.28
   5 -13 -13    0.54    0.13
   7 -13 -13    9.37    0.25
   9 -13 -13    2.90    0.21
  11 -13 -13   13.82    0.43
 -12 -12 -13    3.17    0.33
 -10 -12 -13   42.91    0.98
  -8 -12 -13   31.58    0.77
  -6 -12 -13   26.39    0.66
  -4 -12 -13   17.01    0.48
  -2 -12 -13   11.19    0.38
   0 -12 -13   -0.06    0.17
   2 -12 -13    0.65    0.18
   4 -12 -13    0.00    0.11
   6 -12 -13   23.68    0.41
   8 -12 -13   13.07    0.29
  10 -12 -13   15.86    0.33
  12 -12 -13   19.61    0.39
 -13 -11 -13   14.73    0.47
 -11 -11 -13   24.06    0.63
  -9 -11 -13   28.54    0.71
  -7 -11 -13   58.01    1.29
  -5 -11 -13   29.10    0.71
  -3 -11 -13    2.90    0.15
  -1 -11 -13   17.71    0.33
   1 -11 -13    4.85    0.26
   3 -11 -13    7.44    0.20
   5 -11 -13    1.96    0.15
   7 -11 -13    7.18    0.22
   9 -11 -13   22.87    0.41
  11 -11 -13   21.64    0.41
  13 -11 -13   25.09    0.70
 -14 -10 -13   20.23    0.58
 -12 -10 -13    1.31    0.22
 -10 -10 -13   27.29    0.69
  -8 -10 -13   74.75    1.58
  -6 -10 -13   40.35    0.65
  -4 -10 -13    5.70    0.18
  -2 -10 -13    0.46    0.09
   0 -10 -13   12.02    0.24
   2 -10 -13    2.83    0.15
   4 -10 -13    2.56    0.15
   6 -10 -13   20.41    0.36
   8 -10 -13    8.30    0.23
  10 -10 -13   22.33    0.41
  12 -10 -13   45.81    0.73
 -13  -9 -13   18.39    0.53
 -11  -9 -13    1.01    0.21
  -9  -9 -13   61.52    0.97
  -7  -9 -13   40.19    0.65
  -5  -9 -13   28.96    0.48
  -3  -9 -13   49.44    0.77
  -1  -9 -13   73.53    1.12
   1  -9 -13    0.43    0.07
   3  -9 -13    1.86    0.12
   5  -9 -13    2.19    0.15
   7  -9 -13   22.37    0.38
   9  -9 -13   43.66    0.68
  11  -9 -13   25.80    0.45
 -14  -8 -13    1.88    0.23
 -12  -8 -13    9.41    0.37
 -10  -8 -13    1.75    0.15
  -8  -8 -13   12.44    0.27
  -6  -8 -13   29.07    0.49
  -4  -8 -13    0.35    0.09
  -2  -8 -13    1.44    0.11
   0  -8 -13   23.98    0.32
   2  -8 -13    8.55    0.15
   4  -8 -13   19.66    0.34
   6  -8 -13    4.71    0.17
   8  -8 -13    2.26    0.16
  10  -8 -13   21.00    0.38
  12  -8 -13   19.77    0.58
 -15  -7 -13    8.16    0.39
 -13  -7 -13   57.78    1.25
 -11  -7 -13   34.56    0.58
  -9  -7 -13   71.75    1.11
  -7  -7 -13   48.14    0.76
  -5  -7 -13   44.67    0.70
  -3  -7 -13   88.44    1.33
  -1  -7 -13    9.87    0.16
   1  -7 -13    1.85    0.09
   3  -7 -13    0.25    0.06
   5  -7 -13   48.04    0.73
   7  -7 -13   34.19    0.54
   9  -7 -13   84.47    1.25
  11  -7 -13   50.13    0.77
  13  -7 -13   45.76    1.08
  15  -7 -13   10.20    0.47
 -16  -6 -13    5.06    0.34
 -14  -6 -13    8.60    0.37
 -12  -6 -13    1.77    0.16
 -10  -6 -13    8.84    0.23
  -8  -6 -13   19.87    0.36
  -6  -6 -13    2.35    0.14
  -4  -6 -13    0.42    0.09
  -2  -6 -13   18.10    0.25
   0  -6 -13    0.10    0.05
   2  -6 -13    0.41    0.06
   4  -6 -13    0.36    0.06
   6  -6 -13   12.26    0.19
   8  -6 -13   39.70    0.63
  10  -6 -13    4.94    0.17
  12  -6 -13   19.02    0.55
  14  -6 -13    1.29    0.26
  16  -6 -13    0.98    0.29
 -15  -5 -13   28.30    0.70
 -13  -5 -13   59.55    0.94
 -11  -5 -13   38.70    0.63
  -9  -5 -13  109.52    1.66
  -7  -5 -13  109.80    1.64
  -5  -5 -13   11.16    0.23
  -3  -5 -13  130.03    1.57
  -1  -5 -13   46.81    0.58
   1  -5 -13    2.01    0.08
   3  -5 -13   23.02    0.30
   5  -5 -13   35.77    0.45
   7  -5 -13  162.26    1.97
   9  -5 -13   21.59    0.37
  11  -5 -13   59.90    1.33
  13  -5 -13   71.91    1.60
 -16  -4 -13   24.28    0.63
 -14  -4 -13    1.48    0.15
 -12  -4 -13   11.65    0.28
 -10  -4 -13    1.92    0.14
  -8  -4 -13   18.05    0.33
  -6  -4 -13    0.22    0.09
  -4  -4 -13    1.30    0.07
  -2  -4 -13    0.40    0.05
   0  -4 -13    1.33    0.08
   2  -4 -13    6.56    0.12
   4  -4 -13   19.62    0.26
   6  -4 -13    8.74    0.15
   8  -4 -13   45.14    0.57
  10  -4 -13   14.81    0.44
  12  -4 -13   16.57    0.50
  14  -4 -13    0.72    0.23
  16  -4 -13    0.13    0.26
 -15  -3 -13   23.02    0.43
 -13  -3 -13   26.90    0.47
 -11  -3 -13   70.05    1.08
  -9  -3 -13   34.50    0.57
  -7  -3 -13  172.44    2.58
  -5  -3 -13   66.90    0.81
  -3  -3 -13  211.71    2.54
  -1  -3 -13    1.33    0.07
   1  -3 -13    5.94    0.11
   3  -3 -13   74.59    0.90
   5  -3 -13   10.95    0.17
   7  -3 -13  163.49    1.95
   9  -3 -13   81.95    1.00
  11  -3 -13   42.86    1.00
  13  -3 -13   55.50    1.28
  15  -3 -13   46.43    1.08
 -16  -2 -13    6.16    0.25
 -14  -2 -13    0.96    0.14
 -12  -2 -13   16.43    0.33
 -10  -2 -13    0.90    0.11
  -8  -2 -13    0.25    0.09
  -6  -2 -13    0.30    0.06
  -4  -2 -13    0.88    0.06
  -2  -2 -13    1.22    0.07
   0  -2 -13    5.22    0.11
   2  -2 -13    0.51    0.05
   4  -2 -13    0.91    0.06
   6  -2 -13    2.37    0.09
   8  -2 -13   54.10    0.67
  10  -2 -13    1.82    0.13
  12  -2 -13    2.87    0.17
  14  -2 -13    4.42    0.33
  16  -2 -13    0.07    0.25
 -17  -1 -13    1.90    0.17
 -15  -1 -13   14.77    0.33
 -13  -1 -13   26.88    0.47
 -11  -1 -13   38.02    0.62
  -9  -1 -13   85.06    1.29
  -7  -1 -13  240.50    2.94
  -5  -1 -13   88.70    1.07
  -3  -1 -13   49.33    0.60
  -1  -1 -13    0.66    0.06
   1  -1 -13   10.48    0.16
   3  -1 -13   86.19    1.05
   5  -1 -13   30.14    0.38
   7  -1 -13   54.45    0.67
   9  -1 -13    7.39    0.19
  11  -1 -13   69.78    1.50
  13  -1 -13   90.02    1.98
 -16   0 -13    0.20    0.15
 -14   0 -13   -0.10    0.13
 -12   0 -13    0.01    0.11
 -10   0 -13    0.04    0.10
  -8   0 -13    0.08    0.07
  -6   0 -13    0.12    0.07
  -4   0 -13    0.09    0.05
  -2   0 -13    0.14    0.05
   0   0 -13   -0.04    0.05
   2   0 -13   -0.07    0.05
   4   0 -13    0.11    0.05
   6   0 -13    0.01    0.05
   8   0 -13    0.36    0.09
  10   0 -13   -0.11    0.09
  12   0 -13   -0.03    0.12
  14   0 -13    0.00    0.13
  16   0 -13   -0.11    0.24
 -17   1 -13    1.82    0.17
 -15   1 -13   14.53    0.33
 -13   1 -13   26.73    0.47
 -11   1 -13   38.51    0.62
  -9   1 -13   85.80    1.05
  -7   1 -13  241.72    2.94
  -5   1 -13   87.26    1.29
  -3   1 -13   49.08    0.68
  -1   1 -13    0.75    0.06
   1   1 -13   10.34    0.16
   3   1 -13   85.23    1.05
   5   1 -13   29.38    0.38
   7   1 -13   54.28    0.85
   9   1 -13    7.52    0.19
  11   1 -13   67.62    1.06
  13   1 -13   91.94    1.40
  15   1 -13   38.62    0.65
  17   1 -13   18.98    0.58
 -16   2 -13    6.16    0.24
 -14   2 -13    0.92    0.14
 -12   2 -13   15.89    0.32
 -10   2 -13    0.94    0.09
  -8   2 -13    0.13    0.07
  -6   2 -13    0.15    0.06
  -4   2 -13    0.82    0.08
  -2   2 -13    1.20    0.09
   0   2 -13    5.19    0.11
   2   2 -13    0.46    0.05
   4   2 -13    0.73    0.06
   6   2 -13    2.17    0.08
   8   2 -13   54.25    0.85
  10   2 -13    1.82    0.15
  12   2 -13    2.58    0.18
  14   2 -13    4.33    0.21
  16   2 -13   -0.32    0.15
 -17   3 -13   12.79    0.46
 -15   3 -13   22.59    0.43
 -13   3 -13   26.32    0.47
 -11   3 -13   70.96    0.88
  -9   3 -13   35.01    0.46
  -7   3 -13  175.01    2.11
  -5   3 -13   65.62    0.82
  -3   3 -13  212.64    3.08
  -1   3 -13    1.33    0.09
   1   3 -13    5.90    0.11
   3   3 -13   73.76    0.91
   5   3 -13   10.60    0.16
   7   3 -13  161.80    2.43
   9   3 -13   82.30    1.26
  11   3 -13   44.40    0.71
  13   3 -13   57.97    0.91
  15   3 -13   46.27    0.76
  17   3 -13    6.09    0.26
 -16   4 -13   23.38    0.45
 -14   4 -13    1.64    0.15
 -12   4 -13   11.86    0.22
 -10   4 -13    1.84    0.12
  -8   4 -13   18.13    0.27
  -6   4 -13    0.31    0.07
  -4   4 -13    1.27    0.08
  -2   4 -13    0.30    0.07
   0   4 -13    1.28    0.09
   2   4 -13    6.22    0.12
   4   4 -13   19.50    0.27
   6   4 -13    8.44    0.20
   8   4 -13   44.69    0.72
  10   4 -13   15.68    0.31
  12   4 -13   17.12    0.34
  14   4 -13    0.88    0.14
  16   4 -13    0.81    0.16
 -15   5 -13   28.02    0.73
 -13   5 -13   60.86    0.77
 -11   5 -13   38.63    0.51
  -9   5 -13  111.15    1.39
  -7   5 -13  108.37    1.34
  -5   5 -13   11.40    0.18
  -3   5 -13  130.01    1.57
  -1   5 -13   46.92    0.71
   1   5 -13    1.89    0.10
   3   5 -13   22.91    0.31
   5   5 -13   35.00    0.58
   7   5 -13  163.11    2.46
   9   5 -13   21.11    0.39
  11   5 -13   59.76    0.94
  13   5 -13   73.29    1.14
  15   5 -13   41.73    0.59
  17   5 -13   20.63    0.43
 -16   6 -13    5.08    0.34
 -14   6 -13    8.98    0.26
 -12   6 -13    1.44    0.11
 -10   6 -13    8.75    0.18
  -8   6 -13   19.84    0.29
  -6   6 -13    2.49    0.11
  -4   6 -13    0.34    0.07
  -2   6 -13   18.07    0.25
   0   6 -13    0.25    0.07
   2   6 -13    0.31    0.05
   4   6 -13    0.26    0.09
   6   6 -13   11.84    0.26
   8   6 -13   39.87    0.65
  10   6 -13    4.49    0.19
  12   6 -13   19.19    0.31
  14   6 -13    1.10    0.13
  16   6 -13    0.86    0.14
 -15   7 -13    8.10    0.26
 -13   7 -13   57.88    0.91
 -11   7 -13   35.23    0.58
  -9   7 -13   72.09    0.90
  -7   7 -13   48.51    0.62
  -5   7 -13   44.73    0.57
  -3   7 -13   88.63    1.09
  -1   7 -13   10.10    0.17
   1   7 -13    1.71    0.13
   3   7 -13    0.27    0.07
   5   7 -13   48.16    0.63
   7   7 -13   33.97    0.46
   9   7 -13   83.67    1.07
  11   7 -13   49.59    0.67
  13   7 -13   46.07    0.63
  15   7 -13    9.49    0.24
 -14   8 -13    1.93    0.16
 -12   8 -13    9.85    0.27
 -10   8 -13    1.59    0.13
  -8   8 -13   12.58    0.27
  -6   8 -13   29.31    0.49
  -4   8 -13    0.24    0.10
  -2   8 -13    1.53    0.12
   0   8 -13   23.14    0.41
   2   8 -13    7.92    0.20
   4   8 -13   20.20    0.29
   6   8 -13    4.88    0.14
   8   8 -13    2.13    0.12
  10   8 -13   21.19    0.33
  12   8 -13   19.95    0.32
  14   8 -13    4.80    0.20
  16   8 -13    0.07    0.14
 -13   9 -13   19.20    0.38
 -11   9 -13    0.82    0.13
  -9   9 -13   62.52    0.98
  -7   9 -13   40.18    0.65
  -5   9 -13   29.54    0.49
  -3   9 -13   48.90    0.78
  -1   9 -13   73.73    1.14
   1   9 -13    0.39    0.10
   3   9 -13    1.51    0.12
   5   9 -13    1.99    0.12
   7   9 -13   21.56    0.33
   9   9 -13   43.06    0.58
  11   9 -13   25.77    0.39
  13   9 -13   38.55    0.54
  15   9 -13    4.30    0.21
 -14  10 -13   21.16    0.60
 -12  10 -13    1.15    0.15
 -10  10 -13   28.48    0.50
  -8  10 -13   74.47    1.15
  -6  10 -13   40.25    0.66
  -4  10 -13    5.97    0.19
  -2  10 -13    0.40    0.11
   0  10 -13   11.67    0.25
   2  10 -13    2.73    0.16
   4  10 -13    2.57    0.17
   6  10 -13   20.45    0.32
   8  10 -13    8.49    0.19
  10  10 -13   22.41    0.36
  12  10 -13   45.47    0.63
  14  10 -13   25.62    0.41
 -13  11 -13   14.01    0.49
 -11  11 -13   24.38    0.45
  -9  11 -13   29.50    0.51
  -7  11 -13   59.14    0.94
  -5  11 -13   29.74    0.51
  -3  11 -13    2.67    0.17
  -1  11 -13   18.28    0.35
   1  11 -13    4.92    0.19
   3  11 -13    7.65    0.22
   5  11 -13    1.85    0.14
   7  11 -13    7.02    0.18
   9  11 -13   22.15    0.35
  11  11 -13   20.81    0.37
  13  11 -13   24.71    0.49
 -12  12 -13    3.37    0.35
 -10  12 -13   43.64    0.71
  -8  12 -13   32.34    0.55
  -6  12 -13   26.82    0.47
  -4  12 -13   17.27    0.34
  -2  12 -13   11.50    0.27
   0  12 -13    0.08    0.11
   2  12 -13    0.38    0.12
   4  12 -13    0.36    0.13
   6  12 -13   22.87    0.43
   8  12 -13   13.26    0.25
  10  12 -13   15.77    0.28
  12  12 -13   18.77    0.33
 -11  13 -13   19.21    0.58
  -9  13 -13    8.92    0.39
  -7  13 -13   15.33    0.33
  -5  13 -13   30.21    0.52
  -3  13 -13   17.31    0.35
  -1  13 -13    1.75    0.15
   1  13 -13    7.74    0.23
   3  13 -13    4.02    0.20
   5  13 -13    0.51    0.14
   7  13 -13    9.21    0.27
   9  13 -13    3.18    0.18
  11  13 -13   13.12    0.27
 -10  14 -13   23.24    0.66
  -8  14 -13   38.04    0.93
  -6  14 -13   54.20    0.88
  -4  14 -13   11.92    0.29
  -2  14 -13    4.35    0.20
   0  14 -13    1.75    0.14
   2  14 -13    0.74    0.14
   4  14 -13   15.47    0.34
   6  14 -13   16.91    0.36
   8  14 -13   29.71    0.54
  10  14 -13   29.18    0.54
  -9  15 -13   17.02    0.54
  -7  15 -13   12.01    0.44
  -5  15 -13   17.62    0.37
  -3  15 -13    4.32    0.21
  -1  15 -13    4.82    0.22
   1  15 -13    0.42    0.14
   3  15 -13   -0.05    0.14
   5  15 -13    2.90    0.22
   7  15 -13   19.23    0.40
   9  15 -13   12.30    0.33
  -8  16 -13   25.61    0.70
  -6  16 -13   21.15    0.60
  -4  16 -13    7.37    0.25
  -2  16 -13   13.55    0.32
   0  16 -13    6.28    0.24
   2  16 -13    0.51    0.15
   4  16 -13    0.19    0.15
   6  16 -13    0.50    0.16
   8  16 -13   21.29    0.44
  -5  17 -13    0.22    0.23
  -3  17 -13    3.03    0.22
  -1  17 -13    0.30    0.15
   1  17 -13    0.44    0.15
   3  17 -13    0.05    0.15
   5  17 -13    0.05    0.16
   7  17 -13    0.52    0.26
  -2  18 -13   19.31    0.59
   0  18 -13    5.45    0.25
   2  18 -13    1.46    0.17
   4  18 -13    7.26    0.42
  -4 -18 -12    0.99    0.28
  -2 -18 -12    6.23    0.39
   0 -18 -12   -0.17    0.25
   2 -18 -12    1.62    0.28
   4 -18 -12    1.48    0.27
  -7 -17 -12   10.04    0.44
  -5 -17 -12   11.67    0.46
  -3 -17 -12   22.27    0.62
  -1 -17 -12   27.25    0.71
   1 -17 -12    0.63    0.25
   3 -17 -12   -0.05    0.24
   5 -17 -12   -0.11    0.23
   7 -17 -12    7.86    0.40
  -8 -16 -12   10.81    0.43
  -6 -16 -12   12.37    0.46
  -4 -16 -12   16.39    0.51
  -2 -16 -12   14.61    0.47
   0 -16 -12    2.79    0.32
   2 -16 -12    6.55    0.36
   4 -16 -12    0.27    0.23
   6 -16 -12    0.44    0.16
   8 -16 -12    6.16    0.25
  -9 -15 -12   25.05    0.65
  -7 -15 -12   23.08    0.63
  -5 -15 -12   39.67    0.96
  -3 -15 -12   27.30    0.69
  -1 -15 -12   21.19    0.58
   1 -15 -12   10.10    0.40
   3 -15 -12    2.22    0.24
   5 -15 -12   -0.06    0.14
   7 -15 -12   13.27    0.31
   9 -15 -12   11.09    0.29
 -10 -14 -12   12.40    0.44
  -8 -14 -12   13.68    0.44
  -6 -14 -12   12.54    0.42
  -4 -14 -12    5.91    0.33
  -2 -14 -12    3.70    0.29
   0 -14 -12    1.92    0.22
   2 -14 -12   20.21    0.55
   4 -14 -12   28.92    0.50
   6 -14 -12    0.65    0.14
   8 -14 -12   12.63    0.29
  10 -14 -12    3.42    0.23
  12 -14 -12   20.84    0.56
 -11 -13 -12   26.07    0.67
  -9 -13 -12   10.87    0.40
  -7 -13 -12   26.05    0.65
  -5 -13 -12   41.37    0.95
  -3 -13 -12   28.12    0.69
  -1 -13 -12   27.38    0.67
   1 -13 -12    9.23    0.36
   3 -13 -12   12.11    0.26
   5 -13 -12    3.16    0.18
   7 -13 -12   12.52    0.28
   9 -13 -12   23.08    0.42
  11 -13 -12   23.47    0.44
  13 -13 -12   21.10    0.56
 -12 -12 -12   31.85    0.77
 -10 -12 -12   31.88    0.76
  -8 -12 -12   28.20    0.69
  -6 -12 -12   43.99    0.99
  -4 -12 -12   14.84    0.44
  -2 -12 -12   15.34    0.45
   0 -12 -12    9.18    0.34
   2 -12 -12    0.30    0.10
   4 -12 -12    0.62    0.11
   6 -12 -12    1.49    0.13
   8 -12 -12    6.09    0.21
  10 -12 -12   15.87    0.33
  12 -12 -12   11.52    0.39
 -13 -11 -12    0.65    0.22
 -11 -11 -12   11.77    0.40
  -9 -11 -12   66.67    1.46
  -7 -11 -12    3.70    0.27
  -5 -11 -12   26.18    0.64
  -3 -11 -12   35.21    0.82
  -1 -11 -12   27.82    0.67
   1 -11 -12   17.39    0.31
   3 -11 -12   43.22    0.67
   5 -11 -12    0.25    0.11
   7 -11 -12   14.12    0.29
   9 -11 -12    6.76    0.22
  11 -11 -12   10.36    0.35
  13 -11 -12   23.87    0.60
 -14 -10 -12    3.45    0.31
 -12 -10 -12    1.38    0.22
 -10 -10 -12   21.39    0.56
  -8 -10 -12   43.48    0.98
  -6 -10 -12   10.92    0.35
  -4 -10 -12   66.89    1.01
  -2 -10 -12   16.86    0.31
   0 -10 -12   26.39    0.44
   2 -10 -12    0.32    0.09
   4 -10 -12   25.97    0.43
   6 -10 -12    3.42    0.16
   8 -10 -12    1.19    0.12
  10 -10 -12   13.82    0.29
  12 -10 -12   18.44    0.37
 -15  -9 -12   -0.08    0.21
 -13  -9 -12    2.19    0.22
 -11  -9 -12   18.86    0.52
  -9  -9 -12   31.84    0.75
  -7  -9 -12   37.49    0.60
  -5  -9 -12   37.23    0.60
  -3  -9 -12    1.31    0.11
  -1  -9 -12    3.39    0.13
   1  -9 -12    0.24    0.06
   3  -9 -12   48.84    0.75
   5  -9 -12    7.18    0.19
   7  -9 -12    0.21    0.11
   9  -9 -12   57.07    1.20
  11  -9 -12   17.76    0.34
  13  -9 -12   10.96    0.45
 -14  -8 -12    7.19    0.34
 -12  -8 -12   11.56    0.39
 -10  -8 -12   13.40    0.29
  -8  -8 -12  106.14    1.61
  -6  -8 -12   12.21    0.25
  -4  -8 -12  104.78    1.57
  -2  -8 -12   65.72    0.99
   0  -8 -12   48.33    0.59
   2  -8 -12    3.69    0.10
   4  -8 -12    5.97    0.16
   6  -8 -12   26.14    0.43
   8  -8 -12   12.32    0.25
  10  -8 -12   59.96    0.91
  12  -8 -12   26.19    0.45
 -15  -7 -12    0.96    0.22
 -13  -7 -12    0.28    0.19
 -11  -7 -12   17.78    0.35
  -9  -7 -12   10.40    0.24
  -7  -7 -12    1.95    0.14
  -5  -7 -12   11.97    0.24
  -3  -7 -12    1.65    0.11
  -1  -7 -12   16.92    0.23
   1  -7 -12    0.19    0.05
   3  -7 -12    7.92    0.14
   5  -7 -12    0.96    0.07
   7  -7 -12    0.43    0.10
   9  -7 -12   12.96    0.26
  11  -7 -12   17.43    0.33
  13  -7 -12    7.89    0.39
 -16  -6 -12    2.45    0.30
 -14  -6 -12   18.02    0.51
 -12  -6 -12   20.97    0.39
 -10  -6 -12   22.16    0.40
  -8  -6 -12  135.42    2.02
  -6  -6 -12   99.73    1.50
  -4  -6 -12  206.05    3.06
  -2  -6 -12   70.05    0.85
   0  -6 -12   90.38    1.08
   2  -6 -12    1.22    0.07
   4  -6 -12    1.91    0.08
   6  -6 -12   55.99    0.69
   8  -6 -12    1.73    0.13
  10  -6 -12   31.35    0.51
  16  -6 -12   36.42    0.91
 -15  -5 -12    6.32    0.32
 -13  -5 -12    0.27    0.13
 -11  -5 -12    8.17    0.22
  -9  -5 -12   35.21    0.57
  -7  -5 -12   58.90    0.92
  -5  -5 -12    2.88    0.13
  -3  -5 -12   18.40    0.25
  -1  -5 -12    0.53    0.05
   1  -5 -12    4.84    0.10
   3  -5 -12    1.11    0.07
   5  -5 -12    1.86    0.08
   7  -5 -12   31.78    0.41
   9  -5 -12   18.77    0.33
  11  -5 -12    5.51    0.30
  13  -5 -12   19.96    0.56
  15  -5 -12   -0.08    0.25
 -16  -4 -12    0.11    0.21
 -14  -4 -12   15.61    0.33
 -12  -4 -12   10.44    0.25
 -10  -4 -12   91.85    1.40
  -8  -4 -12   75.10    1.14
  -6  -4 -12   62.34    0.96
  -4  -4 -12  244.54    2.93
  -2  -4 -12  177.90    2.13
   0  -4 -12   49.13    0.61
   2  -4 -12   13.18    0.19
   4  -4 -12    4.21    0.10
   6  -4 -12   53.38    0.66
   8  -4 -12   37.25    0.47
  10  -4 -12   32.64    0.52
  12  -4 -12   79.69    1.76
  14  -4 -12   58.13    1.33
 -17  -3 -12   -0.02    0.21
 -15  -3 -12    1.20    0.15
 -13  -3 -12    1.83    0.15
 -11  -3 -12    5.31    0.19
  -9  -3 -12    7.83    0.20
  -7  -3 -12    2.12    0.13
  -5  -3 -12   24.79    0.32
  -3  -3 -12    1.05    0.06
  -1  -3 -12    7.62    0.12
   1  -3 -12   49.44    0.65
   3  -3 -12    1.43    0.07
   5  -3 -12    0.62    0.05
   7  -3 -12   15.82    0.22
   9  -3 -12    0.91    0.07
  11  -3 -12    1.88    0.13
  13  -3 -12   11.66    0.41
  15  -3 -12    0.77    0.24
  17  -3 -12    7.96    0.43
 -16  -2 -12    5.11    0.23
 -14  -2 -12    0.48    0.13
 -12  -2 -12   15.07    0.31
 -10  -2 -12   62.61    0.97
  -8  -2 -12   40.93    0.65
  -6  -2 -12  152.96    1.83
  -4  -2 -12  140.40    1.68
  -2  -2 -12  122.08    1.45
   0  -2 -12   16.21    0.22
   2  -2 -12    1.10    0.07
   4  -2 -12    1.70    0.07
   6  -2 -12    2.31    0.08
   8  -2 -12  114.86    1.39
  10  -2 -12  111.83    1.70
  12  -2 -12   37.71    0.61
  14  -2 -12   72.21    1.59
 -17  -1 -12    1.24    0.22
 -15  -1 -12    4.38    0.21
 -13  -1 -12    3.38    0.18
 -11  -1 -12    1.42    0.12
  -9  -1 -12   11.08    0.24
  -7  -1 -12    0.86    0.07
  -5  -1 -12   14.24    0.23
  -3  -1 -12    3.23    0.09
  -1  -1 -12    9.41    0.15
   1  -1 -12    0.99    0.07
   3  -1 -12    2.39    0.08
   5  -1 -12    9.81    0.15
   7  -1 -12   10.13    0.16
   9  -1 -12    7.35    0.18
  11  -1 -12   10.03    0.23
  13  -1 -12    6.82    0.21
  15  -1 -12    0.02    0.22
  17  -1 -12    1.15    0.27
 -16   0 -12    4.26    0.22
 -14   0 -12    7.02    0.23
 -12   0 -12    9.94    0.24
 -10   0 -12   64.77    1.00
  -8   0 -12   60.83    0.75
  -6   0 -12  124.20    1.80
  -4   0 -12  187.57    2.24
  -2   0 -12  278.36    3.33
   0   0 -12    6.20    0.11
   2   0 -12   21.06    0.28
   4   0 -12    0.94    0.06
   6   0 -12   60.49    0.75
   8   0 -12    9.37    0.20
  10   0 -12    4.50    0.16
  12   0 -12   68.67    1.06
  14   0 -12   98.35    2.08
  18   0 -12   18.87    0.60
 -17   1 -12    1.13    0.16
 -15   1 -12    4.23    0.21
 -13   1 -12    3.37    0.18
 -11   1 -12    1.63    0.11
  -9   1 -12   11.33    0.19
  -7   1 -12    0.76    0.07
  -5   1 -12   14.49    0.25
  -3   1 -12    3.16    0.09
  -1   1 -12    9.16    0.14
   1   1 -12    1.10    0.07
   3   1 -12    2.49    0.08
   5   1 -12    9.61    0.15
   7   1 -12    9.89    0.15
   9   1 -12    7.42    0.19
  11   1 -12   10.31    0.24
  13   1 -12    7.47    0.22
  15   1 -12   -0.19    0.13
  17   1 -12    1.88    0.27
 -16   2 -12    4.71    0.22
 -14   2 -12    0.53    0.13
 -12   2 -12   15.25    0.24
 -10   2 -12   63.87    0.79
  -8   2 -12   41.54    0.52
  -6   2 -12  152.84    1.83
  -4   2 -12  137.98    2.03
  -2   2 -12  120.44    1.45
   0   2 -12   15.94    0.22
   2   2 -12    1.19    0.07
   4   2 -12    1.70    0.07
   6   2 -12    2.27    0.07
   8   2 -12  114.05    1.73
  10   2 -12  113.75    1.71
  12   2 -12   38.56    0.62
  14   2 -12   74.18    1.13
  16   2 -12   54.53    0.87
  18   2 -12   16.33    0.55
 -17   3 -12    0.10    0.15
 -15   3 -12    0.96    0.14
 -13   3 -12    1.86    0.11
 -11   3 -12    5.33    0.14
  -9   3 -12    7.99    0.16
  -7   3 -12    1.97    0.10
  -5   3 -12   24.80    0.33
  -3   3 -12    0.87    0.07
  -1   3 -12    7.27    0.15
   1   3 -12   49.40    0.61
   3   3 -12    1.29    0.07
   5   3 -12    0.59    0.05
   7   3 -12   15.82    0.29
   9   3 -12    0.63    0.10
  11   3 -12    1.80    0.14
  13   3 -12   11.58    0.27
  15   3 -12    0.57    0.14
  17   3 -12    7.29    0.27
 -16   4 -12   -0.03    0.14
 -14   4 -12   15.70    0.26
 -12   4 -12   10.31    0.20
 -10   4 -12   92.49    1.17
  -8   4 -12   75.13    0.93
  -6   4 -12   63.69    0.78
  -4   4 -12  245.22    2.94
  -2   4 -12  175.86    2.58
   0   4 -12   49.07    0.73
   2   4 -12   13.00    0.20
   4   4 -12    4.09    0.09
   6   4 -12   52.51    0.83
   8   4 -12   37.24    0.60
  10   4 -12   33.12    0.55
  12   4 -12   81.70    1.25
  14   4 -12   59.61    0.94
  16   4 -12   42.36    0.71
 -17   5 -12    0.79    0.21
 -15   5 -12    6.22    0.23
 -13   5 -12    0.05    0.10
 -11   5 -12    8.27    0.18
  -9   5 -12   35.41    0.46
  -7   5 -12   60.13    0.75
  -5   5 -12    2.80    0.10
  -3   5 -12   18.81    0.26
  -1   5 -12    0.28    0.06
   1   5 -12    4.96    0.12
   3   5 -12    1.05    0.06
   5   5 -12    1.86    0.12
   7   5 -12   31.36    0.52
   9   5 -12   19.12    0.35
  11   5 -12    5.54    0.20
  13   5 -12   19.32    0.37
  15   5 -12    0.23    0.12
  17   5 -12    7.69    0.23
 -16   6 -12    2.77    0.30
 -14   6 -12   18.59    0.36
 -12   6 -12   21.02    0.32
 -10   6 -12   22.27    0.32
  -8   6 -12  135.43    1.65
  -6   6 -12  100.39    1.22
  -4   6 -12  208.36    2.50
  -2   6 -12   68.82    0.85
   0   6 -12   89.18    1.38
   2   6 -12    1.39    0.09
   4   6 -12    1.90    0.11
   6   6 -12   56.22    0.88
   8   6 -12    1.72    0.13
  10   6 -12   31.85    0.44
  12   6 -12   64.57    0.84
  14   6 -12   35.13    0.50
  16   6 -12   35.07    0.52
 -15   7 -12    1.04    0.15
 -13   7 -12    0.18    0.12
 -11   7 -12   17.93    0.34
  -9   7 -12   10.84    0.24
  -7   7 -12    1.91    0.11
  -5   7 -12   11.65    0.19
  -3   7 -12    1.53    0.10
  -1   7 -12   16.44    0.30
   1   7 -12    0.16    0.05
   3   7 -12    7.93    0.17
   5   7 -12    0.82    0.08
   7   7 -12    0.36    0.08
   9   7 -12   12.62    0.22
  11   7 -12   17.38    0.29
  13   7 -12    7.10    0.20
  15   7 -12    6.84    0.21
  17   7 -12    4.26    0.37
 -14   8 -12    7.46    0.25
 -12   8 -12   11.52    0.28
 -10   8 -12   13.59    0.29
  -8   8 -12  107.38    1.62
  -6   8 -12   11.91    0.25
  -4   8 -12  105.06    1.59
  -2   8 -12   65.00    1.01
   0   8 -12   46.92    0.75
   2   8 -12    3.94    0.11
   4   8 -12    6.28    0.14
   6   8 -12   26.41    0.37
   8   8 -12   11.86    0.22
  10   8 -12   59.68    0.78
  12   8 -12   25.79    0.39
  14   8 -12   27.18    0.41
  16   8 -12   23.91    0.49
 -15   9 -12   -0.04    0.22
 -13   9 -12    2.23    0.17
 -11   9 -12   19.89    0.38
  -9   9 -12   32.58    0.54
  -7   9 -12   37.22    0.61
  -5   9 -12   38.14    0.61
  -3   9 -12    1.28    0.11
  -1   9 -12    3.20    0.15
   1   9 -12    0.13    0.09
   3   9 -12   49.17    0.64
   5   9 -12    7.09    0.16
   7   9 -12    0.18    0.09
   9   9 -12   56.47    0.74
  11   9 -12   17.18    0.29
  13   9 -12   11.42    0.24
  15   9 -12    8.26    0.23
 -14  10 -12    3.47    0.34
 -12  10 -12    1.21    0.14
 -10  10 -12   22.13    0.40
  -8  10 -12   43.88    0.71
  -6  10 -12   10.93    0.25
  -4  10 -12   65.22    1.02
  -2  10 -12   17.14    0.32
   0  10 -12   26.15    0.45
   2  10 -12    0.31    0.10
   4  10 -12   26.27    0.37
   6  10 -12    3.26    0.14
   8  10 -12    1.22    0.11
  10  10 -12   13.27    0.25
  12  10 -12   18.18    0.31
  14  10 -12   27.62    0.45
 -13  11 -12    0.59    0.23
 -11  11 -12   12.01    0.29
  -9  11 -12   68.45    1.06
  -7  11 -12    3.56    0.18
  -5  11 -12   26.57    0.46
  -3  11 -12   35.63    0.59
  -1  11 -12   28.29    0.48
   1  11 -12   17.26    0.33
   3  11 -12   42.66    0.69
   5  11 -12    0.24    0.09
   7  11 -12   14.07    0.25
   9  11 -12    6.97    0.19
  11  11 -12    9.72    0.22
  13  11 -12   23.47    0.38
 -12  12 -12   32.31    0.80
 -10  12 -12   30.78    0.78
  -8  12 -12   28.40    0.50
  -6  12 -12   43.96    0.72
  -4  12 -12   15.38    0.31
  -2  12 -12   16.06    0.32
   0  12 -12    9.27    0.24
   2  12 -12    0.13    0.11
   4  12 -12    0.57    0.12
   6  12 -12    1.36    0.11
   8  12 -12    5.91    0.18
  10  12 -12   15.44    0.28
  12  12 -12   11.53    0.25
  14  12 -12   25.59    0.49
 -11  13 -12   27.16    0.71
  -9  13 -12   10.56    0.41
  -7  13 -12   26.26    0.47
  -5  13 -12   41.56    0.68
  -3  13 -12   28.27    0.49
  -1  13 -12   27.47    0.48
   1  13 -12    9.91    0.25
   3  13 -12   11.97    0.28
   5  13 -12    3.01    0.19
   7  13 -12   12.32    0.24
   9  13 -12   22.75    0.36
  11  13 -12   22.86    0.37
  13  13 -12   20.37    0.35
 -10  14 -12   12.54    0.46
  -8  14 -12   12.77    0.45
  -6  14 -12   12.00    0.29
  -4  14 -12    6.24    0.22
  -2  14 -12    3.77    0.19
   0  14 -12    1.78    0.16
   2  14 -12   20.41    0.39
   4  14 -12   29.89    0.52
   6  14 -12    0.26    0.14
   8  14 -12   12.04    0.31
  10  14 -12    3.20    0.19
  12  14 -12   19.83    0.35
  -9  15 -12   23.39    0.66
  -7  15 -12   23.70    0.64
  -5  15 -12   40.23    0.68
  -3  15 -12   27.23    0.49
  -1  15 -12   21.44    0.41
   1  15 -12   10.32    0.27
   3  15 -12    2.47    0.20
   5  15 -12   -0.20    0.14
   7  15 -12   13.46    0.33
   9  15 -12   10.60    0.30
  11  15 -12   12.47    0.33
  -8  16 -12   10.22    0.44
  -6  16 -12   12.07    0.44
  -4  16 -12   15.46    0.34
  -2  16 -12   13.76    0.32
   0  16 -12    3.42    0.21
   2  16 -12    6.46    0.24
   4  16 -12    0.53    0.15
   6  16 -12    0.29    0.15
   8  16 -12    6.10    0.26
  -7  17 -12   10.26    0.44
  -5  17 -12   12.32    0.45
  -3  17 -12   20.92    0.60
  -1  17 -12   27.06    0.50
   1  17 -12    0.65    0.15
   3  17 -12    0.04    0.15
   5  17 -12    0.14    0.16
   7  17 -12    8.13    0.29
  -4  18 -12    0.89    0.24
  -2  18 -12    5.34    0.36
   0  18 -12   -0.02    0.15
   2  18 -12    1.53    0.17
   4  18 -12    1.78    0.18
  -4 -18 -11   18.06    0.56
  -2 -18 -11   23.36    0.65
   0 -18 -11    7.03    0.40
   2 -18 -11    6.43    0.38
   4 -18 -11    2.06    0.27
   6 -18 -11    0.18    0.25
  -7 -17 -11    0.36    0.25
  -5 -17 -11    0.21    0.24
  -3 -17 -11    9.03    0.41
  -1 -17 -11    6.36    0.37
   1 -17 -11    0.37    0.24
   3 -17 -11    1.02    0.24
   5 -17 -11    2.58    0.32
   7 -17 -11   -0.02    0.16
  -8 -16 -11   10.33    0.41
  -6 -16 -11   15.23    0.49
  -4 -16 -11   31.03    0.77
  -2 -16 -11   17.67    0.52
   0 -16 -11   18.72    0.57
   2 -16 -11   15.19    0.49
   4 -16 -11    0.73    0.22
   6 -16 -11    1.11    0.15
   8 -16 -11    5.35    0.24
  10 -16 -11    0.07    0.17
  -9 -15 -11    4.19    0.33
  -7 -15 -11    2.25    0.24
  -5 -15 -11    7.42    0.36
  -3 -15 -11    2.81    0.30
  -1 -15 -11    2.45    0.24
   1 -15 -11    4.58    0.31
   3 -15 -11   14.52    0.45
   5 -15 -11    2.80    0.19
   7 -15 -11    0.43    0.14
   9 -15 -11    2.47    0.22
  11 -15 -11    2.35    0.18
 -12 -14 -11    2.57    0.31
 -10 -14 -11    7.08    0.36
  -8 -14 -11   15.89    0.48
  -6 -14 -11   44.04    1.00
  -4 -14 -11   17.71    0.51
  -2 -14 -11   52.65    1.17
   0 -14 -11   25.99    0.65
   2 -14 -11   54.98    1.23
   4 -14 -11    0.63    0.12
   6 -14 -11    0.77    0.13
   8 -14 -11   12.39    0.29
  10 -14 -11    2.21    0.17
  12 -14 -11   32.10    0.78
 -13 -13 -11    0.36    0.23
 -11 -13 -11    2.96    0.29
  -9 -13 -11    3.32    0.29
  -7 -13 -11   35.58    0.83
  -5 -13 -11    0.67    0.19
  -3 -13 -11    1.92    0.21
  -1 -13 -11   19.71    0.52
   1 -13 -11   12.56    0.40
   3 -13 -11    2.02    0.16
   5 -13 -11    5.79    0.20
   7 -13 -11    1.49    0.14
   9 -13 -11    6.14    0.23
  11 -13 -11    1.96    0.20
  13 -13 -11    6.18    0.26
 -12 -12 -11    6.92    0.34
 -10 -12 -11   17.22    0.49
  -8 -12 -11   18.75    0.51
  -6 -12 -11   16.45    0.46
  -4 -12 -11   18.06    0.48
  -2 -12 -11   77.49    1.65
   0 -12 -11   70.80    1.54
   2 -12 -11   57.03    0.88
   4 -12 -11    2.17    0.15
   6 -12 -11    8.83    0.23
   8 -12 -11    0.74    0.13
  10 -12 -11    2.34    0.19
  12 -12 -11   18.74    0.51
  14 -12 -11    5.29    0.32
 -13 -11 -11    0.46    0.21
 -11 -11 -11    8.12    0.34
  -9 -11 -11    8.81    0.35
  -7 -11 -11   11.39    0.37
  -5 -11 -11   41.51    0.94
  -3 -11 -11   45.18    1.02
  -1 -11 -11   15.31    0.42
   1 -11 -11    3.21    0.14
   3 -11 -11    1.02    0.10
   5 -11 -11    0.33    0.11
   7 -11 -11    2.39    0.17
   9 -11 -11    4.97    0.20
  11 -11 -11   12.03    0.29
  13 -11 -11   18.64    0.49
 -14 -10 -11   -0.17    0.21
 -12 -10 -11    0.98    0.20
 -10 -10 -11   21.81    0.55
  -8 -10 -11   81.41    1.74
  -6 -10 -11   10.29    0.34
  -4 -10 -11   57.99    1.25
  -2 -10 -11   77.35    1.18
   0 -10 -11   23.46    0.32
   2 -10 -11   68.14    1.02
   4 -10 -11    6.71    0.18
   6 -10 -11    6.16    0.18
   8 -10 -11   16.16    0.31
  10 -10 -11   13.83    0.29
  12 -10 -11   23.98    0.58
 -15  -9 -11    0.37    0.22
 -13  -9 -11    0.19    0.19
 -11  -9 -11    0.50    0.19
  -9  -9 -11   74.44    1.62
  -7  -9 -11    3.65    0.16
  -5  -9 -11   49.67    0.76
  -3  -9 -11   53.57    0.82
  -1  -9 -11   23.89    0.31
   1  -9 -11    3.92    0.10
   3  -9 -11   40.98    0.64
   5  -9 -11    0.12    0.09
   7  -9 -11   16.83    0.31
   9  -9 -11    1.01    0.12
  11  -9 -11    9.20    0.31
  13  -9 -11   27.79    0.63
 -16  -8 -11    0.12    0.22
 -14  -8 -11   -0.10    0.19
 -12  -8 -11   18.40    0.49
 -10  -8 -11   15.89    0.44
  -8  -8 -11   45.70    0.72
  -6  -8 -11    9.65    0.21
  -4  -8 -11   16.80    0.30
  -2  -8 -11   24.80    0.32
   0  -8 -11    6.06    0.12
   2  -8 -11   48.89    0.61
   4  -8 -11    0.13    0.05
   6  -8 -11    2.76    0.14
   8  -8 -11    3.24    0.16
  10  -8 -11   12.67    0.27
  12  -8 -11   13.75    0.29
 -15  -7 -11    4.89    0.32
 -13  -7 -11    8.35    0.33
 -11  -7 -11    1.19    0.18
  -9  -7 -11   48.37    0.76
  -7  -7 -11  142.98    2.13
  -5  -7 -11  245.92    3.63
  -3  -7 -11   90.60    1.35
  -1  -7 -11  171.21    2.02
   1  -7 -11   71.74    0.87
   3  -7 -11   12.52    0.18
   5  -7 -11    0.15    0.05
   7  -7 -11    2.23    0.13
   9  -7 -11    1.54    0.13
  11  -7 -11   37.67    0.59
 -16  -6 -11    0.35    0.21
 -14  -6 -11    0.23    0.19
 -12  -6 -11    2.88    0.18
 -10  -6 -11   36.35    0.59
  -8  -6 -11   74.32    1.14
  -6  -6 -11   38.33    0.61
  -4  -6 -11   69.42    1.06
  -2  -6 -11   48.09    0.59
   0  -6 -11   28.44    0.36
   2  -6 -11   13.23    0.19
   4  -6 -11    6.81    0.12
   6  -6 -11    2.09    0.08
   8  -6 -11    5.86    0.16
  10  -6 -11    0.02    0.10
  14  -6 -11    8.42    0.40
  16  -6 -11   14.33    0.52
 -17  -5 -11   14.10    0.45
 -15  -5 -11    1.61    0.20
 -13  -5 -11    1.74    0.14
 -11  -5 -11    1.87    0.14
  -9  -5 -11   63.36    0.99
  -7  -5 -11   66.75    1.02
  -5  -5 -11  284.10    4.18
  -3  -5 -11  259.13    3.10
  -1  -5 -11   54.02    0.66
   1  -5 -11  100.81    1.21
   3  -5 -11   41.01    0.51
   5  -5 -11    0.50    0.05
   7  -5 -11    3.94    0.10
   9  -5 -11   28.85    0.46
  11  -5 -11   96.38    1.93
  17  -5 -11   27.80    0.75
 -16  -4 -11    1.54    0.22
 -14  -4 -11   11.47    0.27
 -12  -4 -11    7.07    0.21
 -10  -4 -11    0.25    0.10
  -8  -4 -11   17.46    0.32
  -6  -4 -11   78.12    1.18
  -4  -4 -11   27.89    0.36
  -2  -4 -11    1.23    0.06
   0  -4 -11   41.40    0.51
   2  -4 -11    4.62    0.09
   4  -4 -11    1.02    0.06
   6  -4 -11    2.16    0.08
   8  -4 -11    8.80    0.15
  10  -4 -11   15.28    0.28
  12  -4 -11    0.64    0.20
  14  -4 -11   10.13    0.41
  16  -4 -11    4.79    0.38
 -17  -3 -11    0.68    0.21
 -15  -3 -11    2.08    0.21
 -13  -3 -11    0.19    0.12
 -11  -3 -11   15.56    0.30
  -9  -3 -11  129.41    1.95
  -7  -3 -11  225.98    3.36
  -5  -3 -11  138.12    1.65
  -3  -3 -11  355.19    4.24
  -1  -3 -11  159.18    1.89
   1  -3 -11  263.12    3.13
   3  -3 -11  128.80    1.54
   5  -3 -11   47.17    0.58
   7  -3 -11    0.38    0.06
   9  -3 -11   15.93    0.23
  11  -3 -11   95.81    1.46
  13  -3 -11   87.91    1.90
 -16  -2 -11   -0.13    0.19
 -14  -2 -11    2.03    0.18
 -12  -2 -11    6.26    0.20
 -10  -2 -11    0.23    0.09
  -8  -2 -11   14.27    0.25
  -6  -2 -11   11.51    0.19
  -4  -2 -11   72.14    0.87
  -2  -2 -11    0.72    0.05
   0  -2 -11  138.45    1.65
   2  -2 -11    7.29    0.12
   4  -2 -11    0.19    0.05
   6  -2 -11    1.20    0.07
   8  -2 -11   30.23    0.39
  10  -2 -11    0.11    0.09
  12  -2 -11   13.04    0.27
  14  -2 -11    0.42    0.21
  16  -2 -11    1.76    0.26
  18  -2 -11   10.83    0.49
 -17  -1 -11    0.70    0.21
 -15  -1 -11    0.22    0.13
 -13  -1 -11    4.06    0.19
 -11  -1 -11   24.21    0.42
  -9  -1 -11   56.31    0.69
  -7  -1 -11  107.35    1.54
  -5  -1 -11  168.33    2.01
  -3  -1 -11  372.22    4.42
  -1  -1 -11  281.64    3.35
   1  -1 -11  165.75    1.99
   3  -1 -11   29.57    0.37
   5  -1 -11   11.62    0.16
   7  -1 -11   18.53    0.25
   9  -1 -11   44.66    0.70
  11  -1 -11   59.75    0.92
  13  -1 -11  120.36    1.81
  15  -1 -11   56.43    1.27
 -18   0 -11    0.18    0.21
 -16   0 -11    0.05    0.13
 -14   0 -11   -0.06    0.12
 -12   0 -11    0.13    0.10
 -10   0 -11   -0.02    0.07
  -8   0 -11    0.05    0.06
  -6   0 -11    0.09    0.06
  -4   0 -11    0.23    0.05
  -2   0 -11    0.04    0.04
   0   0 -11    0.10    0.04
   2   0 -11    0.06    0.04
   4   0 -11    0.10    0.05
   6   0 -11    0.03    0.04
   8   0 -11    0.09    0.05
  10   0 -11    0.08    0.09
  12   0 -11   -0.07    0.11
  14   0 -11    0.00    0.12
  16   0 -11    0.29    0.23
  18   0 -11    0.24    0.27
 -17   1 -11    0.86    0.15
 -15   1 -11    0.28    0.13
 -13   1 -11    4.68    0.19
 -11   1 -11   24.68    0.37
  -9   1 -11   55.92    0.70
  -7   1 -11  104.74    1.28
  -5   1 -11  167.96    2.44
  -3   1 -11  363.95    4.40
  -1   1 -11  277.83    3.35
   1   1 -11  164.55    1.99
   3   1 -11   29.15    0.37
   5   1 -11   11.28    0.16
   7   1 -11   18.05    0.25
   9   1 -11   44.62    0.70
  11   1 -11   60.33    0.97
  13   1 -11  120.31    2.59
  15   1 -11   55.98    0.89
  17   1 -11   36.93    0.91
 -16   2 -11    0.00    0.13
 -14   2 -11    1.99    0.15
 -12   2 -11    6.61    0.15
 -10   2 -11    0.05    0.07
  -8   2 -11   14.47    0.21
  -6   2 -11   11.82    0.18
  -4   2 -11   70.87    0.87
  -2   2 -11    0.64    0.06
   0   2 -11  135.88    1.65
   2   2 -11    7.09    0.12
   4   2 -11    0.08    0.04
   6   2 -11    1.10    0.06
   8   2 -11   29.99    0.49
  10   2 -11    0.07    0.09
  12   2 -11   13.66    0.28
  14   2 -11    0.08    0.12
  16   2 -11    1.70    0.16
  18   2 -11   11.48    0.46
 -17   3 -11    0.92    0.21
 -15   3 -11    1.82    0.14
 -13   3 -11    0.25    0.09
 -11   3 -11   15.56    0.27
  -9   3 -11  130.74    1.59
  -7   3 -11  228.48    2.74
  -5   3 -11  136.84    1.66
  -3   3 -11  351.90    4.24
  -1   3 -11  157.92    2.29
   1   3 -11  260.24    3.13
   3   3 -11  127.21    1.54
   5   3 -11   46.65    0.58
   7   3 -11    0.32    0.08
   9   3 -11   15.69    0.30
  11   3 -11   97.27    1.46
  13   3 -11   88.19    1.35
  15   3 -11   69.11    1.08
  17   3 -11   46.10    0.75
 -16   4 -11    1.11    0.20
 -14   4 -11   11.49    0.22
 -12   4 -11    6.97    0.16
 -10   4 -11    0.26    0.08
  -8   4 -11   17.89    0.25
  -6   4 -11   78.51    0.96
  -4   4 -11   28.03    0.36
  -2   4 -11    1.11    0.07
   0   4 -11   41.18    0.62
   2   4 -11    4.41    0.09
   4   4 -11    0.87    0.06
   6   4 -11    2.16    0.12
   8   4 -11    9.05    0.20
  10   4 -11   15.25    0.29
  12   4 -11    0.75    0.12
  14   4 -11   10.15    0.26
  16   4 -11    3.87    0.19
  18   4 -11    6.36    0.23
 -17   5 -11   13.78    0.46
 -15   5 -11    1.57    0.14
 -13   5 -11    1.77    0.11
 -11   5 -11    1.89    0.12
  -9   5 -11   65.48    0.81
  -7   5 -11   66.52    0.83
  -5   5 -11  284.62    3.41
  -3   5 -11  259.86    3.11
  -1   5 -11   53.56    0.66
   1   5 -11  101.22    1.47
   3   5 -11   40.58    0.51
   5   5 -11    0.36    0.08
   7   5 -11    4.09    0.15
   9   5 -11   28.54    0.48
  11   5 -11   93.96    1.44
  13   5 -11   62.02    0.98
  15   5 -11   37.13    0.53
  17   5 -11   27.06    0.42
 -16   6 -11    0.07    0.14
 -14   6 -11    0.11    0.12
 -12   6 -11    2.76    0.17
 -10   6 -11   36.20    0.48
  -8   6 -11   74.57    0.93
  -6   6 -11   38.55    0.49
  -4   6 -11   71.07    0.87
  -2   6 -11   48.38    0.60
   0   6 -11   28.29    0.36
   2   6 -11   13.62    0.24
   4   6 -11    7.27    0.16
   6   6 -11    1.91    0.10
   8   6 -11    5.58    0.14
  10   6 -11    0.02    0.09
  12   6 -11   54.45    0.72
  14   6 -11    7.90    0.21
  16   6 -11   13.80    0.28
 -15   7 -11    4.67    0.22
 -13   7 -11    8.04    0.23
 -11   7 -11    1.23    0.13
  -9   7 -11   50.01    0.77
  -7   7 -11  143.12    2.16
  -5   7 -11  247.45    2.97
  -3   7 -11   90.13    1.37
  -1   7 -11  162.75    2.51
   1   7 -11   70.99    0.91
   3   7 -11   12.58    0.23
   5   7 -11    0.26    0.08
   7   7 -11    2.39    0.12
   9   7 -11    1.83    0.12
  11   7 -11   36.40    0.51
  13   7 -11   36.12    0.51
  15   7 -11   45.02    0.62
  17   7 -11   30.52    0.47
 -16   8 -11    0.25    0.22
 -14   8 -11    0.03    0.13
 -12   8 -11   18.66    0.35
 -10   8 -11   15.46    0.31
  -8   8 -11   46.55    0.73
  -6   8 -11    9.99    0.22
  -4   8 -11   16.53    0.30
  -2   8 -11   24.38    0.41
   0   8 -11    6.20    0.16
   2   8 -11   50.01    0.64
   4   8 -11    0.11    0.07
   6   8 -11    2.86    0.12
   8   8 -11    3.28    0.13
  10   8 -11   12.77    0.23
  12   8 -11   13.63    0.25
  14   8 -11    7.08    0.21
  16   8 -11   13.47    0.28
 -15   9 -11    0.33    0.22
 -13   9 -11    0.14    0.13
 -11   9 -11    0.27    0.12
  -9   9 -11   77.76    1.18
  -7   9 -11    3.68    0.16
  -5   9 -11   48.93    0.77
  -3   9 -11   53.25    0.83
  -1   9 -11   23.48    0.40
   1   9 -11    4.18    0.11
   3   9 -11   42.49    0.55
   5   9 -11    0.22    0.08
   7   9 -11   16.45    0.26
   9   9 -11    0.96    0.10
  11   9 -11    8.84    0.20
  13   9 -11   26.34    0.40
  15   9 -11   23.68    0.38
 -14  10 -11    0.33    0.22
 -12  10 -11    1.33    0.14
 -10  10 -11   21.42    0.39
  -8  10 -11   83.21    1.27
  -6  10 -11   10.91    0.24
  -4  10 -11   57.96    0.91
  -2  10 -11   77.44    1.20
   0  10 -11   23.33    0.40
   2  10 -11   67.95    0.87
   4  10 -11    6.78    0.15
   6  10 -11    6.16    0.15
   8  10 -11   16.20    0.26
  10  10 -11   13.41    0.25
  12  10 -11   23.80    0.37
  14  10 -11    6.41    0.21
 -13  11 -11    0.20    0.22
 -11  11 -11    8.05    0.36
  -9  11 -11    9.36    0.24
  -7  11 -11   11.44    0.26
  -5  11 -11   42.02    0.68
  -3  11 -11   45.81    0.74
  -1  11 -11   15.76    0.30
   1  11 -11    3.09    0.16
   3  11 -11    0.94    0.09
   5  11 -11    0.26    0.09
   7  11 -11    2.67    0.14
   9  11 -11    4.67    0.16
  11  11 -11   11.95    0.24
  13  11 -11   17.94    0.31
  15  11 -11   19.64    0.35
 -14  12 -11    0.70    0.25
 -12  12 -11    6.60    0.37
 -10  12 -11   17.07    0.52
  -8  12 -11   19.45    0.37
  -6  12 -11   16.49    0.32
  -4  12 -11   18.01    0.34
  -2  12 -11   77.00    1.20
   0  12 -11   72.29    1.13
   2  12 -11   58.25    0.91
   4  12 -11    2.08    0.13
   6  12 -11    8.71    0.19
   8  12 -11    0.75    0.11
  10  12 -11    2.22    0.16
  12  12 -11   18.30    0.32
  14  12 -11    5.59    0.21
 -13  13 -11    0.43    0.25
 -11  13 -11    2.90    0.34
  -9  13 -11    2.57    0.30
  -7  13 -11   35.62    0.60
  -5  13 -11    0.60    0.12
  -3  13 -11    1.70    0.14
  -1  13 -11   19.39    0.37
   1  13 -11   12.83    0.28
   3  13 -11    2.38    0.18
   5  13 -11    6.54    0.17
   7  13 -11    1.74    0.13
   9  13 -11    6.02    0.19
  11  13 -11    1.86    0.14
  13  13 -11    6.04    0.22
 -12  14 -11    3.17    0.36
 -10  14 -11    7.16    0.38
  -8  14 -11   15.58    0.49
  -6  14 -11   42.91    0.71
  -4  14 -11   18.01    0.35
  -2  14 -11   52.92    0.84
   0  14 -11   26.23    0.46
   2  14 -11   56.17    0.90
   4  14 -11    0.56    0.13
   6  14 -11    0.74    0.14
   8  14 -11   12.12    0.25
  10  14 -11    2.01    0.15
  12  14 -11   32.25    0.48
 -11  15 -11    5.65    0.40
  -9  15 -11    4.06    0.34
  -7  15 -11    1.83    0.23
  -5  15 -11    7.54    0.23
  -3  15 -11    3.60    0.19
  -1  15 -11    2.64    0.18
   1  15 -11    4.72    0.21
   3  15 -11   14.54    0.32
   5  15 -11    3.04    0.21
   7  15 -11    0.22    0.14
   9  15 -11    2.63    0.18
  11  15 -11    2.36    0.17
  -8  16 -11   10.15    0.42
  -6  16 -11   15.58    0.49
  -4  16 -11   31.12    0.55
  -2  16 -11   17.75    0.36
   0  16 -11   20.76    0.39
   2  16 -11   16.13    0.34
   4  16 -11    0.78    0.15
   6  16 -11    1.11    0.16
   8  16 -11    5.46    0.25
  10  16 -11    0.13    0.13
  -7  17 -11    0.27    0.23
  -5  17 -11    0.11    0.22
  -3  17 -11    9.27    0.39
  -1  17 -11    5.98    0.23
   1  17 -11    0.21    0.14
   3  17 -11    0.85    0.15
   5  17 -11    2.66    0.22
   7  17 -11    0.19    0.16
  -6  18 -11    7.44    0.40
  -4  18 -11   17.24    0.54
  -2  18 -11   23.06    0.64
   0  18 -11    7.61    0.26
   2  18 -11    7.06    0.26
   4  18 -11    2.50    0.23
   6  18 -11    0.30    0.16
  -1  19 -11    0.04    0.23
   1  19 -11    1.45    0.17
   3  19 -11    0.54    0.24
  -3 -19 -10   44.75    1.03
  -1 -19 -10   13.97    0.50
   1 -19 -10   10.42    0.45
   3 -19 -10   24.80    0.67
  -6 -18 -10    0.06    0.25
  -4 -18 -10   -0.38    0.23
  -2 -18 -10    4.25    0.37
   0 -18 -10   -0.07    0.24
   2 -18 -10   10.59    0.43
   4 -18 -10    0.00    0.23
   6 -18 -10   -0.02    0.24
  -7 -17 -10    2.65    0.27
  -5 -17 -10   34.48    0.84
  -3 -17 -10   21.07    0.58
  -1 -17 -10    7.74    0.38
   1 -17 -10    5.36    0.34
   3 -17 -10   15.30    0.49
   5 -17 -10    3.13    0.32
   7 -17 -10    0.30    0.16
   9 -17 -10    0.12    0.16
 -10 -16 -10   -0.19    0.23
  -8 -16 -10    0.76    0.23
  -6 -16 -10    0.19    0.22
  -4 -16 -10    7.33    0.36
  -2 -16 -10   11.22    0.42
   0 -16 -10    6.56    0.34
   2 -16 -10    6.71    0.34
   4 -16 -10    0.61    0.22
   6 -16 -10    2.99    0.21
   8 -16 -10    0.18    0.15
  10 -16 -10    0.11    0.16
 -11 -15 -10    1.68    0.25
  -9 -15 -10    7.31    0.35
  -7 -15 -10    7.19    0.35
  -5 -15 -10   23.64    0.62
  -3 -15 -10   42.20    0.94
  -1 -15 -10   61.02    1.33
   1 -15 -10   32.31    0.78
   3 -15 -10   44.23    1.00
   5 -15 -10   10.70    0.27
   7 -15 -10    0.31    0.14
   9 -15 -10    0.97    0.16
  11 -15 -10    1.36    0.17
 -12 -14 -10    0.70    0.22
 -10 -14 -10    0.29    0.21
  -8 -14 -10    5.24    0.31
  -6 -14 -10    3.18    0.28
  -4 -14 -10    7.47    0.33
  -2 -14 -10   10.22    0.38
   0 -14 -10   31.02    0.74
   2 -14 -10   13.85    0.42
   4 -14 -10    0.79    0.12
   6 -14 -10    6.99    0.23
   8 -14 -10    0.48    0.14
  10 -14 -10    0.27    0.15
  12 -14 -10    4.49    0.24
 -13 -13 -10    0.03    0.22
 -11 -13 -10    3.30    0.29
  -9 -13 -10    4.83    0.30
  -7 -13 -10    8.37    0.34
  -5 -13 -10   16.49    0.46
  -3 -13 -10   18.33    0.50
  -1 -13 -10   41.85    0.93
   1 -13 -10   19.64    0.52
   3 -13 -10   26.11    0.44
   5 -13 -10   13.86    0.29
   7 -13 -10   14.54    0.30
   9 -13 -10    2.87    0.20
  11 -13 -10    4.05    0.22
  13 -13 -10    0.85    0.17
 -14 -12 -10    0.37    0.22
 -12 -12 -10    0.19    0.20
 -10 -12 -10    0.39    0.19
  -8 -12 -10    1.69    0.20
  -6 -12 -10   24.24    0.60
  -4 -12 -10   15.14    0.43
  -2 -12 -10   56.87    1.22
   0 -12 -10   50.41    1.11
   2 -12 -10   19.55    0.34
   4 -12 -10    0.30    0.11
   6 -12 -10    0.43    0.12
   8 -12 -10    1.32    0.13
  10 -12 -10    1.95    0.17
  12 -12 -10    3.06    0.21
  14 -12 -10    3.13    0.29
 -13 -11 -10    0.42    0.20
 -11 -11 -10    0.08    0.18
  -9 -11 -10   14.40    0.42
  -7 -11 -10    0.54    0.16
  -5 -11 -10   17.38    0.46
  -3 -11 -10   44.36    0.98
  -1 -11 -10   75.47    1.60
   1 -11 -10  110.04    1.63
   3 -11 -10   52.00    0.80
   5 -11 -10    0.68    0.11
   7 -11 -10    0.46    0.11
   9 -11 -10    0.06    0.12
  11 -11 -10    8.90    0.25
  13 -11 -10    0.50    0.14
  15 -11 -10    0.81    0.27
 -14 -10 -10    7.36    0.34
 -12 -10 -10    0.14    0.18
 -10 -10 -10   15.70    0.43
  -8 -10 -10    8.77    0.31
  -6 -10 -10   23.83    0.58
  -4 -10 -10  181.46    3.71
  -2 -10 -10   60.76    1.30
   0 -10 -10   40.16    0.62
   2 -10 -10   33.71    0.53
   4 -10 -10  105.13    1.56
   6 -10 -10    4.02    0.16
   8 -10 -10    0.03    0.11
  10 -10 -10    9.73    0.24
  12 -10 -10   11.69    0.28
 -15  -9 -10    0.21    0.21
 -13  -9 -10    0.50    0.19
 -11  -9 -10    3.03    0.26
  -9  -9 -10   14.75    0.41
  -7  -9 -10   11.60    0.35
  -5  -9 -10   12.89    0.25
  -3  -9 -10  113.44    1.69
  -1  -9 -10   62.12    0.76
   1  -9 -10   32.83    0.41
   3  -9 -10   73.37    0.90
   5  -9 -10    0.25    0.09
   7  -9 -10    2.95    0.15
   9  -9 -10    7.72    0.21
  11  -9 -10    1.43    0.13
  13  -9 -10    1.12    0.14
  15  -9 -10    1.02    0.26
 -16  -8 -10   24.19    0.61
 -14  -8 -10    8.14    0.33
 -12  -8 -10    1.38    0.19
 -10  -8 -10   29.79    0.69
  -8  -8 -10   32.62    0.53
  -6  -8 -10   27.51    0.45
  -4  -8 -10   98.00    1.46
  -2  -8 -10   34.39    0.43
   0  -8 -10   60.46    0.74
   2  -8 -10   23.27    0.31
   4  -8 -10   85.40    1.04
   6  -8 -10   14.90    0.27
   8  -8 -10   27.07    0.44
  10  -8 -10   15.05    0.29
  12  -8 -10    0.95    0.12
 -15  -7 -10    0.92    0.21
 -13  -7 -10    0.12    0.17
 -11  -7 -10   11.30    0.35
  -9  -7 -10    0.11    0.10
  -7  -7 -10   11.49    0.23
  -5  -7 -10   41.96    0.66
  -3  -7 -10   76.61    1.15
  -1  -7 -10   16.12    0.22
   1  -7 -10   44.84    0.55
   3  -7 -10    4.60    0.09
   5  -7 -10    0.39    0.04
   7  -7 -10    1.02    0.10
   9  -7 -10    1.90    0.14
  11  -7 -10    8.58    0.27
  13  -7 -10    5.57    0.34
  15  -7 -10   10.07    0.45
 -16  -6 -10   31.73    0.74
 -14  -6 -10    6.78    0.31
 -12  -6 -10   28.89    0.67
 -10  -6 -10    5.42    0.18
  -8  -6 -10    4.28    0.15
  -6  -6 -10  138.79    2.06
  -4  -6 -10  365.44    5.35
  -2  -6 -10  150.33    1.82
   0  -6 -10  153.65    1.82
   2  -6 -10   61.47    0.75
   4  -6 -10  156.20    1.88
   6  -6 -10   19.89    0.27
   8  -6 -10   65.59    0.96
  10  -6 -10   67.17    1.00
  12  -6 -10    4.63    0.18
 -17  -5 -10    1.52    0.22
 -15  -5 -10    0.15    0.18
 -13  -5 -10   22.95    0.57
 -11  -5 -10   22.39    0.39
  -9  -5 -10    0.21    0.09
  -7  -5 -10    9.51    0.20
  -5  -5 -10   61.54    0.94
  -3  -5 -10  113.03    1.37
  -1  -5 -10   10.44    0.15
   1  -5 -10   10.87    0.16
   3  -5 -10   19.21    0.25
   5  -5 -10    6.23    0.12
   7  -5 -10    9.01    0.14
   9  -5 -10    0.39    0.09
  11  -5 -10    2.69    0.14
  13  -5 -10    0.22    0.20
  15  -5 -10    4.27    0.35
 -16  -4 -10   32.84    0.77
 -14  -4 -10    1.69    0.19
 -12  -4 -10   20.61    0.37
 -10  -4 -10   59.73    0.92
  -8  -4 -10   24.16    0.40
  -6  -4 -10   62.59    0.95
  -4  -4 -10  109.83    1.64
  -2  -4 -10  259.22    3.09
   0  -4 -10   17.39    0.23
   2  -4 -10   79.59    0.95
   4  -4 -10  149.25    1.79
   6  -4 -10   10.93    0.16
   8  -4 -10   24.52    0.32
  10  -4 -10    0.33    0.06
  12  -4 -10   21.46    0.56
  14  -4 -10   32.31    0.79
  16  -4 -10   40.68    0.97
  18  -4 -10   35.82    0.90
 -17  -3 -10    9.87    0.37
 -15  -3 -10    6.54    0.30
 -13  -3 -10   18.22    0.35
 -11  -3 -10   11.22    0.24
  -9  -3 -10    5.25    0.16
  -7  -3 -10   12.38    0.21
  -5  -3 -10    0.77    0.05
  -3  -3 -10   10.34    0.15
  -1  -3 -10   63.58    0.77
   1  -3 -10    3.33    0.08
   3  -3 -10    3.43    0.08
   5  -3 -10    8.90    0.14
   7  -3 -10    0.12    0.05
   9  -3 -10    0.97    0.06
  11  -3 -10   13.12    0.26
  13  -3 -10    0.51    0.20
  15  -3 -10    3.18    0.33
  17  -3 -10    2.09    0.28
 -18  -2 -10   31.10    0.73
 -16  -2 -10   17.95    0.49
 -14  -2 -10   13.79    0.29
 -12  -2 -10    0.90    0.11
 -10  -2 -10   21.04    0.36
  -8  -2 -10   39.80    0.59
  -6  -2 -10  246.19    3.23
  -4  -2 -10  130.37    1.56
  -2  -2 -10  348.35    4.20
   0  -2 -10  122.51    1.45
   2  -2 -10  412.91    4.89
   4  -2 -10  150.28    1.77
   6  -2 -10   68.14    0.82
   8  -2 -10    0.88    0.06
  10  -2 -10   17.30    0.31
  12  -2 -10   57.28    0.89
  16  -2 -10   43.16    1.01
 -17  -1 -10    8.58    0.35
 -15  -1 -10    0.42    0.13
 -13  -1 -10    1.23    0.12
 -11  -1 -10    2.15    0.14
  -9  -1 -10    0.05    0.06
  -7  -1 -10   12.71    0.22
  -5  -1 -10   16.45    0.22
  -3  -1 -10    0.76    0.05
  -1  -1 -10    1.44    0.06
   1  -1 -10    3.52    0.08
   3  -1 -10    0.51    0.04
   5  -1 -10   14.63    0.20
   7  -1 -10   10.22    0.15
   9  -1 -10    6.17    0.11
  11  -1 -10    6.00    0.17
  13  -1 -10    0.64    0.11
  15  -1 -10    5.16    0.33
  17  -1 -10    1.44    0.26
 -18   0 -10    8.81    0.36
 -16   0 -10    4.31    0.21
 -14   0 -10    3.59    0.18
 -12   0 -10   12.43    0.26
 -10   0 -10   44.25    0.56
  -8   0 -10   10.40    0.16
  -6   0 -10   72.86    1.06
  -4   0 -10  252.86    4.13
  -2   0 -10  230.23    2.76
   0   0 -10  213.04    2.56
   2   0 -10  181.86    2.18
   4   0 -10   57.26    0.70
   6   0 -10   31.81    0.39
   8   0 -10    3.82    0.12
  10   0 -10   28.85    0.47
  12   0 -10   41.88    0.67
  14   0 -10   28.97    0.49
 -17   1 -10    8.16    0.34
 -15   1 -10    0.46    0.13
 -13   1 -10    1.35    0.12
 -11   1 -10    2.30    0.11
  -9   1 -10    0.12    0.06
  -7   1 -10   12.85    0.19
  -5   1 -10   16.65    0.23
  -3   1 -10    0.71    0.06
  -1   1 -10    1.18    0.06
   1   1 -10    3.46    0.08
   3   1 -10    0.45    0.04
   5   1 -10   14.50    0.20
   7   1 -10   10.51    0.20
   9   1 -10    6.33    0.16
  11   1 -10    6.03    0.18
  13   1 -10    0.88    0.12
  15   1 -10    4.83    0.21
  17   1 -10    1.44    0.16
 -16   2 -10   17.81    0.36
 -14   2 -10   13.50    0.29
 -12   2 -10    1.18    0.09
 -10   2 -10   21.06    0.29
  -8   2 -10   38.41    0.49
  -6   2 -10  247.78    2.95
  -4   2 -10  129.58    1.56
  -2   2 -10  351.89    5.08
   0   2 -10  119.01    1.45
   2   2 -10  404.76    4.88
   4   2 -10  146.35    1.77
   6   2 -10   68.13    1.03
   8   2 -10    0.93    0.13
  10   2 -10   17.07    0.31
  12   2 -10   56.75    0.89
  14   2 -10   82.14    1.25
  16   2 -10   42.15    0.70
  18   2 -10   68.76    1.48
 -17   3 -10   10.21    0.39
 -15   3 -10    5.87    0.21
 -13   3 -10   18.59    0.28
 -11   3 -10   11.41    0.19
  -9   3 -10    5.37    0.13
  -7   3 -10   12.20    0.19
  -5   3 -10    0.88    0.06
  -3   3 -10   10.19    0.15
  -1   3 -10   63.13    0.93
   1   3 -10    3.10    0.08
   3   3 -10    3.35    0.08
   5   3 -10    9.06    0.13
   7   3 -10    0.06    0.07
   9   3 -10    1.11    0.10
  11   3 -10   13.41    0.27
  13   3 -10    0.18    0.12
  15   3 -10    2.80    0.19
  17   3 -10    2.29    0.20
 -16   4 -10   32.37    0.80
 -14   4 -10    1.26    0.10
 -12   4 -10   20.31    0.30
 -10   4 -10   59.65    0.75
  -8   4 -10   24.11    0.32
  -6   4 -10   62.86    0.77
  -4   4 -10  110.50    1.33
  -2   4 -10  257.35    3.09
   0   4 -10   17.18    0.28
   2   4 -10   77.93    0.95
   4   4 -10  150.64    1.80
   6   4 -10   10.70    0.21
   8   4 -10   25.31    0.42
  10   4 -10    0.53    0.10
  12   4 -10   21.19    0.38
  14   4 -10   32.75    0.55
  16   4 -10   39.90    0.56
  18   4 -10   34.81    0.61
 -17   5 -10    1.50    0.21
 -15   5 -10    0.12    0.12
 -13   5 -10   23.51    0.33
 -11   5 -10   22.43    0.32
  -9   5 -10    0.13    0.07
  -7   5 -10    9.84    0.16
  -5   5 -10   62.20    0.76
  -3   5 -10  114.23    1.38
  -1   5 -10   10.33    0.16
   1   5 -10   11.04    0.14
   3   5 -10   19.37    0.32
   5   5 -10    6.53    0.16
   7   5 -10    8.71    0.20
   9   5 -10    0.33    0.10
  11   5 -10    2.41    0.16
  13   5 -10    0.15    0.10
  15   5 -10    4.45    0.18
  17   5 -10    2.37    0.17
 -16   6 -10   31.19    0.54
 -14   6 -10    7.06    0.22
 -12   6 -10   29.02    0.49
 -10   6 -10    5.44    0.14
  -8   6 -10    4.29    0.12
  -6   6 -10  139.24    1.68
  -4   6 -10  365.01    4.36
  -2   6 -10  153.16    1.83
   0   6 -10  149.64    2.26
   2   6 -10   61.40    0.78
   4   6 -10  158.53    2.40
   6   6 -10   20.39    0.29
   8   6 -10   64.13    0.83
  10   6 -10   65.87    0.85
  12   6 -10    4.44    0.16
  14   6 -10   37.54    0.53
  16   6 -10   42.25    0.59
  18   6 -10   30.64    0.81
 -17   7 -10   14.60    0.48
 -15   7 -10    1.03    0.14
 -13   7 -10   -0.01    0.12
 -11   7 -10   11.08    0.25
  -9   7 -10    0.18    0.10
  -7   7 -10   11.70    0.24
  -5   7 -10   42.10    0.66
  -3   7 -10   76.33    1.16
  -1   7 -10   16.07    0.28
   1   7 -10   45.04    0.58
   3   7 -10    4.55    0.13
   5   7 -10    0.30    0.08
   7   7 -10    0.93    0.08
   9   7 -10    1.73    0.11
  11   7 -10    8.38    0.19
  13   7 -10    6.20    0.22
  15   7 -10   11.05    0.24
  17   7 -10   16.85    0.32
 -16   8 -10   24.13    0.64
 -14   8 -10    7.68    0.23
 -12   8 -10    1.55    0.13
 -10   8 -10   30.52    0.50
  -8   8 -10   32.88    0.54
  -6   8 -10   28.06    0.46
  -4   8 -10   98.39    1.48
  -2   8 -10   33.86    0.55
   0   8 -10   59.83    0.77
   2   8 -10   23.81    0.32
   4   8 -10   87.30    1.33
   6   8 -10   15.02    0.30
   8   8 -10   26.86    0.38
  10   8 -10   15.06    0.25
  12   8 -10    1.20    0.11
  14   8 -10   64.13    0.85
  16   8 -10   14.19    0.28
 -15   9 -10    0.13    0.21
 -13   9 -10    0.26    0.20
 -11   9 -10    2.97    0.18
  -9   9 -10   15.14    0.30
  -7   9 -10   11.89    0.25
  -5   9 -10   12.79    0.25
  -3   9 -10  112.83    1.71
  -1   9 -10   61.17    0.95
   1   9 -10   32.34    0.43
   3   9 -10   74.78    0.94
   5   9 -10    0.22    0.07
   7   9 -10    2.94    0.12
   9   9 -10    7.69    0.17
  11   9 -10    1.62    0.11
  13   9 -10    1.24    0.12
  15   9 -10    2.68    0.22
 -14  10 -10    7.52    0.37
 -12  10 -10    0.12    0.20
 -10  10 -10   15.53    0.31
  -8  10 -10    8.41    0.22
  -6  10 -10   24.25    0.42
  -4  10 -10  179.83    2.71
  -2  10 -10   59.38    0.95
   0  10 -10   39.87    0.64
   2  10 -10   33.42    0.45
   4  10 -10  106.20    1.33
   6  10 -10    3.93    0.13
   8  10 -10    0.28    0.09
  10  10 -10    9.59    0.20
  12  10 -10   11.91    0.24
  14  10 -10   29.31    0.44
  16  10 -10   12.52    0.27
 -15  11 -10    3.62    0.36
 -13  11 -10    0.54    0.22
 -11  11 -10   -0.04    0.20
  -9  11 -10   14.70    0.30
  -7  11 -10    0.50    0.11
  -5  11 -10   17.83    0.33
  -3  11 -10   43.88    0.71
  -1  11 -10   74.51    1.17
   1  11 -10  109.94    1.68
   3  11 -10   52.04    0.68
   5  11 -10    0.69    0.09
   7  11 -10    0.54    0.09
   9  11 -10    0.03    0.10
  11  11 -10    9.07    0.21
  13  11 -10    0.44    0.12
  15  11 -10    1.15    0.14
 -14  12 -10    0.26    0.24
 -12  12 -10    0.22    0.22
 -10  12 -10    0.84    0.21
  -8  12 -10    1.71    0.13
  -6  12 -10   24.67    0.43
  -4  12 -10   15.22    0.30
  -2  12 -10   55.57    0.89
   0  12 -10   51.57    0.81
   2  12 -10   19.46    0.36
   4  12 -10    0.64    0.10
   6  12 -10    0.46    0.09
   8  12 -10    1.56    0.11
  10  12 -10    1.80    0.14
  12  12 -10    2.99    0.18
  14  12 -10    2.85    0.19
 -13  13 -10    0.18    0.24
 -11  13 -10    3.81    0.34
  -9  13 -10    4.46    0.31
  -7  13 -10    8.39    0.23
  -5  13 -10   16.15    0.32
  -3  13 -10   19.13    0.36
  -1  13 -10   41.00    0.67
   1  13 -10   20.54    0.38
   3  13 -10   26.16    0.46
   5  13 -10   14.28    0.24
   7  13 -10   14.53    0.25
   9  13 -10    2.80    0.16
  11  13 -10    4.40    0.18
  13  13 -10    0.73    0.13
 -12  14 -10    0.86    0.24
 -10  14 -10    0.20    0.22
  -8  14 -10    5.19    0.33
  -6  14 -10    3.25    0.18
  -4  14 -10    7.90    0.22
  -2  14 -10   10.63    0.25
   0  14 -10   31.36    0.53
   2  14 -10   13.94    0.30
   4  14 -10    0.68    0.13
   6  14 -10    7.57    0.19
   8  14 -10    0.76    0.12
  10  14 -10    0.04    0.12
  12  14 -10    4.61    0.20
 -11  15 -10    1.33    0.25
  -9  15 -10    7.16    0.38
  -7  15 -10    7.36    0.36
  -5  15 -10   23.86    0.62
  -3  15 -10   40.00    0.67
  -1  15 -10   60.46    0.96
   1  15 -10   32.60    0.56
   3  15 -10   45.17    0.73
   5  15 -10   11.27    0.28
   7  15 -10    0.41    0.12
   9  15 -10    1.09    0.13
  11  15 -10    1.47    0.14
 -10  16 -10   -0.16    0.24
  -8  16 -10    0.87    0.24
  -6  16 -10    0.27    0.21
  -4  16 -10    6.79    0.34
  -2  16 -10   11.25    0.28
   0  16 -10    6.45    0.23
   2  16 -10    7.23    0.24
   4  16 -10    0.81    0.14
   6  16 -10    3.33    0.22
   8  16 -10    0.18    0.12
  10  16 -10    0.06    0.13
  -7  17 -10    1.61    0.25
  -5  17 -10   34.22    0.84
  -3  17 -10   20.32    0.57
  -1  17 -10    7.87    0.24
   1  17 -10    5.83    0.23
   3  17 -10   15.91    0.35
   5  17 -10    3.36    0.22
   7  17 -10    0.00    0.15
   9  17 -10    0.02    0.16
  -6  18 -10    0.26    0.24
  -4  18 -10   -0.11    0.22
  -2  18 -10    4.39    0.33
   0  18 -10    0.11    0.14
   2  18 -10   10.63    0.29
   4  18 -10    0.21    0.15
   6  18 -10    0.08    0.16
  -3  19 -10   40.90    1.02
  -1  19 -10   13.30    0.47
   1  19 -10   10.43    0.30
   3  19 -10   24.38    0.47
  -3 -19  -9    0.52    0.26
  -1 -19  -9    1.46    0.28
   1 -19  -9    1.95    0.27
   3 -19  -9    1.43    0.26
   5 -19  -9   -0.13    0.25
  -6 -18  -9   10.63    0.43
  -4 -18  -9   34.89    0.85
  -2 -18  -9   25.03    0.66
   0 -18  -9   14.52    0.49
   2 -18  -9   28.44    0.75
   4 -18  -9   18.64    0.56
   6 -18  -9   10.95    0.30
   8 -18  -9   12.69    0.45
  -9 -17  -9    0.04    0.23
  -7 -17  -9    0.91    0.24
  -5 -17  -9    2.02    0.25
  -3 -17  -9    4.86    0.34
  -1 -17  -9    2.04    0.25
   1 -17  -9    0.32    0.22
   3 -17  -9   13.61    0.46
   5 -17  -9    0.08    0.14
   7 -17  -9    0.39    0.16
   9 -17  -9    1.11    0.17
 -10 -16  -9    0.09    0.22
  -8 -16  -9    2.78    0.31
  -6 -16  -9   10.22    0.40
  -4 -16  -9   16.65    0.49
  -2 -16  -9   12.72    0.43
   0 -16  -9   69.40    1.51
   2 -16  -9   35.18    0.85
   4 -16  -9    9.96    0.26
   6 -16  -9    8.20    0.25
   8 -16  -9    1.59    0.16
  10 -16  -9    5.92    0.26
 -11 -15  -9    0.07    0.22
  -9 -15  -9    0.16    0.20
  -7 -15  -9    0.09    0.20
  -5 -15  -9    7.73    0.34
  -3 -15  -9   17.61    0.50
  -1 -15  -9   23.29    0.60
   1 -15  -9   19.70    0.54
   3 -15  -9    3.26    0.18
   5 -15  -9    5.93    0.21
   7 -15  -9    1.91    0.15
   9 -15  -9    1.12    0.16
  11 -15  -9    0.53    0.16
 -12 -14  -9    6.03    0.33
 -10 -14  -9    1.46    0.22
  -8 -14  -9    5.25    0.30
  -6 -14  -9    4.29    0.28
  -4 -14  -9   10.96    0.37
  -2 -14  -9   46.84    1.06
   0 -14  -9   41.34    0.94
   2 -14  -9   36.78    0.59
   4 -14  -9   18.58    0.35
   6 -14  -9   39.36    0.64
   8 -14  -9   10.34    0.27
  10 -14  -9    8.76    0.26
  12 -14  -9    1.67    0.17
 -13 -13  -9    0.44    0.22
 -11 -13  -9   -0.07    0.19
  -9 -13  -9   -0.01    0.18
  -7 -13  -9    2.40    0.21
  -5 -13  -9    8.17    0.32
  -3 -13  -9   33.31    0.77
  -1 -13  -9   38.46    0.86
   1 -13  -9   44.91    0.71
   3 -13  -9   16.67    0.31
   5 -13  -9    0.89    0.12
   7 -13  -9    3.14    0.18
   9 -13  -9    1.05    0.14
  11 -13  -9    0.12    0.14
  13 -13  -9    5.05    0.25
 -12 -12  -9    2.85    0.27
 -10 -12  -9    5.51    0.29
  -8 -12  -9    1.40    0.18
  -6 -12  -9    0.51    0.17
  -4 -12  -9   58.28    1.25
  -2 -12  -9    1.08    0.16
   0 -12  -9   33.43    0.53
   2 -12  -9   32.28    0.52
   4 -12  -9    7.38    0.20
   6 -12  -9    7.03    0.20
   8 -12  -9    8.98    0.24
  10 -12  -9    3.56    0.20
  12 -12  -9    2.31    0.19
  14 -12  -9    1.00    0.16
 -13 -11  -9    2.13    0.22
 -11 -11  -9    0.37    0.17
  -9 -11  -9    4.25    0.26
  -7 -11  -9   12.69    0.38
  -5 -11  -9   65.01    1.39
  -3 -11  -9   48.83    1.10
  -1 -11  -9  109.29    1.61
   1 -11  -9  142.24    2.08
   3 -11  -9   61.60    0.92
   5 -11  -9   56.98    0.86
   7 -11  -9    9.15    0.23
   9 -11  -9    0.17    0.12
  11 -11  -9    8.38    0.24
  13 -11  -9    6.77    0.24
 -14 -10  -9    8.71    0.34
 -12 -10  -9    4.67    0.28
 -10 -10  -9   15.06    0.42
  -8 -10  -9    2.88    0.23
  -6 -10  -9   18.36    0.47
  -4 -10  -9   94.29    2.00
  -2 -10  -9   24.83    0.58
   0 -10  -9  147.48    2.18
   2 -10  -9   87.76    1.30
   4 -10  -9   31.86    0.51
   6 -10  -9    0.62    0.10
   8 -10  -9   13.63    0.28
  10 -10  -9   11.25    0.26
  12 -10  -9    3.01    0.19
  14 -10  -9    0.05    0.14
 -15  -9  -9   18.51    0.51
 -13  -9  -9   18.08    0.48
 -11  -9  -9    0.00    0.16
  -9  -9  -9   15.55    0.41
  -7  -9  -9   16.54    0.42
  -5  -9  -9   47.51    1.02
  -3  -9  -9   55.91    0.85
  -1  -9  -9   50.89    0.63
   1  -9  -9   94.33    1.13
   3  -9  -9   96.89    1.42
   5  -9  -9   26.12    0.43
   7  -9  -9   12.49    0.25
   9  -9  -9   11.93    0.25
  11  -9  -9    5.17    0.19
  13  -9  -9   14.19    0.31
 -14  -8  -9    4.82    0.28
 -12  -8  -9    0.34    0.16
 -10  -8  -9   19.68    0.49
  -8  -8  -9   -0.08    0.13
  -6  -8  -9    1.57    0.11
  -4  -8  -9   26.45    0.42
  -2  -8  -9   15.06    0.21
   0  -8  -9  128.39    1.55
   2  -8  -9   46.52    0.58
   4  -8  -9    0.81    0.08
   6  -8  -9    8.01    0.18
   8  -8  -9   16.20    0.29
  10  -8  -9    4.27    0.17
  12  -8  -9   -0.02    0.11
  14  -8  -9    0.59    0.23
 -15  -7  -9   11.71    0.40
 -13  -7  -9   50.47    1.09
 -11  -7  -9    1.78    0.22
  -9  -7  -9    4.25    0.22
  -7  -7  -9    8.55    0.19
  -5  -7  -9   48.28    0.74
  -3  -7  -9   93.55    1.39
  -1  -7  -9   75.61    0.97
   1  -7  -9  140.44    1.68
   3  -7  -9  204.42    2.46
   5  -7  -9   42.74    0.64
   7  -7  -9  112.47    1.63
   9  -7  -9    2.27    0.14
  11  -7  -9   18.33    0.33
  13  -7  -9    2.83    0.22
 -16  -6  -9    9.32    0.35
 -14  -6  -9    2.61    0.25
 -12  -6  -9    4.24    0.25
 -10  -6  -9   10.20    0.23
  -8  -6  -9    5.48    0.16
  -6  -6  -9    0.63    0.08
  -4  -6  -9   46.24    0.72
  -2  -6  -9   25.58    0.32
   0  -6  -9   50.36    0.62
   2  -6  -9  113.08    1.36
   4  -6  -9    3.06    0.07
   6  -6  -9    6.99    0.12
   8  -6  -9    2.01    0.12
  10  -6  -9   13.37    0.26
  12  -6  -9   12.69    0.33
  14  -6  -9    1.48    0.23
  18  -6  -9    1.69    0.31
 -17  -5  -9   28.30    0.67
 -15  -5  -9   17.97    0.48
 -13  -5  -9   45.00    1.00
 -11  -5  -9   29.48    0.49
  -9  -5  -9    8.55    0.20
  -7  -5  -9    1.17    0.10
  -5  -5  -9   13.15    0.24
  -3  -5  -9   65.86    1.00
  -1  -5  -9  100.12    1.20
   1  -5  -9  120.31    1.45
   3  -5  -9  104.58    1.26
   5  -5  -9  144.85    1.75
   7  -5  -9  103.33    1.25
   9  -5  -9    1.53    0.08
  11  -5  -9    6.34    0.17
  13  -5  -9    0.10    0.20
  15  -5  -9    6.45    0.36
 -16  -4  -9    4.16    0.28
 -14  -4  -9   32.36    0.75
 -12  -4  -9    3.13    0.16
 -10  -4  -9    1.53    0.13
  -8  -4  -9    4.57    0.20
  -6  -4  -9   41.30    0.64
  -4  -4  -9   26.02    0.41
  -2  -4  -9   50.82    0.62
   0  -4  -9    6.90    0.11
   2  -4  -9   24.38    0.31
   4  -4  -9   15.54    0.21
   6  -4  -9   12.92    0.18
   8  -4  -9    0.19    0.05
  10  -4  -9    0.45    0.06
  12  -4  -9    1.43    0.19
  14  -4  -9    0.20    0.21
  16  -4  -9    0.50    0.25
  18  -4  -9    0.47    0.29
 -17  -3  -9   43.50    0.97
 -15  -3  -9   92.03    1.90
 -13  -3  -9   65.33    1.00
 -11  -3  -9    2.42    0.14
  -9  -3  -9    0.58    0.12
  -7  -3  -9   20.23    0.42
  -5  -3  -9   75.58    0.91
  -3  -3  -9   59.75    0.72
  -1  -3  -9   83.53    1.00
   1  -3  -9  151.88    1.80
   3  -3  -9  255.36    3.03
   5  -3  -9   49.87    0.61
   7  -3  -9   85.40    1.03
   9  -3  -9   47.10    0.58
  11  -3  -9   11.75    0.18
  13  -3  -9   31.68    0.77
  15  -3  -9   15.54    0.48
  17  -3  -9   24.64    0.67
 -18  -2  -9    3.61    0.30
 -16  -2  -9    1.29    0.19
 -14  -2  -9   12.80    0.28
 -12  -2  -9    0.26    0.10
 -10  -2  -9   18.63    0.33
  -8  -2  -9    5.50    0.12
  -6  -2  -9    1.71    0.06
  -4  -2  -9   12.82    0.17
  -2  -2  -9   16.75    0.22
   0  -2  -9    5.28    0.09
   2  -2  -9   85.50    1.01
   4  -2  -9   24.04    0.42
   6  -2  -9   53.22    0.65
   8  -2  -9    0.28    0.05
  10  -2  -9    1.06    0.08
  12  -2  -9    2.07    0.14
  14  -2  -9    1.07    0.21
  16  -2  -9    0.68    0.22
  18  -2  -9    0.92    0.27
 -17  -1  -9   38.24    0.90
 -15  -1  -9   61.12    0.95
 -13  -1  -9   26.27    0.45
 -11  -1  -9   32.32    0.42
  -9  -1  -9    0.08    0.05
  -7  -1  -9   43.53    0.64
  -5  -1  -9  186.24    2.69
  -3  -1  -9   28.43    0.35
  -1  -1  -9   71.78    0.87
   1  -1  -9  433.06    5.15
   3  -1  -9  209.37    2.50
   5  -1  -9  140.87    1.66
   7  -1  -9  119.93    1.42
   9  -1  -9   51.15    0.62
  11  -1  -9    2.46    0.13
  13  -1  -9   26.25    0.45
  15  -1  -9    0.76    0.12
  17  -1  -9   44.75    1.02
 -18   0  -9   -0.14    0.20
 -16   0  -9    0.18    0.17
 -14   0  -9    0.05    0.11
 -12   0  -9    0.03    0.07
 -10   0  -9    0.01    0.06
  -8   0  -9    0.24    0.05
  -6   0  -9    0.11    0.05
  -4   0  -9    0.03    0.02
  -2   0  -9   -0.06    0.03
   0   0  -9   -0.11    0.03
   2   0  -9    0.08    0.04
   4   0  -9    0.06    0.04
   6   0  -9    0.10    0.04
   8   0  -9    0.04    0.04
  10   0  -9    0.05    0.08
  12   0  -9    0.03    0.09
  14   0  -9    0.05    0.11
  16   0  -9   -0.03    0.13
  18   0  -9    0.05    0.25
 -17   1  -9   38.85    0.90
 -15   1  -9   61.50    0.95
 -13   1  -9   26.74    0.36
 -11   1  -9   31.55    0.43
  -9   1  -9    0.05    0.06
  -7   1  -9   42.52    0.53
  -5   1  -9  185.18    2.22
  -3   1  -9   28.22    0.43
  -1   1  -9   71.09    0.87
   1   1  -9  423.89    5.14
   3   1  -9  207.84    2.50
   5   1  -9  138.60    1.66
   7   1  -9  118.45    1.77
   9   1  -9   50.88    0.78
  11   1  -9    2.37    0.14
  13   1  -9   26.42    0.45
  15   1  -9    0.67    0.13
  17   1  -9   42.79    1.01
 -16   2  -9    1.19    0.14
 -14   2  -9   12.89    0.22
 -12   2  -9    0.09    0.07
 -10   2  -9   18.74    0.26
  -8   2  -9    5.44    0.11
  -6   2  -9    1.80    0.07
  -4   2  -9   12.54    0.18
  -2   2  -9   16.56    0.27
   0   2  -9    5.15    0.09
   2   2  -9   82.14    1.02
   4   2  -9   23.47    0.30
   6   2  -9   53.11    0.81
   8   2  -9    0.33    0.07
  10   2  -9    1.25    0.11
  12   2  -9    2.50    0.15
  14   2  -9    0.72    0.12
  16   2  -9    0.74    0.14
  18   2  -9    0.39    0.15
 -15   3  -9   90.27    1.12
 -13   3  -9   65.00    0.81
 -11   3  -9    2.28    0.11
  -9   3  -9    0.46    0.06
  -7   3  -9   20.11    0.27
  -5   3  -9   75.35    0.92
  -3   3  -9   59.79    0.73
  -1   3  -9   82.94    1.22
   1   3  -9  147.60    1.80
   3   3  -9  251.19    3.03
   5   3  -9   50.02    0.77
   7   3  -9   86.80    1.29
   9   3  -9   46.76    0.73
  11   3  -9   11.34    0.24
  13   3  -9   31.31    0.53
  15   3  -9   14.92    0.32
  17   3  -9   23.89    0.38
  19   3  -9   33.21    0.84
 -16   4  -9    3.82    0.20
 -14   4  -9   32.65    0.44
 -12   4  -9    3.32    0.13
 -10   4  -9    1.63    0.10
  -8   4  -9    4.28    0.11
  -6   4  -9   41.62    0.52
  -4   4  -9   26.45    0.34
  -2   4  -9   51.40    0.63
   0   4  -9    6.86    0.11
   2   4  -9   24.44    0.31
   4   4  -9   15.05    0.27
   6   4  -9   12.89    0.24
   8   4  -9    0.12    0.08
  10   4  -9    0.41    0.09
  12   4  -9    1.68    0.15
  14   4  -9    0.18    0.12
  16   4  -9    0.21    0.11
  18   4  -9    0.18    0.13
 -17   5  -9   25.92    0.48
 -15   5  -9   18.37    0.35
 -13   5  -9   45.59    0.73
 -11   5  -9   30.03    0.40
  -9   5  -9    8.72    0.16
  -7   5  -9    1.01    0.07
  -5   5  -9   12.67    0.19
  -3   5  -9   67.98    0.82
  -1   5  -9  100.18    1.26
   1   5  -9  120.22    1.35
   3   5  -9  105.86    2.19
   5   5  -9  145.20    2.18
   7   5  -9  103.15    1.56
   9   5  -9    1.47    0.11
  11   5  -9    6.43    0.19
  13   5  -9    0.19    0.09
  15   5  -9    6.18    0.19
  17   5  -9   27.72    0.43
 -16   6  -9    8.91    0.25
 -14   6  -9    2.42    0.17
 -12   6  -9    4.64    0.18
 -10   6  -9    9.93    0.22
  -8   6  -9    5.74    0.13
  -6   6  -9    0.53    0.06
  -4   6  -9   47.42    0.58
  -2   6  -9   25.71    0.33
   0   6  -9   50.64    0.64
   2   6  -9  111.47    1.41
   4   6  -9    2.77    0.10
   6   6  -9    6.94    0.14
   8   6  -9    1.97    0.10
  10   6  -9   13.44    0.22
  12   6  -9   12.23    0.22
  14   6  -9    2.17    0.14
  16   6  -9    4.30    0.19
  18   6  -9    2.63    0.22
 -17   7  -9   43.15    1.01
 -15   7  -9   12.69    0.30
 -13   7  -9   50.26    0.80
 -11   7  -9    1.79    0.15
  -9   7  -9    4.29    0.16
  -7   7  -9    8.81    0.19
  -5   7  -9   48.62    0.75
  -3   7  -9   94.16    1.41
  -1   7  -9   76.07    1.15
   1   7  -9  139.94    1.74
   3   7  -9  206.00    2.55
   5   7  -9   42.14    0.67
   7   7  -9  112.27    1.49
   9   7  -9    2.25    0.12
  11   7  -9   17.80    0.28
  13   7  -9    2.93    0.15
  15   7  -9   24.62    0.38
  17   7  -9   18.40    0.33
 -16   8  -9    2.86    0.32
 -14   8  -9    4.73    0.31
 -12   8  -9    0.28    0.11
 -10   8  -9   20.10    0.36
  -8   8  -9    0.16    0.09
  -6   8  -9    1.58    0.12
  -4   8  -9   26.74    0.43
  -2   8  -9   15.13    0.27
   0   8  -9  128.97    1.60
   2   8  -9   46.67    0.60
   4   8  -9    0.51    0.07
   6   8  -9    7.74    0.18
   8   8  -9   16.05    0.25
  10   8  -9    4.39    0.17
  12   8  -9    0.12    0.10
  14   8  -9    0.92    0.12
  16   8  -9    6.95    0.21
 -15   9  -9   19.09    0.54
 -13   9  -9   18.43    0.51
 -11   9  -9    0.38    0.11
  -9   9  -9   15.34    0.30
  -7   9  -9   16.31    0.30
  -5   9  -9   47.65    0.74
  -3   9  -9   55.83    0.86
  -1   9  -9   50.13    0.65
   1   9  -9   93.19    1.17
   3   9  -9   96.82    1.22
   5   9  -9   27.03    0.37
   7   9  -9   12.06    0.21
   9   9  -9   11.69    0.21
  11   9  -9    5.28    0.16
  13   9  -9   14.53    0.26
  15   9  -9   12.26    0.25
  17   9  -9   12.58    0.49
 -16  10  -9    5.34    0.36
 -14  10  -9    8.50    0.38
 -12  10  -9    4.94    0.31
 -10  10  -9   15.05    0.30
  -8  10  -9    3.10    0.15
  -6  10  -9   18.63    0.33
  -4  10  -9   96.44    1.46
  -2  10  -9   24.67    0.42
   0  10  -9  149.25    1.86
   2  10  -9   87.82    1.11
   4  10  -9   32.34    0.44
   6  10  -9    0.35    0.08
   8  10  -9   13.97    0.23
  10  10  -9   11.49    0.22
  12  10  -9    3.06    0.16
  14  10  -9    0.08    0.12
  16  10  -9    6.88    0.22
 -15  11  -9    6.03    0.37
 -13  11  -9    1.78    0.24
 -11  11  -9    0.64    0.20
  -9  11  -9    4.26    0.18
  -7  11  -9   13.24    0.27
  -5  11  -9   65.38    1.01
  -3  11  -9   50.58    0.80
  -1  11  -9  106.99    1.65
   1  11  -9  143.22    1.78
   3  11  -9   61.06    0.79
   5  11  -9   56.97    0.74
   7  11  -9    9.55    0.19
   9  11  -9    0.38    0.10
  11  11  -9    8.18    0.20
  13  11  -9    6.92    0.20
  15  11  -9    5.05    0.21
 -14  12  -9   10.97    0.44
 -12  12  -9    2.57    0.32
 -10  12  -9    5.41    0.31
  -8  12  -9    1.02    0.12
  -6  12  -9    0.39    0.10
  -4  12  -9   58.08    0.91
  -2  12  -9    1.01    0.10
   0  12  -9   32.66    0.55
   2  12  -9   32.77    0.44
   4  12  -9    7.51    0.16
   6  12  -9    7.33    0.17
   8  12  -9    9.30    0.19
  10  12  -9    3.63    0.16
  12  12  -9    2.29    0.15
  14  12  -9    1.22    0.14
 -13  13  -9    0.11    0.23
 -11  13  -9    0.15    0.21
  -9  13  -9    0.17    0.20
  -7  13  -9    2.15    0.17
  -5  13  -9    8.48    0.22
  -3  13  -9   33.27    0.55
  -1  13  -9   37.48    0.62
   1  13  -9   45.99    0.73
   3  13  -9   16.92    0.26
   5  13  -9    0.82    0.10
   7  13  -9    3.35    0.15
   9  13  -9    1.21    0.11
  11  13  -9   -0.05    0.12
  13  13  -9    4.70    0.20
 -12  14  -9    6.23    0.39
 -10  14  -9    1.56    0.24
  -8  14  -9    5.13    0.31
  -6  14  -9    3.54    0.27
  -4  14  -9   10.28    0.25
  -2  14  -9   47.66    0.76
   0  14  -9   41.81    0.68
   2  14  -9   37.54    0.62
   4  14  -9   19.38    0.30
   6  14  -9   39.89    0.54
   8  14  -9   10.46    0.22
  10  14  -9    8.84    0.22
  12  14  -9    2.17    0.16
 -11  15  -9    0.15    0.24
  -9  15  -9    0.09    0.22
  -7  15  -9   -0.13    0.20
  -5  15  -9    7.84    0.33
  -3  15  -9   17.63    0.35
  -1  15  -9   23.95    0.42
   1  15  -9   20.49    0.39
   3  15  -9    3.57    0.19
   5  15  -9    5.90    0.18
   7  15  -9    1.81    0.13
   9  15  -9    0.92    0.12
  11  15  -9    0.48    0.13
 -10  16  -9   -0.11    0.24
  -8  16  -9    2.96    0.33
  -6  16  -9   10.40    0.40
  -4  16  -9   16.26    0.48
  -2  16  -9   12.57    0.28
   0  16  -9   68.99    1.09
   2  16  -9   36.96    0.61
   4  16  -9   10.95    0.27
   6  16  -9    8.68    0.21
   8  16  -9    1.52    0.13
  10  16  -9    6.04    0.21
  -9  17  -9    0.07    0.24
  -7  17  -9    0.81    0.23
  -5  17  -9    2.22    0.24
  -3  17  -9    4.32    0.31
  -1  17  -9    2.58    0.19
   1  17  -9    0.48    0.13
   3  17  -9   13.70    0.32
   5  17  -9    0.30    0.14
   7  17  -9    0.51    0.15
   9  17  -9    1.21    0.14
  -6  18  -9   10.27    0.43
  -4  18  -9   33.89    0.85
  -2  18  -9   23.07    0.64
   0  18  -9   14.26    0.32
   2  18  -9   30.54    0.54
   4  18  -9   19.70    0.39
   6  18  -9   11.42    0.31
   8  18  -9   12.40    0.32
  -5  19  -9    1.63    0.26
  -3  19  -9    0.45    0.23
  -1  19  -9    1.78    0.24
   1  19  -9    2.42    0.30
   3  19  -9    2.47    0.22
   5  19  -9   -0.02    0.16
  -5 -19  -8    3.81    0.35
  -3 -19  -8   23.20    0.65
  -1 -19  -8   17.05    0.54
   1 -19  -8   24.70    0.66
   3 -19  -8   22.84    0.64
   5 -19  -8    8.39    0.42
  -8 -18  -8    0.24    0.25
  -6 -18  -8   -0.02    0.23
  -4 -18  -8    4.87    0.35
  -2 -18  -8    3.69    0.34
   0 -18  -8    0.30    0.23
   2 -18  -8    5.99    0.36
   4 -18  -8   -0.02    0.22
   6 -18  -8    3.33    0.34
   8 -18  -8    0.47    0.17
  -9 -17  -8    7.96    0.37
  -7 -17  -8    0.58    0.23
  -5 -17  -8    9.52    0.39
  -3 -17  -8    7.40    0.36
  -1 -17  -8   24.25    0.64
   1 -17  -8   46.82    1.06
   3 -17  -8   37.81    0.90
   5 -17  -8   31.63    0.80
   7 -17  -8   24.75    0.47
   9 -17  -8    7.26    0.27
 -10 -16  -8    4.07    0.32
  -8 -16  -8    3.91    0.31
  -6 -16  -8    1.18    0.22
  -4 -16  -8    2.98    0.29
  -2 -16  -8    0.32    0.20
   0 -16  -8    4.53    0.30
   2 -16  -8    6.16    0.32
   4 -16  -8    4.18    0.31
   6 -16  -8    3.90    0.32
   8 -16  -8    2.01    0.17
  10 -16  -8    1.61    0.17
 -11 -15  -8    5.51    0.33
  -9 -15  -8    0.58    0.20
  -7 -15  -8    1.94    0.22
  -5 -15  -8    3.69    0.28
  -3 -15  -8    7.73    0.33
  -1 -15  -8   65.76    1.41
   1 -15  -8   41.61    0.94
   3 -15  -8   33.68    0.81
   5 -15  -8   19.37    0.53
   7 -15  -8   24.51    0.44
   9 -15  -8    5.12    0.23
  11 -15  -8    1.82    0.17
 -12 -14  -8    1.38    0.21
 -10 -14  -8    0.85    0.20
  -8 -14  -8   -0.07    0.18
  -6 -14  -8   -0.12    0.18
  -4 -14  -8   19.87    0.52
  -2 -14  -8   32.42    0.76
   0 -14  -8   10.80    0.36
   2 -14  -8    6.97    0.30
   4 -14  -8   16.04    0.46
   6 -14  -8    1.31    0.13
   8 -14  -8    0.40    0.13
  10 -14  -8   18.38    0.37
  12 -14  -8    0.23    0.15
 -11 -13  -8   14.85    0.44
  -9 -13  -8    4.83    0.27
  -7 -13  -8    5.06    0.27
  -5 -13  -8   54.83    1.20
  -3 -13  -8   16.44    0.45
  -1 -13  -8   38.38    0.87
   1 -13  -8    1.75    0.22
   3 -13  -8   45.87    1.03
   5 -13  -8   11.60    0.37
   7 -13  -8   30.20    0.51
   9 -13  -8    9.14    0.25
  11 -13  -8    5.02    0.22
  13 -13  -8    5.87    0.25
 -12 -12  -8    7.26    0.32
 -10 -12  -8    2.08    0.25
  -8 -12  -8   22.20    0.56
  -6 -12  -8    5.72    0.26
  -4 -12  -8    0.36    0.15
  -2 -12  -8   24.00    0.56
   0 -12  -8   34.41    0.77
   2 -12  -8   71.34    1.56
   4 -12  -8   69.69    1.49
   6 -12  -8   49.52    0.75
   8 -12  -8   15.64    0.31
  10 -12  -8    5.43    0.21
  12 -12  -8    2.68    0.21
  14 -12  -8    0.50    0.16
 -13 -11  -8    5.36    0.30
 -11 -11  -8    8.71    0.32
  -9 -11  -8    0.26    0.16
  -7 -11  -8   24.27    0.59
  -5 -11  -8   51.40    1.13
  -3 -11  -8   71.09    1.51
  -1 -11  -8   34.96    0.54
   1 -11  -8   15.42    0.40
   3 -11  -8   75.87    1.14
   5 -11  -8   29.53    0.48
   7 -11  -8    2.06    0.15
   9 -11  -8   24.43    0.42
  11 -11  -8    7.41    0.23
  13 -11  -8    0.25    0.15
  15 -11  -8   29.86    0.54
 -14 -10  -8   13.47    0.41
 -12 -10  -8   24.71    0.59
 -10 -10  -8   10.71    0.34
  -8 -10  -8    1.23    0.16
  -6 -10  -8   14.22    0.39
  -4 -10  -8   22.10    0.52
  -2 -10  -8   25.57    0.41
   0 -10  -8  103.93    1.53
   2 -10  -8   81.44    1.21
   4 -10  -8   57.74    0.86
   6 -10  -8   97.56    1.45
   8 -10  -8   43.66    0.68
  10 -10  -8    0.30    0.12
  12 -10  -8    0.16    0.13
  14 -10  -8    1.24    0.15
  16 -10  -8    0.94    0.27
 -13  -9  -8   19.17    0.50
 -11  -9  -8    7.77    0.29
  -9  -9  -8    9.57    0.31
  -7  -9  -8   21.06    0.51
  -5  -9  -8   23.10    0.55
  -3  -9  -8   15.00    0.38
  -1  -9  -8   43.93    0.66
   1  -9  -8   41.02    0.62
   3  -9  -8   28.86    0.46
   5  -9  -8   14.27    0.26
   7  -9  -8   76.18    1.13
   9  -9  -8   32.52    0.52
  11  -9  -8    0.17    0.12
  13  -9  -8   12.67    0.28
 -14  -8  -8   43.79    0.97
 -12  -8  -8   17.19    0.44
 -10  -8  -8    0.49    0.15
  -8  -8  -8    4.72    0.22
  -6  -8  -8    0.02    0.11
  -4  -8  -8   27.07    0.43
  -2  -8  -8   59.68    0.72
   0  -8  -8   93.59    1.13
   2  -8  -8  225.83    2.70
   4  -8  -8  114.03    1.65
   6  -8  -8   43.62    0.66
   8  -8  -8  133.58    1.94
  10  -8  -8    3.04    0.16
  12  -8  -8   10.55    0.25
  14  -8  -8    5.89    0.21
  16  -8  -8    0.50    0.25
 -15  -7  -8    8.87    0.33
 -13  -7  -8    5.95    0.27
 -11  -7  -8    3.10    0.22
  -9  -7  -8    1.32    0.15
  -7  -7  -8    8.94    0.19
  -5  -7  -8   26.54    0.43
  -3  -7  -8   27.07    0.42
  -1  -7  -8   62.70    0.76
   1  -7  -8  136.63    1.65
   3  -7  -8   25.18    0.32
   5  -7  -8   36.25    0.55
   7  -7  -8   11.61    0.22
   9  -7  -8    1.28    0.10
  11  -7  -8    0.34    0.10
  13  -7  -8   10.57    0.25
 -16  -6  -8   41.88    0.92
 -14  -6  -8   24.10    0.59
 -12  -6  -8   37.91    0.82
 -10  -6  -8    4.80    0.22
  -8  -6  -8    1.03    0.10
  -6  -6  -8    6.92    0.16
  -4  -6  -8    1.28    0.09
  -2  -6  -8   46.42    0.57
   0  -6  -8   57.82    0.71
   2  -6  -8  335.71    4.36
   4  -6  -8  177.65    2.13
   6  -6  -8  193.30    2.76
   8  -6  -8   36.33    0.56
  10  -6  -8   19.30    0.34
  12  -6  -8    0.07    0.10
  14  -6  -8    0.68    0.21
 -15  -5  -8    0.75    0.18
 -13  -5  -8    2.13    0.22
 -11  -5  -8    0.12    0.13
  -9  -5  -8   27.02    0.44
  -7  -5  -8    4.36    0.13
  -5  -5  -8   58.21    0.88
  -3  -5  -8   26.92    0.42
  -1  -5  -8    2.86    0.06
   1  -5  -8   32.20    0.40
   3  -5  -8  124.40    1.49
   5  -5  -8   85.48    1.03
   7  -5  -8   18.42    0.24
   9  -5  -8   24.70    0.32
  11  -5  -8   -0.05    0.09
  13  -5  -8   13.81    0.44
  15  -5  -8    0.38    0.22
  17  -5  -8    1.13    0.27
 -16  -4  -8   61.97    1.35
 -14  -4  -8   78.51    1.65
 -12  -4  -8   38.02    0.83
 -10  -4  -8    8.08    0.19
  -8  -4  -8   25.48    0.57
  -6  -4  -8    7.90    0.16
  -4  -4  -8    5.35    0.12
  -2  -4  -8  116.51    1.41
   0  -4  -8   37.32    0.46
   2  -4  -8  477.41    5.72
   4  -4  -8   83.53    1.01
   6  -4  -8   87.50    1.06
   8  -4  -8   16.94    0.23
  10  -4  -8    8.89    0.15
  12  -4  -8    6.69    0.18
  14  -4  -8    0.29    0.20
  16  -4  -8   13.30    0.47
 -17  -3  -8    0.25    0.18
 -15  -3  -8    0.31    0.17
 -13  -3  -8    3.19    0.22
 -11  -3  -8   39.45    0.63
  -9  -3  -8   14.80    0.37
  -7  -3  -8   26.91    0.41
  -5  -3  -8   18.35    0.30
  -3  -3  -8    0.30    0.03
  -1  -3  -8    0.22    0.03
   1  -3  -8   40.95    0.50
   3  -3  -8   19.07    0.24
   5  -3  -8    0.21    0.04
   7  -3  -8    0.46    0.04
   9  -3  -8   10.01    0.15
  11  -3  -8    4.41    0.11
  13  -3  -8    6.15    0.30
  15  -3  -8    4.69    0.32
  17  -3  -8    1.09    0.26
  19  -3  -8   -0.29    0.27
 -16  -2  -8   94.26    1.98
 -14  -2  -8  186.11    3.79
 -12  -2  -8   40.78    0.65
 -10  -2  -8    2.81    0.09
  -8  -2  -8   94.43    1.37
  -6  -2  -8  167.85    2.41
  -4  -2  -8  283.75    3.55
  -2  -2  -8  436.97    5.23
   0  -2  -8   77.99    1.13
   2  -2  -8  526.57    6.24
   4  -2  -8  193.85    2.30
   6  -2  -8  190.84    2.28
   8  -2  -8  102.60    1.22
  10  -2  -8   21.05    0.27
  12  -2  -8   12.20    0.24
  14  -2  -8    3.32    0.16
  16  -2  -8   16.28    0.50
 -17  -1  -8    0.51    0.18
 -15  -1  -8    0.04    0.15
 -13  -1  -8    1.45    0.13
 -11  -1  -8    9.00    0.16
  -9  -1  -8   12.47    0.18
  -7  -1  -8    2.63    0.07
  -5  -1  -8    0.54    0.05
  -3  -1  -8   21.63    0.27
  -1  -1  -8    4.42    0.07
   1  -1  -8    5.31    0.09
   3  -1  -8    0.43    0.04
   5  -1  -8  155.79    1.86
   7  -1  -8    1.12    0.06
   9  -1  -8    1.13    0.06
  11  -1  -8    4.92    0.15
  13  -1  -8    0.89    0.10
  15  -1  -8   -0.14    0.11
  17  -1  -8   -0.01    0.23
  19  -1  -8    0.49    0.26
 -18   0  -8   43.15    0.96
 -16   0  -8   83.89    1.76
 -14   0  -8   59.21    0.91
 -12   0  -8   80.95    1.02
 -10   0  -8   66.72    0.83
  -8   0  -8    6.09    0.11
  -6   0  -8   56.98    0.70
  -4   0  -8    3.20    0.08
  -2   0  -8  121.04    1.44
   0   0  -8  178.41    2.14
   2   0  -8  131.95    1.58
   4   0  -8  354.69    4.25
   6   0  -8  213.40    2.53
   8   0  -8   66.26    0.80
  10   0  -8   31.27    0.49
  12   0  -8    2.42    0.14
  14   0  -8    0.34    0.11
  16   0  -8   14.92    0.34
  18   0  -8   60.10    1.36
 -17   1  -8   -0.10    0.18
 -15   1  -8    0.08    0.11
 -13   1  -8    1.54    0.10
 -11   1  -8    9.52    0.16
  -9   1  -8   12.59    0.19
  -7   1  -8    2.71    0.08
  -5   1  -8    0.42    0.05
  -3   1  -8   21.71    0.33
  -1   1  -8    4.19    0.08
   1   1  -8    5.05    0.09
   3   1  -8    0.35    0.04
   5   1  -8  156.14    1.86
   7   1  -8    1.17    0.09
   9   1  -8    1.03    0.08
  11   1  -8    4.96    0.15
  13   1  -8    0.98    0.11
  15   1  -8   -0.11    0.12
  17   1  -8   -0.06    0.14
  19   1  -8   -0.18    0.25
 -16   2  -8   93.22    1.98
 -14   2  -8  184.98    2.24
 -12   2  -8   41.24    0.53
 -10   2  -8    2.86    0.10
  -8   2  -8   92.73    1.14
  -6   2  -8  165.60    2.00
  -4   2  -8  283.87    3.39
  -2   2  -8  439.07    6.33
   0   2  -8   75.60    0.92
   2   2  -8  513.15    6.24
   4   2  -8  191.58    2.30
   6   2  -8  191.66    2.84
   8   2  -8  101.55    1.52
  10   2  -8   20.73    0.35
  12   2  -8   12.31    0.25
  14   2  -8    3.50    0.17
  16   2  -8   15.89    0.33
  18   2  -8   22.72    0.46
 -15   3  -8    0.11    0.09
 -13   3  -8    2.83    0.12
 -11   3  -8   39.48    0.51
  -9   3  -8   14.91    0.21
  -7   3  -8   26.16    0.34
  -5   3  -8   18.25    0.24
  -3   3  -8    0.36    0.05
  -1   3  -8    0.10    0.04
   1   3  -8   41.32    0.61
   3   3  -8   18.95    0.25
   5   3  -8    0.08    0.06
   7   3  -8    0.58    0.07
   9   3  -8    9.68    0.20
  11   3  -8    4.39    0.15
  13   3  -8    6.48    0.20
  15   3  -8    4.55    0.20
  17   3  -8    1.23    0.14
  19   3  -8   -0.11    0.13
 -16   4  -8   62.86    0.99
 -14   4  -8   79.09    1.21
 -12   4  -8   37.65    0.49
 -10   4  -8    8.29    0.15
  -8   4  -8   25.40    0.33
  -6   4  -8    7.78    0.13
  -4   4  -8    5.28    0.10
  -2   4  -8  117.71    1.41
   0   4  -8   37.17    0.46
   2   4  -8  485.01    6.96
   4   4  -8   82.53    1.26
   6   4  -8   87.24    1.32
   8   4  -8   17.01    0.29
  10   4  -8    8.75    0.20
  12   4  -8    6.77    0.19
  14   4  -8    0.16    0.10
  16   4  -8   13.03    0.25
  18   4  -8   15.46    0.29
 -17   5  -8    8.83    0.37
 -15   5  -8    0.48    0.12
 -13   5  -8    2.11    0.15
 -11   5  -8    0.07    0.07
  -9   5  -8   27.03    0.36
  -7   5  -8    4.44    0.10
  -5   5  -8   58.15    0.72
  -3   5  -8   27.14    0.34
  -1   5  -8    2.65    0.07
   1   5  -8   32.49    0.42
   3   5  -8  124.36    1.90
   5   5  -8   84.21    1.29
   7   5  -8   18.11    0.31
   9   5  -8   24.93    0.41
  11   5  -8   -0.04    0.08
  13   5  -8   14.78    0.25
  15   5  -8    0.46    0.11
  17   5  -8    1.82    0.14
 -18   6  -8   56.21    1.25
 -16   6  -8   41.13    0.95
 -14   6  -8   24.70    0.43
 -12   6  -8   37.47    0.60
 -10   6  -8    4.78    0.16
  -8   6  -8    0.77    0.08
  -6   6  -8    6.95    0.16
  -4   6  -8    1.62    0.09
  -2   6  -8   45.81    0.71
   0   6  -8   58.05    0.73
   2   6  -8  338.41    4.17
   4   6  -8  180.14    2.72
   6   6  -8  188.04    2.36
   8   6  -8   36.08    0.48
  10   6  -8   19.32    0.29
  12   6  -8    0.16    0.09
  14   6  -8    1.47    0.11
  16   6  -8    6.03    0.19
  18   6  -8   19.01    0.34
 -17   7  -8   13.73    0.47
 -15   7  -8    9.03    0.35
 -13   7  -8    5.74    0.19
 -11   7  -8    3.00    0.15
  -9   7  -8    1.32    0.10
  -7   7  -8    8.92    0.19
  -5   7  -8   26.57    0.43
  -3   7  -8   26.59    0.43
  -1   7  -8   61.77    0.95
   1   7  -8  137.92    1.70
   3   7  -8   25.14    0.34
   5   7  -8   35.73    0.57
   7   7  -8   11.47    0.23
   9   7  -8    1.01    0.08
  11   7  -8    0.37    0.09
  13   7  -8   11.05    0.22
  15   7  -8    6.10    0.19
  17   7  -8   11.44    0.26
 -16   8  -8   35.86    0.84
 -14   8  -8   44.22    1.01
 -12   8  -8   16.68    0.32
 -10   8  -8    0.45    0.10
  -8   8  -8    4.94    0.16
  -6   8  -8    0.03    0.08
  -4   8  -8   26.74    0.44
  -2   8  -8   58.44    0.91
   0   8  -8   93.34    1.17
   2   8  -8  226.42    2.79
   4   8  -8  112.45    1.41
   6   8  -8   42.95    0.68
   8   8  -8  132.59    1.66
  10   8  -8    3.05    0.13
  12   8  -8   10.93    0.21
  14   8  -8    5.82    0.18
  16   8  -8    0.96    0.13
 -15   9  -8    6.07    0.34
 -13   9  -8   19.11    0.53
 -11   9  -8    7.70    0.21
  -9   9  -8    9.70    0.22
  -7   9  -8   21.28    0.37
  -5   9  -8   24.37    0.40
  -3   9  -8   15.25    0.27
  -1   9  -8   43.80    0.57
   1   9  -8   41.02    0.53
   3   9  -8   29.32    0.39
   5   9  -8   14.06    0.22
   7   9  -8   75.26    0.96
   9   9  -8   32.38    0.44
  11   9  -8    0.18    0.09
  13   9  -8   12.52    0.24
  15   9  -8   18.67    0.32
  17   9  -8    6.11    0.29
 -16  10  -8   24.90    0.68
 -14  10  -8   12.62    0.45
 -12  10  -8   24.81    0.63
 -10  10  -8   10.90    0.25
  -8  10  -8    1.09    0.10
  -6  10  -8   14.68    0.28
  -4  10  -8   22.46    0.38
  -2  10  -8   25.84    0.35
   0  10  -8  104.28    1.31
   2  10  -8   81.14    1.03
   4  10  -8   57.54    0.74
   6  10  -8   98.51    1.23
   8  10  -8   43.53    0.58
  10  10  -8    0.47    0.09
  12  10  -8    0.03    0.10
  14  10  -8    1.00    0.12
  16  10  -8    1.45    0.18
 -15  11  -8   31.52    0.79
 -13  11  -8    5.47    0.35
 -11  11  -8    8.70    0.35
  -9  11  -8    0.32    0.10
  -7  11  -8   24.69    0.42
  -5  11  -8   52.96    0.83
  -3  11  -8   71.31    1.10
  -1  11  -8   34.75    0.46
   1  11  -8   15.66    0.24
   3  11  -8   77.01    0.97
   5  11  -8   29.25    0.40
   7  11  -8    2.03    0.12
   9  11  -8   24.17    0.35
  11  11  -8    7.27    0.19
  13  11  -8    0.17    0.11
  15  11  -8   29.97    0.58
 -14  12  -8   13.13    0.46
 -12  12  -8    7.47    0.37
 -10  12  -8    1.44    0.21
  -8  12  -8   23.11    0.41
  -6  12  -8    6.03    0.18
  -4  12  -8    0.21    0.09
  -2  12  -8   23.10    0.40
   0  12  -8   34.23    0.46
   2  12  -8   75.21    0.97
   4  12  -8   71.18    0.91
   6  12  -8   48.80    0.64
   8  12  -8   16.10    0.26
  10  12  -8    5.64    0.17
  12  12  -8    2.69    0.17
  14  12  -8    0.19    0.17
 -13  13  -8   10.60    0.44
 -11  13  -8   15.00    0.48
  -9  13  -8    4.60    0.30
  -7  13  -8    4.65    0.28
  -5  13  -8   56.24    0.87
  -3  13  -8   16.24    0.31
  -1  13  -8   38.21    0.63
   1  13  -8    1.78    0.11
   3  13  -8   47.64    0.62
   5  13  -8   12.18    0.22
   7  13  -8   31.03    0.43
   9  13  -8    9.45    0.21
  11  13  -8    4.83    0.18
  13  13  -8    6.05    0.27
 -12  14  -8    1.21    0.25
 -10  14  -8    0.80    0.22
  -8  14  -8    0.04    0.19
  -6  14  -8    0.13    0.18
  -4  14  -8   19.52    0.36
  -2  14  -8   32.62    0.54
   0  14  -8   11.05    0.25
   2  14  -8    7.32    0.17
   4  14  -8   16.79    0.27
   6  14  -8    1.24    0.11
   8  14  -8    0.48    0.11
  10  14  -8   18.43    0.31
  12  14  -8    0.13    0.17
  14  14  -8    0.30    0.26
 -11  15  -8    5.97    0.37
  -9  15  -8    0.84    0.22
  -7  15  -8    2.12    0.28
  -5  15  -8    4.06    0.28
  -3  15  -8    7.97    0.22
  -1  15  -8   65.42    1.02
   1  15  -8   41.09    0.67
   3  15  -8   35.60    0.49
   5  15  -8   19.96    0.31
   7  15  -8   25.29    0.37
   9  15  -8    5.28    0.18
  11  15  -8    1.46    0.18
 -10  16  -8    3.75    0.36
  -8  16  -8    4.05    0.33
  -6  16  -8    0.48    0.20
  -4  16  -8    3.03    0.28
  -2  16  -8    0.52    0.12
   0  16  -8    4.84    0.20
   2  16  -8    6.39    0.22
   4  16  -8    4.93    0.21
   6  16  -8    4.61    0.18
   8  16  -8    1.86    0.14
  10  16  -8    1.58    0.18
  -9  17  -8    8.02    0.41
  -7  17  -8    0.46    0.22
  -5  17  -8    9.66    0.39
  -3  17  -8    7.77    0.34
  -1  17  -8   24.76    0.45
   1  17  -8   46.88    0.76
   3  17  -8   39.20    0.65
   5  17  -8   34.02    0.58
   7  17  -8   25.53    0.39
   9  17  -8    7.52    0.29
  -8  18  -8    0.13    0.24
  -6  18  -8    0.08    0.22
  -4  18  -8    5.25    0.34
  -2  18  -8    3.90    0.31
   0  18  -8    0.34    0.20
   2  18  -8    7.01    0.24
   4  18  -8    0.07    0.14
   6  18  -8    3.41    0.23
   8  18  -8    0.70    0.18
  -5  19  -8    3.28    0.35
  -3  19  -8   23.00    0.64
  -1  19  -8   16.95    0.51
   1  19  -8   23.97    0.65
   3  19  -8   23.63    0.45
   5  19  -8    8.77    0.28
   0  20  -8    7.00    0.36
  -2 -20  -7    5.34    0.38
   0 -20  -7   17.29    0.55
   2 -20  -7   19.14    0.58
  -5 -19  -7    1.07    0.25
  -3 -19  -7    2.42    0.27
  -1 -19  -7    6.29    0.38
   1 -19  -7    0.87    0.24
   3 -19  -7   -0.18    0.24
   5 -19  -7   -0.25    0.24
  -8 -18  -7   13.92    0.47
  -6 -18  -7    0.09    0.22
  -4 -18  -7    0.20    0.23
  -2 -18  -7    1.02    0.24
   0 -18  -7   33.75    0.83
   2 -18  -7   30.81    0.78
   4 -18  -7   23.88    0.65
   6 -18  -7   15.69    0.51
   8 -18  -7   18.11    0.57
  -9 -17  -7    2.27    0.24
  -7 -17  -7    0.42    0.22
  -5 -17  -7    0.22    0.21
  -3 -17  -7    0.75    0.22
  -1 -17  -7    0.12    0.21
   1 -17  -7    1.64    0.22
   3 -17  -7   12.42    0.44
   5 -17  -7    0.18    0.21
   7 -17  -7   12.60    0.45
   9 -17  -7    0.25    0.16
 -10 -16  -7   23.78    0.63
  -8 -16  -7    1.13    0.21
  -6 -16  -7    9.34    0.36
  -4 -16  -7    3.17    0.29
  -2 -16  -7    2.37    0.27
   0 -16  -7   42.19    0.97
   2 -16  -7   17.66    0.51
   4 -16  -7   34.16    0.83
   6 -16  -7   37.61    0.90
   8 -16  -7   18.73    0.54
  10 -16  -7   12.37    0.32
 -11 -15  -7    3.55    0.30
  -9 -15  -7   18.77    0.51
  -7 -15  -7    0.20    0.19
  -5 -15  -7    1.07    0.19
  -3 -15  -7    3.79    0.28
  -1 -15  -7    2.39    0.25
   1 -15  -7    9.09    0.34
   3 -15  -7   11.73    0.39
   5 -15  -7   14.26    0.44
   7 -15  -7   13.03    0.42
   9 -15  -7   17.51    0.36
  11 -15  -7    7.44    0.26
  13 -15  -7    0.33    0.17
 -10 -14  -7   37.09    0.85
  -8 -14  -7    9.12    0.34
  -6 -14  -7   -0.01    0.17
  -4 -14  -7    6.55    0.30
  -2 -14  -7    9.19    0.33
   0 -14  -7   72.52    1.56
   2 -14  -7   31.00    0.74
   4 -14  -7   28.82    0.69
   6 -14  -7   24.98    0.62
   8 -14  -7   57.79    1.28
  10 -14  -7   11.36    0.29
  12 -14  -7    1.89    0.17
  14 -14  -7    1.70    0.19
 -11 -13  -7    5.77    0.30
  -9 -13  -7    8.27    0.31
  -7 -13  -7    0.10    0.17
  -5 -13  -7    0.07    0.16
  -3 -13  -7    0.12    0.16
  -1 -13  -7   19.12    0.49
   1 -13  -7    0.40    0.15
   3 -13  -7   14.25    0.41
   5 -13  -7   34.51    0.80
   7 -13  -7   40.23    0.91
   9 -13  -7   12.68    0.28
  11 -13  -7    9.97    0.27
  13 -13  -7    0.16    0.16
 -12 -12  -7   12.32    0.39
 -10 -12  -7   15.83    0.43
  -8 -12  -7    3.52    0.23
  -6 -12  -7    0.25    0.15
  -4 -12  -7   26.49    0.62
  -2 -12  -7    2.96    0.21
   0 -12  -7   72.72    1.56
   2 -12  -7    3.44    0.22
   4 -12  -7   31.81    0.71
   6 -12  -7    6.54    0.28
   8 -12  -7   18.53    0.35
  10 -12  -7    3.45    0.19
  12 -12  -7    7.04    0.24
  14 -12  -7    2.78    0.24
 -13 -11  -7   40.36    0.91
 -11 -11  -7   29.16    0.67
  -9 -11  -7   20.72    0.50
  -7 -11  -7    0.67    0.15
  -5 -11  -7    0.29    0.14
  -3 -11  -7    3.85    0.21
  -1 -11  -7    9.02    0.28
   1 -11  -7   42.83    0.94
   3 -11  -7   45.13    0.99
   5 -11  -7  107.88    2.21
   7 -11  -7  127.93    1.89
   9 -11  -7   61.53    0.94
  11 -11  -7   24.78    0.44
  13 -11  -7   16.14    0.34
  15 -11  -7    0.14    0.16
 -12 -10  -7   22.99    0.56
 -10 -10  -7    8.35    0.29
  -8 -10  -7    1.92    0.20
  -6 -10  -7    8.26    0.27
  -4 -10  -7   46.22    0.98
  -2 -10  -7    0.37    0.12
   0 -10  -7   41.47    0.91
   2 -10  -7    3.22    0.19
   4 -10  -7   49.69    1.06
   6 -10  -7   44.37    0.67
   8 -10  -7  190.79    2.74
  10 -10  -7   15.75    0.31
  12 -10  -7    6.06    0.21
  14 -10  -7    1.49    0.15
  16 -10  -7    5.26    0.40
 -13  -9  -7   34.91    0.77
 -11  -9  -7   43.52    0.92
  -9  -9  -7   22.15    0.52
  -7  -9  -7   15.94    0.41
  -5  -9  -7    4.29    0.20
  -3  -9  -7   46.50    0.99
  -1  -9  -7   10.59    0.28
   1  -9  -7  175.90    3.65
   3  -9  -7   37.72    0.83
   5  -9  -7   62.44    0.92
   7  -9  -7   39.59    0.61
   9  -9  -7   96.05    1.41
  11  -9  -7    9.62    0.23
  13  -9  -7    6.36    0.22
  15  -9  -7    1.08    0.15
  17  -9  -7    0.14    0.27
 -14  -8  -7   13.17    0.38
 -12  -8  -7   39.46    0.86
 -10  -8  -7    6.22    0.25
  -8  -8  -7    0.17    0.12
  -6  -8  -7   12.92    0.33
  -4  -8  -7    7.34    0.23
  -2  -8  -7    0.52    0.05
   0  -8  -7   70.76    1.04
   2  -8  -7   10.77    0.20
   4  -8  -7    5.98    0.14
   6  -8  -7   61.28    0.90
   8  -8  -7   63.08    0.93
  10  -8  -7    2.11    0.14
  12  -8  -7    9.54    0.23
  14  -8  -7    1.16    0.13
 -15  -7  -7   58.25    1.24
 -13  -7  -7   36.38    0.82
 -11  -7  -7   22.65    0.54
  -9  -7  -7   71.52    1.49
  -7  -7  -7    7.31    0.23
  -5  -7  -7    2.08    0.10
  -3  -7  -7    1.15    0.08
  -1  -7  -7    9.69    0.14
   1  -7  -7  324.57    3.85
   3  -7  -7   39.78    0.49
   5  -7  -7  183.92    2.63
   7  -7  -7  127.86    1.84
   9  -7  -7   45.29    0.69
  11  -7  -7    9.10    0.21
  13  -7  -7   24.89    0.43
  15  -7  -7    0.81    0.23
  17  -7  -7    0.27    0.26
 -14  -6  -7    4.91    0.26
 -12  -6  -7   25.78    0.58
 -10  -6  -7   12.60    0.34
  -8  -6  -7    1.59    0.11
  -6  -6  -7    4.00    0.13
  -4  -6  -7    3.78    0.11
  -2  -6  -7    9.63    0.13
   0  -6  -7    0.29    0.03
   2  -6  -7    6.72    0.10
   4  -6  -7   15.91    0.26
   6  -6  -7   97.33    1.42
   8  -6  -7    1.36    0.11
  10  -6  -7   50.13    0.76
  12  -6  -7    1.02    0.11
  14  -6  -7    2.60    0.30
  16  -6  -7    1.50    0.25
  18  -6  -7    0.95    0.28
 -15  -5  -7   53.73    1.13
 -13  -5  -7   20.71    0.50
 -11  -5  -7   60.82    1.28
  -9  -5  -7    0.42    0.12
  -7  -5  -7    4.56    0.13
  -5  -5  -7   12.77    0.22
  -3  -5  -7   17.39    0.28
  -1  -5  -7    1.15    0.05
   1  -5  -7  707.82    8.40
   3  -5  -7  279.02    3.33
   5  -5  -7  164.73    1.96
   7  -5  -7   55.81    0.68
   9  -5  -7   61.02    0.75
  11  -5  -7    5.74    0.16
  13  -5  -7    1.09    0.11
  17  -5  -7    6.11    0.39
 -16  -4  -7    6.96    0.30
 -14  -4  -7    0.28    0.15
 -12  -4  -7   44.70    0.94
 -10  -4  -7    0.79    0.08
  -8  -4  -7   10.77    0.28
  -6  -4  -7   85.41    1.27
  -4  -4  -7    2.79    0.09
  -2  -4  -7    0.28    0.05
   0  -4  -7   41.05    0.50
   2  -4  -7  144.79    1.75
   4  -4  -7    6.78    0.10
   6  -4  -7    9.22    0.13
   8  -4  -7   17.25    0.23
  10  -4  -7   25.38    0.33
  12  -4  -7   21.05    0.36
  14  -4  -7   10.70    0.38
  16  -4  -7    0.56    0.23
  18  -4  -7    1.88    0.28
 -17  -3  -7   23.87    0.59
 -15  -3  -7   88.95    1.87
 -13  -3  -7  118.75    2.42
 -11  -3  -7   20.45    0.36
  -9  -3  -7   80.29    1.65
  -7  -3  -7   69.28    1.01
  -5  -3  -7   10.51    0.19
  -3  -3  -7   48.44    0.59
  -1  -3  -7   59.46    0.71
   1  -3  -7  380.18    4.58
   3  -3  -7  177.30    2.11
   5  -3  -7   49.12    0.60
   7  -3  -7  192.36    2.29
   9  -3  -7   37.98    0.47
  11  -3  -7   10.68    0.17
  13  -3  -7    3.63    0.15
  15  -3  -7    4.38    0.31
  17  -3  -7   10.03    0.43
  19  -3  -7    2.13    0.30
 -16  -2  -7    0.93    0.17
 -14  -2  -7    0.52    0.15
 -12  -2  -7    0.60    0.09
 -10  -2  -7   10.99    0.22
  -8  -2  -7    4.10    0.09
  -6  -2  -7    8.22    0.15
  -4  -2  -7   11.56    0.16
  -2  -2  -7    4.49    0.07
   0  -2  -7    6.31    0.09
   2  -2  -7    8.13    0.11
   4  -2  -7    0.96    0.05
   6  -2  -7    8.82    0.13
   8  -2  -7   16.75    0.22
  10  -2  -7    6.86    0.12
  12  -2  -7    1.21    0.11
  14  -2  -7    0.23    0.10
  16  -2  -7    0.32    0.23
  18  -2  -7    3.26    0.35
 -17  -1  -7   52.48    1.14
 -15  -1  -7   59.69    1.31
 -13  -1  -7  136.43    2.04
 -11  -1  -7   69.75    0.86
  -9  -1  -7   56.87    0.69
  -7  -1  -7   31.40    0.39
  -5  -1  -7   17.08    0.26
  -3  -1  -7   15.14    0.20
  -1  -1  -7  468.60    5.53
   1  -1  -7  324.91    3.86
   3  -1  -7  131.31    1.55
   5  -1  -7  326.55    3.90
   7  -1  -7  173.75    2.05
   9  -1  -7   45.81    0.55
  11  -1  -7   49.14    0.74
  13  -1  -7    6.90    0.19
  15  -1  -7    3.89    0.18
  17  -1  -7   23.24    0.63
  19  -1  -7    8.21    0.42
 -18   0  -7    0.25    0.19
 -16   0  -7   -0.16    0.16
 -14   0  -7    0.10    0.10
 -12   0  -7    0.08    0.07
 -10   0  -7    0.06    0.06
  -8   0  -7    0.07    0.05
  -6   0  -7   -0.08    0.04
  -4   0  -7    0.25    0.05
  -2   0  -7    0.02    0.03
   0   0  -7   -0.03    0.03
   2   0  -7    0.01    0.03
   4   0  -7    0.08    0.04
   6   0  -7    0.03    0.03
   8   0  -7    0.02    0.04
  10   0  -7    0.03    0.05
  12   0  -7    0.18    0.09
  14   0  -7    0.00    0.10
  16   0  -7   -0.10    0.12
  18   0  -7    0.15    0.23
 -17   1  -7   53.63    1.14
 -15   1  -7   61.75    1.31
 -13   1  -7  137.40    1.66
 -11   1  -7   69.35    0.86
  -9   1  -7   56.23    0.69
  -7   1  -7   31.28    0.40
  -5   1  -7   16.63    0.22
  -3   1  -7   15.05    0.24
  -1   1  -7  449.80    5.54
   1   1  -7  315.37    3.85
   3   1  -7  128.03    1.55
   5   1  -7  325.47    4.84
   7   1  -7  172.68    2.55
   9   1  -7   45.10    0.70
  11   1  -7   48.46    0.74
  13   1  -7    6.99    0.19
  15   1  -7    3.97    0.18
  17   1  -7   24.36    0.62
  19   1  -7    8.05    0.30
 -14   2  -7    0.30    0.09
 -12   2  -7    0.62    0.07
 -10   2  -7   11.22    0.17
  -8   2  -7    3.86    0.09
  -6   2  -7    8.31    0.13
  -4   2  -7   11.58    0.16
  -2   2  -7    4.61    0.09
   0   2  -7    6.20    0.11
   2   2  -7    7.95    0.11
   4   2  -7    0.81    0.04
   6   2  -7    8.52    0.17
   8   2  -7   16.68    0.28
  10   2  -7    6.70    0.16
  12   2  -7    0.99    0.10
  14   2  -7    0.17    0.11
  16   2  -7    0.53    0.13
  18   2  -7    2.55    0.20
 -15   3  -7   90.34    1.37
 -13   3  -7  117.01    1.43
 -11   3  -7   20.91    0.29
  -9   3  -7   80.42    0.98
  -7   3  -7   68.39    0.84
  -5   3  -7   10.29    0.15
  -3   3  -7   48.64    0.59
  -1   3  -7   59.43    0.87
   1   3  -7  387.00    5.54
   3   3  -7  176.01    2.11
   5   3  -7   48.42    0.75
   7   3  -7  192.79    2.85
   9   3  -7   37.76    0.59
  11   3  -7   10.56    0.22
  13   3  -7    3.75    0.16
  15   3  -7    4.83    0.19
  17   3  -7   10.40    0.23
  19   3  -7    1.69    0.15
 -16   4  -7    7.06    0.32
 -14   4  -7   -0.06    0.10
 -12   4  -7   42.93    0.55
 -10   4  -7    0.85    0.07
  -8   4  -7   10.42    0.16
  -6   4  -7   85.40    1.04
  -4   4  -7    2.78    0.07
  -2   4  -7    0.24    0.04
   0   4  -7   41.61    0.51
   2   4  -7  141.86    3.03
   4   4  -7    6.61    0.14
   6   4  -7    9.01    0.18
   8   4  -7   17.39    0.30
  10   4  -7   25.75    0.42
  12   4  -7   21.68    0.38
  14   4  -7   10.56    0.21
  16   4  -7    0.36    0.11
  18   4  -7    2.24    0.17
 -17   5  -7   37.71    0.89
 -15   5  -7   52.85    0.83
 -13   5  -7   20.43    0.37
 -11   5  -7   61.12    0.94
  -9   5  -7    0.59    0.07
  -7   5  -7    4.29    0.10
  -5   5  -7   12.76    0.18
  -3   5  -7   17.33    0.23
  -1   5  -7    1.04    0.05
   1   5  -7  692.45    9.10
   3   5  -7  279.45    4.22
   5   5  -7  162.57    2.03
   7   5  -7   55.06    0.71
   9   5  -7   61.45    0.78
  11   5  -7    5.88    0.14
  13   5  -7    1.07    0.10
  15   5  -7    2.68    0.16
  17   5  -7    6.88    0.25
 -16   6  -7    9.37    0.37
 -14   6  -7    4.80    0.19
 -12   6  -7   24.99    0.43
 -10   6  -7   12.68    0.20
  -8   6  -7    1.73    0.08
  -6   6  -7    4.14    0.12
  -4   6  -7    3.63    0.11
  -2   6  -7    9.75    0.18
   0   6  -7    0.28    0.04
   2   6  -7    6.55    0.11
   4   6  -7   15.61    0.27
   6   6  -7   96.20    1.21
   8   6  -7    1.36    0.09
  10   6  -7   49.86    0.65
  12   6  -7    1.19    0.10
  14   6  -7    2.35    0.15
  16   6  -7    1.93    0.14
  18   6  -7    1.21    0.14
 -17   7  -7   27.18    0.68
 -15   7  -7   58.09    1.28
 -13   7  -7   36.74    0.60
 -11   7  -7   23.00    0.40
  -9   7  -7   71.18    1.09
  -7   7  -7    7.56    0.13
  -5   7  -7    2.13    0.10
  -3   7  -7    1.00    0.09
  -1   7  -7    9.47    0.14
   1   7  -7  322.56    3.97
   3   7  -7   39.60    0.51
   5   7  -7  180.79    2.76
   7   7  -7  126.20    1.93
   9   7  -7   45.06    0.59
  11   7  -7    8.59    0.18
  13   7  -7   25.35    0.37
  15   7  -7    1.53    0.12
  17   7  -7    0.33    0.13
 -16   8  -7    2.70    0.30
 -14   8  -7   12.21    0.42
 -12   8  -7   39.39    0.63
 -10   8  -7    6.15    0.18
  -8   8  -7    0.16    0.08
  -6   8  -7   12.87    0.24
  -4   8  -7    7.28    0.16
  -2   8  -7    0.42    0.04
   0   8  -7   71.04    0.89
   2   8  -7   10.90    0.17
   4   8  -7    5.65    0.12
   6   8  -7   59.95    0.94
   8   8  -7   62.30    0.92
  10   8  -7    2.21    0.12
  12   8  -7    9.64    0.20
  14   8  -7    1.31    0.11
  16   8  -7   21.15    0.35
  18   8  -7    0.88    0.25
 -17   9  -7   27.34    0.72
 -15   9  -7   32.33    0.78
 -13   9  -7   33.78    0.81
 -11   9  -7   41.95    0.67
  -9   9  -7   21.86    0.38
  -7   9  -7   16.42    0.29
  -5   9  -7    4.93    0.10
  -3   9  -7   46.51    0.60
  -1   9  -7   10.14    0.16
   1   9  -7  181.35    2.22
   3   9  -7   38.98    0.50
   5   9  -7   61.21    0.79
   7   9  -7   39.06    0.52
   9   9  -7   94.54    1.21
  11   9  -7    9.57    0.19
  13   9  -7    6.58    0.18
  15   9  -7    1.16    0.12
  17   9  -7    0.59    0.18
 -16  10  -7   12.58    0.46
 -14  10  -7   11.30    0.42
 -12  10  -7   22.58    0.59
 -10  10  -7    7.91    0.21
  -8  10  -7    2.28    0.14
  -6  10  -7    8.44    0.19
  -4  10  -7   45.23    0.71
  -2  10  -7    0.52    0.06
   0  10  -7   41.95    0.55
   2  10  -7    3.32    0.10
   4  10  -7   49.62    0.64
   6  10  -7   42.98    0.57
   8  10  -7  186.59    2.34
  10  10  -7   15.80    0.26
  12  10  -7    6.33    0.17
  14  10  -7    1.56    0.12
  16  10  -7    5.57    0.27
 -15  11  -7   38.08    0.92
 -13  11  -7   40.76    0.96
 -11  11  -7   28.33    0.71
  -9  11  -7   20.30    0.53
  -7  11  -7    0.68    0.10
  -5  11  -7    0.32    0.09
  -3  11  -7    3.42    0.14
  -1  11  -7    9.09    0.16
   1  11  -7   44.04    0.57
   3  11  -7   45.91    0.60
   5  11  -7  106.95    1.35
   7  11  -7  127.61    1.61
   9  11  -7   61.20    0.80
  11  11  -7   24.66    0.37
  13  11  -7   16.23    0.28
  15  11  -7    0.07    0.17
 -14  12  -7   18.83    0.56
 -12  12  -7   12.38    0.44
 -10  12  -7   15.50    0.47
  -8  12  -7    3.72    0.25
  -6  12  -7    0.17    0.09
  -4  12  -7   26.66    0.45
  -2  12  -7    2.72    0.11
   0  12  -7   75.19    0.95
   2  12  -7    3.51    0.12
   4  12  -7   31.43    0.43
   6  12  -7    6.41    0.16
   8  12  -7   18.79    0.29
  10  12  -7    3.46    0.15
  12  12  -7    6.90    0.19
  14  12  -7    2.64    0.24
 -13  13  -7   26.80    0.69
 -11  13  -7    6.13    0.34
  -9  13  -7    8.64    0.35
  -7  13  -7    0.23    0.17
  -5  13  -7    0.21    0.10
  -3  13  -7    0.06    0.09
  -1  13  -7   19.34    0.30
   1  13  -7    0.33    0.08
   3  13  -7   15.32    0.24
   5  13  -7   35.96    0.49
   7  13  -7   41.02    0.55
   9  13  -7   12.59    0.23
  11  13  -7    9.68    0.22
  13  13  -7    0.41    0.16
  15  13  -7    0.92    0.25
 -12  14  -7   17.20    0.54
 -10  14  -7   36.88    0.89
  -8  14  -7    9.42    0.36
  -6  14  -7   -0.13    0.17
  -4  14  -7    6.41    0.19
  -2  14  -7    9.00    0.22
   0  14  -7   73.49    1.14
   2  14  -7   31.96    0.44
   4  14  -7   29.82    0.41
   6  14  -7   25.39    0.37
   8  14  -7   59.48    0.78
  10  14  -7   11.01    0.23
  12  14  -7    1.52    0.18
  14  14  -7    1.83    0.20
 -11  15  -7    3.60    0.35
  -9  15  -7   17.85    0.55
  -7  15  -7    0.30    0.19
  -5  15  -7    0.89    0.19
  -3  15  -7    3.66    0.17
  -1  15  -7    2.34    0.16
   1  15  -7    9.22    0.23
   3  15  -7   12.41    0.22
   5  15  -7   15.18    0.26
   7  15  -7   13.67    0.25
   9  15  -7   17.80    0.30
  11  15  -7    7.95    0.29
  13  15  -7    0.41    0.18
 -10  16  -7   25.30    0.68
  -8  16  -7    1.17    0.22
  -6  16  -7    9.29    0.37
  -4  16  -7    3.16    0.27
  -2  16  -7    2.08    0.15
   0  16  -7   42.98    0.69
   2  16  -7   18.09    0.35
   4  16  -7   36.51    0.50
   6  16  -7   39.27    0.54
   8  16  -7   19.74    0.32
  10  16  -7   12.58    0.33
  12  16  -7    0.52    0.26
  -9  17  -7    2.01    0.26
  -7  17  -7    0.64    0.22
  -5  17  -7    0.15    0.20
  -3  17  -7    0.46    0.19
  -1  17  -7    0.22    0.19
   1  17  -7    2.30    0.19
   3  17  -7   13.02    0.29
   5  17  -7    0.47    0.11
   7  17  -7   13.74    0.26
   9  17  -7    0.17    0.17
  -8  18  -7   14.25    0.51
  -6  18  -7    0.25    0.22
  -4  18  -7    0.51    0.22
  -2  18  -7    0.85    0.20
   0  18  -7   34.51    0.83
   2  18  -7   32.24    0.55
   4  18  -7   24.79    0.46
   6  18  -7   16.60    0.30
   8  18  -7   19.71    0.43
  -5  19  -7    1.11    0.24
  -3  19  -7    2.64    0.32
  -1  19  -7    6.34    0.34
   1  19  -7    0.81    0.22
   3  19  -7   -0.07    0.14
   5  19  -7   -0.06    0.15
   7  19  -7    5.97    0.40
  -2  20  -7    5.32    0.36
   0  20  -7   17.30    0.52
   2  20  -7   19.15    0.55
  -2 -20  -6    1.08    0.26
   0 -20  -6    1.34    0.26
   2 -20  -6    0.04    0.24
  -5 -19  -6    5.20    0.35
  -3 -19  -6    2.47    0.27
  -1 -19  -6    0.25    0.23
   1 -19  -6    3.80    0.34
   3 -19  -6   16.74    0.53
   5 -19  -6   13.90    0.48
   7 -19  -6   11.54    0.46
  -8 -18  -6    0.70    0.23
  -6 -18  -6    1.91    0.24
  -4 -18  -6    1.12    0.23
  -2 -18  -6    1.35    0.23
   0 -18  -6    0.87    0.23
   2 -18  -6   -0.05    0.22
   4 -18  -6    0.29    0.22
   6 -18  -6    1.49    0.24
   8 -18  -6   -0.06    0.23
  -9 -17  -6   35.34    0.85
  -7 -17  -6   16.00    0.48
  -5 -17  -6    0.41    0.21
  -3 -17  -6    0.10    0.21
  -1 -17  -6    5.70    0.32
   1 -17  -6    4.87    0.32
   3 -17  -6   17.85    0.52
   5 -17  -6   39.41    0.93
   7 -17  -6   20.95    0.59
   9 -17  -6   11.37    0.44
  11 -17  -6   12.37    0.47
 -10 -16  -6    9.29    0.36
  -8 -16  -6    3.13    0.28
  -6 -16  -6    0.61    0.19
  -4 -16  -6   -0.01    0.19
  -2 -16  -6    2.78    0.27
   0 -16  -6    4.96    0.30
   2 -16  -6   11.90    0.41
   4 -16  -6    3.69    0.29
   6 -16  -6    5.61    0.32
   8 -16  -6   12.30    0.42
  10 -16  -6    5.39    0.35
  12 -16  -6    0.35    0.18
 -11 -15  -6   44.74    0.95
  -9 -15  -6   19.35    0.52
  -7 -15  -6   22.45    0.57
  -5 -15  -6    1.63    0.19
  -3 -15  -6   -0.04    0.18
  -1 -15  -6    8.63    0.32
   1 -15  -6    2.40    0.26
   3 -15  -6   32.14    0.76
   5 -15  -6   28.19    0.69
   7 -15  -6   37.02    0.86
   9 -15  -6   22.97    0.60
  11 -15  -6   24.67    0.46
  13 -15  -6    2.51    0.21
 -10 -14  -6   21.14    0.54
  -8 -14  -6    2.75    0.24
  -6 -14  -6    0.94    0.17
  -4 -14  -6    0.10    0.17
  -2 -14  -6    4.15    0.25
   0 -14  -6    0.30    0.16
   2 -14  -6    3.76    0.25
   4 -14  -6    2.35    0.24
   6 -14  -6   40.70    0.92
   8 -14  -6   21.55    0.55
  10 -14  -6    8.13    0.35
  12 -14  -6    1.66    0.17
  14 -14  -6   -0.20    0.17
 -11 -13  -6   29.38    0.69
  -9 -13  -6   46.48    1.04
  -7 -13  -6   17.96    0.47
  -5 -13  -6    2.75    0.22
  -3 -13  -6   20.04    0.50
  -1 -13  -6   60.42    1.28
   1 -13  -6   27.89    0.65
   3 -13  -6   80.48    1.70
   5 -13  -6   35.90    0.82
   7 -13  -6  110.83    2.32
   9 -13  -6    8.19    0.33
  11 -13  -6   24.98    0.45
  13 -13  -6   10.93    0.29
  15 -13  -6    0.32    0.17
 -12 -12  -6   31.10    0.73
 -10 -12  -6   20.20    0.51
  -8 -12  -6    4.85    0.24
  -6 -12  -6    4.57    0.23
  -4 -12  -6   35.50    0.79
  -2 -12  -6    2.03    0.19
   0 -12  -6    3.47    0.21
   2 -12  -6    3.98    0.22
   4 -12  -6   11.10    0.34
   6 -12  -6   73.76    1.56
   8 -12  -6   30.25    0.70
  10 -12  -6   16.70    0.33
  12 -12  -6   20.98    0.40
  14 -12  -6    3.40    0.23
 -11 -11  -6   13.58    0.38
  -9 -11  -6    7.24    0.27
  -7 -11  -6    8.43    0.28
  -5 -11  -6    0.27    0.13
  -3 -11  -6    3.50    0.20
  -1 -11  -6    0.44    0.13
   1 -11  -6   18.57    0.47
   3 -11  -6   41.17    0.89
   5 -11  -6   17.85    0.44
   7 -11  -6  111.07    2.25
   9 -11  -6   30.36    0.67
  11 -11  -6   15.89    0.32
  13 -11  -6    8.49    0.25
  15 -11  -6    1.18    0.16
 -12 -10  -6   24.34    0.58
 -10 -10  -6   30.58    0.68
  -8 -10  -6   41.07    0.89
  -6 -10  -6   43.64    0.96
  -4 -10  -6    0.21    0.11
  -2 -10  -6    0.38    0.12
   0 -10  -6    7.22    0.24
   2 -10  -6   26.24    0.59
   4 -10  -6   44.44    0.95
   6 -10  -6   20.15    0.49
   8 -10  -6   17.58    0.44
  10 -10  -6   88.78    1.32
  12 -10  -6   19.73    0.37
  14 -10  -6   12.90    0.30
  16 -10  -6    1.74    0.28
 -13  -9  -6   52.30    1.11
 -11  -9  -6   37.34    0.81
  -9  -9  -6   81.64    1.67
  -7  -9  -6   18.34    0.45
  -5  -9  -6    0.69    0.12
  -3  -9  -6    1.46    0.15
  -1  -9  -6    0.44    0.10
   1  -9  -6    6.04    0.20
   3  -9  -6   40.93    0.89
   5  -9  -6   53.79    1.12
   7  -9  -6  200.04    4.05
   9  -9  -6   49.85    0.76
  11  -9  -6   26.83    0.45
  13  -9  -6   18.71    0.47
  15  -9  -6    1.76    0.18
 -14  -8  -6   54.48    1.16
 -12  -8  -6   47.63    1.00
 -10  -8  -6   47.36    1.01
  -8  -8  -6   99.20    2.05
  -6  -8  -6   43.56    0.93
  -4  -8  -6    0.84    0.10
  -2  -8  -6    3.31    0.15
   0  -8  -6  127.47    2.61
   2  -8  -6   66.78    1.39
   4  -8  -6  105.93    2.15
   6  -8  -6  112.24    2.25
   8  -8  -6   46.16    0.70
  10  -8  -6   15.80    0.29
  12  -8  -6   80.79    1.66
  14  -8  -6   17.85    0.35
  16  -8  -6    0.77    0.25
  18  -8  -6    0.49    0.27
 -13  -7  -6   56.14    1.19
 -11  -7  -6   35.07    0.76
  -9  -7  -6    3.20    0.18
  -7  -7  -6    8.71    0.25
  -5  -7  -6    2.27    0.14
  -3  -7  -6    0.30    0.09
  -1  -7  -6   10.33    0.18
   1  -7  -6    2.61    0.13
   3  -7  -6   22.40    0.50
   5  -7  -6   23.43    0.37
   7  -7  -6   43.79    0.66
   9  -7  -6    1.46    0.12
  11  -7  -6   49.06    1.03
  13  -7  -6   26.65    0.46
  15  -7  -6    0.03    0.21
  17  -7  -6    0.02    0.24
 -14  -6  -6   68.79    1.41
 -12  -6  -6   53.06    1.10
 -10  -6  -6   67.59    1.40
  -8  -6  -6  108.04    2.20
  -6  -6  -6   13.87    0.25
  -4  -6  -6    2.36    0.09
  -2  -6  -6    6.21    0.09
   0  -6  -6   70.21    0.84
   2  -6  -6   63.32    0.75
   4  -6  -6   60.47    0.88
   6  -6  -6  194.46    2.78
   8  -6  -6   86.04    1.25
  10  -6  -6   85.19    1.25
  12  -6  -6  127.61    2.60
  14  -6  -6   24.32    0.42
  16  -6  -6    1.16    0.24
  18  -6  -6    1.40    0.28
 -15  -5  -6   37.23    0.83
 -13  -5  -6   17.04    0.42
 -11  -5  -6   21.90    0.50
  -9  -5  -6   65.10    1.36
  -7  -5  -6   44.81    0.69
  -5  -5  -6   38.99    0.59
  -3  -5  -6   35.94    0.54
  -1  -5  -6    1.05    0.04
   1  -5  -6   14.83    0.19
   3  -5  -6    3.40    0.06
   5  -5  -6   34.90    0.53
   7  -5  -6   75.23    1.11
   9  -5  -6   71.42    0.88
  11  -5  -6   51.81    0.79
  13  -5  -6    4.52    0.17
  15  -5  -6    1.56    0.22
  17  -5  -6   -0.35    0.24
 -16  -4  -6   79.55    1.67
 -14  -4  -6   87.54    1.81
 -12  -4  -6   79.83    1.73
 -10  -4  -6  113.91    2.34
  -8  -4  -6  111.13    2.27
  -6  -4  -6   37.13    0.57
  -4  -4  -6    2.47    0.08
  -2  -4  -6   40.38    0.61
   0  -4  -6   57.24    0.69
   2  -4  -6  689.30    8.30
   4  -4  -6  322.67    3.85
   6  -4  -6  190.27    2.27
   8  -4  -6  141.67    1.68
  10  -4  -6  148.32    2.14
  12  -4  -6   31.38    0.40
  14  -4  -6   25.09    0.64
  16  -4  -6    0.06    0.22
  18  -4  -6    4.48    0.37
 -15  -3  -6   13.06    0.37
 -13  -3  -6    0.04    0.13
 -11  -3  -6    1.29    0.16
  -9  -3  -6   30.98    0.67
  -7  -3  -6   27.24    0.58
  -5  -3  -6   21.94    0.35
  -3  -3  -6    1.34    0.06
  -1  -3  -6    4.11    0.07
   1  -3  -6   72.34    0.87
   3  -3  -6    6.16    0.09
   5  -3  -6    8.16    0.12
   7  -3  -6   11.04    0.16
   9  -3  -6   14.07    0.19
  11  -3  -6   10.15    0.16
  13  -3  -6   11.51    0.24
  15  -3  -6    0.02    0.20
  17  -3  -6   -0.24    0.24
  19  -3  -6    1.76    0.29
 -16  -2  -6   44.15    0.96
 -14  -2  -6   98.62    2.04
 -12  -2  -6   26.01    0.59
 -10  -2  -6  168.61    2.48
  -8  -2  -6  287.50    3.45
  -6  -2  -6   23.64    0.36
  -4  -2  -6  234.66    2.89
  -2  -2  -6   14.27    0.20
   0  -2  -6   75.20    0.89
   2  -2  -6   60.74    0.73
   4  -2  -6  127.86    1.53
   6  -2  -6  539.80    6.45
   8  -2  -6  179.61    2.12
  10  -2  -6   50.61    0.61
  12  -2  -6   99.76    1.20
  14  -2  -6   37.94    0.62
  16  -2  -6    9.64    0.39
  18  -2  -6    0.99    0.26
 -17  -1  -6    0.66    0.17
 -15  -1  -6    2.04    0.21
 -13  -1  -6    0.99    0.14
 -11  -1  -6   27.14    0.44
  -9  -1  -6    0.07    0.05
  -7  -1  -6    3.82    0.08
  -5  -1  -6  165.47    2.41
  -3  -1  -6  161.85    2.00
  -1  -1  -6   23.39    0.29
   1  -1  -6   31.62    0.38
   3  -1  -6   24.30    0.30
   5  -1  -6   53.87    0.65
   7  -1  -6   20.75    0.26
   9  -1  -6   12.42    0.18
  11  -1  -6    0.33    0.06
  13  -1  -6    0.51    0.10
  15  -1  -6    7.83    0.22
  17  -1  -6    0.66    0.22
  19  -1  -6    0.71    0.25
 -16   0  -6   70.48    1.50
 -14   0  -6  242.73    4.92
 -12   0  -6   77.14    1.17
 -10   0  -6  118.47    1.43
  -8   0  -6   25.79    0.33
  -6   0  -6  193.15    2.57
  -4   0  -6  251.95    3.71
  -2   0  -6    0.87    0.05
   0   0  -6   50.78    0.62
   2   0  -6  562.95    6.71
   4   0  -6  760.66    9.36
   6   0  -6  424.52    5.03
   8   0  -6   61.19    0.74
  10   0  -6  161.71    1.93
  12   0  -6  131.24    1.95
  14   0  -6   19.29    0.35
  16   0  -6    0.32    0.12
  18   0  -6    7.59    0.38
 -15   1  -6    2.07    0.21
 -13   1  -6    1.10    0.08
 -11   1  -6   26.91    0.35
  -9   1  -6    0.30    0.06
  -7   1  -6    3.84    0.08
  -5   1  -6  165.85    1.99
  -3   1  -6  162.23    2.36
  -1   1  -6   23.23    0.35
   1   1  -6   30.68    0.38
   3   1  -6   24.37    0.30
   5   1  -6   54.12    0.82
   7   1  -6   20.55    0.33
   9   1  -6   12.67    0.23
  11   1  -6    0.27    0.08
  13   1  -6    0.46    0.10
  15   1  -6    8.09    0.22
  17   1  -6    0.68    0.14
  19   1  -6    0.49    0.18
 -14   2  -6   98.66    1.21
 -12   2  -6   25.79    0.35
 -10   2  -6  167.97    2.02
  -8   2  -6  285.84    3.45
  -6   2  -6   23.44    0.30
  -4   2  -6  237.94    3.44
  -2   2  -6   14.34    0.23
   0   2  -6   74.08    1.08
   2   2  -6   59.97    0.73
   4   2  -6  127.91    1.90
   6   2  -6  536.59    8.00
   8   2  -6  175.42    2.63
  10   2  -6   50.65    0.77
  12   2  -6  101.07    1.50
  14   2  -6   39.49    0.62
  16   2  -6   10.13    0.25
  18   2  -6    0.92    0.13
 -15   3  -6   13.17    0.39
 -13   3  -6    0.08    0.08
 -11   3  -6    1.35    0.08
  -9   3  -6   31.10    0.40
  -7   3  -6   26.31    0.34
  -5   3  -6   21.89    0.28
  -3   3  -6    1.47    0.06
  -1   3  -6    4.19    0.09
   1   3  -6   72.70    1.05
   3   3  -6    6.11    0.12
   5   3  -6    8.10    0.16
   7   3  -6   11.00    0.20
   9   3  -6   13.81    0.25
  11   3  -6   10.09    0.21
  13   3  -6   11.69    0.25
  15   3  -6   -0.05    0.10
  17   3  -6    0.13    0.12
  19   3  -6    1.85    0.15
 -16   4  -6   80.80    1.72
 -14   4  -6   87.16    1.33
 -12   4  -6   82.91    1.27
 -10   4  -6  113.20    1.38
  -8   4  -6  110.98    1.18
  -6   4  -6   37.50    0.41
  -4   4  -6    2.63    0.07
  -2   4  -6   41.20    0.60
   0   4  -6   57.67    0.70
   2   4  -6  695.01   10.56
   4   4  -6  313.49    4.79
   6   4  -6  186.99    2.82
   8   4  -6  138.26    2.09
  10   4  -6  145.24    2.18
  12   4  -6   31.50    0.43
  14   4  -6   25.56    0.37
  16   4  -6    0.19    0.11
  18   4  -6    4.70    0.20
 -15   5  -6   37.74    0.61
 -13   5  -6   16.51    0.31
 -11   5  -6   21.18    0.30
  -9   5  -6   64.88    0.83
  -7   5  -6   44.71    0.57
  -5   5  -6   38.27    0.42
  -3   5  -6   35.39    0.55
  -1   5  -6    1.04    0.09
   1   5  -6   14.44    0.24
   3   5  -6    3.57    0.12
   5   5  -6   34.66    0.48
   7   5  -6   74.65    0.94
   9   5  -6   72.30    0.91
  11   5  -6   51.97    0.67
  13   5  -6    4.92    0.15
  15   5  -6    2.22    0.15
  17   5  -6    0.15    0.12
  19   5  -6    0.04    0.17
 -16   6  -6   49.83    1.12
 -14   6  -6   65.99    1.04
 -12   6  -6   51.58    0.67
 -10   6  -6   66.41    0.85
  -8   6  -6  108.93    1.34
  -6   6  -6   14.28    0.20
  -4   6  -6    2.16    0.09
  -2   6  -6    6.16    0.13
   0   6  -6   68.34    0.87
   2   6  -6   61.32    0.78
   4   6  -6   59.07    0.75
   6   6  -6  189.91    2.38
   8   6  -6   84.29    1.07
  10   6  -6   84.65    1.07
  12   6  -6  126.77    1.60
  14   6  -6   24.58    0.36
  16   6  -6    2.47    0.16
  18   6  -6    1.98    0.19
 -17   7  -6    0.72    0.22
 -15   7  -6   12.09    0.41
 -13   7  -6   55.26    0.87
 -11   7  -6   34.40    0.56
  -9   7  -6    3.14    0.10
  -7   7  -6    8.93    0.14
  -5   7  -6    2.40    0.07
  -3   7  -6    0.07    0.04
  -1   7  -6   10.31    0.15
   1   7  -6    2.58    0.07
   3   7  -6   22.23    0.30
   5   7  -6   22.96    0.31
   7   7  -6   43.09    0.68
   9   7  -6    1.58    0.11
  11   7  -6   48.50    0.64
  13   7  -6   27.03    0.39
  15   7  -6    0.19    0.11
  17   7  -6    0.04    0.13
 -16   8  -6   32.29    0.79
 -14   8  -6   53.74    1.21
 -12   8  -6   45.19    0.73
 -10   8  -6   47.18    0.74
  -8   8  -6   99.42    1.25
  -6   8  -6   44.40    0.56
  -4   8  -6    0.91    0.06
  -2   8  -6    3.13    0.08
   0   8  -6  128.48    1.59
   2   8  -6   66.79    0.84
   4   8  -6  104.40    1.31
   6   8  -6  109.72    1.68
   8   8  -6   46.18    0.73
  10   8  -6   15.61    0.25
  12   8  -6   79.68    1.02
  14   8  -6   18.22    0.29
  16   8  -6    0.93    0.12
  18   8  -6    0.00    0.18
 -17   9  -6   37.32    0.89
 -15   9  -6   15.33    0.48
 -13   9  -6   52.28    1.17
 -11   9  -6   36.23    0.59
  -9   9  -6   79.98    1.23
  -7   9  -6   18.82    0.28
  -5   9  -6    0.74    0.05
  -3   9  -6    1.93    0.07
  -1   9  -6    0.49    0.05
   1   9  -6    6.10    0.12
   3   9  -6   41.67    0.54
   5   9  -6   53.01    0.68
   7   9  -6  197.89    2.47
   9   9  -6   49.14    0.65
  11   9  -6   26.23    0.38
  13   9  -6   18.06    0.29
  15   9  -6    2.32    0.17
  17   9  -6    4.56    0.40
 -16  10  -6   32.23    0.83
 -14  10  -6   33.48    0.82
 -12  10  -6   23.55    0.62
 -10  10  -6   29.74    0.72
  -8  10  -6   41.35    0.65
  -6  10  -6   44.47    0.70
  -4  10  -6    0.14    0.05
  -2  10  -6    0.47    0.06
   0  10  -6    7.56    0.14
   2  10  -6   26.43    0.35
   4  10  -6   44.38    0.58
   6  10  -6   20.47    0.29
   8  10  -6   17.24    0.26
  10  10  -6   88.11    1.12
  12  10  -6   19.33    0.31
  14  10  -6   13.02    0.25
  16  10  -6    2.04    0.19
 -15  11  -6   16.56    0.53
 -13  11  -6   35.11    0.86
 -11  11  -6   13.75    0.43
  -9  11  -6    6.80    0.31
  -7  11  -6    8.46    0.20
  -5  11  -6    0.17    0.08
  -3  11  -6    3.50    0.10
  -1  11  -6    0.41    0.06
   1  11  -6   19.60    0.28
   3  11  -6   40.98    0.54
   5  11  -6   17.51    0.26
   7  11  -6  108.39    1.37
   9  11  -6   28.69    0.40
  11  11  -6   15.72    0.27
  13  11  -6    8.64    0.20
  15  11  -6    1.39    0.18
 -14  12  -6   37.79    0.92
 -12  12  -6   31.80    0.78
 -10  12  -6   19.79    0.55
  -8  12  -6    4.85    0.26
  -6  12  -6    4.59    0.16
  -4  12  -6   35.55    0.57
  -2  12  -6    2.05    0.10
   0  12  -6    3.31    0.11
   2  12  -6    4.06    0.12
   4  12  -6   11.58    0.20
   6  12  -6   74.13    0.95
   8  12  -6   30.36    0.42
  10  12  -6   16.44    0.27
  12  12  -6   20.79    0.33
  14  12  -6    3.40    0.25
 -13  13  -6   17.07    0.52
 -11  13  -6   29.37    0.74
  -9  13  -6   46.63    1.08
  -7  13  -6   18.43    0.49
  -5  13  -6    2.46    0.14
  -3  13  -6   19.98    0.35
  -1  13  -6   59.98    0.77
   1  13  -6   28.44    0.39
   3  13  -6   82.29    1.03
   5  13  -6   36.55    0.49
   7  13  -6  112.18    1.41
   9  13  -6    8.10    0.19
  11  13  -6   25.14    0.38
  13  13  -6   10.77    0.31
  15  13  -6    0.43    0.18
 -14  14  -6    3.85    0.36
 -12  14  -6    2.96    0.34
 -10  14  -6   20.45    0.58
  -8  14  -6    2.31    0.27
  -6  14  -6    1.10    0.18
  -4  14  -6    0.16    0.10
  -2  14  -6    4.35    0.16
   0  14  -6    0.42    0.08
   2  14  -6    4.30    0.14
   4  14  -6    2.58    0.13
   6  14  -6   41.51    0.55
   8  14  -6   21.27    0.33
  10  14  -6    8.38    0.20
  12  14  -6    1.27    0.17
  14  14  -6    0.21    0.18
 -13  15  -6    7.34    0.40
 -11  15  -6   39.37    0.96
  -9  15  -6   19.88    0.56
  -7  15  -6   21.81    0.59
  -5  15  -6    1.12    0.19
  -3  15  -6   -0.06    0.10
  -1  15  -6    8.27    0.21
   1  15  -6    2.59    0.13
   3  15  -6   33.13    0.45
   5  15  -6   29.00    0.41
   7  15  -6   37.50    0.51
   9  15  -6   22.89    0.36
  11  15  -6   24.33    0.49
  13  15  -6    2.02    0.29
 -12  16  -6    1.64    0.26
 -10  16  -6    9.75    0.41
  -8  16  -6    2.66    0.31
  -6  16  -6    0.47    0.19
  -4  16  -6   -0.17    0.18
  -2  16  -6    2.56    0.25
   0  16  -6    5.15    0.19
   2  16  -6   12.87    0.23
   4  16  -6    4.42    0.16
   6  16  -6    6.12    0.18
   8  16  -6   12.37    0.26
  10  16  -6    5.64    0.26
  12  16  -6    0.28    0.18
  -9  17  -6   37.34    0.89
  -7  17  -6   16.40    0.51
  -5  17  -6    0.46    0.20
  -3  17  -6   -0.01    0.19
  -1  17  -6    5.94    0.30
   1  17  -6    5.22    0.20
   3  17  -6   19.00    0.30
   5  17  -6   40.58    0.56
   7  17  -6   22.02    0.35
   9  17  -6   12.14    0.33
  11  17  -6   10.95    0.49
  -8  18  -6    0.69    0.24
  -6  18  -6    1.87    0.24
  -4  18  -6    0.82    0.21
  -2  18  -6    1.37    0.21
   0  18  -6    1.06    0.20
   2  18  -6    0.10    0.13
   4  18  -6    0.25    0.12
   6  18  -6    1.75    0.13
   8  18  -6    0.60    0.18
  -7  19  -6   17.10    0.55
  -5  19  -6    5.19    0.35
  -3  19  -6    2.79    0.31
  -1  19  -6    0.21    0.20
   1  19  -6    4.32    0.30
   3  19  -6   17.40    0.36
   5  19  -6   13.95    0.49
   7  19  -6   11.87    0.33
  -4  20  -6    1.23    0.25
  -2  20  -6    1.14    0.24
   0  20  -6    1.61    0.23
   2  20  -6    0.18    0.21
  -4 -20  -5   10.02    0.43
  -2 -20  -5    0.44    0.25
   0 -20  -5    0.37    0.24
   2 -20  -5    3.26    0.36
   4 -20  -5    4.36    0.36
  -7 -19  -5    1.44    0.25
  -5 -19  -5    0.25    0.24
  -3 -19  -5    0.04    0.23
  -1 -19  -5    3.75    0.32
   1 -19  -5    4.93    0.35
   3 -19  -5    0.12    0.22
   5 -19  -5    0.23    0.23
   7 -19  -5    3.54    0.36
  -8 -18  -5   18.95    0.54
  -6 -18  -5    7.67    0.36
  -4 -18  -5   17.41    0.51
  -2 -18  -5    2.02    0.24
   0 -18  -5    0.30    0.21
   2 -18  -5    0.21    0.22
   4 -18  -5    9.32    0.39
   6 -18  -5   10.08    0.42
   8 -18  -5   23.04    0.64
  -9 -17  -5    7.64    0.35
  -7 -17  -5    2.38    0.28
  -5 -17  -5    1.25    0.22
  -3 -17  -5    1.70    0.22
  -1 -17  -5    0.33    0.20
   1 -17  -5    0.74    0.21
   3 -17  -5    0.63    0.20
   5 -17  -5    2.29    0.29
   7 -17  -5    5.61    0.34
   9 -17  -5    3.45    0.33
  11 -17  -5    6.37    0.39
 -10 -16  -5   59.42    1.24
  -8 -16  -5   14.59    0.43
  -6 -16  -5    4.14    0.28
  -4 -16  -5    1.97    0.21
  -2 -16  -5    1.49    0.20
   0 -16  -5    2.15    0.27
   2 -16  -5    0.39    0.19
   4 -16  -5   12.43    0.41
   6 -16  -5   23.48    0.62
   8 -16  -5   42.28    0.98
  10 -16  -5   36.74    0.88
  12 -16  -5   10.65    0.43
  -9 -15  -5   33.54    0.79
  -7 -15  -5    1.96    0.24
  -5 -15  -5   12.36    0.39
  -3 -15  -5    0.03    0.17
  -1 -15  -5    9.72    0.34
   1 -15  -5    6.74    0.30
   3 -15  -5    0.93    0.18
   5 -15  -5    4.76    0.29
   7 -15  -5   12.97    0.42
   9 -15  -5    5.44    0.33
  11 -15  -5    2.62    0.32
  13 -15  -5    0.23    0.17
 -10 -14  -5   43.76    0.98
  -8 -14  -5   12.24    0.37
  -6 -14  -5   18.81    0.47
  -4 -14  -5   25.21    0.61
  -2 -14  -5    1.70    0.22
   0 -14  -5    3.21    0.24
   2 -14  -5    3.48    0.25
   4 -14  -5   58.42    1.26
   6 -14  -5   45.86    1.00
   8 -14  -5   48.46    1.08
  10 -14  -5   24.98    0.64
  12 -14  -5   34.87    0.60
  14 -14  -5    3.77    0.25
 -11 -13  -5   36.58    0.83
  -9 -13  -5   20.45    0.51
  -7 -13  -5    0.62    0.16
  -5 -13  -5   20.93    0.51
  -3 -13  -5    2.63    0.22
  -1 -13  -5    8.48    0.29
   1 -13  -5    4.12    0.24
   3 -13  -5   17.90    0.46
   5 -13  -5   18.03    0.46
   7 -13  -5   33.20    0.77
   9 -13  -5   11.96    0.38
  11 -13  -5    9.55    0.36
  13 -13  -5    1.76    0.17
  15 -13  -5    8.57    0.29
 -12 -12  -5   42.42    0.89
 -10 -12  -5   38.75    0.92
  -8 -12  -5    9.22    0.30
  -6 -12  -5    7.10    0.26
  -4 -12  -5   14.19    0.38
  -2 -12  -5   41.28    0.90
   0 -12  -5   45.14    1.00
   2 -12  -5   49.05    1.08
   4 -12  -5   39.15    0.88
   6 -12  -5   92.62    1.92
   8 -12  -5  121.58    2.54
  10 -12  -5   16.14    0.45
  12 -12  -5   17.53    0.35
  14 -12  -5    9.58    0.28
  16 -12  -5    7.15    0.28
 -11 -11  -5   32.28    0.73
  -9 -11  -5   37.21    0.82
  -7 -11  -5   32.50    0.73
  -5 -11  -5   21.25    0.51
  -3 -11  -5   32.82    0.72
  -1 -11  -5    0.03    0.12
   1 -11  -5    0.28    0.12
   3 -11  -5    1.53    0.18
   5 -11  -5    8.26    0.28
   7 -11  -5    4.45    0.23
   9 -11  -5   18.79    0.47
  11 -11  -5   41.80    0.67
  13 -11  -5   11.89    0.29
  15 -11  -5    5.20    0.24
 -12 -10  -5   42.23    0.92
 -10 -10  -5   69.41    1.43
  -8 -10  -5   24.64    0.57
  -6 -10  -5   15.40    0.38
  -4 -10  -5    2.34    0.16
  -2 -10  -5   46.11    0.98
   0 -10  -5    3.02    0.17
   2 -10  -5    8.03    0.25
   4 -10  -5   20.21    0.47
   6 -10  -5   71.29    1.47
   8 -10  -5   84.18    1.72
  10 -10  -5   33.03    0.73
  12 -10  -5   12.72    0.28
  14 -10  -5   10.33    0.27
  16 -10  -5   30.57    0.55
 -13  -9  -5   16.00    0.42
 -11  -9  -5   69.96    1.44
  -9  -9  -5   44.23    0.95
  -7  -9  -5   72.97    1.54
  -5  -9  -5   12.90    0.32
  -3  -9  -5    0.76    0.11
  -1  -9  -5    1.60    0.14
   1  -9  -5   34.52    0.75
   3  -9  -5   38.40    0.84
   5  -9  -5   90.32    1.83
   7  -9  -5   18.57    0.44
   9  -9  -5   66.34    1.37
  11  -9  -5    9.75    0.23
  13  -9  -5   30.54    0.51
  15  -9  -5    5.76    0.23
  17  -9  -5   11.68    0.50
 -12  -8  -5   29.63    0.67
 -10  -8  -5   34.61    0.75
  -8  -8  -5   37.60    0.85
  -6  -8  -5    3.50    0.17
  -4  -8  -5   32.45    0.70
  -2  -8  -5    1.16    0.12
   0  -8  -5   19.51    0.44
   2  -8  -5    5.59    0.19
   4  -8  -5   29.40    0.64
   6  -8  -5   85.62    1.72
   8  -8  -5    6.27    0.22
  10  -8  -5   24.34    0.41
  12  -8  -5   31.34    0.51
  14  -8  -5    0.44    0.13
  16  -8  -5    1.08    0.25
 -13  -7  -5   66.89    1.39
 -11  -7  -5  167.67    3.35
  -9  -7  -5   74.48    1.54
  -7  -7  -5  129.01    2.63
  -5  -7  -5   49.23    1.04
  -3  -7  -5   59.70    1.23
  -1  -7  -5   37.31    0.77
   1  -7  -5   61.05    1.26
   3  -7  -5   18.42    0.42
   5  -7  -5  145.07    2.92
   7  -7  -5  135.73    2.73
   9  -7  -5  118.79    1.73
  11  -7  -5   47.77    0.73
  13  -7  -5  210.00    4.28
  15  -7  -5    0.73    0.13
 -14  -6  -5   12.73    0.35
 -12  -6  -5   55.39    1.16
 -10  -6  -5   28.39    0.62
  -8  -6  -5   40.10    0.86
  -6  -6  -5   38.57    0.81
  -4  -6  -5    4.44    0.15
  -2  -6  -5    2.24    0.07
   0  -6  -5    7.75    0.14
   2  -6  -5   61.07    1.25
   4  -6  -5   10.17    0.26
   6  -6  -5   30.40    0.47
   8  -6  -5   52.53    0.78
  10  -6  -5   80.91    1.20
  12  -6  -5    2.83    0.16
  14  -6  -5   38.93    0.61
  16  -6  -5    5.63    0.35
  18  -6  -5    1.19    0.27
 -15  -5  -5   84.73    1.74
 -13  -5  -5   87.86    1.80
 -11  -5  -5  218.69    4.43
  -9  -5  -5   51.86    1.07
  -7  -5  -5  206.58    4.18
  -5  -5  -5   57.38    0.85
  -3  -5  -5    1.22    0.06
  -1  -5  -5   52.29    0.63
   1  -5  -5  177.24    2.11
   3  -5  -5    2.83    0.08
   5  -5  -5  124.22    1.78
   7  -5  -5  135.01    1.94
   9  -5  -5  229.19    3.29
  11  -5  -5  170.87    3.44
  13  -5  -5  141.33    2.07
  15  -5  -5   17.67    0.51
  17  -5  -5    0.24    0.23
  19  -5  -5    0.18    0.27
 -14  -4  -5   15.10    0.40
 -12  -4  -5   71.39    1.49
 -10  -4  -5   37.68    0.80
  -8  -4  -5   45.77    0.96
  -6  -4  -5   39.84    0.60
  -4  -4  -5    0.20    0.04
  -2  -4  -5  124.61    1.84
   0  -4  -5    1.53    0.05
   2  -4  -5   17.32    0.22
   4  -4  -5   12.04    0.20
   6  -4  -5   41.82    0.51
   8  -4  -5    9.37    0.14
  10  -4  -5   16.24    0.23
  12  -4  -5   17.19    0.24
  14  -4  -5   30.51    0.74
  16  -4  -5   -0.06    0.21
  18  -4  -5    1.72    0.27
 -15  -3  -5   61.86    1.32
 -13  -3  -5   20.95    0.49
 -11  -3  -5  178.24    3.61
  -9  -3  -5  317.18    4.61
  -7  -3  -5   74.70    1.52
  -5  -3  -5  154.92    2.26
  -3  -3  -5  371.09    5.47
  -1  -3  -5   98.45    1.20
   1  -3  -5  264.59    3.19
   3  -3  -5   23.56    0.29
   5  -3  -5  334.60    3.99
   7  -3  -5  357.40    4.25
   9  -3  -5  246.90    2.94
  11  -3  -5  117.45    1.41
  13  -3  -5   66.09    1.01
  15  -3  -5   53.99    1.18
  17  -3  -5   18.27    0.55
  19  -3  -5   -0.31    0.26
 -16  -2  -5    2.94    0.22
 -14  -2  -5    1.04    0.14
 -12  -2  -5   28.60    0.63
 -10  -2  -5   18.39    0.31
  -8  -2  -5    7.96    0.16
  -6  -2  -5    5.84    0.11
  -4  -2  -5  155.53    1.85
  -2  -2  -5   70.28    0.85
   0  -2  -5   80.83    0.96
   2  -2  -5    4.58    0.07
   4  -2  -5   44.70    0.55
   6  -2  -5   67.55    0.81
   8  -2  -5    5.53    0.10
  10  -2  -5   19.31    0.25
  12  -2  -5    0.93    0.07
  14  -2  -5   13.10    0.27
  16  -2  -5    1.40    0.21
  18  -2  -5   -0.11    0.24
 -15  -1  -5   88.35    1.84
 -13  -1  -5   88.12    1.80
 -11  -1  -5   71.47    1.08
  -9  -1  -5  220.28    2.64
  -7  -1  -5   40.10    0.49
  -5  -1  -5  596.19    8.62
  -3  -1  -5   33.64    0.50
  -1  -1  -5  229.02    2.75
   1  -1  -5  452.40    5.35
   3  -1  -5   83.26    1.06
   5  -1  -5  367.77    4.40
   7  -1  -5  103.53    1.23
   9  -1  -5  273.34    3.27
  11  -1  -5  156.44    1.88
  13  -1  -5   59.79    0.91
  15  -1  -5   41.04    0.66
  17  -1  -5    6.57    0.35
  19  -1  -5    3.60    0.36
 -16   0  -5    0.21    0.15
 -14   0  -5    0.09    0.13
 -12   0  -5    0.20    0.08
 -10   0  -5    0.01    0.05
  -6   0  -5    0.16    0.03
  -4   0  -5    0.18    0.03
  -2   0  -5   -0.23    0.08
   0   0  -5   -0.19    0.06
   2   0  -5    0.06    0.02
   4   0  -5    0.14    0.02
   6   0  -5    0.11    0.03
   8   0  -5    0.11    0.04
  10   0  -5    0.23    0.05
  12   0  -5    0.10    0.09
  14   0  -5   -0.08    0.10
  16   0  -5    0.01    0.12
  18   0  -5   -0.18    0.21
 -15   1  -5   88.27    1.85
 -13   1  -5   87.02    1.31
 -11   1  -5   71.53    0.88
  -9   1  -5  219.27    2.64
  -7   1  -5   40.00    0.50
  -5   1  -5  590.06    8.63
  -3   1  -5   33.54    0.50
  -1   1  -5  231.40    3.33
   1   1  -5  438.53    5.35
   3   1  -5   83.02    1.00
   5   1  -5  370.02    5.46
   7   1  -5  103.16    1.53
   9   1  -5  276.19    4.05
  11   1  -5  160.58    2.34
  13   1  -5   59.89    0.91
  15   1  -5   42.35    0.66
  17   1  -5    7.16    0.23
  19   1  -5    4.07    0.20
 -14   2  -5    0.98    0.15
 -12   2  -5   28.12    0.37
 -10   2  -5   18.87    0.25
  -8   2  -5    7.48    0.13
  -6   2  -5    5.83    0.10
  -4   2  -5  158.07    2.24
  -2   2  -5   70.37    1.02
   0   2  -5   80.29    1.17
   2   2  -5    4.72    0.07
   4   2  -5   44.69    0.68
   6   2  -5   66.95    1.01
   8   2  -5    5.40    0.13
  10   2  -5   19.08    0.32
  12   2  -5    0.94    0.09
  14   2  -5   13.43    0.27
  16   2  -5    1.45    0.12
  18   2  -5    0.02    0.12
 -13   3  -5   20.90    0.36
 -11   3  -5  176.44    2.13
  -9   3  -5  314.15    3.31
  -7   3  -5   73.96    0.79
  -5   3  -5  153.38    1.87
  -3   3  -5  376.65    5.41
  -1   3  -5  101.43    1.20
   1   3  -5  269.47    4.06
   3   3  -5   22.92    0.36
   5   3  -5  330.10    4.96
   7   3  -5  352.90    5.26
   9   3  -5  244.98    3.65
  11   3  -5  117.76    1.76
  13   3  -5   69.15    1.04
  15   3  -5   52.55    0.70
  17   3  -5   18.43    0.31
  19   3  -5    0.05    0.13
 -14   4  -5   15.36    0.30
 -12   4  -5   71.08    0.91
 -10   4  -5   37.47    0.49
  -8   4  -5   45.82    0.50
  -6   4  -5   39.22    0.43
  -4   4  -5    0.16    0.04
  -2   4  -5  126.64    1.82
   0   4  -5    1.47    0.05
   2   4  -5   17.08    0.28
   4   4  -5   12.00    0.17
   6   4  -5   40.90    0.64
   8   4  -5    9.24    0.18
  10   4  -5   16.55    0.24
  12   4  -5   16.97    0.26
  14   4  -5   31.25    0.43
  16   4  -5    0.17    0.11
  18   4  -5    2.10    0.20
 -15   5  -5   83.75    1.80
 -13   5  -5   86.37    1.10
 -11   5  -5  217.13    2.70
  -9   5  -5   50.60    0.65
  -7   5  -5  204.97    2.55
  -5   5  -5   56.48    0.72
  -3   5  -5    1.29    0.10
  -1   5  -5   52.08    0.80
   1   5  -5  177.55    2.68
   3   5  -5    3.05    0.10
   5   5  -5  122.37    1.70
   7   5  -5  133.09    1.66
   9   5  -5  222.94    2.78
  11   5  -5  169.66    2.11
  13   5  -5  141.64    1.77
  15   5  -5   17.35    0.28
  17   5  -5    0.12    0.12
  19   5  -5    0.30    0.18
 -16   6  -5    3.28    0.29
 -14   6  -5   12.18    0.22
 -12   6  -5   54.25    0.71
 -10   6  -5   28.22    0.38
  -8   6  -5   40.31    0.52
  -6   6  -5   38.30    0.49
  -4   6  -5    3.97    0.08
  -2   6  -5    2.13    0.07
   0   6  -5    7.84    0.12
   2   6  -5   59.73    0.76
   4   6  -5   10.31    0.15
   6   6  -5   30.43    0.49
   8   6  -5   51.96    0.67
  10   6  -5   80.69    1.02
  12   6  -5    2.94    0.13
  14   6  -5   37.96    0.52
  16   6  -5    5.42    0.18
  18   6  -5    2.50    0.22
 -17   7  -5    6.42    0.35
 -15   7  -5   20.50    0.55
 -13   7  -5   65.44    1.02
 -11   7  -5  164.19    2.05
  -9   7  -5   74.17    0.94
  -7   7  -5  128.90    1.60
  -5   7  -5   49.79    0.63
  -3   7  -5   59.76    0.75
  -1   7  -5   36.12    0.47
   1   7  -5   60.40    0.76
   3   7  -5   18.65    0.25
   5   7  -5  142.50    1.78
   7   7  -5  133.25    2.05
   9   7  -5  117.32    1.47
  11   7  -5   46.92    0.62
  13   7  -5  210.81    2.62
  15   7  -5    0.61    0.14
  17   7  -5   18.83    0.42
 -16   8  -5   11.00    0.42
 -14   8  -5   18.31    0.52
 -12   8  -5   29.85    0.50
 -10   8  -5   34.65    0.46
  -8   8  -5   40.05    0.51
  -6   8  -5    3.57    0.09
  -4   8  -5   32.97    0.42
  -2   8  -5    1.08    0.06
   0   8  -5   19.71    0.27
   2   8  -5    5.64    0.11
   4   8  -5   29.03    0.39
   6   8  -5   82.92    1.09
   8   8  -5    6.17    0.16
  10   8  -5   24.20    0.34
  12   8  -5   31.25    0.43
  14   8  -5    0.33    0.10
  16   8  -5    1.51    0.17
  18   8  -5   21.33    0.46
 -17   9  -5    0.65    0.24
 -15   9  -5   31.25    0.78
 -13   9  -5   15.49    0.46
 -11   9  -5   66.40    1.49
  -9   9  -5   44.29    0.57
  -7   9  -5   74.83    0.94
  -5   9  -5   12.82    0.19
  -3   9  -5    0.91    0.06
  -1   9  -5    1.60    0.07
   1   9  -5   35.24    0.45
   3   9  -5   38.93    0.51
   5   9  -5   87.90    1.11
   7   9  -5   18.35    0.27
   9   9  -5   65.18    0.84
  11   9  -5    9.64    0.19
  13   9  -5   29.90    0.43
  15   9  -5    6.16    0.25
  17   9  -5   12.05    0.34
 -16  10  -5   13.11    0.46
 -14  10  -5   20.52    0.57
 -12  10  -5   40.88    0.96
 -10  10  -5   67.02    1.48
  -8  10  -5   25.36    0.34
  -6  10  -5   15.56    0.23
  -4  10  -5    2.60    0.09
  -2  10  -5   46.28    0.59
   0  10  -5    2.93    0.09
   2  10  -5    7.88    0.14
   4  10  -5   19.92    0.28
   6  10  -5   71.09    0.90
   8  10  -5   83.08    1.05
  10  10  -5   32.52    0.45
  12  10  -5   12.99    0.23
  14  10  -5   10.73    0.30
  16  10  -5   31.28    0.59
 -15  11  -5   41.32    0.98
 -13  11  -5    7.87    0.35
 -11  11  -5   31.69    0.78
  -9  11  -5   36.12    0.86
  -7  11  -5   33.00    0.53
  -5  11  -5   21.85    0.30
  -3  11  -5   32.69    0.43
  -1  11  -5    0.12    0.06
   1  11  -5    0.11    0.06
   3  11  -5    1.72    0.10
   5  11  -5    8.27    0.16
   7  11  -5    4.28    0.13
   9  11  -5   18.48    0.28
  11  11  -5   41.25    0.56
  13  11  -5   12.26    0.31
  15  11  -5    5.19    0.26
 -14  12  -5   30.28    0.76
 -12  12  -5   38.72    0.93
 -10  12  -5   42.37    0.97
  -8  12  -5    9.47    0.33
  -6  12  -5    7.32    0.18
  -4  12  -5   14.24    0.22
  -2  12  -5   41.58    0.54
   0  12  -5   47.18    0.60
   2  12  -5   51.37    0.65
   4  12  -5   40.93    0.53
   6  12  -5   92.73    1.17
   8  12  -5  123.07    1.55
  10  12  -5   16.19    0.27
  12  12  -5   16.98    0.38
  14  12  -5    9.55    0.31
  16  12  -5    7.32    0.31
 -15  13  -5    1.79    0.26
 -13  13  -5    5.21    0.35
 -11  13  -5   37.56    0.89
  -9  13  -5   20.46    0.55
  -7  13  -5    0.83    0.17
  -5  13  -5   20.89    0.36
  -3  13  -5    2.78    0.11
  -1  13  -5    8.32    0.16
   1  13  -5    4.31    0.12
   3  13  -5   18.53    0.27
   5  13  -5   17.71    0.27
   7  13  -5   33.87    0.46
   9  13  -5   11.77    0.22
  11  13  -5    9.72    0.28
  13  13  -5    1.79    0.20
  15  13  -5    8.64    0.31
 -14  14  -5    6.47    0.39
 -12  14  -5   36.14    0.87
 -10  14  -5   43.55    1.03
  -8  14  -5   12.34    0.41
  -6  14  -5   18.24    0.49
  -4  14  -5   25.45    0.62
  -2  14  -5    1.73    0.11
   0  14  -5    3.12    0.12
   2  14  -5    3.80    0.13
   4  14  -5   58.74    0.76
   6  14  -5   45.38    0.60
   8  14  -5   49.21    0.66
  10  14  -5   25.32    0.49
  12  14  -5   35.03    0.64
  14  14  -5    3.60    0.27
 -13  15  -5    3.10    0.36
 -11  15  -5    0.29    0.22
  -9  15  -5   33.71    0.83
  -7  15  -5    1.85    0.21
  -5  15  -5   12.07    0.40
  -3  15  -5    0.25    0.16
  -1  15  -5   10.03    0.19
   1  15  -5    7.07    0.16
   3  15  -5    1.25    0.10
   5  15  -5    5.30    0.16
   7  15  -5   13.32    0.24
   9  15  -5    5.68    0.24
  11  15  -5    2.65    0.24
  13  15  -5    0.01    0.18
 -12  16  -5   22.78    0.64
 -10  16  -5   55.07    1.27
  -8  16  -5   15.04    0.48
  -6  16  -5    4.17    0.29
  -4  16  -5    1.93    0.21
  -2  16  -5    1.36    0.18
   0  16  -5    2.23    0.14
   2  16  -5    0.21    0.09
   4  16  -5   13.41    0.24
   6  16  -5   24.96    0.37
   8  16  -5   43.37    0.74
  10  16  -5   37.02    0.67
  12  16  -5   10.61    0.33
 -11  17  -5    0.33    0.25
  -9  17  -5    7.92    0.39
  -7  17  -5    2.63    0.31
  -5  17  -5    0.95    0.21
  -3  17  -5    2.05    0.26
  -1  17  -5    0.12    0.17
   1  17  -5    0.70    0.10
   3  17  -5    0.90    0.11
   5  17  -5    2.15    0.14
   7  17  -5    5.75    0.25
   9  17  -5    3.03    0.25
  11  17  -5    6.25    0.29
  -8  18  -5   19.13    0.58
  -6  18  -5    8.08    0.37
  -4  18  -5   16.67    0.51
  -2  18  -5    2.42    0.27
   0  18  -5    0.12    0.18
   2  18  -5    0.34    0.13
   4  18  -5    9.41    0.21
   6  18  -5   10.97    0.30
   8  18  -5   24.02    0.48
  -7  19  -5    1.38    0.26
  -5  19  -5    0.02    0.22
  -3  19  -5   -0.18    0.20
  -1  19  -5    4.04    0.30
   1  19  -5    5.34    0.30
   3  19  -5    0.11    0.14
   5  19  -5    0.47    0.16
   7  19  -5    5.04    0.26
  -4  20  -5    9.98    0.42
  -2  20  -5    0.59    0.22
   0  20  -5    0.33    0.21
   2  20  -5    2.90    0.30
  -4 -20  -4    0.52    0.24
  -2 -20  -4    5.88    0.36
   0 -20  -4    0.43    0.24
   2 -20  -4    0.80    0.24
   4 -20  -4   -0.06    0.24
  -7 -19  -4    4.69    0.33
  -5 -19  -4   29.90    0.74
  -3 -19  -4    6.61    0.36
  -1 -19  -4    1.68    0.24
   1 -19  -4    9.26    0.40
   3 -19  -4    4.57    0.34
   5 -19  -4   10.31    0.43
   7 -19  -4   19.95    0.59
  -8 -18  -4    1.31    0.23
  -6 -18  -4    0.14    0.21
  -4 -18  -4    0.04    0.21
  -2 -18  -4    2.01    0.23
   0 -18  -4    1.26    0.23
   2 -18  -4    0.29    0.21
   4 -18  -4    0.94    0.22
   6 -18  -4    2.72    0.33
   8 -18  -4    7.98    0.39
  -9 -17  -4   70.94    1.44
  -7 -17  -4    1.23    0.20
  -5 -17  -4    7.54    0.34
  -3 -17  -4   13.22    0.42
  -1 -17  -4    2.01    0.22
   1 -17  -4    0.40    0.20
   3 -17  -4    1.47    0.21
   5 -17  -4    1.82    0.22
   7 -17  -4   26.69    0.68
   9 -17  -4   27.08    0.71
  11 -17  -4   22.12    0.64
  -8 -16  -4    7.87    0.33
  -6 -16  -4    2.21    0.21
  -4 -16  -4    5.21    0.29
  -2 -16  -4    2.55    0.26
   0 -16  -4    3.50    0.27
   2 -16  -4    1.66    0.20
   4 -16  -4    1.47    0.20
   6 -16  -4   18.10    0.52
   8 -16  -4    3.78    0.32
  10 -16  -4    8.44    0.39
  12 -16  -4    8.58    0.41
  -9 -15  -4   32.16    0.75
  -7 -15  -4    6.01    0.28
  -5 -15  -4   28.09    0.66
  -3 -15  -4   15.06    0.42
  -1 -15  -4    8.30    0.32
   1 -15  -4   21.72    0.55
   3 -15  -4    9.50    0.34
   5 -15  -4   17.94    0.49
   7 -15  -4   29.26    0.72
   9 -15  -4   12.57    0.42
  11 -15  -4   60.08    1.33
  13 -15  -4   26.87    0.70
 -10 -14  -4   31.23    0.73
  -8 -14  -4   10.30    0.33
  -6 -14  -4   72.85    1.53
  -4 -14  -4   26.46    0.61
  -2 -14  -4    3.07    0.23
   0 -14  -4    8.85    0.32
   2 -14  -4    8.08    0.30
   4 -14  -4   33.29    0.77
   6 -14  -4   30.68    0.72
   8 -14  -4    4.42    0.28
  10 -14  -4   25.47    0.65
  12 -14  -4    5.97    0.34
  14 -14  -4   24.91    0.48
 -11 -13  -4   23.21    0.55
  -9 -13  -4   24.79    0.59
  -7 -13  -4   34.51    0.77
  -5 -13  -4   46.49    1.02
  -3 -13  -4   23.11    0.55
  -1 -13  -4    0.56    0.15
   1 -13  -4   26.61    0.64
   3 -13  -4    5.52    0.26
   5 -13  -4   50.86    1.09
   7 -13  -4   45.07    1.00
   9 -13  -4   15.90    0.45
  11 -13  -4   48.50    1.06
  13 -13  -4   15.15    0.34
  15 -13  -4    2.68    0.22
 -10 -12  -4   37.55    0.82
  -8 -12  -4   21.42    0.51
  -6 -12  -4   40.81    0.90
  -4 -12  -4   26.88    0.61
  -2 -12  -4    0.19    0.13
   0 -12  -4    6.57    0.25
   2 -12  -4    2.93    0.21
   4 -12  -4   49.93    1.09
   6 -12  -4    9.66    0.31
   8 -12  -4    1.09    0.17
  10 -12  -4   32.17    0.74
  12 -12  -4   22.74    0.58
  14 -12  -4   14.31    0.33
  16 -12  -4    9.37    0.30
 -11 -11  -4   21.02    0.51
  -9 -11  -4   86.18    1.78
  -7 -11  -4   35.16    0.78
  -5 -11  -4   48.43    1.05
  -3 -11  -4   24.99    0.56
  -1 -11  -4  110.53    2.29
   1 -11  -4    0.19    0.12
   3 -11  -4    2.97    0.20
   5 -11  -4   16.35    0.42
   7 -11  -4   17.66    0.44
   9 -11  -4   10.89    0.33
  11 -11  -4   36.57    0.81
  13 -11  -4   25.13    0.45
  15 -11  -4   26.54    0.49
 -12 -10  -4    3.32    0.22
 -10 -10  -4   62.00    1.29
  -8 -10  -4   91.81    1.91
  -6 -10  -4   44.40    0.96
  -4 -10  -4   19.06    0.45
  -2 -10  -4   24.59    0.56
   0 -10  -4    2.81    0.16
   2 -10  -4    4.14    0.18
   4 -10  -4    8.35    0.26
   6 -10  -4   59.79    1.25
   8 -10  -4   72.42    1.52
  10 -10  -4   41.59    0.92
  12 -10  -4   31.31    0.53
  14 -10  -4   22.04    0.41
  16 -10  -4   11.22    0.30
 -11  -9  -4    2.39    0.19
  -9  -9  -4   33.89    0.73
  -7  -9  -4   39.79    0.84
  -5  -9  -4   23.26    0.56
  -3  -9  -4    4.52    0.17
  -1  -9  -4    1.75    0.14
   1  -9  -4    0.14    0.09
   3  -9  -4    3.65    0.17
   5  -9  -4   74.44    1.57
   7  -9  -4    7.59    0.25
   9  -9  -4    3.53    0.21
  11  -9  -4   21.45    0.38
  13  -9  -4   12.99    0.29
  15  -9  -4    0.55    0.15
  17  -9  -4   20.05    0.63
 -12  -8  -4   91.84    1.84
 -10  -8  -4   94.15    1.93
  -8  -8  -4   89.64    1.82
  -6  -8  -4   20.75    0.47
  -4  -8  -4   57.46    1.21
  -2  -8  -4   79.09    1.62
   0  -8  -4    2.37    0.13
   2  -8  -4    0.60    0.09
   4  -8  -4  104.26    2.14
   6  -8  -4   34.24    0.73
   8  -8  -4   95.11    1.96
  10  -8  -4   46.43    0.98
  12  -8  -4   54.65    0.84
  14  -8  -4   16.11    0.33
  16  -8  -4   16.31    0.35
  18  -8  -4    4.79    0.40
 -13  -7  -4    1.54    0.19
 -11  -7  -4    0.95    0.13
  -9  -7  -4   31.94    0.69
  -7  -7  -4   41.01    0.88
  -5  -7  -4   80.23    1.66
  -3  -7  -4  253.90    5.13
  -1  -7  -4   48.33    0.98
   1  -7  -4    0.90    0.10
   3  -7  -4   31.75    0.67
   5  -7  -4    2.09    0.14
   7  -7  -4   22.74    0.50
   9  -7  -4    1.34    0.16
  11  -7  -4   35.68    0.56
  13  -7  -4    0.30    0.12
  15  -7  -4    5.42    0.21
  17  -7  -4    2.76    0.35
 -14  -6  -4   20.49    0.49
 -12  -6  -4   93.55    1.91
 -10  -6  -4  100.32    2.03
  -8  -6  -4  191.28    3.84
  -6  -6  -4  287.52    5.78
  -4  -6  -4  155.42    3.13
  -2  -6  -4    1.05    0.09
   0  -6  -4    4.17    0.14
   2  -6  -4   93.42    1.93
   4  -6  -4    0.30    0.07
   6  -6  -4   56.83    1.16
   8  -6  -4  113.51    2.31
  10  -6  -4  113.03    1.65
  12  -6  -4  261.94    5.33
  14  -6  -4   57.74    0.89
  16  -6  -4   17.74    0.54
 -13  -5  -4    2.07    0.18
 -11  -5  -4   24.82    0.55
  -9  -5  -4   34.65    0.73
  -7  -5  -4    5.00    0.16
  -5  -5  -4    6.30    0.17
  -3  -5  -4    1.56    0.06
  -1  -5  -4   11.43    0.19
   1  -5  -4  100.36    1.47
   3  -5  -4   79.20    1.64
   5  -5  -4   47.64    0.99
   7  -5  -4   21.04    0.33
   9  -5  -4    0.28    0.05
  11  -5  -4    2.69    0.10
  13  -5  -4    3.06    0.15
  15  -5  -4   34.42    0.56
  17  -5  -4    0.30    0.23
  19  -5  -4    1.50    0.28
 -14  -4  -4   73.15    1.50
 -12  -4  -4   82.84    1.70
 -10  -4  -4  156.03    3.16
  -8  -4  -4  173.54    3.55
  -6  -4  -4  190.82    2.80
  -4  -4  -4  108.93    1.59
  -2  -4  -4  108.19    1.59
   0  -4  -4    7.53    0.13
   2  -4  -4    2.33    0.07
   4  -4  -4   82.53    1.21
   6  -4  -4  144.10    1.70
   8  -4  -4   84.26    1.01
  10  -4  -4   86.89    1.06
  12  -4  -4  224.72    3.31
  14  -4  -4   63.53    0.97
  16  -4  -4   18.91    0.54
  18  -4  -4    2.74    0.35
 -15  -3  -4    0.54    0.14
 -13  -3  -4   48.14    1.01
 -11  -3  -4   28.05    0.61
  -9  -3  -4   38.82    0.82
  -7  -3  -4   10.35    0.19
  -5  -3  -4   62.01    0.92
  -3  -3  -4  118.55    1.76
  -1  -3  -4   30.73    0.37
   1  -3  -4  248.26    3.01
   3  -3  -4   11.60    0.15
   5  -3  -4   78.31    0.94
   7  -3  -4   76.54    0.92
   9  -3  -4    0.29    0.05
  11  -3  -4   10.17    0.16
  13  -3  -4   15.95    0.25
  15  -3  -4    2.78    0.27
  17  -3  -4    0.65    0.23
  19  -3  -4    0.13    0.26
 -16  -2  -4   23.93    0.54
 -14  -2  -4    9.00    0.27
 -12  -2  -4   12.48    0.33
 -10  -2  -4  196.73    4.00
  -8  -2  -4  406.30    5.97
  -6  -2  -4  188.92    3.81
  -4  -2  -4  302.42    4.37
  -2  -2  -4  313.41    4.64
   0  -2  -4  250.57    3.68
   2  -2  -4  359.87    4.35
   4  -2  -4    8.59    0.11
   6  -2  -4   13.10    0.17
   8  -2  -4   76.90    0.93
  10  -2  -4  161.35    1.93
  12  -2  -4  167.25    2.48
  14  -2  -4   45.17    0.70
  16  -2  -4   40.73    0.93
  18  -2  -4   21.54    0.60
 -15  -1  -4    0.09    0.13
 -13  -1  -4    0.78    0.13
 -11  -1  -4    1.38    0.14
  -9  -1  -4    3.89    0.11
  -7  -1  -4    0.89    0.05
  -5  -1  -4   54.20    0.80
  -3  -1  -4    4.15    0.08
  -1  -1  -4   50.48    0.61
   1  -1  -4   26.62    0.33
   3  -1  -4  143.52    1.71
   5  -1  -4   14.47    0.18
   7  -1  -4    6.80    0.10
   9  -1  -4    4.85    0.09
  11  -1  -4    0.41    0.06
  13  -1  -4    5.35    0.16
  15  -1  -4    1.55    0.12
  17  -1  -4    0.02    0.13
  19  -1  -4    3.84    0.35
 -16   0  -4   31.08    0.70
 -14   0  -4   49.47    1.04
 -12   0  -4   58.48    1.23
 -10   0  -4  183.25    2.20
  -8   0  -4  102.40    1.24
  -6   0  -4  270.79    3.24
  -4   0  -4   13.69    0.21
  -2   0  -4  130.41    1.90
   0   0  -4   59.26    0.71
   2   0  -4   55.11    0.71
   4   0  -4  188.64    2.26
   6   0  -4   17.16    0.22
   8   0  -4    4.67    0.08
  10   0  -4  257.13    3.06
  12   0  -4  125.70    1.55
  14   0  -4   66.09    1.00
  16   0  -4   21.05    0.38
  18   0  -4    0.80    0.13
 -13   1  -4    0.66    0.12
 -11   1  -4    1.26    0.08
  -9   1  -4    4.16    0.09
  -7   1  -4    1.07    0.07
  -5   1  -4   55.31    0.81
  -3   1  -4    4.05    0.07
  -1   1  -4   50.36    0.74
   1   1  -4   25.59    0.33
   3   1  -4  144.43    2.12
   5   1  -4   14.19    0.23
   7   1  -4    6.61    0.10
   9   1  -4    4.81    0.09
  11   1  -4    0.30    0.05
  13   1  -4    5.32    0.17
  15   1  -4    1.66    0.12
  17   1  -4    0.11    0.11
  19   1  -4    3.83    0.20
 -12   2  -4   12.99    0.20
 -10   2  -4  197.52    2.36
  -8   2  -4  402.32    4.30
  -6   2  -4  187.84    1.99
  -4   2  -4  301.59    3.20
  -2   2  -4  319.33    3.79
   0   2  -4  252.80    3.63
   2   2  -4  369.00    5.26
   4   2  -4    8.26    0.15
   6   2  -4   13.03    0.22
   8   2  -4   77.89    1.16
  10   2  -4  163.73    2.40
  12   2  -4  171.78    2.52
  14   2  -4   46.14    0.70
  16   2  -4   40.05    0.55
  18   2  -4   21.29    0.34
 -13   3  -4   47.76    0.74
 -11   3  -4   28.07    0.38
  -9   3  -4   39.13    0.43
  -7   3  -4   10.89    0.13
  -5   3  -4   62.52    0.77
  -3   3  -4  121.14    1.44
  -1   3  -4   30.82    0.38
   1   3  -4  251.86    3.82
   3   3  -4   11.65    0.25
   5   3  -4   77.81    1.17
   7   3  -4   75.99    1.14
   9   3  -4    0.09    0.06
  11   3  -4   10.45    0.21
  13   3  -4   16.42    0.26
  15   3  -4    2.92    0.15
  17   3  -4    0.97    0.12
  19   3  -4    0.41    0.14
 -14   4  -4   71.16    1.14
 -12   4  -4   81.59    1.04
 -10   4  -4  154.13    1.93
  -8   4  -4  172.51    2.17
  -6   4  -4  187.08    2.90
  -4   4  -4  107.67    1.34
  -2   4  -4  109.19    1.61
   0   4  -4    7.10    0.10
   2   4  -4    2.32    0.06
   4   4  -4   82.76    1.27
   6   4  -4  140.84    1.77
   8   4  -4   83.81    1.05
  10   4  -4   87.62    1.10
  12   4  -4  229.60    3.36
  14   4  -4   65.50    0.84
  16   4  -4   19.51    0.31
  18   4  -4    3.04    0.18
 -15   5  -4    0.15    0.12
 -13   5  -4    1.94    0.11
 -11   5  -4   24.46    0.34
  -9   5  -4   34.25    0.45
  -7   5  -4    4.91    0.09
  -5   5  -4    5.99    0.12
  -3   5  -4    1.51    0.05
  -1   5  -4   11.40    0.16
   1   5  -4   98.65    1.52
   3   5  -4   80.79    1.23
   5   5  -4   47.51    0.74
   7   5  -4   20.84    0.28
   9   5  -4    0.40    0.06
  11   5  -4    2.65    0.11
  13   5  -4    2.98    0.14
  15   5  -4   33.96    0.48
  17   5  -4    0.32    0.12
  19   5  -4    1.73    0.19
 -16   6  -4    3.88    0.29
 -14   6  -4   20.11    0.38
 -12   6  -4   91.76    1.17
 -10   6  -4   98.00    1.24
  -8   6  -4  188.86    2.35
  -6   6  -4  282.68    4.35
  -4   6  -4  153.96    2.35
  -2   6  -4    1.11    0.07
   0   6  -4    4.41    0.10
   2   6  -4   94.69    1.18
   4   6  -4    0.35    0.04
   6   6  -4   55.86    0.87
   8   6  -4  112.02    1.41
  10   6  -4  112.94    1.41
  12   6  -4  263.74    3.26
  14   6  -4   58.43    0.76
  16   6  -4   18.15    0.30
  18   6  -4   22.88    0.48
 -15   7  -4    5.96    0.31
 -13   7  -4    1.52    0.13
 -11   7  -4    0.96    0.07
  -9   7  -4   31.81    0.42
  -7   7  -4   41.71    0.53
  -5   7  -4   80.41    1.24
  -3   7  -4  254.09    3.86
  -1   7  -4   47.01    0.73
   1   7  -4    0.84    0.06
   3   7  -4   31.41    0.41
   5   7  -4    2.33    0.08
   7   7  -4   22.21    0.37
   9   7  -4    1.16    0.09
  11   7  -4   35.04    0.47
  13   7  -4    0.12    0.09
  15   7  -4    5.63    0.17
  17   7  -4    2.11    0.20
 -16   8  -4   14.90    0.48
 -14   8  -4    6.44    0.32
 -12   8  -4   88.26    1.39
 -10   8  -4   94.16    1.18
  -8   8  -4   88.69    1.11
  -6   8  -4   20.72    0.28
  -4   8  -4   58.19    0.90
  -2   8  -4   77.44    0.98
   0   8  -4    2.42    0.07
   2   8  -4    0.66    0.06
   4   8  -4  105.11    1.31
   6   8  -4   33.81    0.44
   8   8  -4   94.99    1.47
  10   8  -4   45.62    0.60
  12   8  -4   54.95    0.72
  14   8  -4   16.14    0.27
  16   8  -4   16.50    0.38
  18   8  -4    5.68    0.42
 -17   9  -4    0.75    0.24
 -15   9  -4    0.41    0.20
 -13   9  -4   21.32    0.57
 -11   9  -4    2.09    0.15
  -9   9  -4   33.14    0.44
  -7   9  -4   39.56    0.51
  -5   9  -4   25.99    0.34
  -3   9  -4    4.80    0.13
  -1   9  -4    1.78    0.07
   1   9  -4    0.11    0.05
   3   9  -4    3.32    0.09
   5   9  -4   76.59    0.96
   7   9  -4    7.84    0.15
   9   9  -4    3.58    0.12
  11   9  -4   21.42    0.32
  13   9  -4   12.95    0.23
  15   9  -4    0.85    0.16
  17   9  -4   20.94    0.45
 -16  10  -4    4.65    0.35
 -14  10  -4    8.73    0.37
 -12  10  -4    2.93    0.27
 -10  10  -4   63.16    1.13
  -8  10  -4   92.74    1.19
  -6  10  -4   46.14    0.58
  -4  10  -4   19.16    0.26
  -2  10  -4   24.63    0.33
   0  10  -4    2.93    0.09
   2  10  -4    4.12    0.11
   4  10  -4    8.55    0.15
   6  10  -4   59.69    0.76
   8  10  -4   72.64    0.93
  10  10  -4   41.92    0.56
  12  10  -4   31.45    0.44
  14  10  -4   22.07    0.45
  16  10  -4   11.51    0.33
 -15  11  -4    9.38    0.40
 -13  11  -4   18.82    0.54
 -11  11  -4   21.50    0.56
  -9  11  -4   84.91    1.84
  -7  11  -4   36.16    0.47
  -5  11  -4   49.67    0.64
  -3  11  -4   24.65    0.33
  -1  11  -4  112.26    1.39
   1  11  -4    0.35    0.06
   3  11  -4    3.13    0.10
   5  11  -4   16.68    0.25
   7  11  -4   17.26    0.26
   9  11  -4   10.68    0.20
  11  11  -4   35.38    0.49
  13  11  -4   24.23    0.48
  15  11  -4   26.49    0.53
 -16  12  -4    4.21    0.37
 -14  12  -4    3.07    0.33
 -12  12  -4   10.51    0.39
 -10  12  -4   37.43    0.87
  -8  12  -4   21.27    0.55
  -6  12  -4   42.04    0.68
  -4  12  -4   26.49    0.36
  -2  12  -4    0.17    0.06
   0  12  -4    6.89    0.14
   2  12  -4    3.10    0.11
   4  12  -4   51.32    0.66
   6  12  -4    9.42    0.18
   8  12  -4    1.66    0.11
  10  12  -4   32.09    0.45
  12  12  -4   22.83    0.45
  14  12  -4   14.52    0.36
  16  12  -4    8.98    0.32
 -15  13  -4   15.00    0.52
 -13  13  -4   30.18    0.77
 -11  13  -4   21.44    0.59
  -9  13  -4   25.84    0.64
  -7  13  -4   34.49    0.81
  -5  13  -4   47.45    0.76
  -3  13  -4   22.93    0.32
  -1  13  -4    0.55    0.07
   1  13  -4   28.09    0.38
   3  13  -4    5.84    0.14
   5  13  -4   51.08    0.66
   7  13  -4   46.03    0.61
   9  13  -4   15.71    0.26
  11  13  -4   46.43    0.81
  13  13  -4   15.02    0.36
  15  13  -4    1.67    0.20
 -14  14  -4    2.80    0.35
 -12  14  -4    5.53    0.34
 -10  14  -4   32.14    0.79
  -8  14  -4   10.15    0.37
  -6  14  -4   72.29    1.58
  -4  14  -4   26.14    0.45
  -2  14  -4    3.34    0.12
   0  14  -4    9.57    0.18
   2  14  -4    7.97    0.17
   4  14  -4   34.20    0.46
   6  14  -4   31.30    0.43
   8  14  -4    4.58    0.15
  10  14  -4   26.35    0.50
  12  14  -4    5.90    0.26
  14  14  -4   24.37    0.51
 -13  15  -4   21.48    0.62
 -11  15  -4   28.78    0.74
  -9  15  -4   32.47    0.80
  -7  15  -4    5.74    0.31
  -5  15  -4   28.15    0.68
  -3  15  -4   15.12    0.30
  -1  15  -4    8.79    0.17
   1  15  -4   22.48    0.32
   3  15  -4   10.01    0.19
   5  15  -4   18.22    0.29
   7  15  -4   30.71    0.43
   9  15  -4   12.16    0.31
  11  15  -4   60.88    1.02
  13  15  -4   26.94    0.54
 -12  16  -4    1.60    0.26
 -10  16  -4    4.16    0.35
  -8  16  -4    8.45    0.37
  -6  16  -4    2.49    0.27
  -4  16  -4    5.12    0.29
  -2  16  -4    2.60    0.17
   0  16  -4    3.69    0.14
   2  16  -4    1.64    0.11
   4  16  -4    1.63    0.13
   6  16  -4   18.97    0.30
   8  16  -4    4.25    0.23
  10  16  -4    8.60    0.29
  12  16  -4    9.38    0.45
 -11  17  -4    5.47    0.38
  -9  17  -4   63.32    1.47
  -7  17  -4    1.09    0.22
  -5  17  -4    7.87    0.34
  -3  17  -4   13.41    0.42
  -1  17  -4    2.11    0.24
   1  17  -4    0.66    0.10
   3  17  -4    1.85    0.12
   5  17  -4    2.33    0.15
   7  17  -4   27.66    0.52
   9  17  -4   26.81    0.74
  11  17  -4   24.81    0.71
  -8  18  -4    1.44    0.25
  -6  18  -4    0.49    0.22
  -4  18  -4    0.21    0.20
  -2  18  -4    2.43    0.27
   0  18  -4    1.54    0.20
   2  18  -4    0.60    0.11
   4  18  -4    1.05    0.12
   6  18  -4    2.62    0.22
   8  18  -4    7.59    0.28
  10  18  -4    5.44    0.40
  -7  19  -4    4.64    0.36
  -5  19  -4   30.10    0.76
  -3  19  -4    6.40    0.34
  -1  19  -4    2.40    0.29
   1  19  -4    9.62    0.36
   3  19  -4    4.58    0.22
   5  19  -4   11.34    0.31
   7  19  -4   20.26    0.43
  -4  20  -4    0.73    0.23
  -2  20  -4    5.64    0.34
   0  20  -4    0.43    0.21
   2  20  -4    0.95    0.21
  -4 -20  -3   22.49    0.63
  -2 -20  -3    3.79    0.33
   0 -20  -3    9.29    0.42
   2 -20  -3   -0.11    0.23
   4 -20  -3    0.18    0.24
  -7 -19  -3    2.95    0.30
  -5 -19  -3    0.15    0.23
  -3 -19  -3   -0.20    0.21
  -1 -19  -3    1.45    0.23
   1 -19  -3    0.05    0.22
   3 -19  -3    0.22    0.22
   5 -19  -3    0.49    0.24
   7 -19  -3    5.21    0.37
  -6 -18  -3    5.29    0.32
  -4 -18  -3   42.40    0.96
  -2 -18  -3    6.65    0.33
   0 -18  -3    6.28    0.34
   2 -18  -3    0.18    0.21
   4 -18  -3    0.23    0.21
   6 -18  -3    6.93    0.37
   8 -18  -3   19.05    0.56
  -7 -17  -3    8.86    0.36
  -5 -17  -3    8.41    0.34
  -3 -17  -3    0.11    0.19
  -1 -17  -3    2.97    0.29
   1 -17  -3    0.18    0.19
   3 -17  -3    0.16    0.19
   5 -17  -3    1.19    0.21
   7 -17  -3    0.70    0.22
   9 -17  -3    2.90    0.33
  11 -17  -3    1.47    0.26
  -8 -16  -3    9.52    0.34
  -6 -16  -3   14.32    0.42
  -4 -16  -3   54.12    1.18
  -2 -16  -3   32.23    0.75
   0 -16  -3   10.61    0.37
   2 -16  -3    3.71    0.27
   4 -16  -3    1.07    0.20
   6 -16  -3   13.31    0.43
   8 -16  -3    6.99    0.34
  10 -16  -3   15.04    0.48
  -9 -15  -3   13.65    0.40
  -7 -15  -3    0.56    0.17
  -5 -15  -3   44.14    0.98
  -3 -15  -3   17.97    0.47
  -1 -15  -3   16.13    0.44
   1 -15  -3    2.34    0.24
   3 -15  -3    5.49    0.29
   5 -15  -3    4.36    0.28
   7 -15  -3    3.94    0.28
   9 -15  -3    0.65    0.20
  11 -15  -3    6.87    0.37
  13 -15  -3   12.94    0.47
 -10 -14  -3   19.45    0.48
  -8 -14  -3    3.38    0.23
  -6 -14  -3   94.85    1.98
  -4 -14  -3   58.37    1.26
  -2 -14  -3   37.71    0.83
   0 -14  -3   31.31    0.74
   2 -14  -3   37.54    0.85
   4 -14  -3    2.89    0.25
   6 -14  -3    0.28    0.17
   8 -14  -3   10.85    0.37
  10 -14  -3   19.22    0.53
  12 -14  -3   13.08    0.44
  14 -14  -3   20.96    0.59
  -9 -13  -3    3.09    0.21
  -7 -13  -3   39.23    0.86
  -5 -13  -3   48.81    1.06
  -3 -13  -3   17.55    0.43
  -1 -13  -3    2.37    0.20
   1 -13  -3   28.52    0.68
   3 -13  -3   38.66    0.87
   5 -13  -3   28.99    0.69
   7 -13  -3    0.42    0.17
   9 -13  -3   18.72    0.50
  11 -13  -3   34.61    0.81
  13 -13  -3   14.81    0.47
  15 -13  -3   19.04    0.41
 -10 -12  -3   46.24    1.00
  -8 -12  -3   44.72    0.98
  -6 -12  -3   83.59    1.75
  -4 -12  -3   47.98    1.02
  -2 -12  -3   50.18    1.07
   0 -12  -3    1.46    0.15
   2 -12  -3   39.52    0.87
   4 -12  -3    1.11    0.15
   6 -12  -3   17.80    0.44
   8 -12  -3    8.23    0.30
  10 -12  -3   43.76    0.97
  12 -12  -3   42.40    0.93
  14 -12  -3   21.50    0.42
  16 -12  -3   18.86    0.40
 -11 -11  -3   30.60    0.68
  -9 -11  -3   18.83    0.46
  -7 -11  -3   79.32    1.66
  -5 -11  -3   50.68    1.08
  -3 -11  -3   90.00    1.84
  -1 -11  -3    2.16    0.17
   1 -11  -3    8.91    0.27
   3 -11  -3    4.04    0.20
   5 -11  -3    0.04    0.12
   7 -11  -3   35.49    0.78
   9 -11  -3   18.51    0.47
  11 -11  -3   15.97    0.44
  13 -11  -3   20.42    0.52
  15 -11  -3   16.18    0.35
 -10 -10  -3   25.71    0.58
  -8 -10  -3   26.13    0.59
  -6 -10  -3  105.42    2.18
  -4 -10  -3   54.19    1.15
  -2 -10  -3   75.31    1.56
   0 -10  -3    1.78    0.15
   2 -10  -3    8.64    0.26
   4 -10  -3    2.98    0.17
   6 -10  -3    1.02    0.14
   8 -10  -3    1.78    0.19
  10 -10  -3    4.10    0.24
  12 -10  -3    9.74    0.33
  14 -10  -3   47.55    0.77
  16 -10  -3   14.30    0.34
 -11  -9  -3   91.96    1.89
  -9  -9  -3   45.34    0.96
  -7  -9  -3   39.99    0.85
  -5  -9  -3   55.33    1.17
  -3  -9  -3  148.14    2.98
  -1  -9  -3   51.24    1.07
   1  -9  -3    2.00    0.14
   3  -9  -3    0.65    0.10
   5  -9  -3    6.41    0.21
   7  -9  -3  110.59    2.25
   9  -9  -3  127.87    2.62
  11  -9  -3   50.06    1.07
  13  -9  -3   42.45    0.68
  15  -9  -3   28.53    0.51
  17  -9  -3   15.72    0.36
 -12  -8  -3   28.99    0.64
 -10  -8  -3    5.32    0.20
  -8  -8  -3   12.55    0.31
  -6  -8  -3   60.21    1.25
  -4  -8  -3   62.20    1.28
  -2  -8  -3  114.33    2.34
   0  -8  -3    2.44    0.13
   2  -8  -3    7.58    0.21
   4  -8  -3    4.83    0.18
   6  -8  -3   58.91    1.22
   8  -8  -3    9.50    0.27
  10  -8  -3   15.69    0.39
  12  -8  -3   12.35    0.26
  14  -8  -3   32.87    0.55
  16  -8  -3    3.73    0.28
  18  -8  -3   17.06    0.58
 -13  -7  -3    8.73    0.27
 -11  -7  -3   53.18    1.08
  -9  -7  -3   60.94    1.24
  -7  -7  -3  138.82    2.81
  -5  -7  -3   57.38    1.20
  -3  -7  -3  276.94    5.60
  -1  -7  -3   35.56    0.73
   1  -7  -3  123.42    2.60
   3  -7  -3    8.32    0.23
   5  -7  -3   17.99    0.41
   7  -7  -3    4.49    0.18
   9  -7  -3   82.82    1.72
  11  -7  -3   96.25    1.42
  13  -7  -3   37.32    0.59
  15  -7  -3    6.86    0.22
  17  -7  -3   94.15    2.09
 -12  -6  -3    8.30    0.25
 -10  -6  -3   27.40    0.59
  -8  -6  -3    5.22    0.17
  -6  -6  -3    8.25    0.21
  -4  -6  -3  124.82    2.52
  -2  -6  -3  110.79    2.22
   0  -6  -3   41.79    0.87
   2  -6  -3   14.92    0.34
   4  -6  -3    0.70    0.08
   6  -6  -3   30.77    0.66
   8  -6  -3    5.10    0.18
  10  -6  -3   23.66    0.31
  12  -6  -3    2.38    0.15
  14  -6  -3    1.80    0.14
  16  -6  -3   11.21    0.29
  18  -6  -3    4.54    0.37
 -13  -5  -3   18.87    0.44
 -11  -5  -3  167.14    3.31
  -9  -5  -3  102.39    2.07
  -7  -5  -3  301.80    6.02
  -5  -5  -3  407.30    8.12
  -3  -5  -3  548.06   11.03
  -1  -5  -3   99.35    2.00
   1  -5  -3  154.16    3.16
   3  -5  -3   46.06    0.94
   5  -5  -3    0.77    0.08
   7  -5  -3   82.20    1.20
   9  -5  -3   55.29    0.68
  11  -5  -3  107.52    1.30
  13  -5  -3   66.83    1.40
  15  -5  -3   47.91    0.75
  17  -5  -3   74.43    1.60
 -14  -4  -3    1.16    0.13
 -12  -4  -3    5.78    0.20
 -10  -4  -3   34.94    0.74
  -8  -4  -3   11.02    0.27
  -6  -4  -3    7.63    0.19
  -4  -4  -3  393.50    7.85
  -2  -4  -3  102.40    1.51
   0  -4  -3  213.29    3.16
   2  -4  -3    0.33    0.05
   4  -4  -3    1.53    0.08
   6  -4  -3    3.49    0.08
   8  -4  -3    1.39    0.06
  10  -4  -3    9.97    0.16
  12  -4  -3    2.81    0.12
  14  -4  -3   11.35    0.24
  16  -4  -3   10.31    0.40
  18  -4  -3    1.49    0.25
 -15  -3  -3    7.06    0.25
 -13  -3  -3   23.70    0.52
 -11  -3  -3  125.41    2.53
  -9  -3  -3   65.19    1.36
  -7  -3  -3  245.12    5.03
  -5  -3  -3   87.10    1.73
  -3  -3  -3  359.37    5.36
  -1  -3  -3  193.24    2.81
   1  -3  -3  140.00    2.05
   3  -3  -3   12.57    0.28
   5  -3  -3    0.31    0.03
   7  -3  -3   13.19    0.18
   9  -3  -3  165.81    2.00
  11  -3  -3   92.33    1.12
  13  -3  -3  139.91    1.70
  15  -3  -3   59.54    0.91
  17  -3  -3   48.89    1.10
  19  -3  -3   11.13    0.45
 -14  -2  -3    2.44    0.18
 -12  -2  -3    1.35    0.15
 -10  -2  -3    2.38    0.13
  -8  -2  -3    2.04    0.12
  -6  -2  -3   22.53    0.49
  -4  -2  -3   13.70    0.31
  -2  -2  -3   25.41    0.38
   0  -2  -3  509.61    6.08
   2  -2  -3    0.41    0.03
   4  -2  -3   61.33    0.73
   6  -2  -3   11.38    0.15
   8  -2  -3    0.87    0.06
  10  -2  -3   52.94    0.65
  12  -2  -3    0.19    0.06
  14  -2  -3    0.86    0.08
  16  -2  -3    1.23    0.13
  18  -2  -3    5.67    0.34
 -15  -1  -3    0.83    0.13
 -13  -1  -3   10.71    0.29
 -11  -1  -3  263.47    5.32
  -9  -1  -3  224.56    3.31
  -7  -1  -3  187.80    2.26
  -5  -1  -3  924.03   13.34
  -3  -1  -3   30.36    0.44
  -1  -1  -3   27.52    0.34
   1  -1  -3    9.69    0.14
   3  -1  -3  572.61    6.82
   5  -1  -3   15.91    0.20
   7  -1  -3    4.09    0.07
   9  -1  -3  226.63    2.71
  11  -1  -3   98.96    1.20
  13  -1  -3  149.13    1.79
  15  -1  -3   81.14    1.23
  17  -1  -3   52.43    0.82
  19  -1  -3    6.84    0.28
 -14   0  -3   -0.09    0.12
 -12   0  -3   -0.02    0.10
 -10   0  -3    0.05    0.06
  -8   0  -3   -0.04    0.04
  -6   0  -3   -0.02    0.04
  -4   0  -3    0.03    0.02
  -2   0  -3   -0.23    0.08
   0   0  -3   -0.01    0.01
   2   0  -3   -0.62    0.18
   4   0  -3    0.00    0.02
   6   0  -3   -0.08    0.03
   8   0  -3    0.06    0.04
  10   0  -3   -0.02    0.05
  12   0  -3    0.07    0.06
  14   0  -3    0.06    0.10
  16   0  -3   -0.15    0.12
  18   0  -3   -0.15    0.12
 -13   1  -3   11.13    0.29
 -11   1  -3  260.89    5.32
  -9   1  -3  225.69    2.38
  -7   1  -3  189.32    1.99
  -5   1  -3  923.65   11.21
  -3   1  -3   29.84    0.37
  -1   1  -3   28.66    0.34
   1   1  -3    9.69    0.12
   3   1  -3  553.93   11.83
   5   1  -3   15.29    0.20
   7   1  -3    3.96    0.07
   9   1  -3  227.16    3.36
  11   1  -3   99.81    1.25
  13   1  -3  150.74    2.23
  15   1  -3   82.15    1.23
  17   1  -3   51.43    0.71
  19   1  -3    7.03    0.22
 -12   2  -3    1.38    0.10
 -10   2  -3    2.01    0.07
  -8   2  -3    2.07    0.06
  -6   2  -3   23.30    0.30
  -4   2  -3   14.25    0.16
  -2   2  -3   25.46    0.31
   0   2  -3  509.76    5.70
   2   2  -3    0.29    0.05
   4   2  -3   60.13    0.91
   6   2  -3   11.26    0.19
   8   2  -3    0.78    0.04
  10   2  -3   52.94    0.81
  12   2  -3    0.13    0.09
  14   2  -3    0.89    0.09
  16   2  -3    1.26    0.11
  18   2  -3    5.91    0.20
 -13   3  -3   22.49    0.40
 -11   3  -3  123.61    1.55
  -9   3  -3   65.30    0.83
  -7   3  -3  251.33    3.02
  -5   3  -3   84.91    0.90
  -3   3  -3  363.34    3.85
  -1   3  -3  192.89    2.37
   1   3  -3  139.24    1.72
   3   3  -3   12.70    0.21
   5   3  -3    0.30    0.04
   7   3  -3   13.16    0.23
   9   3  -3  165.42    2.48
  11   3  -3   93.24    1.17
  13   3  -3  142.58    1.76
  15   3  -3   57.68    0.76
  17   3  -3   47.31    0.64
  19   3  -3   11.22    0.32
 -14   4  -3    1.01    0.12
 -12   4  -3    5.63    0.13
 -10   4  -3   34.98    0.46
  -8   4  -3   11.43    0.17
  -6   4  -3    7.47    0.15
  -4   4  -3  384.86    4.79
  -2   4  -3  104.77    1.59
   0   4  -3  215.30    2.66
   2   4  -3    0.24    0.04
   4   4  -3    1.32    0.06
   6   4  -3    3.52    0.09
   8   4  -3    1.50    0.07
  10   4  -3   10.00    0.17
  12   4  -3    2.84    0.12
  14   4  -3   11.26    0.21
  16   4  -3   10.70    0.22
  18   4  -3    1.76    0.18
 -15   5  -3    6.70    0.30
 -13   5  -3   18.41    0.35
 -11   5  -3  162.10    2.03
  -9   5  -3  100.63    1.27
  -7   5  -3  292.27    4.53
  -5   5  -3  392.96    4.96
  -3   5  -3  545.68    8.07
  -1   5  -3   97.58    1.22
   1   5  -3  158.35    1.93
   3   5  -3   45.35    0.70
   5   5  -3    0.63    0.06
   7   5  -3   81.00    1.02
   9   5  -3   54.67    0.71
  11   5  -3  107.46    1.35
  13   5  -3   67.66    0.87
  15   5  -3   48.01    0.64
  17   5  -3   72.04    1.19
  19   5  -3   18.97    0.44
 -16   6  -3    2.58    0.27
 -14   6  -3    1.17    0.12
 -12   6  -3    8.08    0.16
 -10   6  -3   27.04    0.36
  -8   6  -3    4.56    0.10
  -6   6  -3    7.97    0.16
  -4   6  -3  123.46    1.54
  -2   6  -3  107.48    1.36
   0   6  -3   42.34    0.65
   2   6  -3   15.01    0.25
   4   6  -3    0.77    0.05
   6   6  -3   30.67    0.49
   8   6  -3    5.18    0.11
  10   6  -3   23.68    0.33
  12   6  -3    2.43    0.13
  14   6  -3    2.14    0.13
  16   6  -3   10.96    0.30
  18   6  -3    4.14    0.26
 -15   7  -3    3.58    0.19
 -13   7  -3    8.22    0.22
 -11   7  -3   50.70    0.66
  -9   7  -3   59.68    0.76
  -7   7  -3  137.68    2.11
  -5   7  -3   57.75    0.90
  -3   7  -3  274.28    3.40
  -1   7  -3   34.12    0.54
   1   7  -3  129.92    1.95
   3   7  -3    8.64    0.13
   5   7  -3   17.63    0.24
   7   7  -3    5.00    0.13
   9   7  -3   83.27    1.29
  11   7  -3   95.02    1.21
  13   7  -3   37.21    0.50
  15   7  -3    7.33    0.25
  17   7  -3   95.67    2.14
 -16   8  -3    0.16    0.21
 -14   8  -3    4.47    0.20
 -12   8  -3   28.86    0.50
 -10   8  -3    5.07    0.12
  -8   8  -3   12.48    0.19
  -6   8  -3   60.14    0.94
  -4   8  -3   62.14    0.96
  -2   8  -3  113.56    1.76
   0   8  -3    2.14    0.08
   2   8  -3    7.75    0.12
   4   8  -3    4.73    0.10
   6   8  -3   58.50    0.74
   8   8  -3    9.32    0.19
  10   8  -3   15.57    0.24
  12   8  -3   12.13    0.21
  14   8  -3   33.44    0.59
  16   8  -3    3.84    0.24
  18   8  -3   18.15    0.42
 -17   9  -3    0.62    0.24
 -15   9  -3    4.40    0.32
 -13   9  -3    2.74    0.18
 -11   9  -3   92.12    1.45
  -9   9  -3   45.13    0.59
  -7   9  -3   40.38    0.64
  -5   9  -3   56.41    0.88
  -3   9  -3  143.97    2.23
  -1   9  -3   50.79    0.65
   1   9  -3    2.07    0.07
   3   9  -3    0.57    0.05
   5   9  -3    5.93    0.12
   7   9  -3  109.05    1.37
   9   9  -3  127.44    1.60
  11   9  -3   50.02    0.66
  13   9  -3   43.23    0.74
  15   9  -3   28.74    0.54
  17   9  -3   15.69    0.39
 -16  10  -3    2.62    0.26
 -14  10  -3    0.17    0.20
 -12  10  -3   25.18    0.63
 -10  10  -3   25.67    0.45
  -8  10  -3   26.64    0.45
  -6  10  -3  108.59    1.64
  -4  10  -3   54.84    0.86
  -2  10  -3   74.63    0.95
   0  10  -3    1.96    0.09
   2  10  -3    9.27    0.15
   4  10  -3    2.60    0.09
   6  10  -3    1.13    0.08
   8  10  -3    1.61    0.09
  10  10  -3    4.16    0.13
  12  10  -3    9.50    0.26
  14  10  -3   48.05    0.82
  16  10  -3   15.03    0.37
 -15  11  -3    1.65    0.24
 -13  11  -3    1.52    0.22
 -11  11  -3   29.30    0.73
  -9  11  -3   19.56    0.36
  -7  11  -3   81.30    1.25
  -5  11  -3   50.87    0.65
  -3  11  -3   87.91    1.34
  -1  11  -3    2.05    0.09
   1  11  -3    9.07    0.15
   3  11  -3    4.50    0.11
   5  11  -3    0.20    0.07
   7  11  -3   35.49    0.47
   9  11  -3   18.64    0.28
  11  11  -3   16.11    0.34
  13  11  -3   18.96    0.40
  15  11  -3   15.92    0.38
  17  11  -3   12.74    0.51
 -16  12  -3    4.30    0.37
 -14  12  -3    7.99    0.38
 -12  12  -3    7.28    0.34
 -10  12  -3   45.78    1.05
  -8  12  -3   45.45    0.74
  -6  12  -3   85.22    1.31
  -4  12  -3   48.21    0.62
  -2  12  -3   49.76    0.64
   0  12  -3    1.32    0.09
   2  12  -3   40.84    0.52
   4  12  -3    1.15    0.08
   6  12  -3   17.37    0.26
   8  12  -3    8.24    0.17
  10  12  -3   43.89    0.74
  12  12  -3   40.28    0.71
  14  12  -3   21.79    0.45
  16  12  -3   18.61    0.44
 -15  13  -3    1.27    0.25
 -13  13  -3    3.58    0.32
 -11  13  -3   26.24    0.68
  -9  13  -3    3.12    0.27
  -7  13  -3   40.26    0.65
  -5  13  -3   50.26    0.80
  -3  13  -3   16.97    0.25
  -1  13  -3    2.52    0.10
   1  13  -3   30.27    0.40
   3  13  -3   39.88    0.52
   5  13  -3   30.36    0.41
   7  13  -3    0.54    0.09
   9  13  -3   18.60    0.30
  11  13  -3   34.42    0.62
  13  13  -3   15.03    0.36
  15  13  -3   19.01    0.44
 -14  14  -3    3.29    0.35
 -12  14  -3   30.92    0.79
 -10  14  -3   17.42    0.52
  -8  14  -3    3.85    0.28
  -6  14  -3   93.38    2.03
  -4  14  -3   59.32    0.94
  -2  14  -3   37.48    0.50
   0  14  -3   32.52    0.44
   2  14  -3   38.44    0.51
   4  14  -3    2.94    0.13
   6  14  -3    0.19    0.09
   8  14  -3    9.95    0.21
  10  14  -3   19.24    0.40
  12  14  -3   13.10    0.34
  14  14  -3   20.24    0.45
 -13  15  -3    2.88    0.35
 -11  15  -3    1.46    0.23
  -9  15  -3   14.11    0.46
  -7  15  -3    0.56    0.19
  -5  15  -3   44.78    0.73
  -3  15  -3   17.65    0.34
  -1  15  -3   16.12    0.25
   1  15  -3    2.42    0.12
   3  15  -3    6.21    0.16
   5  15  -3    4.65    0.15
   7  15  -3    3.69    0.15
   9  15  -3    0.90    0.15
  11  15  -3    7.22    0.27
  13  15  -3   13.60    0.52
 -12  16  -3   10.82    0.44
 -10  16  -3   56.81    1.29
  -8  16  -3    9.94    0.39
  -6  16  -3   14.43    0.45
  -4  16  -3   55.16    1.21
  -2  16  -3   32.23    0.55
   0  16  -3   11.31    0.20
   2  16  -3    4.00    0.15
   4  16  -3    1.16    0.10
   6  16  -3   13.85    0.25
   8  16  -3    6.84    0.25
  10  16  -3   15.50    0.37
  12  16  -3   11.88    0.35
 -11  17  -3    0.14    0.24
  -9  17  -3   10.97    0.43
  -7  17  -3    9.83    0.39
  -5  17  -3    8.02    0.35
  -3  17  -3    0.28    0.18
  -1  17  -3    3.36    0.18
   1  17  -3    0.11    0.10
   3  17  -3    0.30    0.10
   5  17  -3    1.14    0.11
   7  17  -3    0.92    0.16
   9  17  -3    3.56    0.24
  11  17  -3    1.48    0.19
 -10  18  -3   13.77    0.50
  -8  18  -3    9.02    0.42
  -6  18  -3    5.49    0.34
  -4  18  -3   42.09    0.98
  -2  18  -3    7.11    0.32
   0  18  -3    6.74    0.23
   2  18  -3    0.52    0.13
   4  18  -3    0.22    0.14
   6  18  -3    7.23    0.26
   8  18  -3   18.98    0.41
  10  18  -3   31.29    0.60
  -7  19  -3    2.08    0.26
  -5  19  -3    0.36    0.22
  -3  19  -3   -0.02    0.20
  -1  19  -3    1.67    0.21
   1  19  -3    0.12    0.14
   3  19  -3    0.47    0.23
   5  19  -3    0.79    0.17
   7  19  -3    5.47    0.28
  -4  20  -3   24.32    0.65
  -2  20  -3    4.36    0.32
   0  20  -3   10.61    0.38
   4  20  -3    0.06    0.25
   6  20  -3    7.22    0.40
  -4 -20  -2    1.28    0.24
  -2 -20  -2    4.30    0.33
   0 -20  -2    3.18    0.33
   2 -20  -2    0.30    0.23
   4 -20  -2    0.37    0.24
  -5 -19  -2   34.61    0.82
  -3 -19  -2   10.17    0.38
  -1 -19  -2   27.95    0.72
   1 -19  -2   12.39    0.45
   3 -19  -2    1.25    0.23
   5 -19  -2   -0.08    0.22
   7 -19  -2    0.35    0.25
  -6 -18  -2   31.29    0.73
  -4 -18  -2   13.22    0.42
  -2 -18  -2    3.82    0.30
   0 -18  -2    3.48    0.30
   2 -18  -2    0.47    0.21
   4 -18  -2    1.79    0.23
   6 -18  -2    0.37    0.23
   8 -18  -2    0.12    0.23
  10 -18  -2    0.61    0.26
  -7 -17  -2   12.09    0.39
  -5 -17  -2   96.87    2.03
  -3 -17  -2   26.04    0.63
  -1 -17  -2   42.37    0.98
   1 -17  -2   16.44    0.48
   3 -17  -2    7.05    0.33
   5 -17  -2    4.15    0.32
   7 -17  -2    0.84    0.22
   9 -17  -2    0.34    0.23
  -8 -16  -2    6.76    0.30
  -6 -16  -2    0.28    0.18
  -4 -16  -2   22.61    0.56
  -2 -16  -2   13.74    0.41
   0 -16  -2   11.10    0.38
   2 -16  -2    7.21    0.31
   4 -16  -2   20.33    0.54
   6 -16  -2    0.57    0.19
   8 -16  -2    1.01    0.21
  10 -16  -2    0.14    0.23
  12 -16  -2    0.32    0.24
  -9 -15  -2    9.73    0.33
  -7 -15  -2   19.87    0.50
  -5 -15  -2  142.25    2.95
  -3 -15  -2   23.16    0.56
  -1 -15  -2   78.68    1.66
   1 -15  -2   24.76    0.61
   3 -15  -2    7.06    0.30
   5 -15  -2    1.79    0.20
   7 -15  -2    2.27    0.27
   9 -15  -2    3.06    0.29
  11 -15  -2    8.53    0.38
  13 -15  -2    7.84    0.39
  -8 -14  -2    5.76    0.25
  -6 -14  -2   14.81    0.40
  -4 -14  -2   34.35    0.78
  -2 -14  -2   22.62    0.55
   0 -14  -2   56.80    1.23
   2 -14  -2   20.35    0.52
   4 -14  -2    8.98    0.32
   6 -14  -2    8.38    0.31
   8 -14  -2    0.95    0.19
  10 -14  -2   15.06    0.45
  12 -14  -2   10.50    0.41
  14 -14  -2    8.36    0.41
  -9 -13  -2   18.15    0.45
  -7 -13  -2   49.20    1.06
  -5 -13  -2   42.48    0.92
  -3 -13  -2   42.18    0.91
  -1 -13  -2   37.75    0.83
   1 -13  -2   29.38    0.68
   3 -13  -2   21.13    0.53
   5 -13  -2    2.97    0.23
   7 -13  -2    7.96    0.31
   9 -13  -2    8.64    0.34
  11 -13  -2   13.24    0.43
  13 -13  -2   19.88    0.55
  15 -13  -2   13.16    0.34
 -10 -12  -2    7.69    0.26
  -8 -12  -2   21.84    0.51
  -6 -12  -2   63.32    1.31
  -4 -12  -2   28.52    0.63
  -2 -12  -2   60.27    1.27
   0 -12  -2   50.29    1.09
   2 -12  -2   90.93    1.90
   4 -12  -2    2.10    0.20
   6 -12  -2    9.00    0.30
   8 -12  -2    6.07    0.27
  10 -12  -2    4.43    0.27
  12 -12  -2   18.27    0.50
  14 -12  -2   17.18    0.50
  16 -12  -2   12.68    0.34
  -9 -11  -2   48.84    1.03
  -7 -11  -2   38.44    0.84
  -5 -11  -2   96.75    2.02
  -3 -11  -2   61.98    1.31
  -1 -11  -2   38.30    0.82
   1 -11  -2    1.00    0.13
   3 -11  -2    3.62    0.19
   5 -11  -2    6.56    0.24
   7 -11  -2    0.39    0.14
   9 -11  -2    4.28    0.25
  11 -11  -2   30.29    0.73
  13 -11  -2   56.13    1.23
  15 -11  -2   16.63    0.36
  17 -11  -2   28.92    0.53
 -10 -10  -2   63.60    1.31
  -8 -10  -2   12.52    0.32
  -6 -10  -2  112.90    2.34
  -4 -10  -2  126.73    2.57
  -2 -10  -2   42.13    0.90
   0 -10  -2   47.06    1.00
   2 -10  -2   59.63    1.25
   4 -10  -2   10.08    0.28
   6 -10  -2    0.45    0.12
   8 -10  -2   31.23    0.70
  10 -10  -2   29.96    0.68
  12 -10  -2   41.54    0.92
  14 -10  -2   26.63    0.48
  16 -10  -2   27.31    0.49
 -11  -9  -2    2.09    0.17
  -9  -9  -2    4.05    0.18
  -7  -9  -2   17.93    0.41
  -5  -9  -2   23.35    0.53
  -3  -9  -2   33.07    0.71
  -1  -9  -2    9.43    0.26
   1  -9  -2    1.74    0.14
   3  -9  -2    0.69    0.10
   5  -9  -2    1.36    0.15
   7  -9  -2    2.15    0.17
   9  -9  -2   26.90    0.61
  11  -9  -2   16.39    0.42
  13  -9  -2   38.96    0.88
  15  -9  -2   22.90    0.43
  17  -9  -2   17.70    0.38
 -12  -8  -2   14.97    0.36
 -10  -8  -2    8.67    0.24
  -8  -8  -2   75.35    1.54
  -6  -8  -2   95.73    1.95
  -4  -8  -2  110.14    2.28
  -2  -8  -2  224.39    4.52
   0  -8  -2  219.57    4.51
   2  -8  -2   89.87    1.84
   4  -8  -2    0.48    0.10
   6  -8  -2    0.08    0.10
   8  -8  -2    0.25    0.12
  10  -8  -2   39.35    0.86
  12  -8  -2  105.06    2.18
  14  -8  -2   43.91    0.71
  16  -8  -2   33.25    0.57
  18  -8  -2   22.65    0.66
 -11  -7  -2   19.88    0.45
  -9  -7  -2   27.42    0.58
  -7  -7  -2   12.65    0.30
  -5  -7  -2   32.05    0.66
  -3  -7  -2    1.59    0.10
  -1  -7  -2    6.02    0.16
   1  -7  -2  135.79    2.80
   3  -7  -2    5.88    0.18
   5  -7  -2   70.56    1.45
   7  -7  -2  111.59    2.31
   9  -7  -2    6.47    0.22
  11  -7  -2  116.48    2.37
  13  -7  -2   29.88    0.50
  15  -7  -2   30.74    0.52
  17  -7  -2    6.21    0.38
 -12  -6  -2    1.30    0.12
 -10  -6  -2   25.48    0.56
  -8  -6  -2  215.41    4.32
  -6  -6  -2  207.93    4.13
  -4  -6  -2  100.35    2.03
  -2  -6  -2  152.20    3.04
   0  -6  -2  193.89    3.98
   2  -6  -2  138.07    2.79
   4  -6  -2    2.77    0.13
   6  -6  -2   24.63    0.53
   8  -6  -2    1.93    0.07
  10  -6  -2   49.56    0.75
  12  -6  -2   71.20    1.07
  14  -6  -2    1.08    0.12
  16  -6  -2   55.38    0.87
  18  -6  -2   65.98    1.50
 -13  -5  -2    1.31    0.12
 -11  -5  -2   11.99    0.29
  -9  -5  -2    0.62    0.09
  -7  -5  -2    4.96    0.15
  -5  -5  -2   41.20    0.83
  -3  -5  -2   15.92    0.34
  -1  -5  -2   17.14    0.37
   1  -5  -2   12.47    0.29
   3  -5  -2   50.32    1.02
   5  -5  -2    2.72    0.12
   7  -5  -2   15.69    0.25
   9  -5  -2    3.20    0.09
  11  -5  -2   32.61    0.42
  13  -5  -2    0.58    0.10
  15  -5  -2   21.84    0.39
  17  -5  -2    0.17    0.23
  19  -5  -2   16.01    0.53
 -12  -4  -2   23.13    0.51
 -10  -4  -2   97.82    1.96
  -8  -4  -2  105.94    2.19
  -6  -4  -2  109.30    2.23
  -4  -4  -2   82.93    1.69
  -2  -4  -2  227.91    4.58
   0  -4  -2  982.46   19.83
   2  -4  -2   77.99    1.58
   4  -4  -2    6.11    0.16
   6  -4  -2    1.64    0.06
   8  -4  -2   21.42    0.34
  10  -4  -2   58.52    0.72
  12  -4  -2   93.37    1.13
  14  -4  -2   35.74    0.47
  16  -4  -2  128.82    2.68
  18  -4  -2   24.45    0.65
 -13  -3  -2    0.79    0.11
 -11  -3  -2    4.04    0.16
  -9  -3  -2   16.16    0.36
  -7  -3  -2    1.94    0.10
  -5  -3  -2   31.38    0.65
  -3  -3  -2   21.40    0.45
  -1  -3  -2  273.78    4.02
   1  -3  -2    0.12    0.04
   3  -3  -2  301.07    6.11
   5  -3  -2    6.17    0.11
   7  -3  -2   -0.06    0.04
   9  -3  -2    4.41    0.09
  11  -3  -2   18.96    0.26
  13  -3  -2    0.31    0.07
  15  -3  -2   18.94    0.28
  17  -3  -2    0.07    0.21
  19  -3  -2    5.04    0.37
 -14  -2  -2    3.13    0.18
 -12  -2  -2   81.71    1.66
 -10  -2  -2   57.38    1.17
  -8  -2  -2  395.36    8.00
  -6  -2  -2  136.07    2.79
  -4  -2  -2  345.07    7.05
  -2  -2  -2   16.21    0.25
   0  -2  -2   76.16    1.12
   2  -2  -2   20.53    0.44
   4  -2  -2    4.05    0.10
   6  -2  -2    3.55    0.07
   8  -2  -2   81.77    1.00
  10  -2  -2   91.83    1.11
  12  -2  -2  188.00    2.26
  14  -2  -2   81.16    1.00
  16  -2  -2   55.68    0.89
  18  -2  -2   19.79    0.56
 -15  -1  -2    0.21    0.12
 -13  -1  -2    0.47    0.11
 -11  -1  -2   17.33    0.39
  -9  -1  -2   11.05    0.26
  -7  -1  -2    1.12    0.06
  -5  -1  -2  136.27    2.81
  -3  -1  -2  622.28   12.89
  -1  -1  -2   -0.20    0.07
   1  -1  -2  287.31    4.12
   3  -1  -2    0.16    0.02
   5  -1  -2   17.47    0.22
   7  -1  -2   60.20    0.73
   9  -1  -2    0.04    0.04
  11  -1  -2   17.43    0.24
  13  -1  -2   10.50    0.17
  15  -1  -2    0.00    0.11
  17  -1  -2    0.09    0.13
  19  -1  -2    3.39    0.25
 -12   0  -2  124.48    2.54
 -10   0  -2  150.70    3.07
  -8   0  -2  350.69    4.31
  -6   0  -2  101.23    1.24
  -4   0  -2  953.07   14.11
  -2   0  -2  321.65    4.68
   0   0  -2  278.22    4.03
   2   0  -2    2.94    0.07
   4   0  -2    0.53    0.03
   6   0  -2   70.19    1.06
   8   0  -2   25.15    0.39
  10   0  -2   88.21    1.31
  12   0  -2  131.29    1.94
  14   0  -2  100.38    1.50
  16   0  -2  152.90    2.28
  18   0  -2   45.05    0.62
  20   0  -2   36.93    0.67
 -11   1  -2   16.68    0.29
  -9   1  -2   10.69    0.14
  -7   1  -2    0.97    0.05
  -5   1  -2  139.52    1.47
  -3   1  -2  640.52    6.72
  -1   1  -2   -0.16    0.05
   1   1  -2  275.03    4.06
   3   1  -2    0.10    0.02
   5   1  -2   17.26    0.28
   7   1  -2   60.51    0.91
   9   1  -2    0.06    0.04
  11   1  -2   17.60    0.30
  13   1  -2   10.53    0.17
  15   1  -2    0.12    0.10
  17   1  -2    0.23    0.11
  19   1  -2    3.11    0.19
 -14   2  -2    3.12    0.23
 -12   2  -2   76.58    1.85
 -10   2  -2   56.13    0.72
  -8   2  -2  397.76    4.18
  -6   2  -2  139.36    1.68
  -4   2  -2  345.96    3.68
  -2   2  -2   16.18    0.18
   0   2  -2   77.36    0.95
   2   2  -2   21.15    0.33
   4   2  -2    4.24    0.09
   6   2  -2    3.40    0.09
   8   2  -2   81.94    1.24
  10   2  -2   92.20    1.38
  12   2  -2  189.77    2.34
  14   2  -2   81.73    1.04
  16   2  -2   57.64    0.75
  18   2  -2   19.98    0.33
 -15   3  -2    2.35    0.24
 -13   3  -2    0.87    0.15
 -11   3  -2    3.91    0.14
  -9   3  -2   16.06    0.23
  -7   3  -2    2.02    0.08
  -5   3  -2   31.06    0.40
  -3   3  -2   20.77    0.27
  -1   3  -2  269.86    3.38
   1   3  -2    0.03    0.02
   3   3  -2  297.85    4.58
   5   3  -2    6.41    0.10
   7   3  -2   -0.01    0.04
   9   3  -2    4.45    0.10
  11   3  -2   19.07    0.27
  13   3  -2    0.29    0.08
  15   3  -2   19.83    0.30
  17   3  -2    0.05    0.11
  19   3  -2    5.21    0.27
 -16   4  -2    4.16    0.28
 -14   4  -2    0.41    0.16
 -12   4  -2   22.73    0.40
 -10   4  -2   95.43    1.21
  -8   4  -2  106.44    1.65
  -6   4  -2  108.79    1.36
  -4   4  -2   82.73    1.18
  -2   4  -2  223.42    2.79
   0   4  -2  986.13   14.88
   2   4  -2   77.46    0.97
   4   4  -2    6.18    0.12
   6   4  -2    1.58    0.06
   8   4  -2   21.63    0.29
  10   4  -2   58.53    0.75
  12   4  -2   93.50    1.18
  14   4  -2   36.03    0.49
  16   4  -2  124.54    1.59
  18   4  -2   24.16    0.48
 -17   5  -2    2.22    0.28
 -15   5  -2    3.48    0.26
 -13   5  -2    1.32    0.12
 -11   5  -2   11.52    0.19
  -9   5  -2    0.55    0.05
  -7   5  -2    4.50    0.12
  -5   5  -2   39.26    0.51
  -3   5  -2   15.39    0.20
  -1   5  -2   17.13    0.22
   1   5  -2   13.34    0.17
   3   5  -2   48.99    0.76
   5   5  -2    2.88    0.08
   7   5  -2   15.86    0.22
   9   5  -2    3.15    0.09
  11   5  -2   32.86    0.44
  13   5  -2    0.51    0.09
  15   5  -2   22.18    0.34
  17   5  -2    0.27    0.16
  19   5  -2   15.94    0.39
 -18   6  -2    8.12    0.38
 -16   6  -2    5.42    0.30
 -14   6  -2    0.51    0.12
 -12   6  -2    1.28    0.12
 -10   6  -2   25.48    0.35
  -8   6  -2  212.33    3.25
  -6   6  -2  201.65    2.53
  -4   6  -2   98.58    1.24
  -2   6  -2  148.78    1.85
   0   6  -2  201.27    2.44
   2   6  -2  138.75    2.10
   4   6  -2    2.87    0.07
   6   6  -2   24.13    0.35
   8   6  -2    1.68    0.08
  10   6  -2   49.99    0.64
  12   6  -2   72.02    0.91
  14   6  -2    1.35    0.10
  16   6  -2   55.61    0.93
  18   6  -2   67.89    1.54
 -17   7  -2    1.27    0.23
 -15   7  -2    3.74    0.20
 -13   7  -2   32.49    0.56
 -11   7  -2   19.63    0.28
  -9   7  -2   26.59    0.45
  -7   7  -2   12.15    0.23
  -5   7  -2   31.36    0.40
  -3   7  -2    1.05    0.05
  -1   7  -2    5.54    0.09
   1   7  -2  137.99    2.10
   3   7  -2    5.98    0.10
   5   7  -2   70.51    0.88
   7   7  -2  111.96    1.73
   9   7  -2    6.53    0.16
  11   7  -2  115.00    1.45
  13   7  -2   29.77    0.42
  15   7  -2   31.12    0.56
  17   7  -2    6.52    0.27
 -16   8  -2    1.28    0.16
 -14   8  -2    9.19    0.24
 -12   8  -2   14.16    0.29
 -10   8  -2    8.22    0.15
  -8   8  -2   73.22    1.16
  -6   8  -2   94.42    1.19
  -4   8  -2  111.86    1.39
  -2   8  -2  219.72    2.76
   0   8  -2  222.08    3.39
   2   8  -2   91.11    1.12
   4   8  -2    0.42    0.06
   6   8  -2    0.24    0.05
   8   8  -2    0.27    0.07
  10   8  -2   39.49    0.52
  12   8  -2  105.39    1.33
  14   8  -2   44.42    0.76
  16   8  -2   33.96    0.62
  18   8  -2   22.77    0.48
 -15   9  -2    2.47    0.30
 -13   9  -2    7.71    0.22
 -11   9  -2    2.27    0.15
  -9   9  -2    4.17    0.15
  -7   9  -2   17.66    0.31
  -5   9  -2   24.17    0.32
  -3   9  -2   32.82    0.53
  -1   9  -2    9.90    0.19
   1   9  -2    1.98    0.07
   3   9  -2    0.72    0.05
   5   9  -2    1.52    0.08
   7   9  -2    2.28    0.09
   9   9  -2   26.95    0.37
  11   9  -2   15.92    0.25
  13   9  -2   39.59    0.68
  15   9  -2   23.48    0.47
  17   9  -2   18.53    0.42
 -16  10  -2    0.64    0.23
 -14  10  -2    1.28    0.21
 -12  10  -2    4.69    0.19
 -10  10  -2   62.56    0.99
  -8  10  -2   12.85    0.29
  -6  10  -2  114.69    1.76
  -4  10  -2  125.19    1.93
  -2  10  -2   41.88    0.67
   0  10  -2   47.96    0.61
   2  10  -2   60.81    0.76
   4  10  -2   10.27    0.16
   6  10  -2    0.46    0.06
   8  10  -2   31.23    0.42
  10  10  -2   30.07    0.41
  12  10  -2   41.27    0.71
  14  10  -2   26.66    0.51
  16  10  -2   26.80    0.53
 -15  11  -2   -0.12    0.22
 -13  11  -2    1.24    0.21
 -11  11  -2    6.70    0.21
  -9  11  -2   48.64    0.78
  -7  11  -2   39.74    0.64
  -5  11  -2   98.30    1.52
  -3  11  -2   63.08    0.95
  -1  11  -2   37.92    0.49
   1  11  -2    0.96    0.06
   3  11  -2    3.91    0.10
   5  11  -2    6.74    0.13
   7  11  -2    0.08    0.07
   9  11  -2    3.94    0.13
  11  11  -2   30.49    0.56
  13  11  -2   55.34    0.94
  15  11  -2   16.43    0.39
  17  11  -2   28.26    0.57
 -16  12  -2    0.91    0.26
 -14  12  -2    0.23    0.21
 -12  12  -2    5.10    0.31
 -10  12  -2    7.49    0.22
  -8  12  -2   22.13    0.39
  -6  12  -2   62.38    0.99
  -4  12  -2   27.76    0.38
  -2  12  -2   60.26    0.77
   0  12  -2   51.77    0.66
   2  12  -2   92.52    1.16
   4  12  -2    1.92    0.10
   6  12  -2    9.22    0.17
   8  12  -2    6.07    0.15
  10  12  -2    4.44    0.20
  12  12  -2   17.92    0.38
  14  12  -2   17.00    0.39
  16  12  -2   12.86    0.36
 -15  13  -2    0.00    0.24
 -13  13  -2   -0.09    0.21
 -11  13  -2    0.33    0.19
  -9  13  -2   18.50    0.35
  -7  13  -2   50.09    0.80
  -5  13  -2   42.92    0.69
  -3  13  -2   40.85    0.65
  -1  13  -2   37.65    0.50
   1  13  -2   30.13    0.40
   3  13  -2   22.51    0.31
   5  13  -2    3.29    0.12
   7  13  -2    8.24    0.17
   9  13  -2    9.37    0.25
  11  13  -2   13.46    0.32
  13  13  -2   19.98    0.43
  15  13  -2   12.99    0.36
 -14  14  -2   -0.12    0.24
 -12  14  -2   10.38    0.41
 -10  14  -2   11.70    0.40
  -8  14  -2    6.28    0.20
  -6  14  -2   15.32    0.31
  -4  14  -2   34.78    0.58
  -2  14  -2   22.73    0.32
   0  14  -2   57.68    0.74
   2  14  -2   21.36    0.31
   4  14  -2    9.55    0.18
   6  14  -2    8.16    0.17
   8  14  -2    0.88    0.13
  10  14  -2   14.69    0.34
  12  14  -2   10.52    0.31
  14  14  -2    8.14    0.31
 -13  15  -2    1.54    0.25
 -11  15  -2   10.32    0.41
  -9  15  -2    9.12    0.37
  -7  15  -2   19.68    0.54
  -5  15  -2  142.94    2.22
  -3  15  -2   22.52    0.41
  -1  15  -2   78.85    1.00
   1  15  -2   26.00    0.36
   3  15  -2    7.17    0.16
   5  15  -2    2.30    0.13
   7  15  -2    2.20    0.19
   9  15  -2    2.78    0.22
  11  15  -2    8.50    0.28
  13  15  -2    7.67    0.30
 -12  16  -2   -0.01    0.23
 -10  16  -2    0.26    0.22
  -8  16  -2    7.36    0.35
  -6  16  -2    0.16    0.19
  -4  16  -2   23.13    0.42
  -2  16  -2   13.91    0.29
   0  16  -2   11.56    0.24
   2  16  -2    7.09    0.17
   4  16  -2   20.53    0.31
   6  16  -2    0.72    0.14
   8  16  -2    0.89    0.15
  10  16  -2    0.18    0.16
  12  16  -2    0.67    0.19
 -11  17  -2    1.68    0.25
  -9  17  -2   36.98    0.89
  -7  17  -2   13.00    0.43
  -5  17  -2   96.48    2.08
  -3  17  -2   25.35    0.46
  -1  17  -2   44.08    0.72
   1  17  -2   17.35    0.34
   3  17  -2    7.74    0.19
   5  17  -2    4.99    0.22
   7  17  -2    0.67    0.15
   9  17  -2    0.40    0.16
  11  17  -2    9.33    0.32
 -10  18  -2    0.63    0.25
  -8  18  -2    5.79    0.36
  -6  18  -2   30.59    0.76
  -4  18  -2   13.21    0.43
  -2  18  -2    3.55    0.27
   0  18  -2    3.93    0.20
   2  18  -2    0.31    0.13
   4  18  -2    2.28    0.21
   6  18  -2    0.35    0.15
   8  18  -2    0.02    0.16
  10  18  -2    0.81    0.18
  -7  19  -2   14.67    0.49
  -5  19  -2   34.38    0.84
  -3  19  -2   10.36    0.38
  -1  19  -2   29.85    0.72
   1  19  -2   13.52    0.31
   3  19  -2    1.52    0.24
   5  19  -2    0.33    0.16
   7  19  -2    0.52    0.17
  -6  20  -2    0.36    0.24
  -4  20  -2    2.15    0.24
  -2  20  -2    3.66    0.31
   0  20  -2    2.91    0.30
   2  20  -2   -0.06    0.24
   4  20  -2    0.39    0.25
   6  20  -2    0.89    0.25
  -4 -20  -1   19.31    0.55
  -2 -20  -1   21.19    0.59
   0 -20  -1   23.56    0.64
   4 -20  -1    2.74    0.35
  -5 -19  -1   18.36    0.53
  -3 -19  -1    1.31    0.22
  -1 -19  -1    1.38    0.23
   1 -19  -1    0.01    0.21
   3 -19  -1    0.85    0.23
   5 -19  -1    0.52    0.24
   7 -19  -1    1.68    0.27
  -6 -18  -1   44.83    1.03
  -4 -18  -1   31.26    0.73
  -2 -18  -1   28.71    0.70
   0 -18  -1   21.35    0.57
   2 -18  -1   19.21    0.55
   4 -18  -1    8.74    0.39
   6 -18  -1    0.30    0.22
   8 -18  -1    0.25    0.23
  10 -18  -1    0.95    0.26
  -7 -17  -1    1.70    0.20
  -5 -17  -1    7.52    0.32
  -3 -17  -1   15.03    0.43
  -1 -17  -1    9.92    0.37
   1 -17  -1    3.91    0.29
   3 -17  -1    2.92    0.28
   5 -17  -1    0.57    0.21
   7 -17  -1    0.14    0.21
   9 -17  -1    0.25    0.23
  11 -17  -1    0.30    0.25
  -8 -16  -1    0.32    0.18
  -6 -16  -1  104.65    2.19
  -4 -16  -1   98.57    2.06
  -2 -16  -1   32.50    0.77
   0 -16  -1   44.59    0.99
   2 -16  -1   30.04    0.72
   4 -16  -1    3.10    0.28
   6 -16  -1    1.01    0.20
   8 -16  -1    0.75    0.21
  10 -16  -1    5.54    0.36
  12 -16  -1    1.59    0.26
  -7 -15  -1    2.12    0.19
  -5 -15  -1    4.68    0.25
  -3 -15  -1    2.17    0.23
  -1 -15  -1    6.68    0.29
   1 -15  -1    3.98    0.25
   3 -15  -1    2.21    0.25
   7 -15  -1    0.41    0.19
   9 -15  -1    0.56    0.21
  11 -15  -1    6.26    0.37
  13 -15  -1    0.17    0.24
  -8 -14  -1    1.63    0.20
  -6 -14  -1   68.04    1.43
  -4 -14  -1   18.10    0.44
  -2 -14  -1   73.67    1.57
   0 -14  -1   12.01    0.36
   2 -14  -1   16.02    0.43
   4 -14  -1    0.30    0.16
   6 -14  -1   39.54    0.90
   8 -14  -1    0.16    0.18
  10 -14  -1    6.32    0.33
  12 -14  -1    0.18    0.22
  14 -14  -1   11.72    0.45
  -9 -13  -1    3.61    0.21
  -7 -13  -1   19.80    0.47
  -5 -13  -1   26.60    0.61
  -3 -13  -1   20.52    0.49
  -1 -13  -1   38.50    0.85
   1 -13  -1   83.88    1.78
   3 -13  -1   10.27    0.32
   5 -13  -1   70.52    1.54
   7 -13  -1    1.08    0.17
   9 -13  -1    5.66    0.30
  11 -13  -1    7.73    0.34
  13 -13  -1    9.17    0.38
  15 -13  -1   17.07    0.53
  -8 -12  -1   10.69    0.30
  -6 -12  -1   32.63    0.72
  -4 -12  -1   52.70    1.12
  -2 -12  -1  139.57    2.87
   0 -12  -1   21.62    0.51
   2 -12  -1   50.67    1.10
   4 -12  -1   22.94    0.55
   6 -12  -1    8.46    0.30
   8 -12  -1    0.07    0.16
  10 -12  -1   -0.02    0.18
  12 -12  -1    5.46    0.31
  14 -12  -1   26.75    0.67
  16 -12  -1   26.81    0.51
  -9 -11  -1    7.58    0.24
  -7 -11  -1   16.30    0.39
  -5 -11  -1   25.91    0.57
  -3 -11  -1   50.40    1.06
  -1 -11  -1   26.48    0.58
   1 -11  -1  138.85    2.85
   3 -11  -1   13.24    0.35
   5 -11  -1    8.33    0.27
   7 -11  -1    0.29    0.14
   9 -11  -1    2.39    0.22
  11 -11  -1   17.23    0.46
  13 -11  -1    5.93    0.32
  15 -11  -1   23.62    0.60
  17 -11  -1   20.54    0.43
 -10 -10  -1    0.24    0.11
  -8 -10  -1    1.14    0.11
  -6 -10  -1   16.23    0.38
  -4 -10  -1   70.48    1.45
  -2 -10  -1  100.75    2.03
   0 -10  -1   18.14    0.43
   2 -10  -1    8.87    0.26
   4 -10  -1   14.45    0.36
   6 -10  -1   19.30    0.46
   8 -10  -1    0.95    0.15
  10 -10  -1   17.77    0.46
  12 -10  -1    1.94    0.19
  14 -10  -1   11.27    0.37
  16 -10  -1   14.76    0.34
 -11  -9  -1   43.02    0.89
  -9  -9  -1    4.08    0.17
  -7  -9  -1   72.11    1.47
  -5  -9  -1  187.62    3.86
  -3  -9  -1  148.34    3.00
  -1  -9  -1   85.20    1.74
   1  -9  -1  161.75    3.28
   3  -9  -1   68.76    1.43
   5  -9  -1   26.15    0.58
   7  -9  -1   16.26    0.41
   9  -9  -1    1.49    0.18
  11  -9  -1   24.35    0.57
  13  -9  -1   45.95    1.01
  15  -9  -1   70.00    1.10
  17  -9  -1   36.48    0.62
 -10  -8  -1   25.03    0.54
  -8  -8  -1   48.54    1.01
  -6  -8  -1   64.43    1.34
  -4  -8  -1   26.53    0.57
  -2  -8  -1   94.89    1.92
   0  -8  -1   10.86    0.27
   2  -8  -1  226.31    4.52
   4  -8  -1    5.12    0.18
   6  -8  -1   14.32    0.35
   8  -8  -1    0.88    0.12
  10  -8  -1   35.05    0.76
  12  -8  -1   39.19    0.83
  14  -8  -1   28.53    0.48
  16  -8  -1   30.58    0.53
  18  -8  -1   34.29    0.89
 -11  -7  -1    0.81    0.10
  -9  -7  -1    0.98    0.09
  -7  -7  -1  147.43    2.94
  -5  -7  -1   44.77    0.93
  -3  -7  -1  210.34    4.27
  -1  -7  -1   80.89    1.64
   1  -7  -1   68.55    1.40
   3  -7  -1  244.30    4.95
   5  -7  -1    1.33    0.12
   7  -7  -1    3.86    0.17
   9  -7  -1    0.21    0.05
  11  -7  -1    3.02    0.19
  13  -7  -1   36.12    0.80
  15  -7  -1   25.96    0.45
  17  -7  -1   36.60    0.62
 -12  -6  -1    3.75    0.17
 -10  -6  -1   15.85    0.35
  -8  -6  -1   11.67    0.27
  -6  -6  -1  274.08    5.46
  -4  -6  -1    0.66    0.08
  -2  -6  -1    5.33    0.14
   0  -6  -1    5.96    0.16
   2  -6  -1  175.96    3.60
   4  -6  -1   14.23    0.33
   6  -6  -1   15.36    0.36
   8  -6  -1    1.03    0.06
  10  -6  -1    0.10    0.06
  12  -6  -1   10.97    0.31
  14  -6  -1   27.33    0.46
  16  -6  -1   14.23    0.31
  18  -6  -1    3.62    0.36
 -11  -5  -1   15.75    0.36
  -9  -5  -1   25.99    0.55
  -7  -5  -1  120.29    2.43
  -5  -5  -1  208.40    4.12
  -3  -5  -1  133.44    2.70
  -1  -5  -1  239.56    4.84
   1  -5  -1  316.85    6.50
   3  -5  -1   57.22    1.16
   5  -5  -1   18.23    0.39
   7  -5  -1    0.11    0.04
   9  -5  -1   26.36    0.41
  11  -5  -1   28.10    0.44
  13  -5  -1    1.05    0.08
  15  -5  -1   67.52    1.03
  17  -5  -1   81.33    1.79
  19  -5  -1   23.04    0.66
 -12  -4  -1   10.69    0.26
 -10  -4  -1    1.22    0.11
  -8  -4  -1    6.81    0.18
  -6  -4  -1   40.94    0.85
  -4  -4  -1    9.49    0.21
  -2  -4  -1  333.23    6.67
   0  -4  -1  120.58    2.53
   2  -4  -1   19.21    0.41
   4  -4  -1    1.94    0.09
   6  -4  -1   15.40    0.24
   8  -4  -1   -0.02    0.04
  10  -4  -1    0.64    0.06
  12  -4  -1    0.11    0.07
  14  -4  -1   45.62    0.59
  16  -4  -1    0.49    0.13
  18  -4  -1    5.94    0.37
 -13  -3  -1    1.16    0.14
 -11  -3  -1   42.55    0.86
  -9  -3  -1   25.44    0.53
  -7  -3  -1   45.41    0.93
  -5  -3  -1  138.56    2.79
  -3  -3  -1  734.59   14.31
  -1  -3  -1   30.94    0.63
   1  -3  -1  231.12    4.76
   3  -3  -1  476.79    9.62
   5  -3  -1  216.08    3.18
   7  -3  -1    3.46    0.08
   9  -3  -1   28.62    0.36
  11  -3  -1   15.57    0.22
  13  -3  -1   40.00    0.51
  15  -3  -1   67.58    0.84
  17  -3  -1   43.09    0.98
  19  -3  -1   30.96    0.77
 -14  -2  -1    3.57    0.17
 -12  -2  -1    0.56    0.09
 -10  -2  -1    0.94    0.11
  -8  -2  -1   33.28    0.68
  -6  -2  -1   21.06    0.44
  -4  -2  -1   16.75    0.36
  -2  -2  -1  156.82    3.04
   0  -2  -1   68.64    1.42
   2  -2  -1    0.42    0.04
   4  -2  -1    2.94    0.06
   6  -2  -1   17.35    0.27
   8  -2  -1   65.11    0.79
  10  -2  -1    1.35    0.07
  12  -2  -1   14.24    0.21
  14  -2  -1    9.73    0.18
  16  -2  -1    7.91    0.22
  18  -2  -1    0.57    0.16
 -13  -1  -1    7.24    0.22
 -11  -1  -1   25.17    0.54
  -9  -1  -1   25.10    0.53
  -7  -1  -1  129.28    2.61
  -5  -1  -1  456.77    9.26
  -3  -1  -1  306.95    4.59
   3  -1  -1   12.39    0.19
   5  -1  -1   58.59    0.71
   7  -1  -1    4.77    0.08
   9  -1  -1  100.62    1.50
  11  -1  -1   27.47    0.35
  13  -1  -1   25.45    0.34
  15  -1  -1   65.23    1.01
  17  -1  -1   95.38    1.23
  19  -1  -1   54.29    0.91
 -12   0  -1    0.03    0.09
 -10   0  -1    0.02    0.06
  -8   0  -1    0.03    0.05
  -6   0  -1   -0.10    0.03
  -4   0  -1   -0.29    0.09
  -2   0  -1   -0.83    0.24
   2   0  -1    0.02    0.01
   4   0  -1    0.05    0.02
   6   0  -1   -0.13    0.05
   8   0  -1   -0.08    0.05
  10   0  -1   -0.02    0.05
  12   0  -1    0.02    0.06
  14   0  -1    0.03    0.07
  16   0  -1    0.05    0.10
  18   0  -1    0.25    0.12
  20   0  -1    0.51    0.29
 -13   1  -1    6.58    0.27
 -11   1  -1   23.14    0.61
  -9   1  -1   23.77    0.40
  -7   1  -1  129.25    1.57
  -5   1  -1  460.08    4.84
  -3   1  -1  316.22    3.31
   3   1  -1   12.39    0.19
   5   1  -1   58.68    0.88
   7   1  -1    4.80    0.10
   9   1  -1   99.23    1.50
  11   1  -1   27.87    0.44
  13   1  -1   25.73    0.32
  15   1  -1   65.46    0.84
  17   1  -1   96.23    1.23
  19   1  -1   54.17    0.79
 -14   2  -1    3.26    0.25
 -12   2  -1    0.74    0.13
 -10   2  -1    0.89    0.08
  -8   2  -1   32.39    0.42
  -6   2  -1   21.00    0.27
  -4   2  -1   17.07    0.22
  -2   2  -1  146.98    1.86
   0   2  -1   70.02    0.86
   2   2  -1    0.30    0.02
   4   2  -1    3.04    0.06
   6   2  -1   17.31    0.28
   8   2  -1   65.18    0.98
  10   2  -1    1.24    0.08
  12   2  -1   14.35    0.22
  14   2  -1    9.63    0.19
  16   2  -1    8.00    0.19
  18   2  -1    0.76    0.13
 -15   3  -1   18.92    0.54
 -13   3  -1    1.39    0.16
 -11   3  -1   40.29    0.66
  -9   3  -1   24.81    0.33
  -7   3  -1   45.22    0.70
  -5   3  -1  137.18    1.71
  -3   3  -1  693.02    8.74
  -1   3  -1   30.41    0.39
   1   3  -1  234.45    2.90
   3   3  -1  473.46    7.22
   5   3  -1  216.06    2.68
   7   3  -1    3.60    0.10
   9   3  -1   28.68    0.38
  11   3  -1   15.36    0.23
  13   3  -1   40.44    0.53
  15   3  -1   68.05    0.88
  17   3  -1   42.07    0.58
  19   3  -1   29.01    0.57
 -18   4  -1    1.59    0.23
 -16   4  -1    0.52    0.19
 -14   4  -1    0.42    0.15
 -12   4  -1   10.13    0.22
 -10   4  -1    1.18    0.09
  -8   4  -1    6.56    0.15
  -6   4  -1   40.88    0.52
  -4   4  -1    9.29    0.13
  -2   4  -1  324.72    4.07
   0   4  -1  125.68    1.54
   2   4  -1   19.02    0.25
   4   4  -1    1.98    0.06
   6   4  -1   15.38    0.21
   8   4  -1    0.02    0.05
  10   4  -1    0.67    0.06
  12   4  -1    0.07    0.07
  14   4  -1   47.87    0.62
  16   4  -1    0.74    0.11
  18   4  -1    6.01    0.27
 -17   5  -1   31.33    0.80
 -15   5  -1   43.25    1.04
 -13   5  -1   13.43    0.28
 -11   5  -1   14.97    0.29
  -9   5  -1   25.17    0.43
  -7   5  -1  119.48    1.49
  -5   5  -1  201.09    2.52
  -3   5  -1  132.19    1.65
  -1   5  -1  235.77    2.95
   1   5  -1  323.51    3.96
   3   5  -1   57.25    0.87
   5   5  -1   17.61    0.34
   7   5  -1    0.14    0.04
   9   5  -1   26.35    0.35
  11   5  -1   28.11    0.38
  13   5  -1    1.02    0.09
  15   5  -1   67.93    0.88
  17   5  -1   82.67    1.34
  19   5  -1   23.54    0.49
 -18   6  -1    1.09    0.24
 -16   6  -1   22.31    0.60
 -14   6  -1    1.39    0.13
 -12   6  -1    3.67    0.16
 -10   6  -1   15.42    0.22
  -8   6  -1   11.36    0.22
  -6   6  -1  267.46    3.34
  -4   6  -1    0.55    0.04
  -2   6  -1    4.97    0.08
   0   6  -1    6.22    0.09
   2   6  -1  182.68    2.70
   4   6  -1   14.36    0.20
   6   6  -1   15.64    0.22
   8   6  -1    0.91    0.08
  10   6  -1    0.07    0.06
  12   6  -1   11.02    0.19
  14   6  -1   26.86    0.39
  16   6  -1   14.35    0.34
  18   6  -1    3.57    0.26
 -17   7  -1   50.71    1.19
 -15   7  -1   10.10    0.37
 -13   7  -1    0.24    0.11
 -11   7  -1    0.61    0.10
  -9   7  -1    1.00    0.09
  -7   7  -1  143.33    1.80
  -5   7  -1   44.76    0.57
  -3   7  -1  209.04    2.60
  -1   7  -1   79.64    1.00
   1   7  -1   68.68    1.05
   3   7  -1  244.82    3.12
   5   7  -1    1.27    0.06
   7   7  -1    4.21    0.10
   9   7  -1    0.21    0.07
  11   7  -1    2.77    0.11
  13   7  -1   36.71    0.50
  15   7  -1   26.13    0.49
  17   7  -1   37.30    0.67
 -16   8  -1    3.88    0.31
 -14   8  -1    1.09    0.13
 -12   8  -1    4.36    0.17
 -10   8  -1   24.51    0.42
  -8   8  -1   48.16    0.62
  -6   8  -1   65.11    0.82
  -4   8  -1   26.75    0.35
  -2   8  -1   92.83    1.17
   0   8  -1   10.79    0.19
   2   8  -1  225.95    2.76
   4   8  -1    5.29    0.10
   6   8  -1   14.74    0.21
   8   8  -1    0.89    0.09
  10   8  -1   34.14    0.46
  12   8  -1   37.53    0.51
  14   8  -1   28.18    0.52
  16   8  -1   30.14    0.57
  18   8  -1   35.71    0.66
 -15   9  -1    5.62    0.23
 -13   9  -1    2.06    0.17
 -11   9  -1   41.81    0.68
  -9   9  -1    3.54    0.15
  -7   9  -1   70.60    0.90
  -5   9  -1  189.78    2.36
  -3   9  -1  145.41    1.83
  -1   9  -1   84.29    1.31
   1   9  -1  161.92    2.00
   3   9  -1   70.14    0.87
   5   9  -1   26.31    0.35
   7   9  -1   17.21    0.24
   9   9  -1    1.28    0.09
  11   9  -1   24.40    0.35
  13   9  -1   45.84    0.78
  15   9  -1   71.43    1.18
  17   9  -1   37.04    0.68
 -16  10  -1    0.02    0.22
 -14  10  -1    2.63    0.20
 -12  10  -1    0.68    0.12
 -10  10  -1    0.05    0.10
  -8  10  -1    0.87    0.10
  -6  10  -1   16.36    0.28
  -4  10  -1   69.49    0.88
  -2  10  -1   97.69    1.53
   0  10  -1   18.77    0.26
   2  10  -1    9.04    0.15
   4  10  -1   14.52    0.21
   6  10  -1   19.56    0.27
   8  10  -1    0.94    0.07
  10  10  -1   18.06    0.27
  12  10  -1    1.68    0.15
  14  10  -1   10.35    0.30
  16  10  -1   14.33    0.37
 -15  11  -1    2.44    0.32
 -13  11  -1    1.02    0.14
 -11  11  -1    6.88    0.21
  -9  11  -1    7.37    0.20
  -7  11  -1   16.39    0.30
  -5  11  -1   25.52    0.35
  -3  11  -1   50.00    1.08
  -1  11  -1   25.95    0.35
   1  11  -1  140.49    1.74
   3  11  -1   13.49    0.20
   5  11  -1    8.37    0.15
   7  11  -1    0.15    0.07
   9  11  -1    2.48    0.12
  11  11  -1   16.72    0.35
  13  11  -1    5.80    0.25
  15  11  -1   23.01    0.48
  17  11  -1   20.12    0.46
 -16  12  -1    5.51    0.38
 -14  12  -1    7.44    0.37
 -12  12  -1    0.13    0.13
 -10  12  -1    7.44    0.22
  -8  12  -1   10.49    0.24
  -6  12  -1   32.83    0.55
  -4  12  -1   52.99    0.84
  -2  12  -1  138.43    1.75
   0  12  -1   21.96    0.30
   2  12  -1   52.37    0.66
   4  12  -1   23.64    0.32
   6  12  -1    9.16    0.17
   8  12  -1    0.18    0.08
  10  12  -1    0.16    0.13
  12  12  -1    5.13    0.23
  14  12  -1   26.06    0.52
  16  12  -1   26.63    0.54
 -15  13  -1    9.73    0.43
 -13  13  -1    3.15    0.32
 -11  13  -1    4.60    0.20
  -9  13  -1    3.63    0.18
  -7  13  -1   19.66    0.36
  -5  13  -1   26.56    0.46
  -3  13  -1   20.61    0.29
  -1  13  -1   38.80    0.51
   1  13  -1   86.65    1.08
   3  13  -1   10.09    0.18
   5  13  -1   73.94    0.93
   7  13  -1    0.96    0.09
   9  13  -1    5.95    0.22
  11  13  -1    7.47    0.26
  13  13  -1    9.06    0.29
  15  13  -1   16.86    0.41
 -14  14  -1    5.92    0.38
 -12  14  -1    0.66    0.21
 -10  14  -1    1.12    0.20
  -8  14  -1    1.77    0.15
  -6  14  -1   67.89    1.08
  -4  14  -1   17.32    0.33
  -2  14  -1   75.13    1.17
   0  14  -1   12.45    0.20
   2  14  -1   16.31    0.25
   4  14  -1    0.34    0.08
   6  14  -1   40.70    0.54
   8  14  -1    0.26    0.13
  10  14  -1    5.73    0.24
  12  14  -1    0.28    0.16
  14  14  -1   11.97    0.35
 -13  15  -1    0.71    0.24
 -11  15  -1   -0.06    0.21
  -9  15  -1   13.08    0.43
  -7  15  -1    1.70    0.14
  -5  15  -1    5.14    0.19
  -3  15  -1    1.89    0.16
  -1  15  -1    7.13    0.20
   1  15  -1    3.91    0.13
   3  15  -1    2.36    0.13
   5  15  -1   35.73    0.48
   7  15  -1    0.26    0.13
   9  15  -1    0.73    0.15
  11  15  -1    6.86    0.27
  13  15  -1    0.22    0.18
 -12  16  -1    0.33    0.24
 -10  16  -1    2.38    0.31
  -8  16  -1    0.66    0.21
  -6  16  -1  105.29    2.25
  -4  16  -1   98.16    2.11
  -2  16  -1   33.84    0.57
   0  16  -1   45.12    0.73
   2  16  -1   30.91    0.43
   4  16  -1    3.81    0.15
   6  16  -1    0.89    0.14
   8  16  -1    1.13    0.15
  10  16  -1    5.56    0.26
  12  16  -1    1.93    0.19
 -11  17  -1    3.69    0.35
  -9  17  -1    1.22    0.23
  -7  17  -1    1.70    0.23
  -5  17  -1    8.22    0.24
  -3  17  -1   14.73    0.31
  -1  17  -1   10.91    0.26
   1  17  -1    4.59    0.19
   3  17  -1    3.02    0.15
   5  17  -1    0.59    0.14
   7  17  -1   -0.02    0.15
   9  17  -1    0.17    0.16
  11  17  -1   -0.08    0.17
 -10  18  -1    3.12    0.34
  -8  18  -1   12.06    0.44
  -6  18  -1   47.10    1.07
  -4  18  -1   31.26    0.75
  -2  18  -1   29.16    0.70
   0  18  -1   21.85    0.41
   2  18  -1   20.46    0.39
   4  18  -1   10.26    0.28
   6  18  -1    0.51    0.15
   8  18  -1    0.30    0.16
  10  18  -1    0.63    0.18
  -7  19  -1    3.50    0.35
  -5  19  -1   18.74    0.55
  -3  19  -1    1.72    0.22
  -1  19  -1    2.65    0.20
   1  19  -1    0.20    0.14
   3  19  -1    0.50    0.23
   5  19  -1    0.28    0.15
   7  19  -1    2.99    0.25
  -6  20  -1   26.55    0.71
  -4  20  -1   20.15    0.57
  -2  20  -1   22.58    0.59
   0  20  -1   24.73    0.63
   2  20  -1    7.36    0.39
   4  20  -1    3.01    0.36
  -4 -20   0   -0.08    0.22
  -2 -20   0    0.57    0.23
   0 -20   0    0.26    0.23
   2 -20   0    0.50    0.23
   4 -20   0   -0.19    0.23
  -5 -19   0    8.77    0.36
  -3 -19   0    3.50    0.30
  -1 -19   0   23.41    0.62
   3 -19   0    3.03    0.32
   5 -19   0    7.69    0.39
  -6 -18   0    0.00    0.19
  -4 -18   0    0.67    0.19
  -2 -18   0    0.58    0.20
   0 -18   0    0.10    0.19
   2 -18   0    0.65    0.21
   4 -18   0    0.13    0.21
   6 -18   0    0.22    0.22
   8 -18   0    0.25    0.23
  10 -18   0    1.71    0.27
  -7 -17   0   11.29    0.36
  -5 -17   0   28.47    0.68
  -3 -17   0   35.53    0.79
  -1 -17   0   35.58    0.83
   1 -17   0   34.92    0.83
   3 -17   0   32.42    0.79
   7 -17   0    8.87    0.40
   9 -17   0    0.01    0.23
  11 -17   0    0.86    0.25
  -6 -16   0    4.42    0.26
  -4 -16   0    9.79    0.33
  -2 -16   0    0.88    0.18
   0 -16   0    7.31    0.32
   2 -16   0    0.71    0.18
   4 -16   0    9.20    0.36
   6 -16   0    4.43    0.30
   8 -16   0    3.57    0.31
  10 -16   0    0.27    0.23
  12 -16   0    0.47    0.25
  -7 -15   0   29.34    0.67
  -5 -15   0   36.44    0.80
  -3 -15   0    7.94    0.29
  -1 -15   0   42.54    0.96
   1 -15   0   43.03    0.96
   3 -15   0    7.87    0.31
   5 -15   0   34.83    0.82
   7 -15   0   28.88    0.70
   9 -15   0    0.67    0.21
  11 -15   0    1.16    0.23
  13 -15   0    5.67    0.38
  -8 -14   0    0.04    0.14
  -6 -14   0   14.97    0.40
  -4 -14   0    7.80    0.28
  -2 -14   0    7.50    0.28
   0 -14   0   16.97    0.44
   2 -14   0    7.75    0.29
   4 -14   0    7.46    0.30
   6 -14   0   15.49    0.44
   8 -14   0    0.08    0.18
  10 -14   0    3.49    0.31
  12 -14   0    0.56    0.23
  14 -14   0    4.83    0.37
  -7 -13   0   31.15    0.68
  -5 -13   0   17.73    0.44
  -3 -13   0   42.53    0.91
  -1 -13   0   69.61    1.46
   1 -13   0   69.40    1.46
   3 -13   0   42.10    0.92
   5 -13   0   17.52    0.46
   7 -13   0   29.91    0.71
   9 -13   0    0.54    0.20
  11 -13   0    0.59    0.20
  13 -13   0   20.15    0.58
  15 -13   0    9.24    0.42
  -8 -12   0    0.24    0.12
  -6 -12   0   14.35    0.36
  -4 -12   0    4.75    0.20
  -2 -12   0   55.34    1.16
   0 -12   0   76.22    1.58
   2 -12   0   53.36    1.17
   4 -12   0    4.50    0.23
   6 -12   0   14.08    0.39
   8 -12   0    0.09    0.16
  10 -12   0    0.19    0.18
  12 -12   0    3.85    0.29
  14 -12   0    4.95    0.33
  16 -12   0   16.26    0.51
  -9 -11   0    0.57    0.11
  -7 -11   0    2.77    0.16
  -5 -11   0   28.83    0.64
  -3 -11   0   23.99    0.52
  -1 -11   0  100.79    2.10
   1 -11   0  100.79    2.11
   3 -11   0   23.18    0.53
   5 -11   0   29.06    0.66
   7 -11   0    2.62    0.21
   9 -11   0    0.47    0.16
  11 -11   0    0.20    0.18
  13 -11   0    1.51    0.21
  15 -11   0    7.09    0.35
  17 -11   0    6.87    0.28
 -10 -10   0    1.35    0.15
  -8 -10   0   12.23    0.30
  -6 -10   0   46.89    0.99
  -4 -10   0    8.67    0.23
  -2 -10   0   59.50    1.24
   0 -10   0  150.03    3.05
   2 -10   0   60.31    1.25
   4 -10   0    8.26    0.26
   6 -10   0   47.62    1.01
   8 -10   0   11.60    0.34
  10 -10   0    1.28    0.17
  12 -10   0    6.95    0.30
  14 -10   0    1.82    0.21
  16 -10   0   25.36    0.47
  -9  -9   0   12.08    0.30
  -7  -9   0   96.10    1.97
  -5  -9   0   81.43    1.69
  -3  -9   0  175.76    3.54
  -1  -9   0  191.10    3.84
   1  -9   0  192.01    3.84
   3  -9   0  175.60    3.54
   5  -9   0   82.89    1.70
   7  -9   0   96.62    1.98
   9  -9   0   11.81    0.33
  11  -9   0   29.90    0.69
  13  -9   0    4.54    0.26
  15  -9   0    0.40    0.20
  17  -9   0   19.82    0.40
 -10  -8   0    0.93    0.10
  -8  -8   0   13.02    0.30
  -6  -8   0   58.51    1.22
  -4  -8   0   80.51    1.65
  -2  -8   0  147.56    2.98
   0  -8   0   66.82    1.38
   2  -8   0  148.99    2.99
   4  -8   0   81.90    1.66
   6  -8   0   58.83    1.23
   8  -8   0   13.22    0.33
  10  -8   0    0.86    0.14
  12  -8   0    2.10    0.21
  14  -8   0   46.28    1.01
  16  -8   0   46.47    0.75
  18  -8   0   41.92    0.71
 -11  -7   0    1.55    0.13
  -9  -7   0   41.88    0.86
  -7  -7   0   88.54    1.76
  -5  -7   0   66.72    1.37
  -3  -7   0    9.43    0.22
  -1  -7   0   80.46    1.63
   1  -7   0   80.47    1.64
   3  -7   0    9.35    0.23
   5  -7   0   67.56    1.38
   7  -7   0   85.71    1.77
   9  -7   0   40.83    0.88
  11  -7   0    1.58    0.19
  13  -7   0    1.16    0.16
  15  -7   0   27.64    0.48
  17  -7   0   25.83    0.48
 -10  -6   0    0.81    0.09
  -8  -6   0   19.91    0.42
  -6  -6   0   70.51    1.41
  -4  -6   0   50.47    1.03
  -2  -6   0  182.01    3.57
   0  -6   0  182.16    3.64
   2  -6   0  177.71    3.57
   4  -6   0   49.81    1.04
   6  -6   0   67.74    1.42
   8  -6   0   19.56    0.44
  10  -6   0    0.80    0.08
  12  -6   0    4.26    0.14
  14  -6   0   12.85    0.27
  16  -6   0   35.32    0.59
  18  -6   0   14.46    0.49
 -11  -5   0    0.07    0.08
  -9  -5   0    2.28    0.11
  -7  -5   0   59.79    1.22
  -5  -5   0  352.09    6.96
  -3  -5   0   50.78    1.05
  -1  -5   0   52.84    1.11
   1  -5   0   54.59    1.12
   3  -5   0   50.73    1.06
   5  -5   0  336.81    6.97
   7  -5   0   59.77    1.23
   9  -5   0    2.17    0.09
  11  -5   0   -0.07    0.07
  13  -5   0    6.56    0.14
  15  -5   0   22.51    0.40
  17  -5   0    0.53    0.14
  19  -5   0    9.22    0.42
 -12  -4   0   15.08    0.34
 -10  -4   0    3.20    0.12
  -8  -4   0   39.69    0.82
  -6  -4   0  125.20    2.55
  -4  -4   0  345.71    7.00
  -2  -4   0  495.85    9.88
   2  -4   0  492.54    9.91
   4  -4   0  349.60    7.03
   6  -4   0  124.67    2.56
   8  -4   0   38.78    0.83
  10  -4   0    3.06    0.11
  12  -4   0   14.88    0.22
  14  -4   0   37.35    0.50
  16  -4   0   94.00    1.42
  18  -4   0   30.28    0.74
 -13  -3   0    4.72    0.17
 -11  -3   0    9.69    0.24
  -9  -3   0   18.09    0.38
  -7  -3   0    1.87    0.08
  -5  -3   0    1.95    0.07
  -3  -3   0   82.35    1.77
  -1  -3   0    5.67    0.13
   1  -3   0    5.44    0.13
   3  -3   0   88.87    1.78
   5  -3   0    1.95    0.08
   7  -3   0    1.94    0.10
   9  -3   0   17.53    0.28
  11  -3   0    9.54    0.16
  13  -3   0    4.42    0.12
  15  -3   0   11.70    0.20
  17  -3   0    0.58    0.21
  19  -3   0    6.76    0.27
 -12  -2   0    6.28    0.18
 -10  -2   0    2.28    0.11
  -8  -2   0   63.32    1.26
  -6  -2   0    1.23    0.07
  -4  -2   0  620.21   12.41
  -2  -2   0   79.51    1.53
   2  -2   0   75.12    1.54
   4  -2   0  618.70   12.44
   6  -2   0    1.25    0.08
   8  -2   0   61.77    1.32
  10  -2   0    2.29    0.08
  12  -2   0    5.82    0.13
  14  -2   0   13.64    0.24
  16  -2   0   18.24    0.34
  18  -2   0   39.99    0.69
 -11  -1   0    1.50    0.11
  -9  -1   0    0.08    0.05
  -7  -1   0    1.66    0.07
  -5  -1   0   31.82    0.49
  -3  -1   0   81.65    1.21
  -1  -1   0   26.10    0.53
   3  -1   0   81.07    1.62
   5  -1   0   32.64    0.69
   7  -1   0    1.38    0.07
   9  -1   0    0.03    0.05
  11  -1   0    1.60    0.08
  13  -1   0    0.74    0.08
  15  -1   0   14.75    0.24
  17  -1   0    1.03    0.13
  19  -1   0    1.12    0.18
 -12   0   0    1.34    0.15
 -10   0   0   59.92    0.92
  -8   0   0  136.81    2.06
  -6   0   0  105.17    2.04
  -4   0   0  549.40    8.08
  -2   0   0  428.20    5.17
   2   0   0  415.50    9.02
   4   0   0  527.88    7.98
   6   0   0  104.82    1.55
   8   0   0  136.73    2.03
  10   0   0   59.84    0.91
  12   0   0    1.20    0.08
  14   0   0   14.05    0.23
  16   0   0   85.14    1.09
  18   0   0   57.01    0.76
 -15   1   0   15.16    0.46
 -13   1   0    0.86    0.15
 -11   1   0    1.57    0.17
  -9   1   0    0.07    0.09
  -7   1   0    1.59    0.11
  -5   1   0   31.95    0.40
  -3   1   0   79.53    0.99
   3   1   0   79.80    1.19
   5   1   0   31.25    0.48
   7   1   0    1.40    0.07
   9   1   0   -0.07    0.05
  11   1   0    1.48    0.09
  13   1   0    0.70    0.08
  15   1   0   15.12    0.25
  17   1   0    1.04    0.12
  19   1   0    1.11    0.18
 -16   2   0   15.90    0.51
 -14   2   0   13.65    0.42
 -12   2   0    5.93    0.25
 -10   2   0    2.33    0.16
  -8   2   0   60.29    0.95
  -6   2   0    1.21    0.05
  -4   2   0  614.08    7.60
  -2   2   0   74.77    0.94
   2   2   0   74.15    1.15
   4   2   0  610.92    7.60
   6   2   0    1.31    0.05
   8   2   0   61.09    0.77
  10   2   0    2.32    0.09
  12   2   0    5.94    0.14
  14   2   0   14.12    0.23
  16   2   0   16.87    0.28
  18   2   0   39.38    0.70
 -17   3   0    0.31    0.21
 -15   3   0   11.61    0.39
 -13   3   0    4.52    0.24
 -11   3   0    9.27    0.30
  -9   3   0   17.47    0.30
  -7   3   0    2.05    0.06
  -5   3   0    1.89    0.05
  -3   3   0   88.31    1.08
  -1   3   0    5.63    0.08
   1   3   0    5.59    0.10
   3   3   0   88.59    1.33
   5   3   0    1.90    0.05
   7   3   0    1.93    0.06
   9   3   0   17.46    0.24
  11   3   0    9.50    0.16
  13   3   0    4.33    0.13
  15   3   0   11.70    0.22
  17   3   0    0.34    0.15
  19   3   0    7.04    0.29
 -18   4   0   28.58    0.79
 -16   4   0   95.96    2.21
 -14   4   0   39.19    0.93
 -12   4   0   15.08    0.42
 -10   4   0    3.01    0.12
  -8   4   0   39.21    0.63
  -6   4   0  125.52    1.56
  -4   4   0  343.70    4.29
  -2   4   0  480.95    6.03
   2   4   0  490.62    6.04
   4   4   0  348.93    5.27
   6   4   0  127.22    1.57
   8   4   0   39.66    0.51
  10   4   0    2.99    0.10
  12   4   0   14.42    0.23
  14   4   0   37.72    0.51
  16   4   0   96.17    1.53
  18   4   0   29.47    0.56
 -19   5   0    9.14    0.42
 -17   5   0    0.62    0.22
 -15   5   0   23.84    0.62
 -13   5   0    6.35    0.27
 -11   5   0    0.05    0.09
  -9   5   0    2.26    0.11
  -7   5   0   59.39    0.75
  -5   5   0  342.45    4.27
  -3   5   0   51.19    0.64
  -1   5   0   53.77    0.68
   1   5   0   55.23    0.68
   3   5   0   52.02    0.79
   5   5   0  347.34    5.24
   7   5   0   59.67    0.92
   9   5   0    2.16    0.08
  11   5   0    0.00    0.07
  13   5   0    6.20    0.15
  15   5   0   22.65    0.44
  17   5   0    0.66    0.16
  19   5   0    8.82    0.32
 -18   6   0   14.10    0.50
 -16   6   0   37.00    0.90
 -14   6   0   12.69    0.41
 -12   6   0    4.45    0.17
 -10   6   0    0.78    0.09
  -8   6   0   18.83    0.26
  -6   6   0   68.91    0.86
  -4   6   0   49.76    0.63
  -2   6   0  171.49    2.18
   0   6   0  179.07    2.23
   2   6   0  179.77    2.68
   4   6   0   50.32    0.63
   6   6   0   68.76    0.86
   8   6   0   19.15    0.32
  10   6   0    0.66    0.07
  12   6   0    4.03    0.13
  14   6   0   12.86    0.30
  16   6   0   35.39    0.64
  18   6   0   14.19    0.37
 -17   7   0   28.01    0.73
 -15   7   0   29.25    0.73
 -13   7   0    1.28    0.12
 -11   7   0    1.53    0.12
  -9   7   0   41.13    0.67
  -7   7   0   85.10    1.08
  -5   7   0   66.43    0.84
  -3   7   0    9.34    0.13
  -1   7   0   78.91    1.00
   1   7   0   80.87    1.23
   3   7   0    9.15    0.14
   5   7   0   67.54    0.84
   7   7   0   86.40    1.08
   9   7   0   41.51    0.66
  11   7   0    1.58    0.10
  13   7   0    0.91    0.13
  15   7   0   27.02    0.52
  17   7   0   26.14    0.52
 -18   8   0   44.32    1.09
 -16   8   0   48.16    1.16
 -14   8   0   46.55    0.77
 -12   8   0    1.85    0.13
 -10   8   0    0.88    0.10
  -8   8   0   12.39    0.19
  -6   8   0   58.86    0.74
  -4   8   0   80.04    1.01
  -2   8   0  144.27    1.82
   0   8   0   66.99    1.03
   2   8   0  148.05    1.82
   4   8   0   81.54    1.01
   6   8   0   59.37    0.75
   8   8   0   12.53    0.20
  10   8   0    0.84    0.07
  12   8   0    1.58    0.14
  14   8   0   45.55    0.78
  16   8   0   47.62    0.82
  18   8   0   43.30    0.77
 -17   9   0   20.66    0.61
 -15   9   0    0.35    0.14
 -13   9   0    4.17    0.19
 -11   9   0   30.72    0.52
  -9   9   0   11.86    0.25
  -7   9   0   96.44    1.49
  -5   9   0   81.77    1.28
  -3   9   0  170.51    2.16
  -1   9   0  187.23    2.88
   1   9   0  188.66    2.34
   3   9   0  176.93    2.16
   5   9   0   83.38    1.04
   7   9   0   95.72    1.21
   9   9   0   11.92    0.19
  11   9   0   30.29    0.53
  13   9   0    4.23    0.21
  15   9   0    0.25    0.16
  17   9   0   19.65    0.44
 -16  10   0   26.95    0.72
 -14  10   0    1.48    0.15
 -12  10   0    6.79    0.21
 -10  10   0    1.22    0.11
  -8  10   0   12.19    0.25
  -6  10   0   46.89    0.75
  -4  10   0    8.25    0.14
  -2  10   0   58.94    0.93
   0  10   0  149.61    1.86
   2  10   0   60.21    0.76
   4  10   0    8.51    0.15
   6  10   0   47.40    0.61
   8  10   0   11.98    0.19
  10  10   0    1.21    0.12
  12  10   0    6.77    0.23
  14  10   0    1.17    0.16
  16  10   0   25.34    0.51
 -15  11   0    7.16    0.26
 -13  11   0    1.52    0.15
 -11  11   0   -0.02    0.11
  -9  11   0    0.25    0.10
  -7  11   0    2.78    0.14
  -5  11   0   28.57    0.48
  -3  11   0   22.42    0.39
  -1  11   0  101.99    1.28
   1  11   0  103.71    1.28
   3  11   0   23.41    0.32
   5  11   0   29.66    0.39
   7  11   0    2.82    0.10
   9  11   0    0.26    0.11
  11  11   0    0.04    0.13
  13  11   0    1.31    0.16
  15  11   0    6.93    0.28
  17  11   0    6.49    0.31
 -16  12   0   14.91    0.52
 -14  12   0    4.66    0.34
 -12  12   0    3.73    0.20
 -10  12   0    0.26    0.12
  -8  12   0    0.08    0.10
  -6  12   0   14.49    0.28
  -4  12   0    5.10    0.16
  -2  12   0   54.88    0.70
   0  12   0   76.10    0.96
   2  12   0   55.93    0.71
   4  12   0    4.99    0.12
   6  12   0   14.75    0.23
   8  12   0    0.02    0.11
  10  12   0    0.27    0.13
  12  12   0    3.74    0.22
  14  12   0    4.95    0.26
  16  12   0   14.97    0.39
 -15  13   0    9.52    0.43
 -13  13   0   20.84    0.59
 -11  13   0    0.93    0.14
  -9  13   0    0.73    0.12
  -7  13   0   30.37    0.52
  -5  13   0   18.24    0.34
  -3  13   0   41.70    0.68
  -1  13   0   69.40    0.88
   1  13   0   70.00    0.89
   3  13   0   42.98    0.55
   5  13   0   18.32    0.27
   7  13   0   30.77    0.53
   9  13   0    0.99    0.14
  11  13   0    0.56    0.15
  13  13   0   21.57    0.44
  15  13   0   10.12    0.33
 -14  14   0    5.36    0.37
 -12  14   0    0.74    0.22
 -10  14   0    3.44    0.20
  -8  14   0    0.13    0.12
  -6  14   0   15.28    0.31
  -4  14   0    8.07    0.21
  -2  14   0    7.92    0.20
   0  14   0   16.90    0.25
   2  14   0    7.75    0.16
   4  14   0    8.12    0.16
   6  14   0   15.34    0.32
   8  14   0    0.13    0.13
  10  14   0    3.61    0.22
  12  14   0    0.67    0.16
  14  14   0    5.01    0.28
 -13  15   0    5.25    0.36
 -11  15   0    1.29    0.23
  -9  15   0    0.78    0.14
  -7  15   0   29.70    0.52
  -5  15   0   35.80    0.61
  -3  15   0    7.90    0.21
  -1  15   0   43.80    0.71
   1  15   0   44.33    0.58
   3  15   0    8.02    0.17
   5  15   0   36.63    0.62
   7  15   0   29.21    0.53
   9  15   0    0.79    0.15
  11  15   0    1.52    0.17
  13  15   0    5.75    0.28
 -12  16   0    0.40    0.24
 -10  16   0    0.61    0.21
  -8  16   0    3.93    0.21
  -6  16   0    4.78    0.20
  -4  16   0    9.66    0.25
  -2  16   0    0.87    0.12
   0  16   0    8.32    0.22
   2  16   0    0.73    0.09
   4  16   0    9.54    0.25
   6  16   0    4.72    0.22
   8  16   0    3.91    0.22
  10  16   0    0.39    0.16
  12  16   0    0.44    0.18
 -11  17   0    0.76    0.24
  -9  17   0    0.23    0.21
  -7  17   0    9.98    0.28
  -5  17   0   28.72    0.51
  -3  17   0   34.21    0.58
  -1  17   0   36.53    0.61
   1  17   0   36.04    0.61
   3  17   0   33.73    0.59
   5  17   0   29.05    0.52
   7  17   0    9.88    0.29
   9  17   0   -0.15    0.16
  11  17   0    0.90    0.18
 -10  18   0    2.45    0.27
  -8  18   0    0.14    0.22
  -6  18   0   -0.16    0.20
  -4  18   0    0.70    0.15
  -2  18   0    0.68    0.14
   0  18   0    0.25    0.13
   2  18   0    0.82    0.22
   4  18   0    0.35    0.14
   6  18   0    0.03    0.15
   8  18   0   -0.09    0.16
  10  18   0    2.33    0.21
  -7  19   0   11.66    0.44
  -5  19   0    8.37    0.38
  -3  19   0    3.41    0.29
  -1  19   0   24.35    0.46
   1  19   0   24.80    0.69
   3  19   0    3.54    0.34
   5  19   0    8.63    0.42
   7  19   0   12.09    0.48
  -6  20   0    3.76    0.34
  -4  20   0    0.01    0.21
  -2  20   0    0.71    0.16
   0  20   0    0.65    0.24
   2  20   0    0.53    0.25
   4  20   0   -0.19    0.25
  -4 -20   1    2.88    0.31
  -2 -20   1    6.88    0.36
   2 -20   1   20.42    0.60
   4 -20   1   19.11    0.57
  -5 -19   1    0.20    0.21
  -3 -19   1    0.52    0.21
  -1 -19   1   -0.11    0.20
   1 -19   1    2.40    0.30
   3 -19   1    1.54    0.24
  -4 -18   1    9.88    0.36
  -2 -18   1   19.92    0.53
   0 -18   1   20.81    0.56
   2 -18   1   27.46    0.70
  10 -18   1    2.98    0.37
  -5 -17   1    0.60    0.17
  -3 -17   1    2.42    0.26
  -1 -17   1    4.21    0.28
   1 -17   1   10.68    0.37
   3 -17   1   13.85    0.44
   7 -17   1    1.40    0.23
   9 -17   1    1.17    0.24
  11 -17   1    4.28    0.38
  -6 -16   1    0.89    0.18
  -4 -16   1    3.61    0.25
  -2 -16   1   30.62    0.71
   0 -16   1   44.40    0.99
   2 -16   1   33.04    0.77
   8 -16   1    0.19    0.22
  10 -16   1    1.78    0.25
  12 -16   1    0.24    0.26
  -7 -15   1    0.13    0.16
  -5 -15   1   34.84    0.79
  -3 -15   1    2.15    0.22
  -1 -15   1    3.62    0.24
   1 -15   1    7.31    0.30
   3 -15   1    1.59    0.19
   5 -15   1    4.77    0.29
   7 -15   1    1.54    0.21
   9 -15   1   13.09    0.44
  11 -15   1    0.10    0.23
  13 -15   1    0.19    0.25
  -6 -14   1   39.54    0.88
  -4 -14   1    0.59    0.15
  -2 -14   1   15.67    0.41
   0 -14   1   12.48    0.36
   2 -14   1   73.79    1.57
   4 -14   1   16.69    0.46
   6 -14   1   66.41    1.45
   8 -14   1    1.26    0.21
  10 -14   1    0.89    0.21
  12 -14   1    0.44    0.23
  14 -14   1    5.78    0.38
  -7 -13   1    0.89    0.13
  -5 -13   1   73.03    1.52
  -3 -13   1    9.90    0.30
  -1 -13   1   85.43    1.77
   1 -13   1   38.37    0.85
   3 -13   1   19.88    0.50
   5 -13   1   26.01    0.63
   7 -13   1   19.10    0.51
   9 -13   1    3.22    0.28
  11 -13   1    4.02    0.31
  13 -13   1    3.42    0.32
  15 -13   1   10.23    0.44
  -8 -12   1    0.04    0.11
  -6 -12   1    9.01    0.26
  -4 -12   1   23.29    0.53
  -2 -12   1   51.07    1.09
   0 -12   1   21.58    0.51
   2 -12   1  139.31    2.88
   4 -12   1   51.78    1.13
   6 -12   1   31.90    0.74
   8 -12   1   10.00    0.34
  10 -12   1    7.44    0.32
  12 -12   1   -0.11    0.20
  14 -12   1    7.99    0.37
  16 -12   1    5.82    0.38
  -9 -11   1    2.58    0.16
  -7 -11   1    0.27    0.10
  -5 -11   1    8.21    0.24
  -3 -11   1   13.61    0.33
  -1 -11   1  138.36    2.85
   1 -11   1   26.20    0.59
   3 -11   1   49.64    1.07
   5 -11   1   25.29    0.59
   7 -11   1   15.90    0.42
   9 -11   1    6.86    0.28
  11 -11   1    6.72    0.31
  13 -11   1    0.67    0.21
  15 -11   1    2.66    0.31
  17 -11   1    3.15    0.31
  -8 -10   1    0.86    0.10
  -6 -10   1   19.36    0.44
  -4 -10   1   14.51    0.34
  -2 -10   1    9.05    0.24
   0 -10   1   18.99    0.43
   2 -10   1   99.50    2.04
   4 -10   1   70.30    1.46
   6 -10   1   16.23    0.40
   8 -10   1    0.73    0.15
  10 -10   1    0.14    0.16
  12 -10   1    0.92    0.18
  14 -10   1    2.48    0.27
  16 -10   1    0.12    0.21
  -9  -9   1    1.29    0.13
  -7  -9   1   16.66    0.38
  -5  -9   1   25.22    0.56
  -3  -9   1   71.46    1.42
  -1  -9   1  161.70    3.27
   1  -9   1   85.07    1.74
   3  -9   1  149.85    3.01
   5  -9   1  190.16    3.87
   7  -9   1   69.77    1.48
   9  -9   1    3.76    0.21
  11  -9   1   41.89    0.91
  13  -9   1    1.96    0.25
  15  -9   1    5.73    0.32
  17  -9   1   19.14    0.39
 -10  -8   1   35.94    0.73
  -8  -8   1    0.92    0.09
  -6  -8   1   14.66    0.33
  -4  -8   1    4.91    0.16
  -2  -8   1  219.28    4.53
   0  -8   1   10.71    0.26
   2  -8   1   93.91    1.92
   4  -8   1   26.73    0.58
   6  -8   1   65.77    1.35
   8  -8   1   47.93    1.02
  10  -8   1   24.30    0.57
  12  -8   1    4.34    0.25
  14  -8   1    0.94    0.18
  16  -8   1    3.75    0.22
  18  -8   1    9.50    0.29
  -9  -7   1    0.34    0.08
  -7  -7   1    4.43    0.14
  -5  -7   1    1.29    0.09
  -3  -7   1  243.89    4.94
  -1  -7   1   66.93    1.39
   1  -7   1   81.77    1.64
   3  -7   1  211.44    4.27
   5  -7   1   44.58    0.94
   7  -7   1  143.74    2.95
   9  -7   1    0.71    0.12
  11  -7   1    0.56    0.08
  13  -7   1    0.07    0.16
  15  -7   1    9.78    0.26
  17  -7   1   46.82    0.77
 -10  -6   1    0.16    0.07
  -8  -6   1    0.88    0.09
  -6  -6   1   16.16    0.34
  -4  -6   1   14.36    0.31
  -2  -6   1  176.05    3.60
   0  -6   1    5.81    0.16
   2  -6   1    4.92    0.15
   4  -6   1    0.54    0.07
   6  -6   1  269.58    5.46
   8  -6   1   11.31    0.29
  10  -6   1   15.11    0.38
  12  -6   1    3.47    0.14
  14  -6   1    1.48    0.18
  16  -6   1   20.96    0.39
  18  -6   1    0.89    0.24
 -11  -5   1   29.63    0.60
  -9  -5   1   27.19    0.56
  -7  -5   1    0.06    0.05
  -5  -5   1   19.54    0.38
  -3  -5   1   56.56    1.15
  -1  -5   1  320.76    6.50
   1  -5   1  242.72    4.85
   3  -5   1  130.96    2.70
   5  -5   1  203.81    4.12
   7  -5   1  118.49    2.44
   9  -5   1   26.07    0.56
  11  -5   1   15.52    0.27
  13  -5   1   13.40    0.25
  15  -5   1   42.47    0.67
  17  -5   1   30.05    0.52
  19  -5   1   12.02    0.46
 -12  -4   1    0.29    0.08
 -10  -4   1    0.70    0.07
  -8  -4   1    0.11    0.05
  -6  -4   1   15.54    0.33
  -4  -4   1    2.09    0.07
  -2  -4   1   19.53    0.40
   0  -4   1  124.47    2.53
   2  -4   1  330.74    6.68
   4  -4   1    9.14    0.22
   6  -4   1   41.90    0.86
   8  -4   1    6.88    0.20
  10  -4   1    1.33    0.10
  12  -4   1   10.27    0.21
  14  -4   1    0.41    0.08
  16  -4   1    0.64    0.13
  18  -4   1    1.38    0.24
 -11  -3   1   15.38    0.34
  -9  -3   1   29.80    0.60
  -7  -3   1    3.45    0.10
  -5  -3   1  217.83    4.37
  -3  -3   1  469.50    9.58
  -1  -3   1  231.71    4.75
   1  -3   1   30.79    0.63
   3  -3   1  703.96   14.33
   5  -3   1  139.61    2.80
   7  -3   1   43.26    0.93
   9  -3   1   25.03    0.54
  11  -3   1   42.11    0.63
  13  -3   1    1.01    0.08
  15  -3   1   19.15    0.28
  17  -3   1   25.92    0.65
  19  -3   1   62.02    1.37
 -12  -2   1   15.08    0.33
 -10  -2   1    1.23    0.09
  -8  -2   1   65.70    0.99
  -6  -2   1   17.58    0.28
  -4  -2   1    3.01    0.07
  -2  -2   1    0.34    0.02
   0  -2   1   68.07    1.41
   2  -2   1  151.51    3.05
   4  -2   1   17.29    0.36
   6  -2   1   21.52    0.45
   8  -2   1   33.11    0.69
  10  -2   1    1.00    0.07
  12  -2   1    0.46    0.07
  14  -2   1    3.64    0.13
  16  -2   1    0.31    0.09
  18  -2   1    0.63    0.15
 -11  -1   1   25.97    0.67
  -9  -1   1  102.53    1.55
  -7  -1   1    4.79    0.10
  -5  -1   1   59.86    0.89
  -3  -1   1   12.78    0.19
   9  -1   1   25.69    0.39
  11  -1   1   25.21    0.33
  13  -1   1    7.36    0.14
  15  -1   1   50.81    0.67
  17  -1   1   12.42    0.24
  19  -1   1   40.84    0.70
 -14   0   1    0.03    0.15
 -12   0   1    0.00    0.13
 -10   0   1    0.09    0.10
  -8   0   1   -0.13    0.08
  -6   0   1   -0.08    0.03
  -4   0   1    0.03    0.04
  -2   0   1    0.01    0.02
   8   0   1    0.03    0.05
  10   0   1    0.08    0.06
  12   0   1    0.17    0.08
  14   0   1    0.07    0.07
  16   0   1   -0.12    0.10
  18   0   1   -0.16    0.12
  20   0   1    0.38    0.28
 -15   1   1   64.21    1.54
 -13   1   1   24.61    0.65
 -11   1   1   27.20    0.67
  -9   1   1   98.33    2.27
  -7   1   1    4.68    0.16
  -5   1   1   57.22    1.33
  -3   1   1   12.34    0.20
   3   1   1  310.30    4.76
   5   1   1  453.08    5.67
   7   1   1  128.42    1.60
   9   1   1   24.54    0.33
  11   1   1   24.73    0.34
  13   1   1    6.92    0.15
  15   1   1   50.42    0.67
  17   1   1   12.28    0.24
  19   1   1   39.76    0.71
 -16   2   1    8.00    0.35
 -14   2   1    9.88    0.35
 -12   2   1   14.29    0.41
 -10   2   1    1.41    0.15
  -8   2   1   63.92    1.49
  -6   2   1   17.05    0.29
  -4   2   1    3.00    0.07
  -2   2   1    0.30    0.03
   0   2   1   66.36    0.89
   2   2   1  149.65    1.86
   4   2   1   16.90    0.22
   6   2   1   20.99    0.27
   8   2   1   32.53    0.42
  10   2   1    0.94    0.06
  12   2   1    0.42    0.07
  14   2   1    3.46    0.13
  16   2   1    0.38    0.11
  18   2   1    0.39    0.16
 -17   3   1   41.05    1.05
 -15   3   1   66.82    1.59
 -13   3   1   38.66    0.97
 -11   3   1   15.09    0.42
  -9   3   1   27.98    0.69
  -7   3   1    3.31    0.10
  -5   3   1  216.89    3.29
  -3   3   1  477.08    7.24
  -1   3   1  234.74    3.57
   1   3   1   30.88    0.39
   3   3   1  717.32   10.75
   5   3   1  138.33    2.10
   7   3   1   45.38    0.57
   9   3   1   24.72    0.33
  11   3   1   40.86    0.54
  13   3   1    1.18    0.09
  15   3   1   19.14    0.30
  17   3   1   25.56    0.49
  19   3   1   60.22    1.02
 -18   4   1    6.12    0.36
 -16   4   1    0.30    0.19
 -14   4   1   47.73    1.13
 -12   4   1    0.03    0.14
 -10   4   1    0.60    0.08
  -8   4   1    0.05    0.06
  -6   4   1   15.31    0.26
  -4   4   1    1.98    0.09
  -2   4   1   19.45    0.31
   0   4   1  122.62    1.53
   2   4   1  326.87    4.40
   4   4   1    9.23    0.16
   6   4   1   41.05    0.64
   8   4   1    6.85    0.12
  10   4   1    1.20    0.08
  12   4   1   10.06    0.18
  14   4   1    0.36    0.09
  16   4   1    0.39    0.14
  18   4   1    1.44    0.17
 -19   5   1   22.62    0.68
 -17   5   1   82.29    1.93
 -15   5   1   68.81    1.60
 -13   5   1    1.12    0.17
 -11   5   1   28.15    0.48
  -9   5   1   26.46    0.44
  -7   5   1    0.08    0.06
  -5   5   1   17.53    0.23
  -3   5   1   55.71    0.87
  -1   5   1  315.76    3.96
   1   5   1  238.60    2.95
   3   5   1  135.58    2.03
   5   5   1  204.98    3.10
   7   5   1  120.86    1.83
   9   5   1   25.74    0.34
  11   5   1   15.23    0.23
  13   5   1   13.54    0.22
  15   5   1   42.46    0.73
  17   5   1   30.13    0.56
  19   5   1   11.51    0.34
 -18   6   1    3.58    0.34
 -16   6   1   14.40    0.47
 -14   6   1   26.90    0.70
 -12   6   1   10.78    0.24
 -10   6   1   -0.02    0.08
  -8   6   1    0.91    0.08
  -6   6   1   15.72    0.27
  -4   6   1   14.17    0.24
  -2   6   1  175.77    2.20
   0   6   1    6.07    0.09
   2   6   1    5.40    0.11
   4   6   1    0.49    0.04
   6   6   1  271.54    3.34
   8   6   1   11.48    0.21
  10   6   1   15.39    0.24
  12   6   1    3.74    0.13
  14   6   1    1.24    0.14
  16   6   1   20.78    0.43
  18   6   1    0.78    0.18
 -17   7   1   38.18    0.96
 -15   7   1   25.88    0.70
 -13   7   1   36.22    0.61
 -11   7   1    3.07    0.15
  -9   7   1    0.55    0.10
  -7   7   1    4.22    0.13
  -5   7   1    1.23    0.09
  -3   7   1  240.62    3.00
  -1   7   1   67.62    0.85
   1   7   1   80.22    1.00
   3   7   1  212.57    2.73
   5   7   1   44.95    0.57
   7   7   1  145.79    1.80
   9   7   1    0.89    0.07
  11   7   1    0.82    0.07
  13   7   1    0.03    0.12
  15   7   1    9.83    0.28
  17   7   1   47.91    0.83
 -18   8   1   36.43    0.94
 -16   8   1   31.90    0.81
 -14   8   1   28.52    0.74
 -12   8   1   37.23    0.63
 -10   8   1   34.46    0.57
  -8   8   1    0.95    0.10
  -6   8   1   14.42    0.26
  -4   8   1    5.03    0.13
  -2   8   1  220.37    2.76
   0   8   1   10.75    0.15
   2   8   1   94.77    1.17
   4   8   1   26.86    0.35
   6   8   1   65.04    0.82
   8   8   1   48.66    0.62
  10   8   1   24.21    0.34
  12   8   1    4.53    0.19
  14   8   1    0.81    0.14
  16   8   1    3.36    0.25
  18   8   1    9.20    0.33
 -17   9   1   37.48    0.96
 -15   9   1   74.53    1.69
 -13   9   1   46.31    0.76
 -11   9   1   24.22    0.43
  -9   9   1    1.40    0.13
  -7   9   1   16.69    0.30
  -5   9   1   25.87    0.43
  -3   9   1   67.14    0.87
  -1   9   1  160.00    2.00
   1   9   1   84.97    1.06
   3   9   1  148.99    1.83
   5   9   1  191.61    2.36
   7   9   1   72.43    0.90
   9   9   1    3.88    0.11
  11   9   1   40.52    0.70
  13   9   1    1.97    0.17
  15   9   1    5.24    0.25
  17   9   1   19.27    0.43
 -16  10   1   15.05    0.50
 -14  10   1   11.20    0.28
 -12  10   1    1.93    0.15
 -10  10   1   18.53    0.35
  -8  10   1    0.97    0.10
  -6  10   1   19.22    0.34
  -4  10   1   13.81    0.20
  -2  10   1    8.86    0.14
   0  10   1   18.34    0.32
   2  10   1   99.31    1.24
   4  10   1   71.08    0.89
   6  10   1   16.28    0.23
   8  10   1    0.94    0.07
  10  10   1    0.01    0.11
  12  10   1    0.59    0.13
  14  10   1    2.20    0.19
  16  10   1    0.38    0.18
 -15  11   1   23.06    0.46
 -13  11   1    6.02    0.23
 -11  11   1   17.32    0.34
  -9  11   1    2.60    0.16
  -7  11   1    0.12    0.10
  -5  11   1    8.33    0.19
  -3  11   1   13.06    0.21
  -1  11   1  139.12    2.14
   1  11   1   26.11    0.35
   3  11   1   50.37    0.64
   5  11   1   26.23    0.35
   7  11   1   16.19    0.24
   9  11   1    7.14    0.21
  11  11   1    7.03    0.23
  13  11   1    0.69    0.16
  15  11   1    2.01    0.19
  17  11   1    3.11    0.38
 -14  12   1   26.75    0.50
 -12  12   1    5.40    0.21
 -10  12   1    0.09    0.12
  -8  12   1    0.26    0.11
  -6  12   1    9.21    0.21
  -4  12   1   23.32    0.40
  -2  12   1   50.94    0.82
   0  12   1   21.65    0.30
   2  12   1  143.14    1.75
   4  12   1   53.71    0.68
   6  12   1   33.01    0.44
   8  12   1   10.79    0.25
  10  12   1    7.62    0.24
  12  12   1    0.20    0.15
  14  12   1    7.37    0.28
  16  12   1    5.84    0.29
 -15  13   1   17.01    0.55
 -13  13   1    9.47    0.28
 -11  13   1    8.02    0.24
  -9  13   1    5.98    0.20
  -7  13   1    0.59    0.11
  -5  13   1   73.28    1.15
  -3  13   1    9.96    0.22
  -1  13   1   84.14    1.07
   1  13   1   38.81    0.51
   3  13   1   20.79    0.29
   5  13   1   27.36    0.37
   7  13   1   19.66    0.38
   9  13   1    3.75    0.20
  11  13   1    4.35    0.23
  13  13   1    3.04    0.24
  15  13   1    9.91    0.33
 -14  14   1   11.52    0.46
 -12  14   1    0.39    0.15
 -10  14   1    6.68    0.23
  -8  14   1    0.12    0.12
  -6  14   1   41.01    0.67
  -4  14   1    0.22    0.10
  -2  14   1   15.68    0.30
   0  14   1   12.50    0.20
   2  14   1   75.17    0.95
   4  14   1   17.59    0.26
   6  14   1   68.65    1.10
   8  14   1    1.48    0.14
  10  14   1    1.10    0.15
  12  14   1    0.58    0.17
  14  14   1    6.21    0.29
 -13  15   1    0.20    0.24
 -11  15   1    7.12    0.25
  -9  15   1    0.73    0.14
  -7  15   1    0.04    0.13
  -5  15   1   35.23    0.60
  -3  15   1    2.16    0.16
  -1  15   1    3.89    0.17
   1  15   1    7.21    0.16
   3  15   1    1.96    0.12
   5  15   1    5.17    0.20
   7  15   1    1.87    0.17
   9  15   1   13.33    0.32
  11  15   1   -0.03    0.16
  13  15   1    0.76    0.18
 -12  16   1    2.37    0.26
 -10  16   1    6.49    0.25
  -8  16   1    1.31    0.15
  -6  16   1    0.91    0.14
  -4  16   1    3.66    0.19
  -2  16   1   31.35    0.53
   0  16   1   44.69    0.73
   2  16   1   33.35    0.46
   4  16   1   99.09    1.57
   6  16   1  105.80    2.44
   8  16   1    0.12    0.14
  10  16   1    2.69    0.23
  12  16   1    0.24    0.18
 -11  17   1    0.00    0.24
  -9  17   1    0.21    0.21
  -7  17   1   -0.03    0.14
  -5  17   1    0.67    0.14
  -3  17   1    2.71    0.19
  -1  17   1    4.38    0.20
   1  17   1   10.07    0.25
   3  17   1   14.37    0.32
   5  17   1    7.76    0.25
   7  17   1    1.45    0.16
   9  17   1    1.20    0.17
  11  17   1    3.83    0.26
 -10  18   1    0.99    0.24
  -8  18   1    0.44    0.21
  -6  18   1    0.20    0.15
  -4  18   1   10.22    0.27
  -2  18   1   19.82    0.53
   0  18   1   21.85    0.41
   2  18   1   29.14    0.77
   4  18   1   29.91    0.82
   6  18   1   47.08    1.16
   8  18   1   11.20    0.32
  10  18   1    3.24    0.26
  -7  19   1    2.58    0.31
  -5  19   1    0.40    0.15
  -3  19   1    0.73    0.15
  -1  19   1    0.00    0.14
   1  19   1    1.71    0.25
   3  19   1    1.35    0.25
   5  19   1   20.01    0.60
   7  19   1    3.21    0.37
  -6  20   1    3.19    0.33
  -4  20   1    3.29    0.32
  -2  20   1    7.08    0.26
   0  20   1   25.01    0.70
   2  20   1   22.79    0.65
   4  20   1   20.42    0.63
  -4 -20   2    0.34    0.22
  -2 -20   2    0.02    0.22
   2 -20   2    3.38    0.34
   4 -20   2    0.93    0.26
  -3 -19   2    1.38    0.21
  -1 -19   2   12.97    0.43
   1 -19   2   27.87    0.71
   3 -19   2    9.09    0.41
  -4 -18   2    1.89    0.21
  -2 -18   2    0.01    0.19
   0 -18   2    3.52    0.30
   2 -18   2    3.71    0.31
   4 -18   2   12.09    0.44
  -5 -17   2    4.70    0.27
  -3 -17   2    7.31    0.31
  -1 -17   2   17.96    0.47
   1 -17   2   42.61    0.97
   7 -17   2   11.71    0.44
  11 -17   2    1.74    0.27
  -6 -16   2    0.83    0.17
  -4 -16   2   20.83    0.52
  -2 -16   2    6.80    0.29
   0 -16   2   10.92    0.37
   2 -16   2   13.26    0.41
   4 -16   2   22.26    0.58
   6 -16   2    0.24    0.20
   8 -16   2    7.51    0.36
  10 -16   2    0.11    0.24
  12 -16   2    0.05    0.27
  -5 -15   2    2.29    0.21
  -3 -15   2    6.97    0.28
  -1 -15   2   26.19    0.61
   3 -15   2   21.89    0.56
   7 -15   2   19.43    0.54
   9 -15   2    8.32    0.38
  13 -15   2    0.83    0.26
  -6 -14   2    7.81    0.26
  -4 -14   2    9.13    0.29
  -2 -14   2   20.88    0.51
   0 -14   2   56.93    1.22
   2 -14   2   22.70    0.55
   4 -14   2   34.35    0.79
   6 -14   2   14.88    0.43
   8 -14   2    5.53    0.29
  10 -14   2   10.73    0.41
  12 -14   2   10.33    0.42
  14 -14   2   -0.06    0.25
  -7 -13   2    7.98    0.26
  -5 -13   2    3.03    0.19
  -3 -13   2   22.31    0.52
  -1 -13   2   30.57    0.67
   1 -13   2   36.99    0.83
   3 -13   2   41.43    0.91
   5 -13   2   41.28    0.93
   7 -13   2   48.23    1.07
   9 -13   2   17.50    0.49
  11 -13   2    0.39    0.21
  13 -13   2   -0.03    0.23
  15 -13   2   -0.06    0.25
  -8 -12   2    5.89    0.21
  -6 -12   2    8.66    0.26
  -4 -12   2    1.78    0.16
  -2 -12   2   92.45    1.90
   0 -12   2   50.52    1.08
   2 -12   2   59.49    1.27
   4 -12   2   28.13    0.64
   6 -12   2   61.01    1.32
   8 -12   2   21.60    0.54
  10 -12   2    7.58    0.32
  12 -12   2    4.90    0.32
  14 -12   2    0.06    0.23
  16 -12   2    0.95    0.26
  -7 -11   2    0.23    0.10
  -5 -11   2    6.55    0.21
  -3 -11   2    4.01    0.18
  -1 -11   2    1.03    0.12
   1 -11   2   38.13    0.82
   3 -11   2   61.29    1.31
   5 -11   2   97.29    2.03
   7 -11   2   38.20    0.86
   9 -11   2   47.36    1.05
  11 -11   2    6.72    0.30
  13 -11   2    1.44    0.21
  15 -11   2    0.16    0.22
  -8 -10   2   31.38    0.67
  -6 -10   2    0.58    0.09
  -4 -10   2    9.69    0.26
  -2 -10   2   60.27    1.24
   0 -10   2   47.79    1.00
   2 -10   2   42.89    0.90
   4 -10   2  125.62    2.58
   6 -10   2  113.78    2.35
   8 -10   2   12.51    0.35
  10 -10   2   62.30    1.33
  12 -10   2    5.14    0.29
  14 -10   2    1.42    0.22
  16 -10   2    0.93    0.23
  -9  -9   2   26.69    0.58
  -7  -9   2    2.23    0.12
  -5  -9   2    1.58    0.11
  -3  -9   2    0.82    0.09
  -1  -9   2    1.98    0.13
   1  -9   2    9.95    0.26
   3  -9   2   33.80    0.71
   5  -9   2   24.36    0.54
   7  -9   2   17.98    0.43
   9  -9   2    4.59    0.23
  11  -9   2    2.45    0.24
  13  -9   2    8.13    0.32
  15  -9   2    3.19    0.29
  17  -9   2    1.26    0.18
  -8  -8   2    0.24    0.07
  -6  -8   2   -0.03    0.07
  -4  -8   2    0.66    0.07
  -2  -8   2   88.89    1.83
   0  -8   2  228.51    4.51
   2  -8   2  225.59    4.52
   4  -8   2  111.35    2.28
   6  -8   2   95.47    1.96
   8  -8   2   76.41    1.55
  10  -8   2    8.02    0.28
  12  -8   2   14.49    0.40
  14  -8   2    9.60    0.35
  16  -8   2    1.35    0.22
  18  -8   2   10.09    0.30
  -9  -7   2    6.61    0.18
  -7  -7   2  114.29    2.29
  -5  -7   2   67.54    1.43
  -3  -7   2    5.94    0.16
  -1  -7   2  138.13    2.79
   1  -7   2    5.59    0.16
   3  -7   2    1.01    0.11
   5  -7   2   30.48    0.67
   7  -7   2   12.51    0.31
   9  -7   2   27.07    0.60
  11  -7   2   19.73    0.48
  13  -7   2   32.69    0.74
  15  -7   2    3.53    0.28
  17  -7   2    0.85    0.16
 -10  -6   2   50.94    1.02
  -8  -6   2    1.81    0.09
  -6  -6   2   24.85    0.51
  -4  -6   2    2.93    0.10
  -2  -6   2  137.38    2.79
   0  -6   2  198.70    4.01
   2  -6   2  149.98    3.04
   4  -6   2   99.56    2.04
   6  -6   2  205.17    4.14
   8  -6   2  213.03    4.33
  10  -6   2   25.92    0.58
  12  -6   2    1.00    0.15
  14  -6   2    0.25    0.16
  16  -6   2    4.85    0.21
  18  -6   2    8.34    0.27
  -9  -5   2    3.33    0.11
  -7  -5   2   16.08    0.34
  -5  -5   2    2.56    0.09
  -3  -5   2   49.65    1.01
  -1  -5   2   13.20    0.28
   1  -5   2   16.93    0.36
   3  -5   2   15.37    0.34
   5  -5   2   40.77    0.84
   7  -5   2    4.81    0.17
   9  -5   2    0.54    0.11
  11  -5   2   11.45    0.32
  13  -5   2    1.36    0.11
  15  -5   2    3.24    0.18
  17  -5   2    2.56    0.21
  19  -5   2    0.64    0.17
 -10  -4   2   61.52    1.20
  -8  -4   2   22.19    0.45
  -6  -4   2    1.70    0.07
  -4  -4   2    6.13    0.14
  -2  -4   2   77.78    1.58
   2  -4   2  220.04    4.58
   4  -4   2   82.59    1.69
   6  -4   2  112.39    2.23
   8  -4   2  108.38    2.19
  10  -4   2   97.10    1.97
  12  -4   2   23.54    0.38
  14  -4   2    0.36    0.09
  16  -4   2    4.12    0.20
  18  -4   2   14.33    0.34
 -11  -3   2   19.76    0.41
  -9  -3   2    4.75    0.13
  -7  -3   2    0.02    0.04
  -5  -3   2    6.57    0.14
  -3  -3   2  306.68    6.08
  -1  -3   2    0.12    0.03
   1  -3   2  270.43    5.54
   3  -3   2   21.17    0.45
   5  -3   2   32.13    0.66
   7  -3   2    2.05    0.12
   9  -3   2   16.30    0.38
  11  -3   2    4.06    0.13
  13  -3   2    0.93    0.08
  15  -3   2    2.61    0.13
  17  -3   2    1.49    0.10
  19  -3   2    6.34    0.27
 -10  -2   2   93.72    1.40
  -8  -2   2   86.55    1.26
  -6  -2   2    3.68    0.08
  -4  -2   2    4.30    0.13
  -2  -2   2   20.78    0.43
   0  -2   2   75.56    1.55
  12  -2   2   82.37    0.99
  14  -2   2    2.90    0.13
  16  -2   2    0.16    0.09
  18  -2   2   27.97    0.42
 -13  -1   2    9.97    0.35
 -11  -1   2   17.58    0.47
  -9  -1   2   -0.02    0.10
  -7  -1   2   59.59    1.38
  -5  -1   2   18.54    0.28
  -3  -1   2    0.13    0.04
  -1  -1   2  283.97    6.30
  11  -1   2   16.66    0.29
  13  -1   2    0.46    0.07
  15  -1   2    0.04    0.08
  17  -1   2    2.94    0.17
  19  -1   2   -0.17    0.16
 -16   0   2  149.00    3.47
 -14   0   2   95.75    2.28
 -12   0   2  125.42    2.94
 -10   0   2   85.53    2.00
  -8   0   2   24.53    0.60
  -6   0   2   72.60    1.62
  -4   0   2    0.33    0.05
  -2   0   2    2.85    0.09
   2   0   2  325.60    7.24
   4   0   2  986.16   21.59
  10   0   2  150.83    1.88
  12   0   2  124.02    1.56
  14   0   2   41.47    0.55
  16   0   2    3.87    0.16
  18   0   2    7.87    0.26
 -17   1   2    0.06    0.20
 -15   1   2    0.10    0.18
 -13   1   2    9.58    0.34
 -11   1   2   17.64    0.47
  -9   1   2    0.06    0.10
  -7   1   2   59.83    1.38
  -5   1   2   16.87    0.42
  -3   1   2    0.25    0.04
  -1   1   2  273.44    6.31
   1   1   2   -0.23    0.03
   3   1   2  637.17   14.28
   5   1   2  137.97    3.12
   7   1   2    0.96    0.06
   9   1   2   10.85    0.16
  11   1   2   16.93    0.25
  13   1   2    0.60    0.08
  15   1   2    0.11    0.09
  17   1   2    3.06    0.17
  19   1   2   -0.08    0.17
 -18   2   2   18.97    0.59
 -16   2   2   54.74    1.35
 -14   2   2   79.56    1.88
 -12   2   2  181.39    4.24
 -10   2   2   89.40    2.10
  -8   2   2   81.49    1.89
  -6   2   2    3.62    0.14
  -4   2   2    4.18    0.09
  -2   2   2   21.31    0.33
   0   2   2   76.34    1.17
   2   2   2   15.60    0.38
   4   2   2  351.48    5.30
   6   2   2  135.95    1.70
   8   2   2  392.30    4.94
  10   2   2   56.50    0.72
  12   2   2   80.00    1.02
  14   2   2    3.00    0.13
  16   2   2    0.25    0.11
  18   2   2   27.83    0.53
 -19   3   2    4.62    0.36
 -17   3   2   -0.13    0.21
 -15   3   2   19.25    0.55
 -13   3   2    0.33    0.15
 -11   3   2   18.07    0.50
  -9   3   2    4.61    0.19
  -7   3   2   -0.05    0.05
  -5   3   2    6.40    0.13
  -3   3   2  300.58    4.60
  -1   3   2   -0.05    0.02
   1   3   2  278.09    4.16
   3   3   2   21.04    0.50
   5   3   2   31.27    0.49
   7   3   2    1.97    0.06
   9   3   2   16.02    0.23
  11   3   2    4.15    0.11
  13   3   2    0.97    0.09
  15   3   2    2.53    0.14
  17   3   2    1.49    0.16
  19   3   2    6.11    0.41
 -18   4   2   23.78    0.69
 -16   4   2  125.89    2.89
 -14   4   2   35.74    0.89
 -12   4   2   91.54    2.14
 -10   4   2   58.62    1.36
  -8   4   2   21.81    0.36
  -6   4   2    1.65    0.08
  -4   4   2    6.45    0.12
  -2   4   2   77.63    1.19
   0   4   2  961.34   21.95
   2   4   2  227.68    2.79
   4   4   2   82.03    1.27
   6   4   2  109.46    1.67
   8   4   2  108.06    1.34
  10   4   2   95.75    1.21
  12   4   2   22.64    0.32
  14   4   2    0.30    0.12
  16   4   2    3.98    0.22
  18   4   2   14.49    0.36
 -19   5   2   16.37    0.55
 -17   5   2    0.48    0.21
 -15   5   2   22.03    0.61
 -13   5   2    0.66    0.16
 -11   5   2   34.62    0.80
  -9   5   2    2.92    0.12
  -7   5   2   15.75    0.28
  -5   5   2    2.64    0.09
  -3   5   2   49.35    0.77
  -1   5   2   12.89    0.21
   1   5   2   16.80    0.22
   3   5   2   15.62    0.26
   5   5   2   40.39    0.51
   7   5   2    4.79    0.10
   9   5   2    0.55    0.05
  11   5   2   11.58    0.19
  13   5   2    1.46    0.13
  15   5   2    3.01    0.20
  17   5   2    2.09    0.19
  19   5   2    0.62    0.19
 -18   6   2   66.78    1.61
 -16   6   2   56.79    1.35
 -14   6   2    0.99    0.19
 -12   6   2   69.61    1.65
 -10   6   2   49.42    0.80
  -8   6   2    1.69    0.11
  -6   6   2   24.35    0.40
  -4   6   2    2.98    0.09
  -2   6   2  136.45    2.10
   0   6   2  194.23    2.56
   2   6   2  150.58    2.28
   4   6   2  100.96    1.24
   6   6   2  205.24    2.53
   8   6   2  213.00    3.24
  10   6   2   25.58    0.42
  12   6   2    1.02    0.12
  14   6   2    0.36    0.13
  16   6   2    4.98    0.24
  18   6   2    8.48    0.30
 -17   7   2    6.99    0.37
 -15   7   2   30.68    0.80
 -13   7   2   32.08    0.77
 -11   7   2  115.19    1.79
  -9   7   2    6.68    0.17
  -7   7   2  113.46    1.74
  -5   7   2   71.14    1.09
  -3   7   2    5.79    0.13
  -1   7   2  137.59    1.70
   1   7   2    5.50    0.09
   3   7   2    1.01    0.08
   5   7   2   31.28    0.43
   7   7   2   12.33    0.18
   9   7   2   26.31    0.44
  11   7   2   19.86    0.37
  13   7   2   32.85    0.58
  15   7   2    3.61    0.22
  17   7   2    0.95    0.18
 -18   8   2   22.73    0.68
 -16   8   2   34.03    0.88
 -14   8   2   46.12    1.09
 -12   8   2  105.43    1.65
 -10   8   2   39.48    0.65
  -8   8   2    0.19    0.08
  -6   8   2    0.13    0.07
  -4   8   2    0.50    0.07
  -2   8   2   88.13    1.12
   0   8   2  222.48    2.75
   2   8   2  225.72    2.76
   4   8   2  112.54    1.39
   6   8   2   96.34    1.19
   8   8   2   74.96    0.94
  10   8   2    8.23    0.21
  12   8   2   14.27    0.31
  14   8   2    9.17    0.27
  16   8   2    1.10    0.17
  18   8   2   10.18    0.33
 -17   9   2   18.76    0.59
 -15   9   2   24.12    0.65
 -13   9   2   39.82    0.67
 -11   9   2   15.92    0.32
  -9   9   2   27.16    0.46
  -7   9   2    2.21    0.12
  -5   9   2    1.56    0.11
  -3   9   2    0.65    0.07
  -1   9   2    1.83    0.07
   1   9   2    9.78    0.18
   3   9   2   33.16    0.43
   5   9   2   24.19    0.32
   7   9   2   17.47    0.25
   9   9   2    4.24    0.17
  11   9   2    2.43    0.17
  13   9   2    7.53    0.25
  15   9   2    2.88    0.23
  17   9   2    0.87    0.18
 -16  10   2   27.32    0.75
 -14  10   2   28.07    0.72
 -12  10   2   42.16    0.70
 -10  10   2   30.17    0.52
  -8  10   2   31.36    0.52
  -6  10   2    0.95    0.10
  -4  10   2    9.63    0.20
  -2  10   2   58.92    0.76
   0  10   2   46.85    0.75
   2  10   2   42.35    0.54
   4  10   2  126.45    1.57
   6  10   2  114.28    1.43
   8  10   2   12.66    0.27
  10  10   2   62.09    1.02
  12  10   2    4.97    0.21
  14  10   2    1.16    0.16
  16  10   2    0.38    0.18
 -17  11   2   29.92    0.80
 -15  11   2   16.91    0.53
 -13  11   2   57.43    1.15
 -11  11   2   32.79    0.58
  -9  11   2    4.24    0.17
  -7  11   2    0.16    0.10
  -5  11   2    6.58    0.17
  -3  11   2    3.55    0.09
  -1  11   2    0.81    0.08
   1  11   2   38.12    0.49
   3  11   2   62.96    0.79
   5  11   2   98.47    1.23
   7  11   2   38.88    0.65
   9  11   2   48.39    0.80
  11  11   2    6.70    0.23
  13  11   2    1.33    0.16
  15  11   2   -0.26    0.17
 -16  12   2   13.17    0.49
 -14  12   2   17.20    0.38
 -12  12   2   18.06    0.37
 -10  12   2    4.71    0.19
  -8  12   2    5.78    0.19
  -6  12   2    9.21    0.22
  -4  12   2    1.86    0.13
  -2  12   2   90.94    1.42
   0  12   2   50.88    0.65
   2  12   2   61.14    0.77
   4  12   2   28.48    0.38
   6  12   2   62.65    1.00
   8  12   2   21.60    0.41
  10  12   2    7.67    0.24
  12  12   2    5.57    0.24
  14  12   2    0.40    0.17
  16  12   2    0.92    0.19
 -15  13   2   13.81    0.50
 -13  13   2   20.45    0.45
 -11  13   2   13.59    0.31
  -9  13   2    9.61    0.25
  -7  13   2    7.78    0.21
  -5  13   2    3.18    0.16
  -3  13   2   21.79    0.39
  -1  13   2   29.59    0.40
   1  13   2   38.26    0.50
   3  13   2   42.43    0.55
   5  13   2   42.82    0.71
   7  13   2   49.43    0.82
   9  13   2   18.37    0.37
  11  13   2    0.36    0.15
  13  13   2    0.14    0.16
  15  13   2    0.08    0.18
 -14  14   2    8.61    0.41
 -12  14   2   10.75    0.29
 -10  14   2   14.82    0.33
  -8  14   2    1.19    0.13
  -6  14   2    7.57    0.22
  -4  14   2    9.06    0.23
  -2  14   2   20.92    0.38
   0  14   2   57.32    0.74
   2  14   2   22.87    0.32
   4  14   2   35.31    0.59
   6  14   2   15.20    0.32
   8  14   2    5.83    0.22
  10  14   2   11.31    0.30
  12  14   2   10.73    0.31
  14  14   2    0.00    0.18
 -13  15   2    7.82    0.40
 -11  15   2    8.77    0.27
  -9  15   2    2.81    0.20
  -7  15   2    2.15    0.18
  -5  15   2    2.08    0.17
  -3  15   2    7.16    0.21
  -1  15   2   25.45    0.45
   1  15   2   78.16    1.00
   3  15   2   23.36    0.33
   5  15   2  145.26    2.25
   7  15   2   20.53    0.40
   9  15   2    8.72    0.27
  11  15   2   10.40    0.31
  13  15   2    1.52    0.19
 -12  16   2    1.08    0.25
 -10  16   2    0.19    0.15
  -8  16   2    1.15    0.15
  -6  16   2    0.61    0.13
  -4  16   2   20.26    0.39
  -2  16   2    6.98    0.21
   0  16   2   11.28    0.26
   2  16   2   13.66    0.23
   4  16   2   22.61    0.43
   6  16   2    0.18    0.13
   8  16   2    7.16    0.25
  10  16   2    0.12    0.16
  12  16   2    0.02    0.17
 -11  17   2    9.01    0.42
  -9  17   2    0.44    0.15
  -7  17   2    1.10    0.15
  -5  17   2    4.87    0.21
  -3  17   2    7.87    0.23
  -1  17   2   17.07    0.34
   1  17   2   43.96    0.72
   3  17   2   25.10    0.70
   5  17   2   96.70    1.54
   7  17   2   12.50    0.31
   9  17   2   36.46    0.66
  11  17   2    1.40    0.19
 -10  18   2    1.09    0.25
  -8  18   2    0.20    0.16
  -6  18   2    0.19    0.15
  -4  18   2    2.17    0.20
  -2  18   2    0.33    0.14
   0  18   2    3.95    0.20
   2  18   2    3.80    0.33
   4  18   2   13.95    0.48
   6  18   2   29.50    0.56
   8  18   2    5.45    0.39
  10  18   2    0.59    0.18
  -7  19   2    0.39    0.16
  -5  19   2    0.08    0.15
  -3  19   2    2.04    0.22
  -1  19   2   14.27    0.48
   1  19   2   31.07    0.80
   3  19   2   10.39    0.44
   5  19   2   34.29    0.91
   7  19   2   13.83    0.36
  -6  20   2    0.75    0.22
  -4  20   2    0.45    0.16
  -2  20   2    0.00    0.24
   0  20   2    3.36    0.35
   2  20   2    4.43    0.37
   4  20   2    1.44    0.27
  -2 -20   3    0.29    0.22
   0 -20   3    8.75    0.40
   2 -20   3    4.00    0.34
  -3 -19   3    0.21    0.20
  -1 -19   3   -0.13    0.20
   1 -19   3    1.46    0.23
   3 -19   3    0.23    0.23
   5 -19   3    0.21    0.23
  -4 -18   3    0.18    0.19
  -2 -18   3    0.41    0.19
   0 -18   3    6.87    0.32
   2 -18   3    6.92    0.34
   6 -18   3    5.59    0.36
  -5 -17   3    0.91    0.18
  -3 -17   3    0.09    0.17
  -1 -17   3    0.20    0.18
   1 -17   3    2.68    0.27
   3 -17   3    0.04    0.19
   5 -17   3    8.19    0.36
   9 -17   3   10.51    0.44
  11 -17   3   -0.10    0.27
  -4 -16   3    0.87    0.16
  -2 -16   3    4.04    0.26
   0 -16   3   11.27    0.36
   2 -16   3   31.04    0.74
   6 -16   3   14.45    0.45
   8 -16   3    8.68    0.40
  -5 -15   3    4.60    0.24
  -3 -15   3    5.70    0.26
  -1 -15   3    2.42    0.22
   1 -15   3   16.01    0.43
   3 -15   3   17.52    0.48
   5 -15   3   43.98    0.99
   7 -15   3    0.65    0.21
   9 -15   3   13.49    0.45
  11 -15   3    1.62    0.25
  13 -15   3    3.13    0.38
  -6 -14   3    0.18    0.13
  -4 -14   3    3.37    0.21
  -2 -14   3   38.53    0.83
   0 -14   3   31.72    0.73
   2 -14   3   36.75    0.83
   4 -14   3   57.70    1.27
   8 -14   3    3.47    0.28
  10 -14   3   17.30    0.51
  12 -14   3   30.93    0.77
  14 -14   3    3.24    0.36
  -7 -13   3    0.49    0.12
  -5 -13   3   30.08    0.66
  -3 -13   3   39.56    0.86
  -1 -13   3   30.71    0.67
   1 -13   3    2.17    0.20
   3 -13   3   17.08    0.44
   5 -13   3   49.02    1.07
   7 -13   3   39.16    0.89
   9 -13   3    3.17    0.28
  11 -13   3   27.81    0.68
  13 -13   3    3.82    0.35
  15 -13   3    1.08    0.27
  -6 -12   3   16.69    0.40
  -4 -12   3    1.14    0.12
  -2 -12   3   39.09    0.86
   0 -12   3    1.61    0.18
   2 -12   3   50.09    1.07
   4 -12   3   47.75    1.03
   6 -12   3   81.76    1.76
   8 -12   3   45.46    1.00
  10 -12   3   46.01    1.03
  12 -12   3    7.42    0.35
  14 -12   3    7.89    0.39
  16 -12   3    4.08    0.36
  -7 -11   3   34.25    0.75
  -5 -11   3    0.17    0.10
  -3 -11   3    4.33    0.18
  -1 -11   3    9.16    0.26
   1 -11   3    1.91    0.17
   3 -11   3   89.15    1.84
   5 -11   3   51.45    1.08
   7 -11   3   78.16    1.67
   9 -11   3   18.84    0.49
  11 -11   3   30.58    0.72
  13 -11   3    1.89    0.23
  15 -11   3    1.31    0.24
  -8 -10   3    1.83    0.13
  -6 -10   3    1.10    0.12
  -4 -10   3    2.56    0.14
  -2 -10   3    8.62    0.24
   0 -10   3    1.45    0.14
   2 -10   3   76.50    1.56
   4 -10   3   54.66    1.15
   6 -10   3  104.04    2.19
   8 -10   3   26.41    0.61
  10 -10   3   25.29    0.61
  12 -10   3   25.41    0.62
  14 -10   3    0.24    0.21
  16 -10   3    2.95    0.33
  -7  -9   3  109.26    2.23
  -5  -9   3    5.98    0.17
  -3  -9   3    0.60    0.08
  -1  -9   3    2.01    0.13
   1  -9   3   51.92    1.07
   3  -9   3  146.36    2.98
   5  -9   3   55.81    1.18
   7  -9   3   40.00    0.86
   9  -9   3   47.13    0.98
  11  -9   3   91.81    1.91
  13  -9   3    2.81    0.27
  15  -9   3    4.74    0.31
  17  -9   3    0.78    0.24
  -8  -8   3    9.38    0.22
  -6  -8   3   57.40    1.20
  -4  -8   3    4.86    0.15
  -2  -8   3    7.70    0.20
   0  -8   3    2.35    0.12
[truncated: 208,716 more chars]
